# Supplementary material for: Iodine(iii)-mediated oxidative chlorination, bromination and iodination of chromone derivatives using alkyl halides as the solvent and halogen source
Source: Royal Society of Chemistry journal article supplement (doi:10.1039/d4qo00018h), 2024-01-01
Supplement: d4qo00018h1.pdf [file d4qo00018h1.pdf]

## Supporting Information

### **Iodine (III)-Mediated Oxidative Chlorination, Bromination and Iodination of Chromone Derivatives Using Alkyl Halide as Solvent and Halogen Source**

Yu-Ping Zhao,<sup>†a</sup> Jia-Lu Liao,<sup>†a</sup> Jiuzhong Huang,<sup>a</sup> Shi-Kai Xiang,<sup>\*b</sup>, and Chen-Fu Liu<sup>\*a</sup>

<sup>a</sup> School of Pharmaceutical Sciences, Gannan Medical University, Ganzhou 341000, China  
E-mail: chenfu@gmu.edu.cn

<sup>b</sup> College of Chemistry and Materials Science, Sichuan Normal University, Chengdu 610068, China.  
E-mail: xiangsk@sicnu.edu.cn

† Y.-P. Zhao and J.-L. Liao are co-first authors of the article.

#### **Content**

|                                                                      |            |
|----------------------------------------------------------------------|------------|
| <b>1. General Information</b> .....                                  | <b>S1</b>  |
| <b>2. Synthesis of protected flavones 1b-1d</b> .....                | <b>S1</b>  |
| <b>3 Chlorination of flavones</b> .....                              | <b>S2</b>  |
| <b>4 Bromination of flavones</b> .....                               | <b>S7</b>  |
| <b>5. Iodination of flavones</b> .....                               | <b>S11</b> |
| <b>6 Chlorination of Chromones</b> .....                             | <b>S13</b> |
| <b>7 Bromination of Chromones</b> .....                              | <b>S16</b> |
| <b>8 Application of 3-bromoflavone and control experiments</b> ..... | <b>S18</b> |
| <b>9 References</b> .....                                            | <b>S19</b> |
| <b>10. NMR Spectra of Products</b> .....                             | <b>S21</b> |

#### **1. General Information**

NMR spectra were recorded on a Bruker DRX 400 spectrometer (400 MHz for <sup>1</sup>H; 101 MHz for <sup>13</sup>C) using CDCl<sub>3</sub> as solvent and TMS as an internal standard. The chemical shifts are referenced to signals at 7.26 and 77.16 ppm, respectively. Chemical shifts (δ) are reported in ppm and quoted to the nearest 0.01 ppm relative to the residual protons in CDCl<sub>3</sub> (7.26 ppm for <sup>1</sup>H NMR) or TMS (0 ppm for <sup>1</sup>H NMR) and CDCl<sub>3</sub> (77.16 ppm for <sup>13</sup>C NMR). Data are reported as follows: Chemical shift (multiplicity, coupling constants, number of protons). Coupling constants were quoted to the nearest 0.1 Hz and multiplicity reported according to standard abbreviations. Column chromatography was performed on Aldrich® silica gel 60 (200 - 300 mesh). Thin-layer chromatography was performed with precoated TLC sheets of silica gel 60 F254 (Aldrich®). HRMS spectra were performed on Waters apparatus. Reagents and starting materials were purchased from commercial vendors and used without further purification. All organic solvents were dried over appropriate drying agents and distilled prior to use. Standard syringe techniques were used for transferring dry solvents.

#### **2. Synthesis of protected flavones 1b-1d**

General procedure for acetylation of flavones: the mixture of flavone (1 mmol), Ac<sub>2</sub>O (2 mL), pyridine (1 mL) was heated at 80 °C about 3 h. After completion, the mixture was evaporated by vacuum, then washed by water, dichloromethane, and submitted to column chromatography to give the *O*-acetylated product. All the *O*-acetylated flavones except the following three compounds **1b-1d** are known compound. <sup>1</sup> The *O*-benzylated flavone and *O*-methylated flavone were prepared according to the literature. <sup>2</sup>

#### 7-acetoxy-8-methylflavone (**1b**)

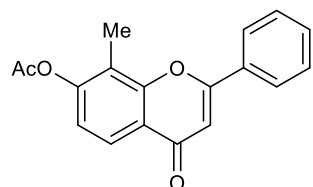

279.3 mg, 95% yield, white solid, m.p. 176-178 °C, <sup>1</sup>H NMR (400 MHz, CDCl<sub>3</sub>) δ 8.03 (d, *J* = 8.4 Hz, 1H), 7.85-7.82 (m, 2H), 7.48-7.43 (m, 3H), 7.05 (d, *J* = 8.8 Hz, 1H), 6.75 (s, 1H), 2.34 (s, 3H), 2.33 (s, 3H); <sup>13</sup>C NMR (101 MHz, CDCl<sub>3</sub>) δ 177.9, 168.8, 164.1, 156.8, 154.6, 142.6, 129.9, 128.7, 127.2, 126.3, 121.8, 119.4, 111.2, 107.0, 21.7, 21.3; HRMS (ESI) calcd for C<sub>18</sub>H<sub>15</sub>O<sub>4</sub> [(M+H)<sup>+</sup>]: 295.0965; Found: 295.0949.

#### 4'-nitro-7-acetoxyflavone (**1c**)

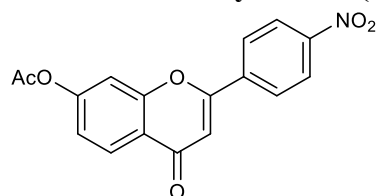

292.5 mg, 90% yield, white solid, m.p. 248-250 °C, <sup>1</sup>H NMR (400 MHz, CDCl<sub>3</sub>) δ 8.39 (d, *J* = 8.8 Hz, 2H), 8.26 (d, *J* = 8.8 Hz, 1H), 8.10 (d, *J* = 8.8 Hz, 2H), 7.47 (d, *J* = 2.0 Hz, 1H), 7.21 (dd, *J* = 8.8, 2.0 Hz, 1H), 6.90 (s, 1H), 2.39 (s, 3H); <sup>13</sup>C NMR (101 MHz, CDCl<sub>3</sub>) δ 177.4, 168.7, 161.0, 156.7, 155.1, 149.6, 137.5, 127.4, 127.4, 124.4, 121.8, 120.1, 111.3, 109.9, 21.3; HRMS (ESI) calcd for C<sub>17</sub>H<sub>12</sub>NO<sub>6</sub> [(M+H)<sup>+</sup>]: 326.0665; Found: 326.0677.

#### 3', 4, 2'', 3'', 4'', 2''', 3''', 4'''-Oct-*O*-acetyldiosmin (**1d**)

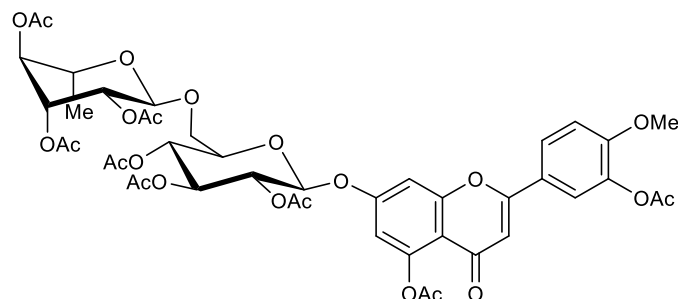

830.7 mg, 88% yield, white solid, m.p. 120-122 °C, <sup>1</sup>H NMR (400 MHz, CDCl<sub>3</sub>) δ 7.73 (dd, *J* = 8.8, 2.4 Hz, 1H), 7.56 (d, *J* = 2.4 Hz, 1H), 7.09 (d, *J* = 8.8 Hz, 1H), 6.97 (d, *J* = 2.4 Hz, 1H), 6.66 (d, *J* = 2.4 Hz, 1H), 6.52 (s, 1H), 5.36-5.27 (m, 3H), 5.24-5.17 (m, 3H), 5.05-4.99 (m, 1H), 4.72 (d, *J* = 1.2 Hz, 1H), 3.99 (ddd, *J* = 8.0, 7.2, 2.8 Hz, 1H), 3.92 (s, 3H), 3.87-3.81 (m, 2H), 3.68 (dd, *J* = 11.8, 5.2 Hz, 1H), 2.44 (s, 3H), 2.37 (s, 3H), 2.10 (s, 3H), 2.07 (s, 3H), 2.06 (s, 3H), 2.05 (s, 3H), 2.03 (s, 3H), 1.93 (s, 3H), 1.15 (d, *J* = 6.2 Hz, 3H); <sup>13</sup>C NMR (101 MHz, CDCl<sub>3</sub>) δ 176.2, 170.2, 170.0, 169.9, 169.8, 169.7, 169.4, 169.2, 168.8, 161.4, 159.8, 158.2, 154.0, 150.6, 140.0, 125.4, 123.6, 121.0, 112.6, 112.5, 109.0, 107.3, 102.2, 98.0, 97.5, 73.3, 72.4, 70.8, 70.7, 69.3, 68.9, 68.6, 66.7, 66.1, 56.1, 21.1, 20.8, 20.7, 20.6, 17.3; HRMS (ESI) calcd for C<sub>44</sub>H<sub>49</sub>O<sub>23</sub> [(M+H)<sup>+</sup>]: 945.2659; Found: 945.2650.

### 3. Chlorination of flavone derivatives

General procedure: In a sealed tube, flavone (0.3 mmol, 1.0 equiv.), PhI (TFA)<sub>2</sub> (0.45 mmol, 1.5 equiv.), CHCl<sub>3</sub> (3.0 mL) was added and heated at 80 °C until the starting material was consumed, which was monitored by TLC. After completion, the mixture

was washed by water. The organic layer was dried by anhydrous  $\text{Na}_2\text{SO}_4$ , then it was subjected to column chromatography and the chlorinated product was obtained as pure solid. It's noteworthy that  $\text{PhI}(\text{OAc})_2$  (0.9 mmol, 3.0 equiv.) instead of  $\text{PhI}(\text{TFA})_2$  (0.45 mmol, 1.5 equiv.) are employed in the synthesis of compounds **2an-2as**, **2av**.

**3-chloro-7-((5,5-dimethyl-2-oxido-1,3,2-dioxaphosphinan-2-yl) oxy)-2-phenyl-4H-chromen-4-one (2aa)**

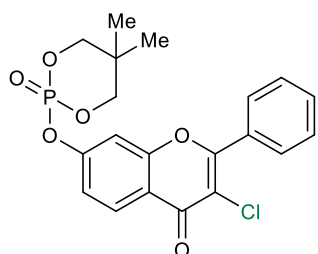

114.6 mg, 91% yield, white solid, m.p. 208-210 °C,  $^1\text{H}$  NMR (400 MHz,  $\text{CDCl}_3$ )  $\delta$  8.30 (dd,  $J = 8.8, 0.8$  Hz, 1H), 7.91-7.89 (m, 2H), 7.58-7.52 (m, 4H), 7.30 (ddd,  $J = 8.8, 2.4, 0.8$  Hz, 1H), 4.27 (d,  $J = 11.2$  Hz, 2H), 4.05 (dd,  $J = 22.8, 11.2$  Hz, 2H), 1.36 (s, 3H), 0.94 (s, 3H);  $^{13}\text{C}$  NMR (101 MHz,  $\text{CDCl}_3$ )  $\delta$  172.5, 161.0, 156.4, 154.6 (d,  $J_{\text{CP}} = 6.2$  Hz), 131.6, 131.3, 129.4, 128.6 ( $\times 2$ ), 119.6, 118.3 (d,  $J_{\text{CP}} = 6.6$  Hz), 118.2, 108.7 (d,  $J_{\text{CP}} = 4.7$  Hz), 78.9 (d,  $J_{\text{CP}} = 7.2$  Hz), 32.5 (d,  $J_{\text{CP}} = 6.2$  Hz), 21.8, 20.3 (d,  $J_{\text{CP}} = 1.1$  Hz);  $^{31}\text{P}$  NMR (162 MHz,  $\text{CDCl}_3$ )  $\delta$  -14.86; HRMS (ESI) calcd for  $\text{C}_{20}\text{H}_{18}\text{ClO}_6\text{PNa}$  [(M+Na) $^+$ ]: 443.0427; Found: 443.0421.

**3-chloro-4-oxo-2-phenyl-4H-chromen-7-yl dimethylcarbamate (2ab)**

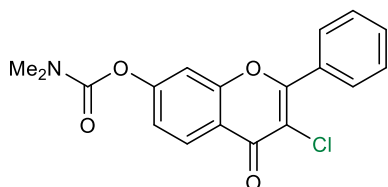

80.3 mg, 78% yield, white solid, m.p. 94-96 °C,  $^1\text{H}$  NMR (400 MHz,  $\text{CDCl}_3$ )  $\delta$  8.26 (d,  $J = 8.8$  Hz, 1H), 7.89-7.87 (m, 2H), 7.57-7.50 (m, 3H), 7.39 (d,  $J = 2.0$  Hz, 1H), 7.22 (dd,  $J = 8.8, 2.4$  Hz, 1H), 3.12 (s, 3H), 3.03 (s, 3H);  $^{13}\text{C}$  NMR (101 MHz,  $\text{CDCl}_3$ )  $\delta$  172.6, 160.8, 156.1, 156.0, 153.6, 131.4 ( $\times 2$ ), 129.3, 128.5, 127.5, 120.1, 119.5, 118.0, 110.7, 36.9, 36.7; HRMS (ESI) calcd for  $\text{C}_{18}\text{H}_{15}\text{ClNO}_4$  [(M+H) $^+$ ]: 344.0690; Found: 344.0715.

**3-chloro-4-oxo-2-phenyl-4H-chromen-7-yl dimethyl phosphate (2ac)**

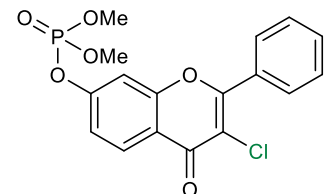

98.0 mg, 86% yield, white solid, m.p. 106-108 °C,  $^1\text{H}$  NMR (400 MHz,  $\text{CDCl}_3$ )  $\delta$  8.39 (d,  $J = 8.0$  Hz, 1H), 8.03-8.00 (m, 2H), 7.69-7.64 (m, 3H), 7.58 (dd,  $J = 2.0, 0.8$  Hz, 1H), 7.41 (ddd,  $J = 8.8, 2.0, 0.8$  Hz, 1H), 4.05 (s, 3H), 4.02 (s, 3H);  $^{13}\text{C}$  NMR (101 MHz,  $\text{CDCl}_3$ )  $\delta$  172.3, 160.9, 156.2, 154.8 (d,  $J_{\text{CP}} = 6.3$  Hz), 131.5, 131.2, 129.2, 128.5, 128.4, 119.5, 118.5 (d,  $J_{\text{CP}} = 6.0$  Hz), 118.0, 108.8 (d,  $J_{\text{CP}} = 4.7$  Hz), 55.4 ( $\times 2$ );  $^{31}\text{P}$  NMR (162 MHz,  $\text{CDCl}_3$ )  $\delta$  -4.8; HRMS (ESI) calcd for  $\text{C}_{17}\text{H}_{15}\text{ClO}_6\text{P}$  [(M+H) $^+$ ]: 381.0295; Found: 381.0294.

**3-chloro-7-benzoyloxyflavone (2ad)**

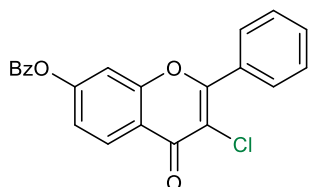

103.8 mg, 92% yield, white solid, m.p. 146-148 °C,  $^1\text{H}$  NMR (400 MHz,  $\text{CDCl}_3$ )  $\delta$  8.36 (d,  $J = 8.8$  Hz, 1H), 8.21 (dd,  $J = 8.4, 1.6$  Hz, 2H), 7.92-7.90 (m, 2H), 7.70-7.66 (m, 1H), 7.57-7.52 (m, 5H), 7.51 (d,  $J = 2.0$  Hz, 1H), 7.34 (dd,  $J = 8.8, 2.0$  Hz, 1H);  $^{13}\text{C}$  NMR (101 MHz,  $\text{CDCl}_3$ )  $\delta$  172.5, 164.4, 160.9, 156.1, 155.3, 134.3, 131.5, 131.4, 130.4, 129.3, 128.9, 128.7, 128.5, 127.9, 120.2, 120.2, 118.2, 111.2; HRMS (ESI) calcd for  $\text{C}_{22}\text{H}_{14}\text{ClO}_4$  [(M+H) $^+$ ]: 377.0575; Found: 377.0569.

**3-chloro-7-methoxyflavone (2ae)**

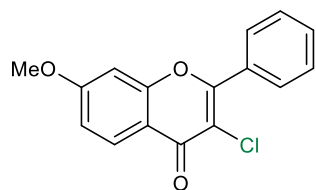

62.6 mg, 73% yield, white solid, m.p. 135-137 °C,  $^1\text{H}$  NMR (400 MHz,  $\text{CDCl}_3$ )  $\delta$  8.16 (d,  $J = 8.8$  Hz, 1H), 7.89-7.87 (m, 2H), 7.56-7.50 (m, 3H), 6.99 (dd,  $J = 8.8, 2.4$  Hz, 1H), 6.87 (d,  $J = 2.4$  Hz, 1H), 3.90 (s, 3H);  $^{13}\text{C}$  NMR (101 MHz,  $\text{CDCl}_3$ )  $\delta$  172.5, 164.5, 160.2, 157.4, 131.7, 131.2, 129.2, 128.5, 127.8, 117.9, 116.2, 115.3, 100.0, 56.0; HRMS (ESI) calcd for  $\text{C}_{16}\text{H}_{12}\text{ClO}_3$  [(M+H) $^+$ ]: 287.0475; Found: 287.0479.

### 3-chloro-7-benzyloxyflavone (2af)

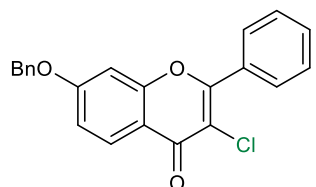

83.6 mg, 77% yield, white solid, m.p. 159-161 °C,  $^1\text{H}$  NMR (400 MHz,  $\text{CDCl}_3$ )  $\delta$  8.18 (d,  $J = 8.8$  Hz, 1H), 7.89-7.86 (m, 2H), 7.57-7.50 (m, 3H), 7.45-7.33 (m, 5H), 7.08 (dd,  $J = 8.8, 2.4$  Hz, 1H), 6.95 (d,  $J = 2.4$  Hz, 1H), 5.15 (s, 2H);  $^{13}\text{C}$  NMR (101 MHz,  $\text{CDCl}_3$ )  $\delta$  172.4, 163.6, 160.2, 157.3, 135.6, 131.6, 131.2, 129.3, 128.9, 128.6, 128.5, 127.9, 127.6, 117.9, 116.4, 115.8, 101.1, 70.7; HRMS (ESI) calcd for  $\text{C}_{22}\text{H}_{16}\text{ClO}_3$  [(M+H) $^+$ ]: 363.0782; Found: 363.0772.

### 3-chloroflavone (2ag)

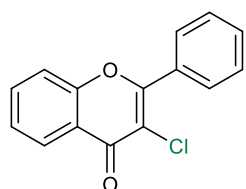

71.4 mg, 93% yield, white solid, m.p. 110-112 °C,  $^1\text{H}$  NMR (400 MHz,  $\text{CDCl}_3$ )  $\delta$  8.30 (dd,  $J = 8.0, 1.6$  Hz, 1H), 7.93-7.90 (m, 2H), 7.73 (ddd,  $J = 8.8, 7.2, 1.6$  Hz, 1H), 7.60-7.51 (m, 4H), 7.47 (t,  $J = 7.6$  Hz, 1H);  $^{13}\text{C}$  NMR (101 MHz,  $\text{CDCl}_3$ )  $\delta$  173.3, 160.8, 155.6, 134.3, 131.6, 131.4, 129.3, 128.5, 126.5, 125.8, 122.4, 118.1, 118.0; HRMS (ESI) calcd for  $\text{C}_{15}\text{H}_{10}\text{ClO}_2$  [(M+H) $^+$ ]: 257.0369; Found: 257.0380. The spectroscopic data coincide with the previous report.<sup>3</sup>

### 3-chloro-4'-acetoxyflavone (2ah)

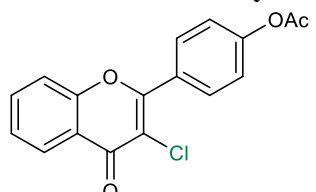

78.2 mg, 83% yield, white solid, m.p. 167-169 °C,  $^1\text{H}$  NMR (400 MHz,  $\text{CDCl}_3$ )  $\delta$  8.28 (dd,  $J = 8.0, 1.6$  Hz, 1H), 7.96 (d,  $J = 8.8$  Hz, 2H), 7.72 (ddd,  $J = 8.8, 7.2, 1.6$  Hz, 1H), 7.50 (d,  $J = 8.4$  Hz, 1H), 7.46 (tt,  $J = 8.0, 0.8$  Hz, 1H), 7.28 (d,  $J = 8.4$  Hz, 2H), 2.35 (s, 3H);  $^{13}\text{C}$  NMR (101 MHz,  $\text{CDCl}_3$ )  $\delta$  173.2, 169.1, 159.8, 155.6, 152.8, 134.4, 130.9, 129.1, 126.5, 125.9, 122.4, 121.9, 118.1, 118.0, 21.3; HRMS (ESI) calcd for  $\text{C}_{17}\text{H}_{12}\text{ClO}_4$  [(M+H) $^+$ ]: 315.0419; Found: 315.0414.

### 6-acetoxy-3-chloroflavone (2ai)

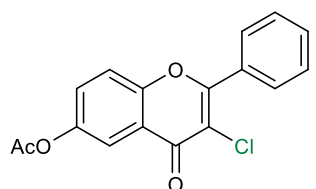

72.5 mg, 77% yield, white solid, m.p. 184-186 °C,  $^1\text{H}$  NMR (400 MHz,  $\text{CDCl}_3$ )  $\delta$  7.98 (d,  $J = 2.8$  Hz, 1H), 7.91-7.88 (m, 2H), 7.58-7.54 (m, 4H), 7.47 (dd,  $J = 9.2, 2.8$  Hz, 1H), 2.35 (s, 3H);  $^{13}\text{C}$  NMR (101 MHz,  $\text{CDCl}_3$ )  $\delta$  172.7, 169.4, 161.0, 153.2, 148.0, 131.6, 131.4, 129.4, 128.7, 128.6, 123.2, 119.5, 118.4, 117.8, 21.1; HRMS (ESI) calcd for  $\text{C}_{17}\text{H}_{12}\text{ClO}_4$  [(M+H) $^+$ ]: 315.0419; Found: 315.0414.

### 3-chloro-7-acetoxyflavone (2aj)

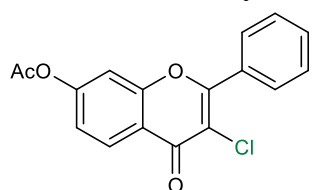

77.2 mg, 82% yield. White solid, m.p. 162-164 °C,  $^1\text{H}$  NMR (400 MHz,  $\text{CDCl}_3$ )  $\delta$  8.32 (d,  $J = 8.8$  Hz, 1H), 7.91-7.89 (m, 2H), 7.60-7.53 (m, 3H), 7.37 (d,  $J = 2.0$  Hz, 1H), 7.21 (dd,  $J = 8.8, 2.0$  Hz, 1H), 2.37 (s, 3H);  $^{13}\text{C}$  NMR (101 MHz,  $\text{CDCl}_3$ )

$\delta$  172.6, 168.6, 161.0, 156.0, 155.0, 131.5, 131.4, 129.3, 128.6, 127.9, 120.2, 120.1, 118.2, 111.1, 21.3; HRMS (ESI) calcd for  $C_{17}H_{12}ClO_4$  [(M+H)<sup>+</sup>]: 315.0424; Found: 315.0428.

### 3, 4'-dichloro-7-acetoxyflavone (2ak)

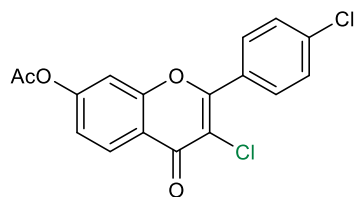

89.8 mg, 86% yield, white solid, m.p. 157-159 °C, <sup>1</sup>H NMR (400 MHz, CDCl<sub>3</sub>)  $\delta$  8.28 (d, *J* = 8.8 Hz, 1H), 7.86 (d, *J* = 8.8 Hz, 2H), 7.52 (d, *J* = 8.8 Hz, 2H), 7.36 (d, *J* = 2.0 Hz, 1H), 7.20 (dd, *J* = 8.8, 2.0 Hz, 1H), 2.36 (s, 3H); <sup>13</sup>C NMR (101 MHz, CDCl<sub>3</sub>)  $\delta$  172.2, 168.5, 159.6, 155.9,

155.0, 137.7, 130.7, 129.7, 128.9, 127.9, 120.2, 120.0, 118.2, 111.0, 21.3; HRMS (ESI) calcd for  $C_{17}H_{11}Cl_2O_4$  [(M+H)<sup>+</sup>]: 349.0023; Found: 349.0023.

### 3-chloro-4'-methyl-7-acetoxyflavone (2al)

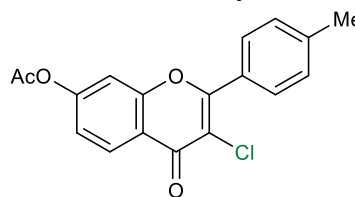

76.7 mg, 78% yield, white solid, m.p. 172-174 °C, <sup>1</sup>H NMR (400 MHz, CDCl<sub>3</sub>)  $\delta$  8.29 (d, *J* = 8.8 Hz, 1H), 7.80 (d, *J* = 8.4 Hz, 2H), 7.35 (d, *J* = 2.0 Hz, 1H), 7.34 (d, *J* = 8.0 Hz, 2H), 7.19 (dd, *J* = 8.8, 2.0 Hz, 1H), 2.45 (s, 3H), 2.36 (s, 3H); <sup>13</sup>C NMR (101 MHz, CDCl<sub>3</sub>)  $\delta$  172.6,

168.6, 161.1, 156.0, 154.9, 142.2, 129.3, 128.5, 127.9, 120.1, 120.0, 117.8, 111.0, 21.8, 21.3; HRMS (ESI) calcd for  $C_{18}H_{14}ClO_4$  [(M+H)<sup>+</sup>]: 329.0581; Found: 329.0588.

### 3-chloro-7-acetoxy-8-methylflavone (2am)

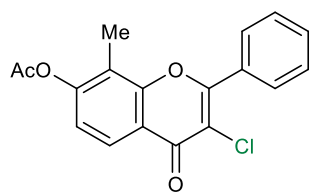

81.7 mg, 83% yield, white solid, m.p. 123-125 °C, <sup>1</sup>H NMR (400 MHz, CDCl<sub>3</sub>)  $\delta$  8.17 (dd, *J* = 8.8, 0.8 Hz, 1H), 7.93-7.91 (m, 2H), 7.60-7.53 (m, 3H), 7.17 (d, *J* = 8.8 Hz, 1H), 2.39 (s, 3H), 2.32 (s, 3H); <sup>13</sup>C NMR (101 MHz, CDCl<sub>3</sub>)  $\delta$  173.0,

168.6, 160.6, 154.8, 153.3, 131.6, 131.5, 129.3, 128.7, 128.7, 124.6, 120.5, 120.4, 120.2, 118.1, 20.9, 9.5; HRMS (ESI) calcd for  $C_{18}H_{14}ClO_4$  [(M+H)<sup>+</sup>]: 329.0575; Found: 329.0588.

### 3-chloro-7, 8-di-acetoxyflavone (2an)

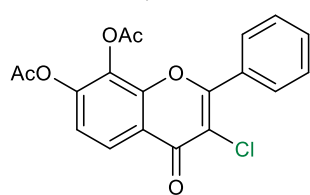

99.3 mg, 89% yield, white solid, m.p. 132-134 °C, <sup>1</sup>H NMR (400 MHz, CDCl<sub>3</sub>)  $\delta$  8.18 (d, *J* = 8.8 Hz, 1H), 7.85 (dd, *J* = 7.6, 2.0 Hz, 2H), 7.58-7.51 (m, 3H), 7.29 (d, *J* = 8.8 Hz, 1H), 2.36 (s, 3H), 2.35 (s, 3H); <sup>13</sup>C NMR (101 MHz, CDCl<sub>3</sub>)  $\delta$  172.1, 167.6, 167.3, 160.5, 148.8, 146.9, 131.6, 131.5, 131.2,

129.3, 128.6, 124.0, 121.1, 120.8, 118.4, 20.8, 20.3; HRMS (ESI) calcd for  $C_{19}H_{14}ClO_6$  [(M+H)<sup>+</sup>]: 373.0479; Found: 373.0482.

### 3-chloro-5, 7-di-O-acetylchrysin (2ao)

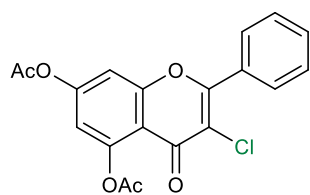

92.6 mg, 83% yield, white solid, m.p. 148-150 °C, <sup>1</sup>H NMR (400 MHz, CDCl<sub>3</sub>)  $\delta$  7.87-7.85 (m, 2H), 7.57-7.52 (m, 3H), 7.31 (d, *J* = 2.0 Hz, 1H), 6.90 (d, *J* = 2.0 Hz, 1H), 2.48 (s, 3H), 2.34 (s, 3H); <sup>13</sup>C NMR (101 MHz, CDCl<sub>3</sub>)  $\delta$  171.1, 169.6, 168.0, 160.1, 157.0, 154.4, 150.4, 131.6, 131.0, 129.3,

128.7, 128.6, 125.5, 118.8, 114.3, 113.6, 109.0, 21.3, 21.2; HRMS (ESI) calcd for  $C_{19}H_{14}ClO_6$  [(M+H)<sup>+</sup>]: 373.0479; Found: 373.0482. The spectroscopic data coincide with the previous report.<sup>4</sup>

### 3-chloro-5, 7-di-*O*-acetylacacetin (2ap)

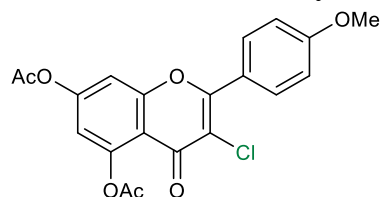

90.4 mg, 75% yield, white solid, m.p. 167-169 °C, <sup>1</sup>H NMR (400 MHz, CDCl<sub>3</sub>) δ 7.88 (d, *J* = 8.8 Hz, 2H), 7.30 (d, *J* = 2.0 Hz, 1H), 7.02 (d, *J* = 8.8 Hz, 2H), 6.88 (d, *J* = 2.4 Hz, 1H), 3.89 (s, 3H), 2.47 (s, 3H), 2.34 (s, 3H); <sup>13</sup>C NMR (101 MHz, CDCl<sub>3</sub>) δ 171.1, 169.6, 168.1, 162.1, 159.8, 156.9, 154.3, 150.4, 131.1, 123.1, 117.8, 114.2, 114.0, 113.5, 108.9, 55.6, 21.3, 21.2; HRMS (ESI) calcd for C<sub>20</sub>H<sub>16</sub>ClO<sub>7</sub> [(M+H)<sup>+</sup>]: 403.0579; Found: 403.0567.

### 3-chloro-3', 5, 7-tri-*O*-acetylapienin (2aq)

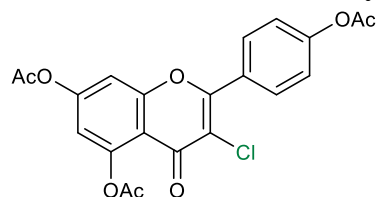

98.0 mg, 76% yield, white solid, m.p. 142-144 °C, <sup>1</sup>H NMR (400 MHz, CDCl<sub>3</sub>) δ 7.89 (d, *J* = 8.8 Hz, 2H), 7.25 (d, *J* = 8.8 Hz, 2H), 7.24 (d, *J* = 2.0 Hz, 1H), 6.88 (d, *J* = 2.0 Hz, 1H), 2.45 (s, 3H), 2.33 (d, *J* = 2.0 Hz, 6H); <sup>13</sup>C NMR (101 MHz, CDCl<sub>3</sub>) δ 171.0, 169.6, 169.1, 168.0, 159.1, 156.9, 154.5, 152.9, 150.4, 130.8, 128.5, 121.9, 118.8, 114.4, 113.6, 109.0, 21.4, 21.3, 21.2; HRMS (ESI) calcd for C<sub>21</sub>H<sub>16</sub>ClO<sub>8</sub> [(M+H)<sup>+</sup>]: 431.0528; Found: 431.0520.

### 3-chloro-3', 4', 5, 7-tetra-*O*-acetylfluteolin (2ar)

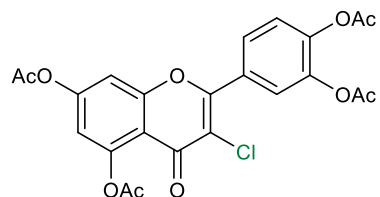

118.6 mg, 81% yield, white solid, m.p. 169-170 °C, <sup>1</sup>H NMR (400 MHz, CDCl<sub>3</sub>) δ 7.83 (dd, *J* = 8.4, 2.0 Hz, 1H), 7.76 (d, *J* = 2.0 Hz, 1H), 7.38 (d, *J* = 8.8 Hz, 1H), 7.30 (d, *J* = 2.0 Hz, 1H), 6.91 (d, *J* = 2.4 Hz, 1H), 2.47 (s, 3H), 2.35 (s, 6H), 2.34 (s, 3H); <sup>13</sup>C NMR (101 MHz, CDCl<sub>3</sub>) δ 170.8, 169.5, 168.1, 168.0, 167.9, 157.9, 156.8, 154.5, 150.4, 144.6, 142.1, 129.2, 127.8, 124.8, 123.8, 119.0, 114.5, 113.5, 109.0, 21.3, 21.2, 20.8, 20.7; HRMS (ESI) calcd for C<sub>23</sub>H<sub>18</sub>ClO<sub>10</sub> [(M+H)<sup>+</sup>]: 489.0588; Found: 489.0614.

### 3-chlorotangeretin (2as)

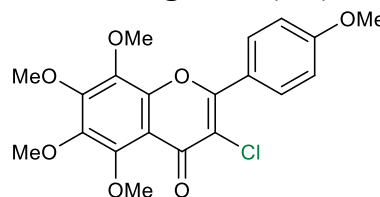

48.7 mg, 40% yield, white solid, m.p. 124-126 °C, <sup>1</sup>H NMR (400 MHz, CDCl<sub>3</sub>) δ 7.96 (d, *J* = 8.8 Hz, 2H), 7.04 (d, *J* = 8.8 Hz, 2H), 4.09 (s, 3H), 3.96 (s, 3H), 3.95 (s, 3H), 3.94 (s, 3H), 3.90 (s, 3H); <sup>13</sup>C NMR (101 MHz, CDCl<sub>3</sub>) δ 171.6, 161.9, 158.4, 151.9, 148.4, 147.1, 144.6, 137.8, 131.1, 123.7, 117.3, 114.0, 113.5, 62.5, 62.2, 62.0, 61.8, 55.6; HRMS (ESI) calcd for C<sub>20</sub>H<sub>20</sub>ClO<sub>7</sub> [(M+H)<sup>+</sup>]: 407.0898; Found: 407.0910.

### 3-chloro-6-fluoroflavone (2at)

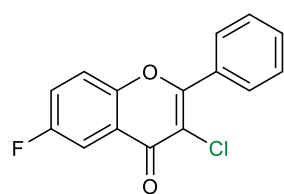

67.4 mg, 82% yield, white solid, m.p. 185-187 °C, <sup>1</sup>H NMR (400 MHz, CDCl<sub>3</sub>) δ 7.93-7.89 (m, 3H), 7.60-7.53 (m, 4H), 7.47-7.42 (m, 1H); <sup>13</sup>C NMR (101 MHz, CDCl<sub>3</sub>) δ 172.5 (d, *J*<sub>CF</sub> = 2.5 Hz), 161.0, 159.8 (d, *J*<sub>CF</sub> = 248.7 Hz), 158.6, 151.9 (d, *J*<sub>CF</sub> = 1.8 Hz), 131.6, 131.3, 129.3, 128.6, 123.5 (d, *J*<sub>CF</sub> = 7.8 Hz), 122.6 (d, *J*<sub>CF</sub> = 25.6 Hz), 120.4 (d, *J*<sub>CF</sub> = 8.3 Hz), 117.6, 111.2 (d, *J*<sub>CF</sub> = 24.1 Hz); <sup>19</sup>F NMR (377 MHz, CDCl<sub>3</sub>) δ -114.0; HRMS (ESI) calcd for C<sub>15</sub>H<sub>9</sub>ClFO<sub>2</sub> [(M+H)<sup>+</sup>]: 275.0270; Found: 275.0267.

### 3-chloro-4'-nitro-7-acetoxyflavone (2au)

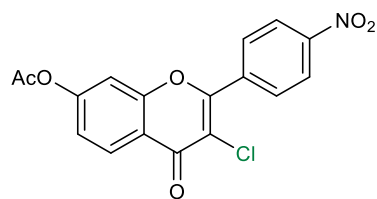

79.7 mg, 74% yield, white solid, m.p. 206-208 °C, <sup>1</sup>H NMR (400 MHz, CDCl<sub>3</sub>) δ 8.41 (d, *J* = 8.8 Hz, 2H), 8.31 (d, *J* = 8.8 Hz, 1H), 8.11 (d, *J* = 8.8 Hz, 2H), 7.41 (d, *J* = 2.0 Hz, 1H), 7.25 (dd, *J* = 8.8, 2.0 Hz, 1H), 2.38 (s, 3H); <sup>13</sup>C NMR (101 MHz, CDCl<sub>3</sub>) δ 172.0, 168.5, 158.3, 156.0, 155.3, 149.2, 137.1, 130.6, 128.0, 123.8, 120.6, 120.0, 119.4, 111.1, 21.3; HRMS (ESI) calcd for C<sub>17</sub>H<sub>11</sub>ClNO<sub>6</sub> [(M+H)<sup>+</sup>]: 360.0275; Found: 360.0281.

### 3-chloro-3', 4, 2'', 3'', 4'', 2''', 3''', 4'''-Oct-O-acetyldiosmin (2av)

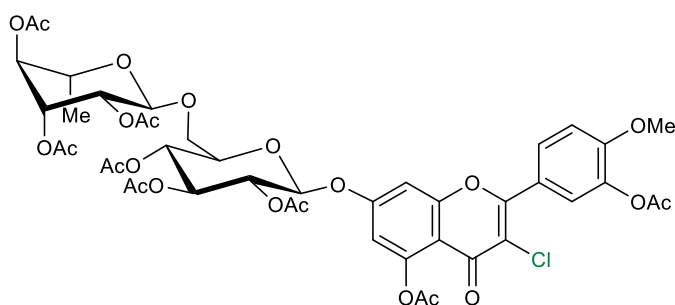

223.0 mg, 76% yield, white solid, m.p. 125-127 °C, <sup>1</sup>H NMR (400 MHz, CDCl<sub>3</sub>) δ 7.85 (dd, *J* = 8.8, 2.4 Hz, 1H), 7.65 (d, *J* = 2.4 Hz, 1H), 7.11 (d, *J* = 8.8 Hz, 1H), 6.92 (d, *J* = 2.4 Hz, 1H), 6.71 (d, *J* = 2.4 Hz, 1H), 5.36-5.26 (m, 3H), 5.21-5.15 (m, 3H), 5.04-4.98 (m, 1H), 4.70 (d, *J* = 1.2 Hz, 1H), 3.98 (ddd, *J* = 8.4, 7.2, 2.8 Hz, 1H), 3.93 (s, 3H), 3.85-3.78 (m, 2H), 3.67 (dd, *J* = 12.0, 5.6 Hz, 1H), 2.46 (s, 3H), 2.37 (s, 3H), 2.09 (s, 3H), 2.07 (s, 3H), 2.05 (s, 3H), 2.04 (s, 3H), 2.03 (s, 3H), 1.94 (s, 3H), 1.14 (d, *J* = 6.4 Hz, 3H); <sup>13</sup>C NMR (101 MHz, CDCl<sub>3</sub>) δ 170.9, 170.3, 170.1, 169.9, 169.7, 169.5, 169.3, 168.9, 160.2, 158.5, 157.6, 153.7, 150.9, 139.5, 128.8, 124.0, 123.4, 117.9, 111.9, 111.4, 109.9, 101.7, 98.1, 97.7, 73.7, 72.4, 70.9, 70.8, 69.3, 69.0, 68.6, 66.8, 66.1, 56.2, 21.2, 20.9, 20.8, 20.7 (×2), 17.4; HRMS (ESI) calcd for C<sub>44</sub>H<sub>48</sub>ClO<sub>23</sub> [(M+H)<sup>+</sup>]: 979.2269; Found: 979.2280.

## 4. Bromination of flavones

General procedure: In a sealed tube, flavone (0.3 mmol, 1 equiv.), PhI(TFA)<sub>2</sub> (0.45 mmol, 1.5 equiv.), CH<sub>2</sub>Br<sub>2</sub> (3 mL) was added and heated at 80 °C until the starting material was consumed, which was monitored by TLC. After completion, the mixture was washed by water. The organic layer was dried by anhydrous Na<sub>2</sub>SO<sub>4</sub>, then it was subjected to column chromatography and the brominated product was obtained as pure solid. It's noteworthy that PhI(OAc)<sub>2</sub> (0.9 mmol, 3.0 equiv.) instead of PhI(TFA)<sub>2</sub> (0.45 mmol, 1.5 equiv.) are employed in the synthesis of compounds **2bj-2bo**.

### 3-bromo-7-((5,5-dimethyl-2-oxido-1,3,2-dioxaphosphinan-2-yl)oxy)-2-phenyl-4H-chromen-4-one (2ba)

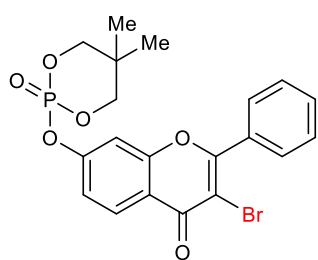

118.3 mg, 85% yield, white solid, m.p. 194-196 °C, <sup>1</sup>H NMR (400 MHz, CDCl<sub>3</sub>) δ 8.30 (dd, *J* = 8.8, 0.8 Hz, 1H), 7.86-7.83 (m, 2H), 7.57-7.51 (m, 4H), 7.30 (ddd, *J* = 8.8, 2.4, 0.8 Hz, 1H), 4.27 (dd, *J* = 11.2, 2.0 Hz, 2H), 4.04 (ddt, *J* = 22.8, 11.2, 1.6 Hz, 2H), 1.36 (s, 3H), 0.94 (s, 3H); <sup>13</sup>C NMR (101 MHz, CDCl<sub>3</sub>) δ 172.5, 162.3, 156.5, 154.6 (d, *J*<sub>CP</sub> = 6.2 Hz), 132.6, 131.4, 129.4, 128.7 (d, *J*<sub>CP</sub> = 2.6 Hz), 128.5, 119.0, 118.3 (d, *J*<sub>CP</sub> = 6.8 Hz), 109.4, 108.5 (d, *J*<sub>CP</sub> = 4.8 Hz), 78.9 (d, *J*<sub>CP</sub> = 7.2 Hz), 32.4 (d, *J*<sub>CP</sub> = 6.2 Hz), 21.8, 20.3; <sup>31</sup>P NMR (162 MHz, CDCl<sub>3</sub>) δ -14.9; HRMS (ESI) calcd for

C<sub>20</sub>H<sub>19</sub>BrO<sub>6</sub>P [(M+H)<sup>+</sup>]: 465.0097; Found: 465.0092.

**3-bromo-4-oxo-2-phenyl-4H-chromen-7-yl dimethylcarbamate (2bb)**

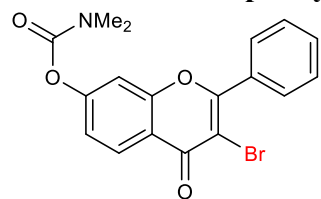

90.5 mg, 78% yield, white solid, m.p. 103-105 °C, <sup>1</sup>H NMR (400 MHz, CDCl<sub>3</sub>) δ 8.29 (d, *J* = 8.8 Hz, 1H), 7.84 (dt, *J* = 7.6, 1.6 Hz, 2H), 7.57-7.51 (m, 3H), 7.39 (d, *J* = 2.0 Hz, 1H), 7.23 (dd, *J* = 8.8, 2.0 Hz, 1H), 3.14 (s, 3H), 3.05 (s, 3H); <sup>13</sup>C NMR (101 MHz, CDCl<sub>3</sub>) δ 172.7, 162.2, 156.3, 156.0, 153.6,

132.9, 131.3, 129.5, 128.5, 127.8, 120.3, 119.1, 110.7, 109.4, 37.0, 36.7; HRMS (ESI) calcd for C<sub>18</sub>H<sub>15</sub>BrNO<sub>4</sub> [(M+H)<sup>+</sup>]: 388.0184; Found: 388.0182.

**3-bromoflavone (2bc)**

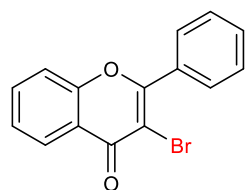

72.9 mg, 81% yield, white solid, m.p. 111-113 °C, <sup>1</sup>H NMR (400 MHz, CDCl<sub>3</sub>) δ 8.31 (dd, *J* = 8.0, 1.6 Hz, 1H), 7.88-7.85 (m, 2H), 7.73 (ddd, *J* = 8.8, 7.2, 1.6 Hz, 1H), 7.58-7.51 (m, 4H), 7.8 (t, *J* = 7.2 Hz, 1H); <sup>13</sup>C NMR (101 MHz, CDCl<sub>3</sub>) δ 173.3, 162.2, 155.8, 134.3, 133.0, 131.3, 129.5, 128.5, 128.4, 126.7, 125.9, 121.9,

118.0, 109.4; HRMS (ESI) calcd for C<sub>15</sub>H<sub>10</sub>BrO<sub>2</sub> [(M+H)<sup>+</sup>]: 300.9864; Found: 300.9860. The spectroscopic data coincide with the previous report.<sup>5</sup>

**3-bromo-4'-acetoxyflavone (2bd)**

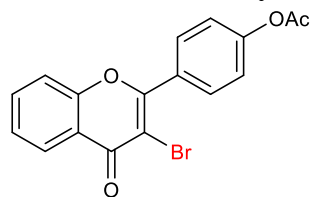

70.8 mg, 66% yield, white solid, m.p. 182-184 °C, <sup>1</sup>H NMR (400 MHz, CDCl<sub>3</sub>) δ 8.10 (dd, *J* = 8.0, 1.6 Hz, 1H), 7.72 (d, *J* = 8.8 Hz, 2H), 7.54 (ddd, *J* = 8.8, 7.2, 1.6 Hz, 1H), 7.32-7.26 (m, 2H), 7.09 (d, *J* = 8.8 Hz, 2H), 2.17 (s, 3H); <sup>13</sup>C NMR (101 MHz, CDCl<sub>3</sub>) δ 173.2, 169.1, 161.2, 155.7, 152.7, 134.4,

131.0, 130.4, 126.7, 126.0, 121.8, 121.8, 118.0, 109.4, 21.3; HRMS (ESI) calcd for C<sub>17</sub>H<sub>12</sub>BrO<sub>4</sub> [(M+H)<sup>+</sup>]: 358.9919; Found: 358.9926.

**3-bromo-6-acetoxyflavone (2be)**

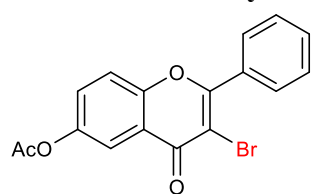

95.5 mg, 89% yield, white solid, m.p. 187-189 °C, <sup>1</sup>H NMR (400 MHz, CDCl<sub>3</sub>) δ 7.98 (d, *J* = 2.8 Hz, 1H), 7.91-7.83 (m, 2H), 7.58-7.53 (m, 4H), 7.47 (dd, *J* = 8.8, 2.8 Hz, 1H), 2.35 (s, 3H); <sup>13</sup>C NMR (101 MHz, CDCl<sub>3</sub>) δ 172.6, 169.3, 162.3, 153.2, 148.0, 132.7, 131.4, 129.4, 128.6, 128.4, 122.5, 119.4,

118.5, 109.0, 21.1; HRMS (ESI) calcd for C<sub>17</sub>H<sub>12</sub>BrO<sub>4</sub> [(M+H)<sup>+</sup>]: 358.9919; Found: 358.9926.

**3-bromo-7-acetoxyflavone (2bf)**

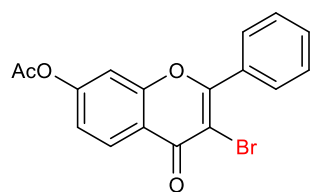

85.9 mg, 80% yield. White solid, m.p. 154-156 °C, <sup>1</sup>H NMR (400 MHz, CDCl<sub>3</sub>) δ 8.32 (d, *J* = 8.8 Hz, 1H), 7.86-7.83 (m, 2H), 7.59-7.52 (m, 3H), 7.36 (d, *J* = 2.0 Hz, 1H), 7.21 (dd, *J* = 8.8, 2.0 Hz, 1H), 2.37 (s, 3H); <sup>13</sup>C NMR (101 MHz, CDCl<sub>3</sub>) δ 172.7, 168.6, 162.4, 156.2, 155.0, 132.7, 131.4, 129.4,

128.5, 128.1, 120.2, 119.6, 111.0, 109.5, 21.3; HRMS (ESI) calcd for C<sub>17</sub>H<sub>12</sub>BrO<sub>4</sub> [(M+H)<sup>+</sup>]: 358.9919; Found: 358.9905.

**3-bromo-4'-chloro-7-acetoxyflavone (2bg)**



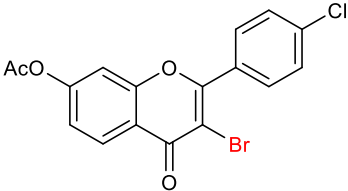 96.4 mg, 82% yield, white solid, m.p. 168-170 °C, <sup>1</sup>H NMR (400 MHz, CDCl<sub>3</sub>) δ 8.29 (d, *J* = 8.8 Hz, 1H), 7.81 (d, *J* = 8.8 Hz, 2H), 7.51 (d, *J* = 8.8 Hz, 2H), 7.35 (d, *J* = 2.0 Hz, 1H), 7.21 (dd, *J* = 8.8, 2.0 Hz, 1H), 2.36 (s, 3H); <sup>13</sup>C NMR (101 MHz, CDCl<sub>3</sub>) δ 172.3, 168.5, 161.0, 156.0, 155.0, 137.6, 131.0, 130.8, 128.8, 128.1, 120.3, 119.5, 110.9, 109.6, 21.3; HRMS (ESI) calcd for C<sub>17</sub>H<sub>11</sub>BrClO<sub>4</sub> [(M+H)<sup>+</sup>]: 392.9529; Found: 392.9533.

**3-bromo-4'-methyl-7-acetoxyflavone (2bh)**

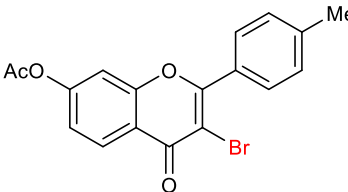 84.8 mg, 76% yield, white solid, m.p. 184-186 °C, <sup>1</sup>H NMR (400 MHz, CDCl<sub>3</sub>) δ 8.30 (d, *J* = 8.8 Hz, 1H), 7.75 (d, *J* = 8.4 Hz, 2H), 7.34 (d, *J* = 2.0 Hz, 1H), 7.33 (d, *J* = 8.0 Hz, 2H), 7.19 (dd, *J* = 8.8, 2.0 Hz, 1H), 2.45 (s, 3H), 2.35 (s, 3H); <sup>13</sup>C NMR (101 MHz, CDCl<sub>3</sub>) δ 172.7, 168.6, 162.5, 156.1, 154.9, 142.0, 129.8, 129.4, 129.2, 128.1, 120.1, 119.6, 110.9, 109.2, 21.8, 21.3; HRMS (ESI) calcd for C<sub>18</sub>H<sub>14</sub>BrO<sub>4</sub> [(M+H)<sup>+</sup>]: 373.0075; Found: 373.0087.

**7-acetoxy-8-methylflavone (2bi)**

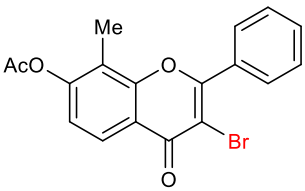 79.2 mg, 71% yield, white solid, m.p. 148-150 °C, <sup>1</sup>H NMR (400 MHz, CDCl<sub>3</sub>) δ 8.16 (d, *J* = 8.8 Hz, 1H), 7.87 (dt, *J* = 7.6, 1.6 Hz, 2H), 7.59-7.51 (m, 3H), 7.16 (d, *J* = 8.8 Hz, 1H), 2.39 (s, 3H), 2.30 (s, 3H); <sup>13</sup>C NMR (101 MHz, CDCl<sub>3</sub>) δ 173.0, 168.6, 162.0, 154.9, 153.3, 132.9, 131.3, 129.4, 128.5, 124.8, 124.7, 120.5, 120.1, 119.8, 119.7, 109.4, 20.9, 9.5; HRMS (ESI) calcd for C<sub>18</sub>H<sub>14</sub>BrO<sub>4</sub> [(M+H)<sup>+</sup>]: 373.0075; Found: 373.0087.

**3-bromo-7, 8-diacetoxyflavone (2bj)**

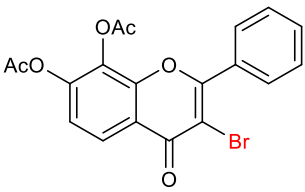 89.8 mg, 72% yield, white solid, m.p. 142-143 °C, <sup>1</sup>H NMR (400 MHz, CDCl<sub>3</sub>) δ 8.18 (d, *J* = 8.8 Hz, 1H), 7.82-7.80 (m, 2H), 7.58-7.50 (m, 3H), 7.29 (d, *J* = 8.8 Hz, 1H), 2.36 (s, 3H), 2.33 (s, 3H); <sup>13</sup>C NMR (101 MHz, CDCl<sub>3</sub>) δ 172.2, 167.6, 167.3, 161.7, 148.9, 146.9, 132.5, 131.5, 131.4, 129.4, 128.5, 124.1, 120.8, 120.5, 109.6, 20.7, 20.3; HRMS (ESI) calcd for C<sub>19</sub>H<sub>14</sub>BrO<sub>6</sub> [(M+H)<sup>+</sup>]: 416.9974; Found: 416.9974.

**3-bromo-5, 7-di-O-acetylchrysin (2bk)**

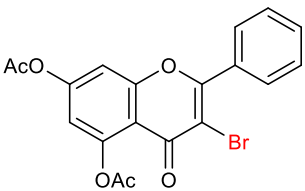 74.8 mg, 60% yield, white solid, m.p. 151-153 °C, <sup>1</sup>H NMR (400 MHz, CDCl<sub>3</sub>) δ 7.80 (dd, *J* = 8.0, 2.0 Hz, 2H), 7.58-7.50 (m, 3H), 7.29 (d, *J* = 2.4 Hz, 1H), 6.90 (d, *J* = 2.4 Hz, 1H), 2.48 (s, 3H), 2.34 (s, 3H); <sup>13</sup>C NMR (101 MHz, CDCl<sub>3</sub>) δ 171.1, 169.6, 168.0, 161.5, 157.2, 154.4, 150.4, 132.4, 131.5, 129.4, 128.5, 114.4, 113.1, 110.4, 109.0, 21.3, 21.2; HRMS (ESI) calcd for C<sub>19</sub>H<sub>14</sub>BrO<sub>6</sub> [(M+H)<sup>+</sup>]: 416.9968; Found: 416.9974.

**3-bromo-5, 7-di-O-acetylacacetin (2bl)**

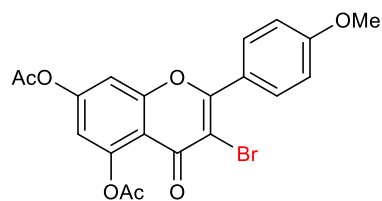

95.0 mg, 71% yield, white solid, m.p. 173-175 °C, <sup>1</sup>H NMR (400 MHz, CDCl<sub>3</sub>) δ 7.81 (d, *J* = 8.8 Hz, 2H), 7.27 (d, *J* = 2.4 Hz, 1H), 7.00 (d, *J* = 8.8 Hz, 2H), 6.88 (d, *J* = 2.4 Hz, 1H), 3.88 (s, 3H), 2.46 (s, 3H), 2.32 (s, 3H); <sup>13</sup>C NMR (101 MHz, CDCl<sub>3</sub>) δ 171.1, 169.5, 168.0, 162.0, 161.2, 157.0, 154.2, 150.3, 131.2, 124.4, 114.2, 113.8, 113.0, 109.5, 108.8, 55.6, 21.3, 21.2; HRMS (ESI) calcd for C<sub>20</sub>H<sub>16</sub>BrO<sub>7</sub> [(M+H)<sup>+</sup>]: 447.0079; Found: 447.0073.

### 3-bromo-4', 5, 7-tri-*O*-acetylapienin (2bm)

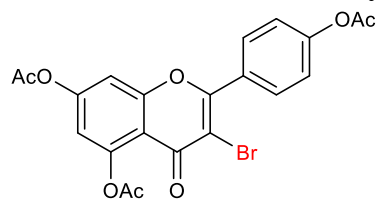

89.5 mg, 63% yield, white solid, m.p. 174-176 °C, <sup>1</sup>H NMR (400 MHz, CDCl<sub>3</sub>) δ 7.86 (d, *J* = 8.8 Hz, 2H), 7.28 (d, *J* = 2.0 Hz, 1H), 7.27 (d, *J* = 8.8 Hz, 2H), 6.91 (d, *J* = 2.4 Hz, 1H), 2.47 (s, 3H), 2.35 (s, 3H), 2.34 (s, 3H); <sup>13</sup>C NMR (101 MHz, CDCl<sub>3</sub>) δ 170.9, 169.5, 169.0, 168.0, 160.5, 157.0, 154.4, 152.8, 150.3, 130.9, 129.7, 121.8, 114.4, 113.0, 110.4, 108.9, 21.3; HRMS (ESI) calcd for C<sub>21</sub>H<sub>16</sub>BrO<sub>8</sub> [(M+H)<sup>+</sup>]: 475.0023; Found: 475.0013.

### 3-bromo-3', 4', 5, 7-tetra-*O*-acetyluteolin (2bn)

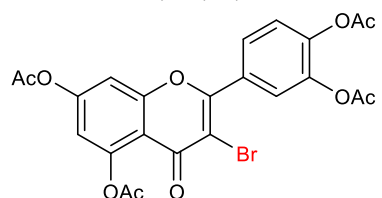

86.2 mg, 54% yield, white solid, m.p. 183-185 °C, <sup>1</sup>H NMR (400 MHz, CDCl<sub>3</sub>) δ 7.77 (dd, *J* = 8.8, 2.0 Hz, 1H), 7.72 (d, *J* = 2.0 Hz, 1H), 7.37 (d, *J* = 8.4 Hz, 1H), 7.28 (t, *J* = 2.4 Hz, 1H), 6.91 (d, *J* = 2.4 Hz, 1H), 2.47 (s, 3H), 2.34 (s, 9H); <sup>13</sup>C NMR (101 MHz, CDCl<sub>3</sub>) δ 170.8, 169.5, 168.0, 167.9 (×2), 159.3, 157.0, 154.5, 150.4, 144.5, 142.0, 130.5, 127.9, 125.0, 123.7, 114.5, 113.0, 110.6, 108.9, 21.3, 21.2, 20.8, 20.7; HRMS (ESI) calcd for C<sub>23</sub>H<sub>18</sub>BrO<sub>10</sub> [(M+H)<sup>+</sup>]: 533.0083; Found: 533.0106.

### 3-bromotangeretin (2bo)

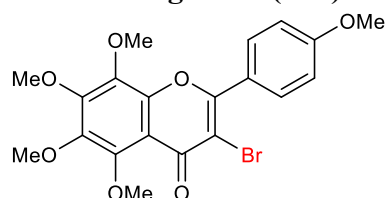

48.6 mg, 36% yield, white solid, m.p. 140-142 °C, <sup>1</sup>H NMR (400 MHz, CDCl<sub>3</sub>) δ 7.91 (d, *J* = 8.8 Hz, 2H), 7.03 (d, *J* = 8.8 Hz, 2H), 4.09 (s, 3H), 3.96 (s, 3H), 3.94 (s, 3H), 3.93 (s, 3H), 3.90 (s, 3H); <sup>13</sup>C NMR (101 MHz, CDCl<sub>3</sub>) δ 171.6, 161.8, 159.9, 151.8, 148.4, 147.2, 144.7, 137.7, 131.3, 124.9, 113.8, 113.0, 109.2, 62.5, 62.2, 62.0, 61.8, 55.6; HRMS (ESI) calcd for C<sub>20</sub>H<sub>20</sub>BrO<sub>7</sub> [(M+H)<sup>+</sup>]: 451.0392; Found: 451.0425.

### 3-bromo-6-fluoroflavone (2bp)

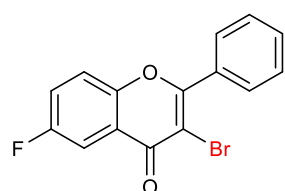

62.9 mg, 66% yield, white solid, m.p. 194-196 °C, <sup>1</sup>H NMR (400 MHz, CDCl<sub>3</sub>) δ 7.91 (dd, *J* = 8.0, 3.2 Hz, 1H), 7.85 (dd, *J* = 8.0, 2.0 Hz, 2H), 7.59-7.51 (m, 4H), 7.44 (ddd, *J* = 9.2, 7.6, 3.2 Hz, 1H); <sup>13</sup>C NMR (101 MHz, CDCl<sub>3</sub>) δ 172.6 (d, *J*<sub>CF</sub> = 2.4 Hz), 162.4, 159.9 (d, *J*<sub>CF</sub> = 248.8 Hz), 152.0 (d, *J*<sub>CF</sub> = 1.8 Hz), 132.7, 131.4, 129.4, 128.5, 122.9 (d, *J*<sub>CF</sub> = 7.7 Hz), 122.8, 122.5, 120.2 (d, *J*<sub>CF</sub> = 8.2 Hz), 111.3 (d, *J*<sub>CF</sub> = 24.1 Hz), 108.8 (d, *J*<sub>CF</sub> = 1.4 Hz); <sup>19</sup>F NMR (377 MHz, CDCl<sub>3</sub>) δ -114.1; HRMS (ESI) calcd for C<sub>15</sub>H<sub>9</sub>BrFO<sub>2</sub> [(M+H)<sup>+</sup>]: 318.9764; Found: 318.9782.

### 3-bromo-4'-nitro-7-acetylflavone (2bq)

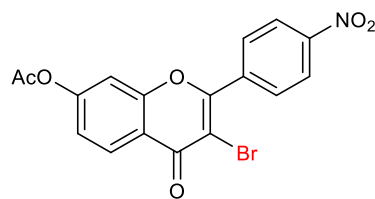

93.0 mg, 77% yield, white solid, m.p. 208-210 °C, <sup>1</sup>H NMR (400 MHz, CDCl<sub>3</sub>) δ 8.40 (d, *J* = 8.4 Hz, 2H), 8.31 (d, *J* = 8.8 Hz, 1H), 8.05 (d, *J* = 8.4 Hz, 2H), 7.38 (d, *J* = 2.0 Hz, 1H), 7.25 (dd, *J* = 8.8, 2.0 Hz, 1H), 2.38 (s, 3H); <sup>13</sup>C NMR (101 MHz, CDCl<sub>3</sub>) δ 172.1, 168.5, 159.7, 156.1, 155.3, 149.1, 138.4, 130.7, 128.2, 123.7, 120.6, 119.5, 111.0, 110.7, 21.3; HRMS (ESI) calcd for C<sub>17</sub>H<sub>11</sub>BrNO<sub>6</sub> [(M+H)<sup>+</sup>]: 403.9770; Found: 403.9771.

## 5. Iodination of flavones

General procedure: In a sealed tube, flavone (0.3 mmol, 1 equiv.), PhI(TFA)<sub>2</sub> (0.6 mmol, 2.0 equiv.), CH<sub>2</sub>I<sub>2</sub> (3 mL) was added and heated at 80 °C until the starting material was consumed, which was monitored by TLC. After completion, the mixture was washed by water. The organic layer was dried by anhydrous Na<sub>2</sub>SO<sub>4</sub>, then it was subjected to column chromatography and the iodinated product was obtained as pure solid. It's noteworthy that PhI(OAc)<sub>2</sub> (0.9 mmol, 3.0 equiv.) instead of PhI(TFA)<sub>2</sub> (0.45 mmol, 1.5 equiv.) are employed in the synthesis of compounds **2ci-2cl**.

### 7-((5,5-dimethyl-2-oxido-1,3,2-dioxaphosphinan-2-yl)oxy)-3-iodo-2-phenyl-4H-chromen-4-one (**2ca**)

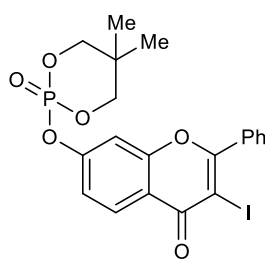

126.0 mg, 82% yield, white solid, m.p. 121-123 °C, <sup>1</sup>H NMR (400 MHz, CDCl<sub>3</sub>) δ 8.28 (d, *J* = 8.8 Hz, 1H), 7.79-7.77 (m, 2H), 7.57-7.50 (m, 4H), 7.30 (dd, *J* = 8.8, 2.4 Hz, 1H), 4.28 (d, *J* = 10.8 Hz, 2H), 4.04 (dd, *J* = 22.8, 11.2 Hz, 2H), 1.36 (s, 3H), 0.94 (s, 3H); <sup>13</sup>C NMR (101 MHz, CDCl<sub>3</sub>) δ 173.8, 164.9, 156.7, 154.6 (d, *J*<sub>CP</sub> = 6.1 Hz), 134.8, 131.3, 129.6, 129.3, 129.0, 128.5, 128.4, 118.4 (d, *J*<sub>CP</sub> = 6.6 Hz), 117.2, 108.3 (d, *J*<sub>CP</sub> = 4.8 Hz), 88.5, 78.9 (d, *J*<sub>CP</sub> = 7.3 Hz), 32.4 (d, *J*<sub>CP</sub> = 6.3 Hz), 21.8, 20.3; <sup>31</sup>P NMR (162 MHz, CDCl<sub>3</sub>) δ -14.8; HRMS (ESI) calcd for C<sub>20</sub>H<sub>19</sub>IO<sub>6</sub>P [(M+H)<sup>+</sup>]: 512.9958; Found: 512.9955.

### 3-iodo-4-oxo-2-phenyl-4H-chromen-7-yl dimethylcarbamate (**2cb**)

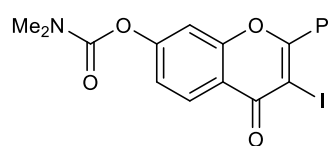

96.6 mg, 74% yield, white solid, m.p. 102-104 °C, <sup>1</sup>H NMR (400 MHz, CDCl<sub>3</sub>) δ 8.17 (dt, *J* = 8.8, 2.0 Hz, 1H), 7.70-7.67 (m, 2H), 7.48-7.41 (m, 3H), 7.27 (d, *J* = 2.0 Hz, 1H), 7.13 (dt, *J* = 8.8, 2.0 Hz, 1H), 3.04 (s, 3H), 2.95 (s, 3H); <sup>13</sup>C NMR (101 MHz, CDCl<sub>3</sub>) δ 174.1, 164.8, 156.4, 155.9, 153.6, 134.9, 131.2, 129.5, 128.3, 127.9, 120.3, 117.1, 110.4, 88.4, 36.9, 36.7; HRMS (ESI) calcd for C<sub>18</sub>H<sub>15</sub>INO<sub>4</sub> [(M+H)<sup>+</sup>]: 436.0040; Found: 436.0050.

### 3-iodoflavone (**2cc**)

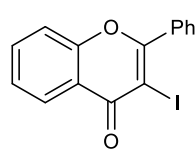

74.0 mg, 71% yield, white solid, <sup>1</sup>H NMR (400 MHz, CDCl<sub>3</sub>) δ 8.17 (dd, *J* = 8.0, 1.6 Hz, 1H), 7.71-7.67 (m, 2H), 7.61 (ddd, *J* = 9.6, 8.0, 2.0 Hz, 1H), 7.50-7.33 (m, 5H); <sup>13</sup>C NMR (101 MHz, CDCl<sub>3</sub>) δ 174.6, 164.6, 155.9, 135.1, 134.3, 131.1, 129.5, 128.3, 126.7, 125.9, 120.0, 117.7, 88.4; HRMS (ESI) calcd for C<sub>15</sub>H<sub>10</sub>IO<sub>2</sub> [(M+H)<sup>+</sup>]: 348.9720; Found: 348.9718. The spectroscopic data coincide with the previous report.<sup>6</sup>

### 3-iodo-4'-acetoxyflavone (**2cd**)

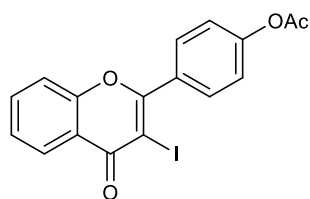

107.0 mg, 88% yield, white solid, m.p. 186-188 °C, <sup>1</sup>H NMR (400 MHz, CDCl<sub>3</sub>) δ 8.29 (dd, *J* = 8.4, 1.6 Hz, 1H), 7.84 (d, *J* = 8.4 Hz, 2H), 7.73 (ddt, *J* = 8.4, 7.2, 1.2 Hz, 1H), 7.50-7.45 (m, 2H), 7.28 (d, *J* = 8.4 Hz, 2H), 2.36 (s, 3H); <sup>13</sup>C NMR (101 MHz, CDCl<sub>3</sub>) δ 174.7, 169.2, 163.8, 156.0, 152.6, 134.4, 132.6, 131.1, 126.9, 126.1, 121.7, 120.0, 117.7, 88.6, 21.4; HRMS (ESI) calcd for C<sub>17</sub>H<sub>12</sub>IO<sub>4</sub> [(M+H)<sup>+</sup>]: 406.9775; Found: 406.9796.

### 3-iodo-6-acetoxyflavone (2ce)

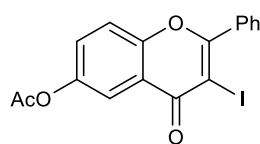

98.6 mg, 81% yield, white solid, m.p. 192-194 °C, <sup>1</sup>H NMR (400 MHz, CDCl<sub>3</sub>) δ 7.97 (d, *J* = 2.8 Hz, 1H), 7.78-7.73 (m, 2H), 7.57-7.50 (m, 4H), 7.46 (dd, *J* = 8.8, 2.8 Hz, 1H), 2.36 (s, 3H); <sup>13</sup>C NMR (101 MHz, CDCl<sub>3</sub>) δ 174.1, 169.4, 164.9, 153.5, 148.1, 135.0, 131.3, 129.6, 128.7, 128.5, 120.7, 119.2, 118.8, 87.9, 21.2; HRMS (ESI) calcd for C<sub>17</sub>H<sub>12</sub>IO<sub>4</sub> [(M+H)<sup>+</sup>]: 406.9775; Found: 406.9755.

### 3-iodo-7-acetoxyflavone (2cf)

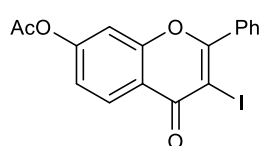

107.0 mg, 88% yield, white solid, m.p. 118-120 °C, <sup>1</sup>H NMR (400 MHz, CDCl<sub>3</sub>) δ 8.30 (d, *J* = 8.8 Hz, 1H), 7.79-7.75 (m, 2H), 7.58-7.51 (m, 3H), 7.33 (d, *J* = 2.0 Hz, 1H), 7.20 (dd, *J* = 8.8, 2.0 Hz, 1H), 2.36 (s, 3H); <sup>13</sup>C NMR (101 MHz, CDCl<sub>3</sub>) δ 174.0, 168.6, 164.9, 156.4, 155.0, 134.9, 131.3, 129.5, 128.4, 128.3, 120.3, 117.8, 110.7, 88.6, 21.3; HRMS (ESI) calcd for C<sub>17</sub>H<sub>12</sub>IO<sub>4</sub> [(M+H)<sup>+</sup>]: 406.9775; Found: 406.9755.

### 3-iodo-4'-chloro-7-acetoxyflavone (2cg)

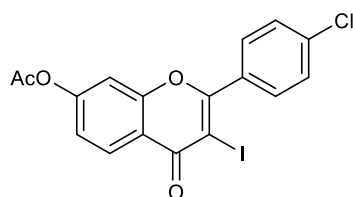

102.9 mg, 78% yield, white solid, m.p. 161-163 °C, <sup>1</sup>H NMR (400 MHz, CDCl<sub>3</sub>) δ 8.30 (dd, *J* = 8.8, 1.6 Hz, 1H), 7.76-7.72 (m, 2H), 7.53-7.50 (m, 2H), 7.34 (t, *J* = 2.0 Hz, 1H), 7.21 (dt, *J* = 8.8, 2.0 Hz, 1H), 2.37 (s, 3H); <sup>13</sup>C NMR (101 MHz, CDCl<sub>3</sub>) δ 173.8, 168.6, 163.6, 156.3, 155.0, 137.5, 133.2, 131.0, 128.8, 128.4, 120.4, 117.7, 110.7, 88.8, 21.3; HRMS (ESI) calcd for C<sub>17</sub>H<sub>11</sub>ClIO<sub>4</sub> [(M+H)<sup>+</sup>]: 440.9385; Found: 440.9391.

### 3-iodo-4'-methyl-7-acetoxyflavone (2ch)

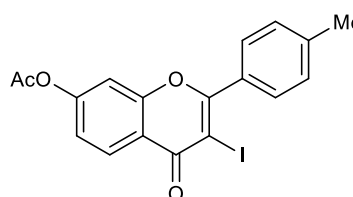

91.9 mg, 73% yield, white solid, m.p. 161-163 °C, <sup>1</sup>H NMR (400 MHz, CDCl<sub>3</sub>) δ 8.29 (d, *J* = 8.8 Hz, 1H), 7.69 (d, *J* = 8.4 Hz, 2H), 7.34 (d, *J* = 8.0 Hz, 2H), 7.33 (d, *J* = 2.0 Hz, 1H), 7.19 (dd, *J* = 8.8, 2.0 Hz, 1H), 2.47 (s, 3H), 2.36 (s, 3H); <sup>13</sup>C NMR (101 MHz, CDCl<sub>3</sub>) δ 174.0, 168.6, 165.0, 156.4, 154.9, 141.8, 132.1, 129.5, 129.1, 128.3, 120.2, 117.8, 110.7, 88.2, 21.8, 21.3; HRMS (ESI) calcd for C<sub>18</sub>H<sub>14</sub>IO<sub>4</sub> [(M+H)<sup>+</sup>]: 420.9931; Found: 420.9917.

### 3-iodo-7, 8-diacetoxyflavone (2ci)

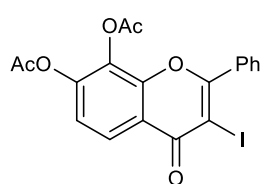

107.1 mg, 77% yield, white solid, m.p. 173-175 °C, <sup>1</sup>H NMR (400 MHz, CDCl<sub>3</sub>) δ 8.09 (d, *J* = 8.8 Hz, 1H), 7.70-7.67 (m, 2H), 7.49-7.41 (m, 3H), 7.20 (d, *J* = 8.8 Hz, 1H), 2.27 (s, 3H), 2.23 (s, 3H); <sup>13</sup>C NMR (101 MHz, CDCl<sub>3</sub>) δ 173.6, 167.6, 167.2, 164.0, 149.1, 146.8, 134.5, 131.4, 131.2, 129.6, 128.4, 124.3, 120.8, 118.6, 88.5, 20.7, 20.3; HRMS (ESI) calcd for C<sub>19</sub>H<sub>14</sub>IO<sub>6</sub> [(M+H)<sup>+</sup>]: 464.9830; Found:

464.9843.

### 3-iodo-5, 7-di-*O*-acetylchrysin (2cj)

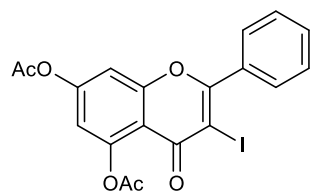

116.9 mg, 84% yield, white solid, m.p. 131-133 °C, <sup>1</sup>H NMR (400 MHz, CDCl<sub>3</sub>) δ 7.74-7.72 (m, 2H), 7.58-7.50 (m, 3H), 7.28 (d, *J* = 2.4 Hz, 1H), 6.91 (d, *J* = 2.4 Hz, 1H), 2.48 (s, 3H), 2.34 (s, 3H); <sup>13</sup>C NMR (101 MHz, CDCl<sub>3</sub>) δ 172.3, 169.6, 168.0, 164.0, 157.4, 154.3, 150.2, 134.6, 131.3, 129.5, 128.5, 114.3, 111.5, 108.7, 90.0, 21.3 (×2); HRMS (ESI) calcd for C<sub>19</sub>H<sub>14</sub>IO<sub>6</sub> [(M+H)<sup>+</sup>]: 464.9830; Found: 464.9843.

### 3-iodo-5, 7-di-*O*-acetylacacetin (2ck)

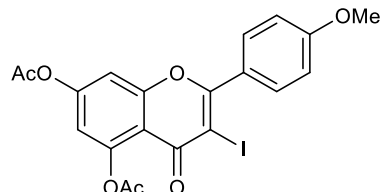

125.9 mg, 85% yield, white solid, m.p. 152-154 °C, <sup>1</sup>H NMR (400 MHz, CDCl<sub>3</sub>) δ 7.75 (d, *J* = 8.8 Hz, 2H), 7.27 (d, *J* = 2.0 Hz, 1H), 7.02 (d, *J* = 8.8 Hz, 2H), 6.89 (d, *J* = 2.0 Hz, 1H), 3.90 (s, 3H), 2.48 (s, 3H), 2.34 (s, 3H); <sup>13</sup>C NMR (101 MHz, CDCl<sub>3</sub>) δ 172.4, 169.6, 168.0, 163.8, 161.9, 157.3, 154.2, 150.2, 131.4, 126.6, 114.2, 113.7, 111.4, 108.7, 89.2, 55.6, 21.3; HRMS (ESI) calcd for C<sub>20</sub>H<sub>16</sub>IO<sub>7</sub> [(M+H)<sup>+</sup>]: 494.9935; Found: 494.9959.

### 3-iodo-4', 5, 7-tri-*O*-acetylapienin (2cl)

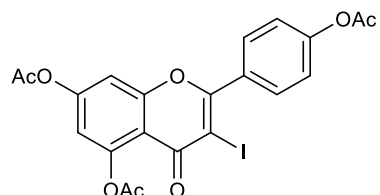

117.4 mg, 75% yield, white solid, m.p. 163-165 °C, <sup>1</sup>H NMR (400 MHz, CDCl<sub>3</sub>) δ 7.79 (d, *J* = 8.4 Hz, 2H), 7.27-7.25 (m, 3H), 6.91 (d, *J* = 2.0 Hz, 1H), 2.47 (s, 3H), 2.35 (s, 3H), 2.33 (s, 3H); <sup>13</sup>C NMR (101 MHz, CDCl<sub>3</sub>) δ 172.2, 169.5, 169.0, 168.0, 163.1, 157.3, 154.3, 152.7, 150.2, 131.9, 131.0, 121.7, 114.4, 111.4, 108.7, 90.1, 21.3, 21.2; HRMS (ESI) calcd for C<sub>21</sub>H<sub>16</sub>IO<sub>8</sub> [(M+H)<sup>+</sup>]: 522.9884; Found: 522.9902.

### 3-iodo-4'-nitro-7-acetoxyflavone (2cm)

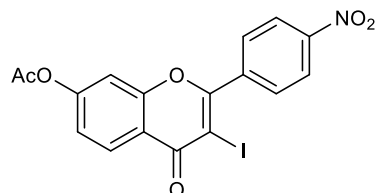

90.6 mg, 67% yield, white solid, m.p. 184-186 °C, <sup>1</sup>H NMR (400 MHz, CDCl<sub>3</sub>) δ 8.41 (d, *J* = 8.8 Hz, 2H), 8.31 (d, *J* = 8.8 Hz, 1H), 7.98 (d, *J* = 8.8 Hz, 2H), 7.36 (d, *J* = 2.0 Hz, 1H), 7.24 (dd, *J* = 8.8, 2.0 Hz, 1H), 2.37 (s, 3H); <sup>13</sup>C NMR (101 MHz, CDCl<sub>3</sub>) δ 173.4, 168.5, 162.3, 156.3, 155.3, 149.1, 140.6, 130.9, 128.5, 123.8, 120.7, 117.7, 110.8, 89.8, 21.3; HRMS (ESI) calcd for C<sub>27</sub>H<sub>11</sub>INO<sub>6</sub> [(M+H)<sup>+</sup>]: 451.9626; Found: 451.9639.

## 6. Chlorination of Chromones

General procedure: In a sealed tube, chromone (1 mmol, 1 equiv.), PhI (TFA)<sub>2</sub> (3 mmol, 3 equiv.), CHCl<sub>3</sub> (5 mL) was added and heated at 100 °C until the starting material was consumed, which was monitored by TLC. After completion, the mixture was washed by water. The organic layer was dried by anhydrous Na<sub>2</sub>SO<sub>4</sub>, then it was subjected to column chromatography and the chlorinated and iodinated products were obtained as pure solid.

### 3-chlorochromone (4aa)

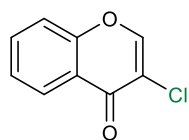

108.0 mg, 60% yield, white solid, m.p. 95-97 °C, <sup>1</sup>H NMR (400 MHz, CDCl<sub>3</sub>) δ 8.29 (dd, *J* = 8.0, 1.6 Hz, 1H), 8.18 (s, 1H), 7.73 (ddd, *J* = 8.8, 7.2, 1.6 Hz, 1H), 7.52-7.45 (m, 2H); <sup>13</sup>C NMR (101 MHz, CDCl<sub>3</sub>) δ 172.5, 156.2, 152.3, 134.3, 126.5, 126.0, 123.5, 121.0, 118.3; HRMS (ESI) calcd for C<sub>9</sub>H<sub>6</sub>ClO<sub>2</sub> [(M+H)<sup>+</sup>]: 181.0056; Found: 181.0056. The spectroscopic data coincide with the previous report.<sup>7</sup>

### 3-iodochromone (4a')

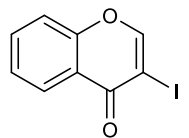

46.2 mg, 17% yield, white solid, m.p. 84-86 °C, <sup>1</sup>H NMR (400 MHz, CDCl<sub>3</sub>) δ 8.23 (s, 1H), 8.17 (dd, *J* = 8.0, 1.6 Hz, 1H), 7.64 (ddd, *J* = 9.6, 8.0, 1.6 Hz, 1H), 7.41-7.36 (m, 2H); <sup>13</sup>C NMR (101 MHz, CDCl<sub>3</sub>) δ 173.5, 157.9, 156.3, 134.2, 126.7, 126.1, 121.9, 118.1, 86.9; HRMS (ESI) calcd for C<sub>9</sub>H<sub>6</sub>IO<sub>2</sub> [(M+H)<sup>+</sup>]: 272.9412; Found: 272.9411. The spectroscopic data coincide with the previous report.<sup>8</sup>

### 3-chloro-6-methoxychromone (4ab)

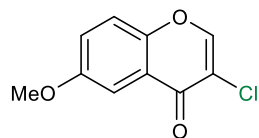

58.8 mg, 28% yield, white solid, m.p. 119-121 °C, <sup>1</sup>H NMR (400 MHz, CDCl<sub>3</sub>) δ 8.15 (s, 1H), 7.61 (d, *J* = 2.8 Hz, 1H), 7.43 (d, *J* = 9.2 Hz, 1H), 7.30 (dd, *J* = 9.2, 3.2 Hz, 1H), 3.92 (s, 3H); <sup>13</sup>C NMR (101 MHz, CDCl<sub>3</sub>) δ 172.3, 157.5, 152.0, 151.1, 124.6, 124.3, 120.3, 119.8, 105.2, 56.2; HRMS (ESI) calcd for C<sub>10</sub>H<sub>8</sub>ClO<sub>3</sub> [(M+H)<sup>+</sup>]: 211.0156; Found: 211.0146. The spectroscopic data coincide with the previous report.<sup>9</sup>

### 3-iodo-6-methoxychromone (4ab')

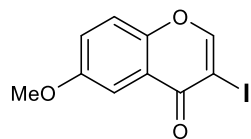

75.5 mg, 25% yield, white solid, m.p. 106-108 °C, <sup>1</sup>H NMR (400 MHz, CDCl<sub>3</sub>) δ 8.29 (s, 1H), 7.58 (d, *J* = 3.2 Hz, 1H), 7.41 (d, *J* = 9.2 Hz, 1H), 7.29 (dd, *J* = 9.2, 3.2 Hz, 1H), 3.90 (s, 3H); <sup>13</sup>C NMR (101 MHz, CDCl<sub>3</sub>) δ 173.4, 157.6, 157.5, 151.2, 124.4, 122.5, 119.6, 105.6, 86.0, 56.1; HRMS (ESI) calcd for C<sub>10</sub>H<sub>8</sub>IO<sub>3</sub> [(M+H)<sup>+</sup>]: 302.9513; Found: 302.9503. The spectroscopic data coincide with the previous report.<sup>8</sup>

### 3-chloro-7-acetoxychromone (4ac)

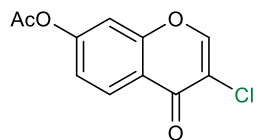

83.3 mg, 35% yield, white solid, m.p. 147-149 °C, <sup>1</sup>H NMR (400 MHz, CDCl<sub>3</sub>) δ 8.29 (d, *J* = 8.8 Hz, 1H), 8.15 (s, 1H), 7.32 (d, *J* = 2.0 Hz, 1H), 7.21 (dd, *J* = 8.8, 2.0 Hz, 1H), 2.36 (s, 3H); <sup>13</sup>C NMR (101 MHz, CDCl<sub>3</sub>) δ 171.7, 168.5, 156.6, 154.9, 152.4, 127.8, 121.2, 121.2, 120.3, 111.2, 21.3; HRMS (ESI) calcd for C<sub>11</sub>H<sub>8</sub>ClO<sub>4</sub> [(M+H)<sup>+</sup>]: 239.0111; Found: 239.0107. The spectroscopic data coincide with the previous report.<sup>10</sup>

### 3-iodo-7-acetoxychromone (4ac')

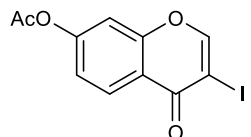

79.2 mg, 24% yield, white solid, m.p. 97-99 °C, <sup>1</sup>H NMR (400 MHz, CDCl<sub>3</sub>) δ 8.28 (s, 1H), 8.26 (d, *J* = 8.8 Hz, 1H), 7.31 (d, *J* = 2.0 Hz, 1H), 7.20 (dd, *J* = 8.8, 2.0 Hz, 1H); <sup>13</sup>C NMR (101 MHz, CDCl<sub>3</sub>) δ 172.8, 168.5, 158.0, 156.7, 154.9, 128.2, 120.4, 119.6, 111.0, 87.1, 21.3; HRMS (ESI) calcd for C<sub>11</sub>H<sub>8</sub>IO<sub>4</sub> [(M+H)<sup>+</sup>]: 330.9462; Found: 330.9464.

### 3-chloro-6-fluorochromone (4ad)

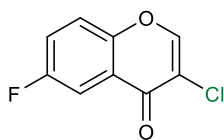

128.7 mg, 65% yield, white solid, m.p. 142-144 °C,  $^1\text{H}$  NMR (400 MHz,  $\text{CDCl}_3$ )  $\delta$  8.18 (s, 1H), 7.92 (dd,  $J = 8.0, 3.2$  Hz, 1H), 7.52 (dd,  $J = 9.2, 4.4$  Hz, 1H), 7.47-7.42 (m, 1H);  $^{13}\text{C}$  NMR (101 MHz,  $\text{CDCl}_3$ )  $\delta$  171.8, 159.9 (d,  $J_{\text{CF}} = 249.3$  Hz), 152.41, 124.7 (d,  $J_{\text{CF}} = 7.7$  Hz), 122.7 (d,  $J_{\text{CF}} = 25.6$  Hz), 120.6 (d,  $J_{\text{CF}} = 8.3$  Hz), 120.5, 111.3 (d,  $J_{\text{CF}} = 24.3$  Hz);  $^{19}\text{F}$  NMR (377 MHz,  $\text{CDCl}_3$ )  $\delta$  -113.7; HRMS (ESI) calcd for  $\text{C}_9\text{H}_5\text{ClFO}_2$  [(M+H) $^+$ ]: 198.9962; Found: 198.9968. The spectroscopic data coincide with the previous report.<sup>11</sup>

### 3-iodo-6-fluorochromone (4ad')

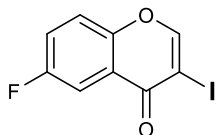

46.4 mg, 16% yield, white solid, m.p. 122-124 °C,  $^1\text{H}$  NMR (400 MHz,  $\text{CDCl}_3$ )  $\delta$  8.31 (s, 1H), 7.88 (dd,  $J = 8.0, 2.8$  Hz, 1H), 7.50 (dd,  $J = 9.2, 4.4$  Hz, 1H), 7.44 (ddd,  $J = 8.8, 7.6, 3.2$  Hz, 1H);  $^{13}\text{C}$  NMR (101 MHz,  $\text{CDCl}_3$ )  $\delta$  172.9 (d,  $J_{\text{CF}} = 2.5$  Hz), 159.9 (d,  $J_{\text{CF}} = 249.3$  Hz), 158.0, 152.5 (d,  $J_{\text{CF}} = 1.9$  Hz), 122.9 (d,  $J_{\text{CF}} = 7.7$  Hz), 122.7 (d,  $J_{\text{CF}} = 25.6$  Hz), 120.4 (d,  $J_{\text{CF}} = 8.3$  Hz), 111.6 (d,  $J_{\text{CF}} = 24.0$  Hz), 86.1;  $^{19}\text{F}$  NMR (377 MHz,  $\text{CDCl}_3$ )  $\delta$  -113.5; HRMS (ESI) calcd for  $\text{C}_9\text{H}_5\text{FIO}_2$  [(M+H) $^+$ ]: 290.9313; Found: 290.9319. The spectroscopic data coincide with the previous report.<sup>8</sup>

### 3, 6-dichlorochromone (4ae)

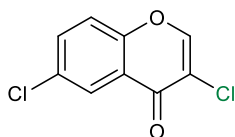

87.7 mg, 41% yield, white solid, m.p. 115-117 °C,  $^1\text{H}$  NMR (400 MHz,  $\text{CDCl}_3$ )  $\delta$  8.22 (d,  $J = 2.4$  Hz, 1H), 8.17 (s, 1H), 7.66 (dd,  $J = 8.8, 2.8$  Hz, 1H), 7.47 (d,  $J = 8.8$  Hz, 1H);  $^{13}\text{C}$  NMR (101 MHz,  $\text{CDCl}_3$ )  $\delta$  171.3, 154.4, 152.4, 134.6, 132.0, 125.6, 124.4, 121.0, 120.1; HRMS (ESI) calcd for  $\text{C}_9\text{H}_5\text{Cl}_2\text{O}_2$  [(M+H) $^+$ ]: 214.9661; Found: 214.9669. The spectroscopic data coincide with the previous report.<sup>11</sup>

### 3-iodo-6-chlorochromone (4ae')

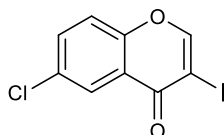

91.8 mg, 30% yield, white solid, m.p. 139-141 °C,  $^1\text{H}$  NMR (400 MHz,  $\text{CDCl}_3$ )  $\delta$  8.30 (s, 1H), 8.19 (d,  $J = 2.8$  Hz, 1H), 7.65 (dd,  $J = 8.8, 2.8$  Hz, 1H), 7.44 (d,  $J = 8.8$  Hz, 1H);  $^{13}\text{C}$  NMR (101 MHz,  $\text{CDCl}_3$ )  $\delta$  172.4, 158.0, 154.6, 134.5, 131.9, 126.0, 122.6, 119.9, 86.7; HRMS (ESI) calcd for  $\text{C}_9\text{H}_5\text{ClIO}_2$  [(M+H) $^+$ ]: 306.9017; Found: 306.9007. The spectroscopic data coincide with the previous report.<sup>8</sup>

### 3-chloro-6-bromochromone (4af)

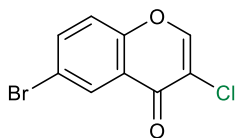

98.0 mg, 38% yield, white solid, m.p. 136-138 °C,  $^1\text{H}$  NMR (400 MHz,  $\text{CDCl}_3$ )  $\delta$  8.39 (d,  $J = 2.4$  Hz, 1H), 8.16 (s, 1H), 7.79 (dd,  $J = 8.8, 2.4$  Hz, 1H), 7.40 (d,  $J = 8.8$  Hz, 1H);  $^{13}\text{C}$  NMR (101 MHz,  $\text{CDCl}_3$ )  $\delta$  171.2, 154.9, 152.4, 137.4, 128.9, 124.8, 121.2, 120.3, 119.5; HRMS (ESI) calcd for  $\text{C}_9\text{H}_5\text{BrClO}_2$  [(M+H) $^+$ ]: 258.9161; Found: 258.9164. The spectroscopic data coincide with the previous report.<sup>9</sup>

### 3-iodo-6-bromochromone (4af')

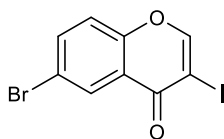

73.4 mg, 21% yield, white solid, m.p. 140-142 °C,  $^1\text{H}$  NMR (400 MHz,  $\text{CDCl}_3$ )  $\delta$  8.36 (d,  $J = 2.4$  Hz, 1H), 8.30 (s, 1H), 7.79 (dd,  $J = 8.8, 2.4$  Hz, 1H), 7.38 (d,  $J = 8.8$  Hz, 1H);  $^{13}\text{C}$  NMR (101 MHz,  $\text{CDCl}_3$ )  $\delta$  172.3, 158.0, 155.0, 137.3, 129.2, 123.0, 120.1, 119.4, 86.7; HRMS (ESI) calcd for  $\text{C}_9\text{H}_5\text{BrIO}_2$  [(M+H) $^+$ ]: 350.8512; Found: 350.8504. The

spectroscopic data coincide with the previous report.<sup>8</sup>

### 3, 6-dichloro-7-methylchromone (4ag)

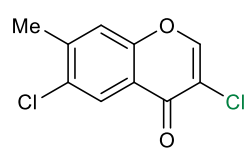

164.0 mg, 72% yield, white solid, m.p. 156-158 °C, <sup>1</sup>H NMR (400 MHz, CDCl<sub>3</sub>) δ 8.20 (s, 1H), 8.12 (s, 1H), 7.38 (s, 1H), 2.51 (s, 3H); <sup>13</sup>C NMR (101 MHz, CDCl<sub>3</sub>) δ 171.3, 154.4, 152.2, 143.9, 132.8, 125.9, 122.5, 120.9, 120.1, 21.0; HRMS (ESI) calcd for C<sub>10</sub>H<sub>7</sub>Cl<sub>2</sub>O<sub>2</sub> [(M+H)<sup>+</sup>]: 228.9823; Found: 228.9833. The spectroscopic data coincide with the previous report.<sup>11</sup>

### 3-iodo-6-chloro-7-methylchromone (4ag')

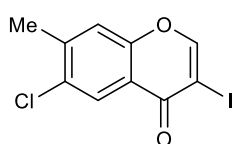

57.6 mg, 18% yield, white solid, m.p. 161-163 °C, <sup>1</sup>H NMR (400 MHz, CDCl<sub>3</sub>) δ 8.26 (s, 1H), 8.17 (s, 1H), 7.36 (s, 1H), 2.50 (s, 3H); <sup>13</sup>C NMR (101 MHz, CDCl<sub>3</sub>) δ 172.4, 157.8, 154.5, 143.8, 132.7, 126.2, 120.8, 119.9, 86.6, 21.0; HRMS (ESI) calcd for C<sub>10</sub>H<sub>7</sub>ClIO<sub>2</sub> [(M+H)<sup>+</sup>]: 320.9174; Found: 320.9173. The spectroscopic data coincide with the previous report.<sup>12</sup>

### 2-methyl-3-chlorochromone (4ah)

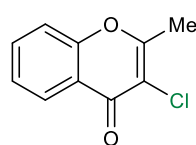

120.2 mg, 62% yield, white solid, m.p. 120-122 °C, <sup>1</sup>H NMR (400 MHz, CDCl<sub>3</sub>) δ 8.23 (dd, *J* = 8.0, 1.6 Hz, 1H), 7.68 (ddd, *J* = 8.8, 7.2, 1.6 Hz, 1H), 7.45-7.40 (m, 2H), 2.61 (s, 3H); <sup>13</sup>C NMR (101 MHz, CDCl<sub>3</sub>) δ 172.3, 163.1, 155.3, 133.9, 126.3, 125.5, 122.6, 118.5, 117.8, 19.4; HRMS (ESI) calcd for C<sub>10</sub>H<sub>8</sub>ClO<sub>2</sub> [(M+H)<sup>+</sup>]: 195.0207; Found: 195.0206. The spectroscopic data coincide with the previous report.<sup>13</sup>

## 7. Bromination of Chromones

General procedure: In a sealed tube, chromone (1 mmol, 1 equiv.), PhI (TFA)<sub>2</sub> (1.5 mmol, 1.5 equiv.), CH<sub>2</sub>Br<sub>2</sub> (5 mL) was added and heated at 100 °C until the starting material was consumed, which was monitored by TLC. After completion, the mixture was washed by water. The organic layer was dried by anhydrous Na<sub>2</sub>SO<sub>4</sub>, then it was subjected to column chromatography and the brominated product was obtained as pure solid.

### 3-bromochromone (4ba)

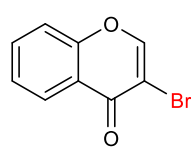

138.8 mg, 62% yield, white solid, m.p. 76-78 °C, <sup>1</sup>H NMR (400 MHz, CDCl<sub>3</sub>) δ 8.28 (ddd, *J* = 8.0, 1.6, 0.4 Hz, 1H), 8.25 (s, 1H), 7.73 (ddd, *J* = 8.8, 7.2, 1.6 Hz, 1H), 7.51-7.46 (m, 2H); <sup>13</sup>C NMR (101 MHz, CDCl<sub>3</sub>) δ 172.5, 156.2, 154.0, 134.3, 126.6, 126.1, 123.2, 118.3, 110.8; HRMS (ESI) calcd for C<sub>9</sub>H<sub>6</sub>BrO<sub>2</sub> [(M+H)<sup>+</sup>]: 224.9546; Found: 224.9563. The spectroscopic data coincide with the previous report.<sup>7</sup>

### 3-bromo-6-methoxychromone (4bb)

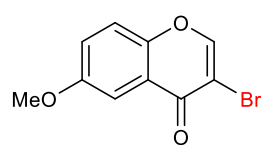

63.5 mg, 25% yield, white solid, m.p. 120-122 °C, <sup>1</sup>H NMR (400 MHz, CDCl<sub>3</sub>) δ 8.15 (s, 1H), 7.53 (d, *J* = 2.4 Hz, 1H), 7.35 (d, *J* = 9.2 Hz, 1H), 7.24-7.19 (m, 1H), 3.84 (s, 3H); <sup>13</sup>C NMR (101 MHz, CDCl<sub>3</sub>) δ 172.3, 157.5, 153.7, 151.1, 124.5, 124.0, 119.7, 110.0, 105.4, 56.2; HRMS (ESI) calcd for C<sub>10</sub>H<sub>8</sub>BrO<sub>3</sub> [(M+H)<sup>+</sup>]: 254.9651; Found: 254.9657. The spectroscopic data coincide with the previous report.<sup>11</sup>



### 3-bromo-7-acetoxychromone (4bc)

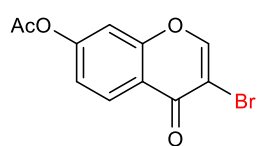

160.7 mg, 57% yield, white solid, m.p. 132-134 °C,  $^1\text{H}$  NMR (400 MHz,  $\text{CDCl}_3$ )  $\delta$  8.26 (d,  $J = 8.8$  Hz, 1H), 8.21 (s, 1H), 7.30 (d,  $J = 2.0$  Hz, 1H), 7.19 (dd,  $J = 8.8, 2.0$  Hz, 1H), 2.35 (s, 3H);  $^{13}\text{C}$  NMR (101 MHz,  $\text{CDCl}_3$ )  $\delta$  171.7, 168.5, 156.6, 154.9, 154.0, 128.0, 120.9, 120.3, 111.1, 111.0, 21.3; HRMS (ESI) calcd for  $\text{C}_{11}\text{H}_8\text{BrO}_4$  [(M+H) $^+$ ]: 282.9600; Found: 282.9595. The spectroscopic data coincide with the previous report.<sup>14</sup>

### 3-bromo-6-fluorochromone (4bd)

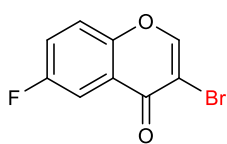

176.7 mg, 73% yield, white solid, m.p. 129-131 °C,  $^1\text{H}$  NMR (400 MHz,  $\text{CDCl}_3$ )  $\delta$  8.25 (s, 1H), 7.90 (dd,  $J = 8.0, 3.2$  Hz, 1H), 7.52 (dd,  $J = 9.2, 4.0$  Hz, 1H), 7.47-7.42 (m, 1H);  $^{13}\text{C}$  NMR (101 MHz,  $\text{CDCl}_3$ )  $\delta$  171.7, 159.9 (d,  $J_{\text{CF}} = 249.4$  Hz), 154.1, 152.4, 124.4 (d,  $J_{\text{CF}} = 7.6$  Hz), 122.7 (d,  $J_{\text{CF}} = 25.6$  Hz), 120.5 (d,  $J_{\text{CF}} = 8.3$  Hz), 111.4 (d,  $J_{\text{CF}} = 24.2$  Hz), 110.2 (d,  $J_{\text{CF}} = 1.5$  Hz);  $^{19}\text{F}$  NMR (377 MHz,  $\text{CDCl}_3$ )  $\delta$  -113.6; HRMS (ESI) calcd for  $\text{C}_9\text{H}_5\text{BrFO}_2$  [(M+H) $^+$ ]: 242.9451; Found: 242.9447. The spectroscopic data coincide with the previous report.<sup>11</sup>

### 3-bromo-6-chlorochromone (4be)

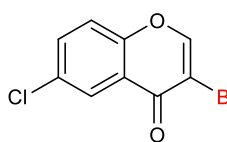

152.2 mg, 59% yield, white solid, m.p. 126-128 °C,  $^1\text{H}$  NMR (400 MHz,  $\text{CDCl}_3$ )  $\delta$  8.24 (s, 1H), 8.23-8.21 (m, 1H), 7.67-7.64 (m, 1H), 7.46 (d,  $J = 8.8$  Hz, 1H);  $^{13}\text{C}$  NMR (101 MHz,  $\text{CDCl}_3$ )  $\delta$  171.3, 154.5, 154.0, 134.6, 132.0, 125.8, 124.0, 120.1, 110.7; HRMS (ESI) calcd for  $\text{C}_9\text{H}_5\text{BrClO}_2$  [(M+H) $^+$ ]: 258.9161; Found: 258.9164. The spectroscopic data coincide with the previous report.<sup>12</sup>

### 3, 6-dibromochromone (4bf)

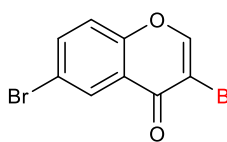

157.0 mg, 52% yield, white solid, m.p. 140-142 °C,  $^1\text{H}$  NMR (400 MHz,  $\text{CDCl}_3$ )  $\delta$  8.38 (d,  $J = 2.4$  Hz, 1H), 8.24 (s, 1H), 7.79 (dd,  $J = 8.8, 2.4$  Hz, 1H), 7.40 (d,  $J = 8.8$  Hz, 1H);  $^{13}\text{C}$  NMR (101 MHz,  $\text{CDCl}_3$ )  $\delta$  171.2, 154.9, 154.0, 137.3, 129.0, 124.4, 120.2, 119.5, 110.8; HRMS (ESI) calcd for  $\text{C}_9\text{H}_5\text{Br}_2\text{O}_2$  [(M+H) $^+$ ]: 302.8651; Found: 302.8649. The spectroscopic data coincide with the previous report.<sup>12</sup>

### 3-bromo-6-chloro-7-methylchromone (4bg)

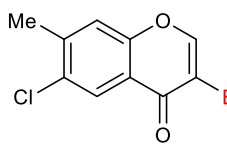

176.8 mg, 65% yield, white solid, m.p. 171-173 °C,  $^1\text{H}$  NMR (400 MHz,  $\text{CDCl}_3$ )  $\delta$  8.19 (s, 1H), 8.18 (s, 1H), 7.37 (s, 1H), 2.50 (s, 3H);  $^{13}\text{C}$  NMR (101 MHz,  $\text{CDCl}_3$ )  $\delta$  171.2, 154.4, 153.8, 143.8, 132.8, 126.0, 122.1, 120.0, 110.6, 21.0; HRMS (ESI) calcd for  $\text{C}_{10}\text{H}_7\text{BrClO}_2$  [(M+H) $^+$ ]: 272.9312; Found: 272.9310. The spectroscopic data coincide with the previous report.<sup>15</sup>

### 2-methyl-3-bromochromone (4bh)

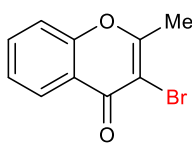

157.0 mg, 66% yield, white solid, m.p. 113-115 °C,  $^1\text{H}$  NMR (400 MHz,  $\text{CDCl}_3$ )  $\delta$  8.21 (dd,  $J = 8.0, 1.6$  Hz, 1H), 7.67 (ddd,  $J = 8.8, 7.2, 1.6$  Hz, 1H), 7.44-7.39 (m, 2H), 2.65 (s, 3H);  $^{13}\text{C}$  NMR (101 MHz,  $\text{CDCl}_3$ )  $\delta$  172.3, 164.1, 155.3, 133.9, 126.4, 125.6, 121.8, 117.7, 109.7, 21.8; HRMS (ESI) calcd for  $\text{C}_{10}\text{H}_8\text{BrO}_2$  [(M+H) $^+$ ]: 238.9702; Found: 238.9696. The spectroscopic data coincide with the previous report.<sup>13</sup>

### 3-bromo-6-nitrochromone (4bi)

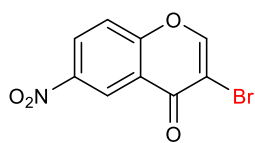

96.8 mg, 36% yield, white solid, m.p. 172-174 °C, <sup>1</sup>H NMR (400 MHz, CDCl<sub>3</sub>) δ 9.14 (d, *J* = 2.8 Hz, 1H), 8.55 (dd, *J* = 9.2, 2.8 Hz, 1H), 8.31 (s, 1H), 7.68 (d, *J* = 9.2 Hz, 1H); <sup>13</sup>C NMR (101 MHz, CDCl<sub>3</sub>) δ 171.1, 158.9, 154.2, 145.4, 128.6, 123.4, 123.2, 120.2, 111.7; HRMS (ESI) calcd for C<sub>9</sub>H<sub>5</sub>BrNO<sub>4</sub> [(M+H)<sup>+</sup>]: 269.9396; Found: 269.9385. The spectroscopic data coincide with the previous report.<sup>12</sup>

### 3-bromo-6-methylchromone (4bj)

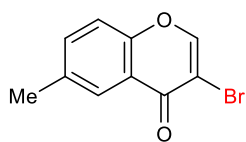

104.7 mg, 44% yield, white solid, m.p. 108-110 °C, <sup>1</sup>H NMR (400 MHz, CDCl<sub>3</sub>) δ 8.22 (s, 1H), 8.05 (s, 1H), 7.53 (dd, *J* = 8.4, 2.4 Hz, 1H), 7.39 (d, *J* = 8.4 Hz, 1H), 2.47 (s, 3H); <sup>13</sup>C NMR (101 MHz, CDCl<sub>3</sub>) δ 172.6, 154.5, 153.9, 136.2, 135.6, 125.8, 122.9, 118.0, 110.5, 21.1; HRMS (ESI) calcd for C<sub>10</sub>H<sub>8</sub>BrO<sub>2</sub> [(M+H)<sup>+</sup>]: 238.9702; Found: 238.9702. The spectroscopic data coincide with the previous report.<sup>7</sup>

## 8. Application of 3-bromoflavone and control experiments

### 3-(*p*-tolyl) flavone (5a)

Procedure: Pd (PPh<sub>3</sub>)<sub>4</sub> (12 mg, 0.01 mmol) was added to a mixture of 3-Bromo-2-phenyl chromen-4-one (100 mg, 0.33 mmol), 4-methylbenzeneboronic acid (135 mg, 0.99 mmol) and K<sub>3</sub>PO<sub>4</sub> (420 mg, 1.98 mmol) in THF (5 mL). The reaction was stirred at 85 °C for 30 min and at 110 °C for 1 h. then EtOAc was added and the solid filtered off. The solvents were removed in vacuo and the mixture was purified by column chromatography to obtain the product **5a** (88.5 mg).

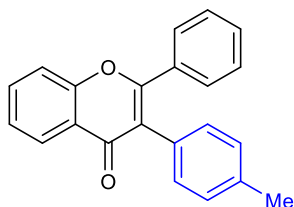

85% yield, white solid, m.p. 148-150 °C, <sup>1</sup>H NMR (400 MHz, CDCl<sub>3</sub>) δ 8.28 (dd, *J* = 8.0, 1.6 Hz, 1H), 7.67 (ddt, *J* = 8.8, 7.2, 1.6 Hz, 1H), 7.51 (d, *J* = 8.4 Hz, 1H), 7.43-7.38 (m, 3H), 7.35-7.31 (m, 1H), 7.28-7.24 (m, 2H), 7.11 (d, *J* = 0.8 Hz, 4H), 2.33 (s, 3H); <sup>13</sup>C NMR (101 MHz, CDCl<sub>3</sub>) δ 177.6, 161.3, 156.1, 137.3, 133.7, 133.5, 131.1, 130.0, 129.8, 129.6, 129.1, 128.1, 126.4, 125.1, 123.5, 122.9, 118.0, 21.4; HRMS (ESI) calcd for C<sub>22</sub>H<sub>17</sub>O<sub>2</sub> [(M+H)<sup>+</sup>]: 313.1229; Found: 313.1238. The spectroscopic data coincide with the previous report.<sup>16</sup>

### (*E*)-3-(4-chlorostyryl) flavone (5b)

Procedure: A mixture of 3-bromoflavone (100 mg, 0.33 mmol), potassium carbonate (68 mg, 0.51 mmol), potassium chloride (25 mg, 0.34 mmol), TBAB (273 mg, 0.68 mmol), palladium (II) acetate (4 mg) and alkene (1.08 mmol) in DMF (4 mL) was heated at 110°C. After the completion of reaction, the mixture was poured into water, the mixture was extracted with EtOAc, the combined organic layers were washed with water, dried and concentrated under reduced pressure. The mixture was purified by column chromatography to provide the product **5b** (106.0 mg).

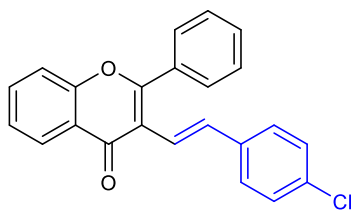

89% yield, white solid, m.p. 123-125 °C, <sup>1</sup>H NMR (400 MHz, CDCl<sub>3</sub>) δ 8.30 (dd, *J* = 8.0, 1.6 Hz, 1H), 7.99 (d, *J* = 16.4 Hz, 1H), 7.74-7.71 (m, 2H), 7.66 (ddd, *J* = 8.0, 6.8, 1.6 Hz, 1H), 7.59-7.52 (m, 3H), 7.48-7.40 (m, 2H), 7.28 (d, *J* = 8.8 Hz, 2H), 7.24 (d, *J* = 8.8 Hz, 2H), 6.77 (d, *J* = 16.4 Hz, 1H); <sup>13</sup>C NMR (101 MHz, CDCl<sub>3</sub>) δ 177.5, 163.4, 155.5, 136.8, 133.7, 133.2, 133.1, 131.0, 129.9, 128.8, 128.7, 127.7, 126.3, 125.3, 123.6, 120.9, 118.0, 117.4; HRMS (ESI) calcd for C<sub>23</sub>H<sub>16</sub>ClO<sub>2</sub> [(M+H)<sup>+</sup>]:359.0839; Found:359.0856. The spectroscopic data coincide with the previous report.<sup>17</sup>

### 3-(phenylethynyl) flavone (5c)

Procedure: A mixture of 3-bromoflavone (100 mg, 0.33 mmol), phenylacetylene (52 mg, 0.51 mmol), Pd (PPh<sub>3</sub>)<sub>4</sub> (9.8 mg, 0.0085 mmol), PPh<sub>3</sub> (16.3 mg, 0.0084 mmol), and copper(I)iodide (0.78 mg, 0.0041 mmol) in triethylamine (2 mL) was heated at 70 °C. After completion of the starting material, the solvent was removed under reduced pressure, and the residue was subjected to column chromatography to provide the pure product **5c** (88.0 mg).

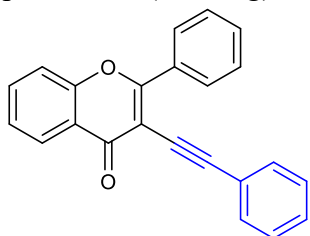

82% yield, white solid, m.p. 159-161 °C, <sup>1</sup>H NMR (400 MHz, CDCl<sub>3</sub>) δ 8.29 (dd, *J* = 8.0, 1.6 Hz, 1H), 8.26-8.23 (m, 2H), 7.70 (ddd, *J* = 8.4, 7.2, 1.6 Hz, 1H), 7.58-7.49 (m, 6H), 7.44 (ddd, *J* = 8.0, 7.2, 1.2 Hz, 1H), 7.34-7.30 (m, 3H); <sup>13</sup>C NMR (101 MHz, CDCl<sub>3</sub>) δ 176.7, 165.7, 155.6, 134.2, 132.6, 131.7, 131.7, 129.1, 128.6, 128.4, 126.3, 125.7, 123.3, 122.3, 118.1, 107.4, 97.9, 82.1; HRMS (ESI) calcd for C<sub>23</sub>H<sub>15</sub>O<sub>2</sub> [(M+H)<sup>+</sup>]:323.1072; Found:323.1085. The spectroscopic data coincide with the previous report.<sup>18</sup>

### Control Experiments:

#### Synthesis of 3-iodoflavone (2cc)

Procedure: In a sealed tube, flavone (100 mg, 0.45 mmol, 1.0 equiv.), PhI(TFA)<sub>2</sub> (774 mg, 1.8 mmol, 4.0 equiv.), MeCN (3 mL) was added and heated at 100 °C until the starting material was consumed, which was monitored by TLC. After completion, the mixture was washed by water. The organic layer was dried by anhydrous Na<sub>2</sub>SO<sub>4</sub>, then it was subjected to column chromatography. The pure product was obtained in 53% yield (83.0 mg).

## 9. References

- (1). (a) Gao, Q.; Lian, G.; Lin, F. The first total synthesis of 7-*O*-β-D-glucopyranosyl-4'-*O*-α-L-rhamnopyranosyl apigenin via a hexanoyl ester-based protection strategy apigenin via a hexanoyl ester-based protection strategy. *Carbohydr. Res.* **2009**, *344*, 511-515; (b) Yang, J.-M. Syntheses of some flavonoid compounds with 3'- or 4'-substituted methyl group. *Yaoxue Xuebao* **1980**, *15*, 684-687. (in Chinese); (c) Xu, G.-Y. NMR study on synthetic flavones with methyl group on B ring. *Yaoxue Xuebao* **1980**, *15*, 684-687. (in Chinese)
- (2). (a) Li, Y.-P.; Gu, J.; Li, L.-Z. Synthesis of 7-hydroxyflavone derivatives. *Hecheng Huaxue* **2011**, *19*, 189-193, 207. (in Chinese); (b) Zhao, Y.-P.; Liao, J.-L.; Liu, C.-F. Palladium-catalyzed regioselective arylation of 7-hydroxyflavone with diaryliodonium

- salts. *Tetrahedron Lett.* **2023**, *123*, 154573.
- (3) Merchant, J. R.; Rege, D. V. Reaction of thionyl chloride with flavone. *Tetrahedron Lett.* **1969**, *10*, 3589-3591.
- (4) Lewin, G. Process for the preparation of new flavone derivatives and pharmaceutical compositions containing them. French Patent **2003**, FR 2857665.
- (5) Zhou, Z.; Zhao, P.; Huang, W.; Yang, G. A Selective Transformation of Flavanones to 3-Bromoflavones and Flavones under Microwave Irradiation. *Adv. Synth. Catal.* **2006**, *348*, 63–67.
- (6) Myannik, K. A.; Yarovenko, V. N.; Krayushkin, M. M.; Levchenko, K. S. Synthesis of 2-substituted 3-iodo-4*H*-chromen-4-ones. *Russ. Chem. Bull. Int. Ed.* **2014**, *63*, 543-545.
- (7) Miliutina, M.; Janke, J.; Hassan, S.; Zaib, S.; Iqbal, J.; Lecka, J.; Sévigny, J.; Villinger, A.; Friedrich, A.; Lochbrunner, S.; Langer, P. A domino reaction of 3-chlorochromones with aminoheterocycles. Synthesis of pyrazolopyridines and benzofuroypyridines and their optical and ecto-5'-nucleotidase inhibitory effects. *Org. Biomol. Chem.* **2018**, *16*, 717-732.
- (8) Mutai, P.; Pavadai, E.; Wiid, I.; Ngwane, A.; Baker, B.; Chibale, K. Synthesis, antimycobacterial evaluation and pharmacophore modeling of analogues of the natural product formononetin. *Bioorg. Med. Chem. Lett.* **2015**, *25*, 2510-2513.
- (9) Li, S.; Zhang, L.; He, Q.; Zhang, X.; Yang, C. Synthesis of 2-alkyl-chroman-4-ones via cascade alkylation–dechlorination of 3-chlorochromones. *Org. Biomol. Chem.* **2021**, *19*, 5348-5352.
- (10) Nohara, A.; Ukawa, K.; Sanno, Y. Studies on antianaphylactic agents—III: A novel conversion reaction of 4-oxo-4*H*-1-benzopyran-3-carboxaldehydes to 3-halogenochromones. *Tetrahedron*, **1974**, *30*, 3563-3568.
- (11) Lin, Y.; Jin, J.; Wang, C.; Wan, J.-P.; Liu, Y. Electrochemical CH Halogenations of Enaminones and Electron-Rich Arenes with Sodium Halide (NaX) as Halogen Source for the Synthesis of 3-Halochromones and Haloarenes. *J. Org. Chem.* **2021**, *86*, 12378-12385.
- (12) Lin, Y.; Wan, J.-P.; Liu, Y. Synthesis of 3-halochromones with simple KX halogen sources enabled by in situ halide oxidation. *New J. Chem.* **2020**, *44*, 8120-8124.
- (13) Su, J.; Zhang, Y.; Chen, M.; Li, W.; Qin, X.; Xie, Y.; Qin, L.; Huang, S.; Zhang, M. A copper halide promoted regioselective halogenation of coumarins using N-halosuccinimide as halide source. *Synlett* **2019**, *30*, 630-634.
- (14) Son, S. H.; Do, J. M.; Yoo, J.-N.; Lee, H. W.; Kim, N. K.; Yoo, H.-S.; Gee, M. S.; Kim, J.-H.; Inn, K.-S.; Seo, M.-D.; Lee, J. K.; Kim, N.-J. Identification of ortho catechol-containing isoflavone as a privileged scaffold that directly prevents the aggregation of both amyloid  $\beta$  plaques and tau-mediated neurofibrillary tangles and its in vivo evaluation. *Bioorg. Chem.* **2021**, *113*, 105022.
- (15) Savych, I.; Gläsel, T.; Villinger, A.; Sosnovskikh, V. Y.; Iaroshenko, V. O.; Langer, P. Synthesis of functionalized 2-salicyloylfurans, furo [3, 2-*b*] chromen-9-ones and 2-benzoyl-8*H*-thieno [2, 3-*b*] indoles by one-pot cyclizations of 3-halochromones with  $\beta$ -ketoamides and 1, 3-dihydroindole-2-thiones. *Org. Biomol. Chem.* **2015**, *13*, 729-750.
- (16) Joshi, V.; Hatim, J. G. Facile synthesis of new substituted 3-aryl/

heteroarylflavones by Suzuki-Miyaura coupling of 3-bromoflavone with substituted aryl/heteroarylboronic acids. *Indian J. Heterocyclic Chem.* **2011**, *21*, 111-116.

(17) Fekete, S.; Patonay, T.; Silva, A. M. S.; Cavaleiro, J. A. S. A new synthesis of novel alkenylated flavones by palladium-catalyzed cross-coupling reactions. *ARKIVOC* **2012**, 210-225.

(18) Patonay, T.; Pazurik, I.; Ábrahám, A. C-Alkynylation of Chromones by Sonogashira Reaction. *Aust. J. Chem.* **2013**, *66*, 646–654. *52*, 2543–2546.

## 10. NMR Spectra of Products

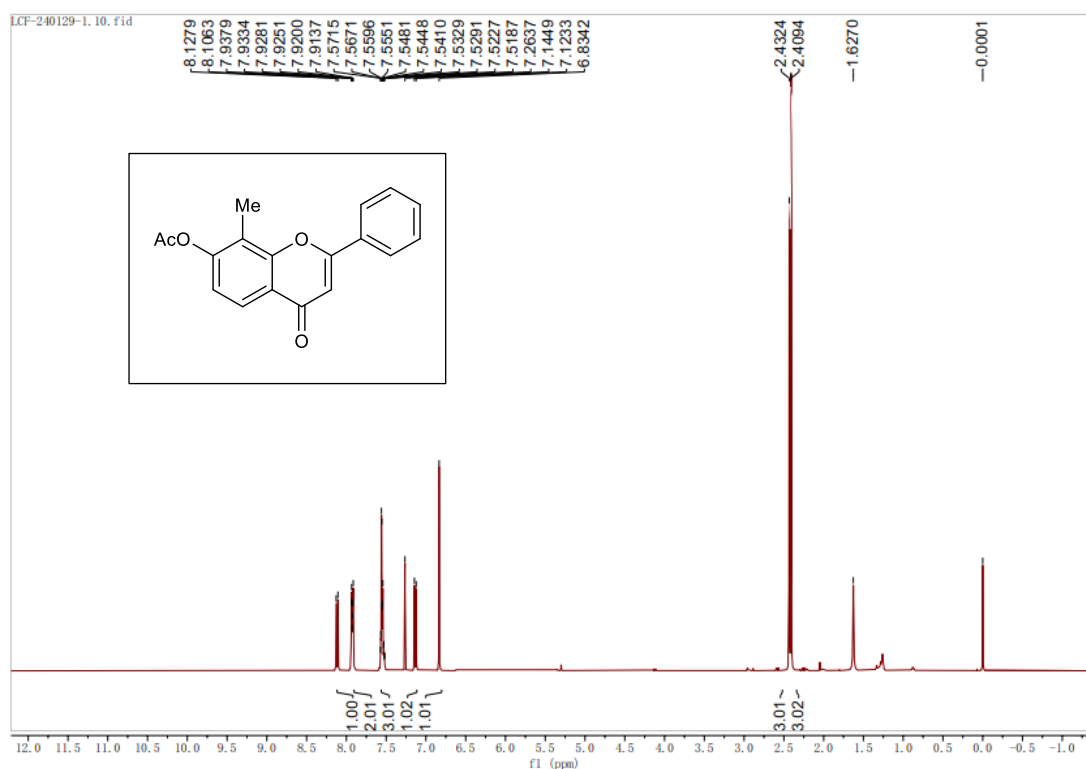

<sup>1</sup>H NMR Spectra of compound **1b** in CDCl<sub>3</sub> (400 MHz)

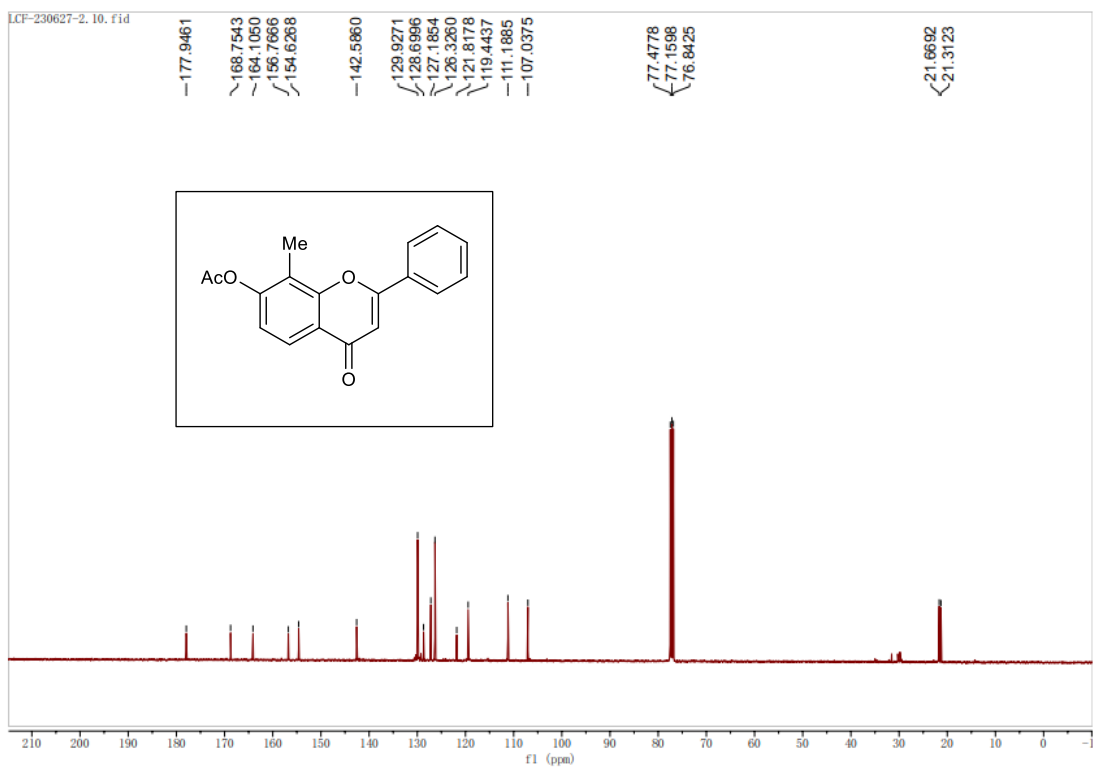

$^{13}\text{C}$  NMR Spectra of compound **1b** in  $\text{CDCl}_3$  (101 MHz)

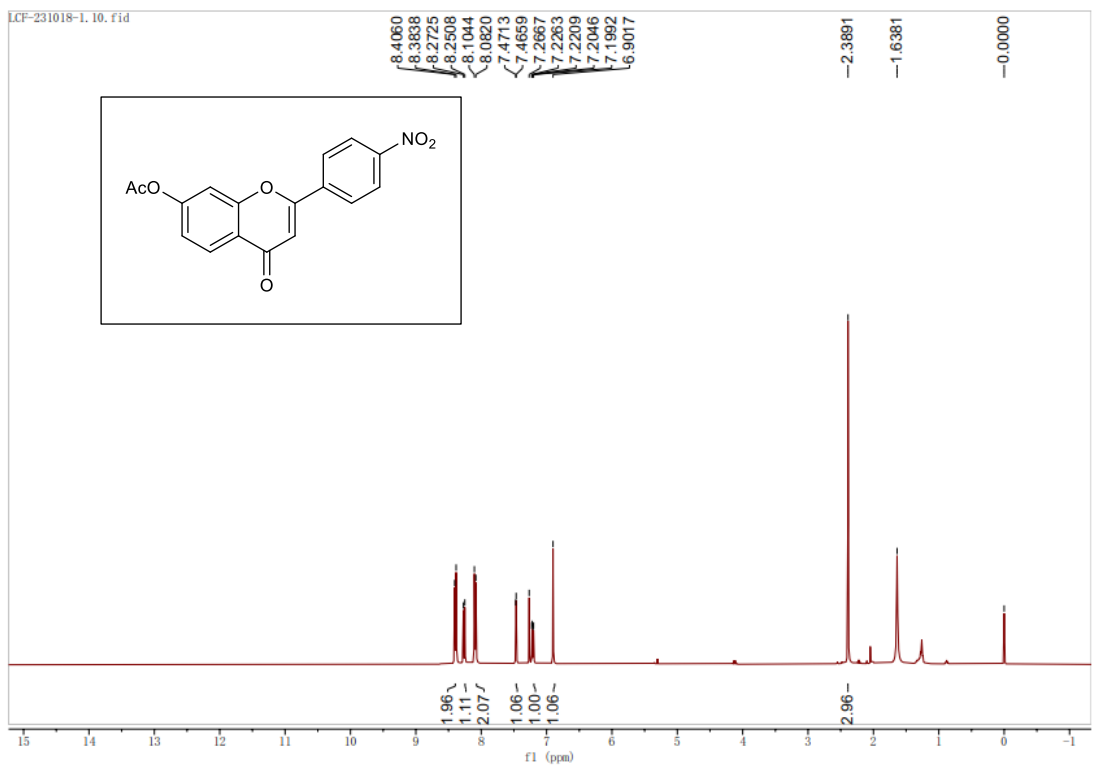

$^1\text{H}$  NMR Spectra of compound **1c** in  $\text{CDCl}_3$  (400 MHz)

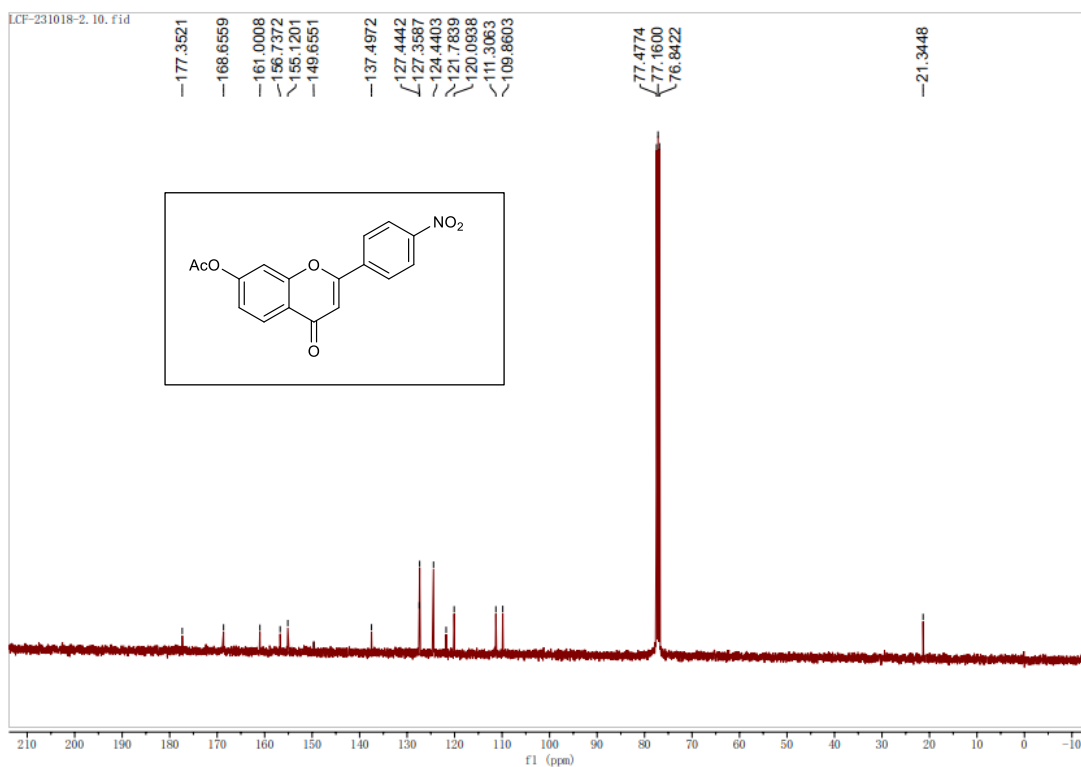

<sup>13</sup>C NMR Spectra of compound **1c** in CDCl<sub>3</sub> (101 MHz)

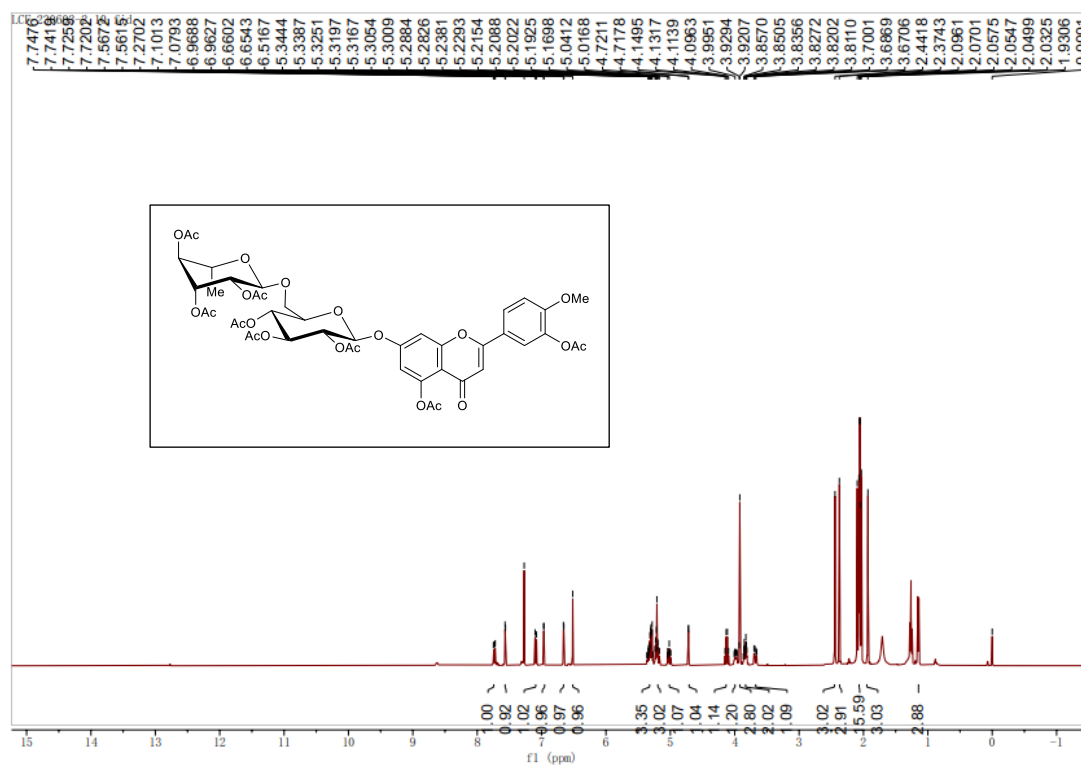

<sup>1</sup>H NMR Spectra of compound **1d** in CDCl<sub>3</sub> (400 MHz)

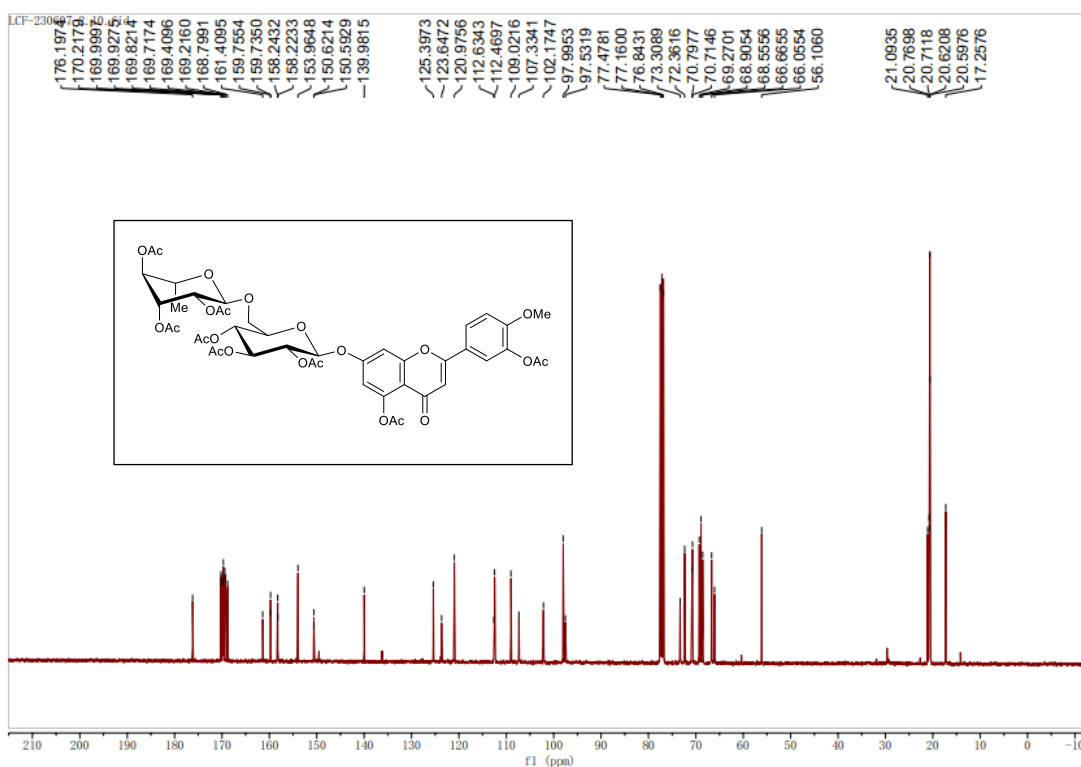

$^{13}\text{C}$  NMR Spectra of compound **1d** in  $\text{CDCl}_3$  (101 MHz)

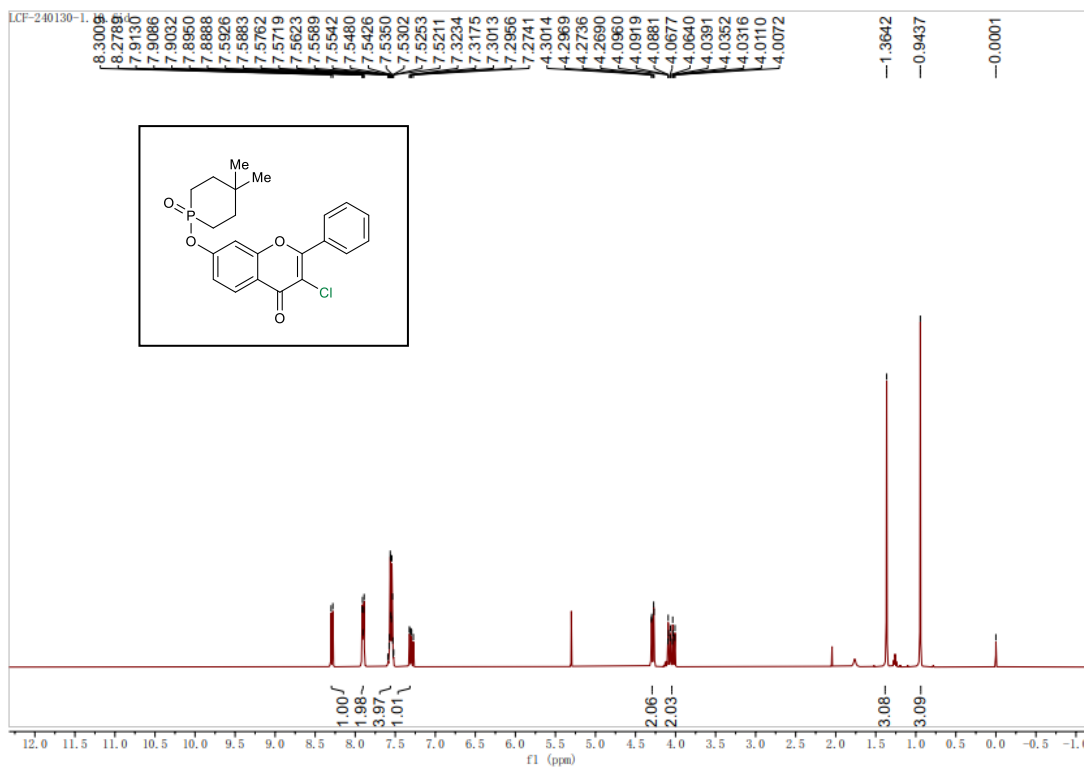

$^1\text{H}$  NMR Spectra of compound **2aa** in  $\text{CDCl}_3$  (400 MHz)



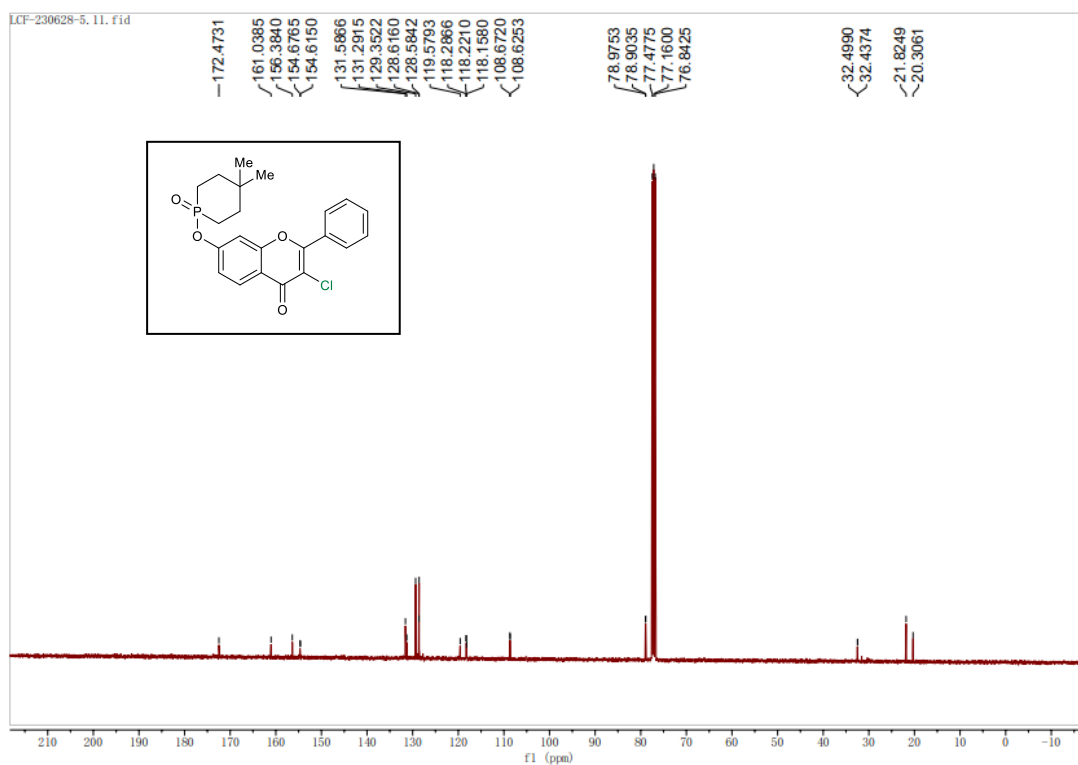

$^{13}\text{C}$  NMR Spectra of compound **2aa** in  $\text{CDCl}_3$  (101 MHz)

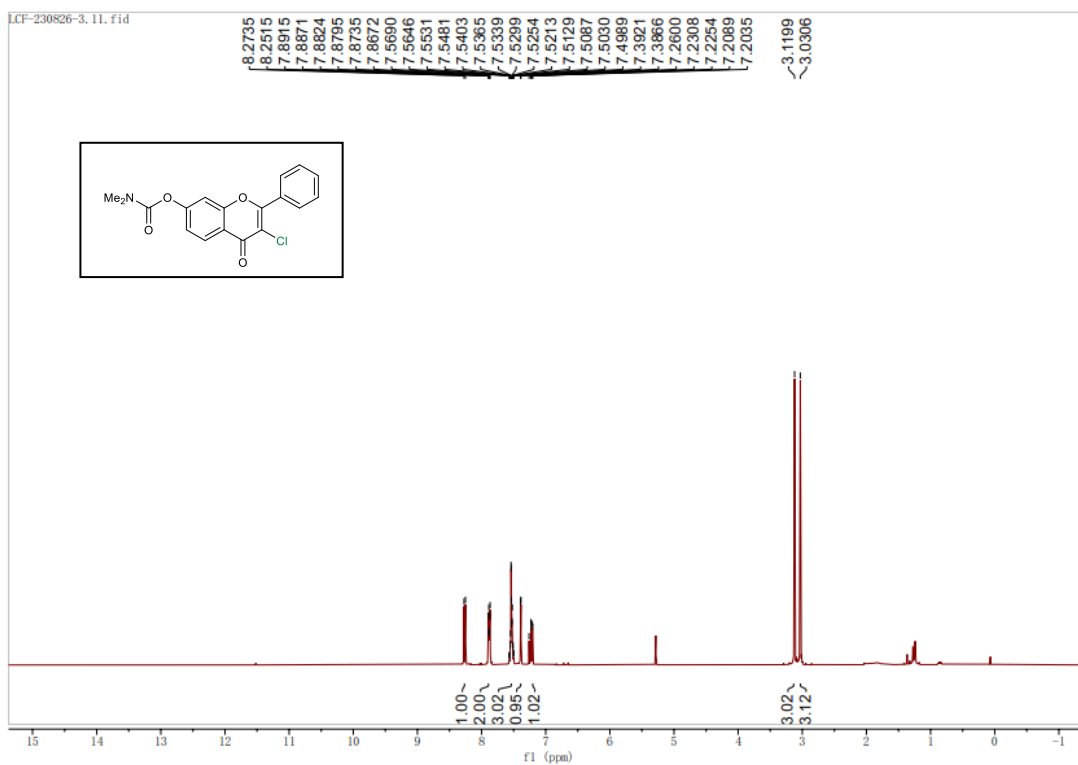

$^1\text{H}$  NMR Spectra of compound **2ab** in  $\text{CDCl}_3$  (400 MHz)

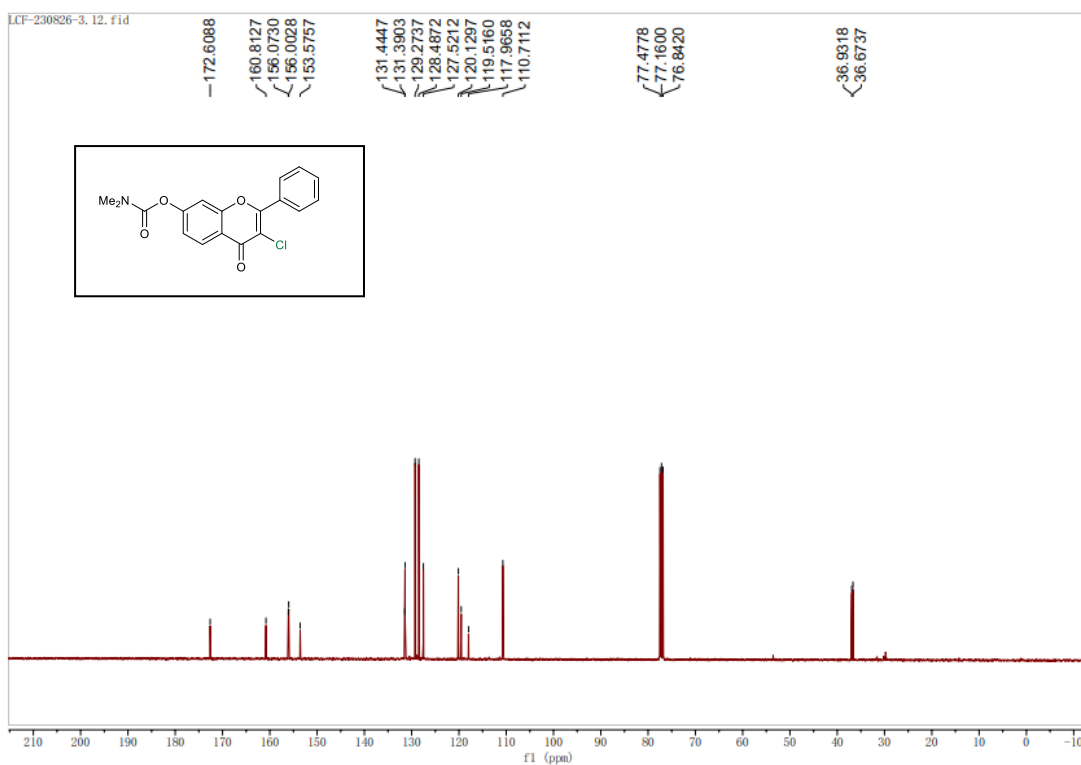

$^{13}\text{C}$  NMR Spectra of compound **2ab** in  $\text{CDCl}_3$  (101 MHz)

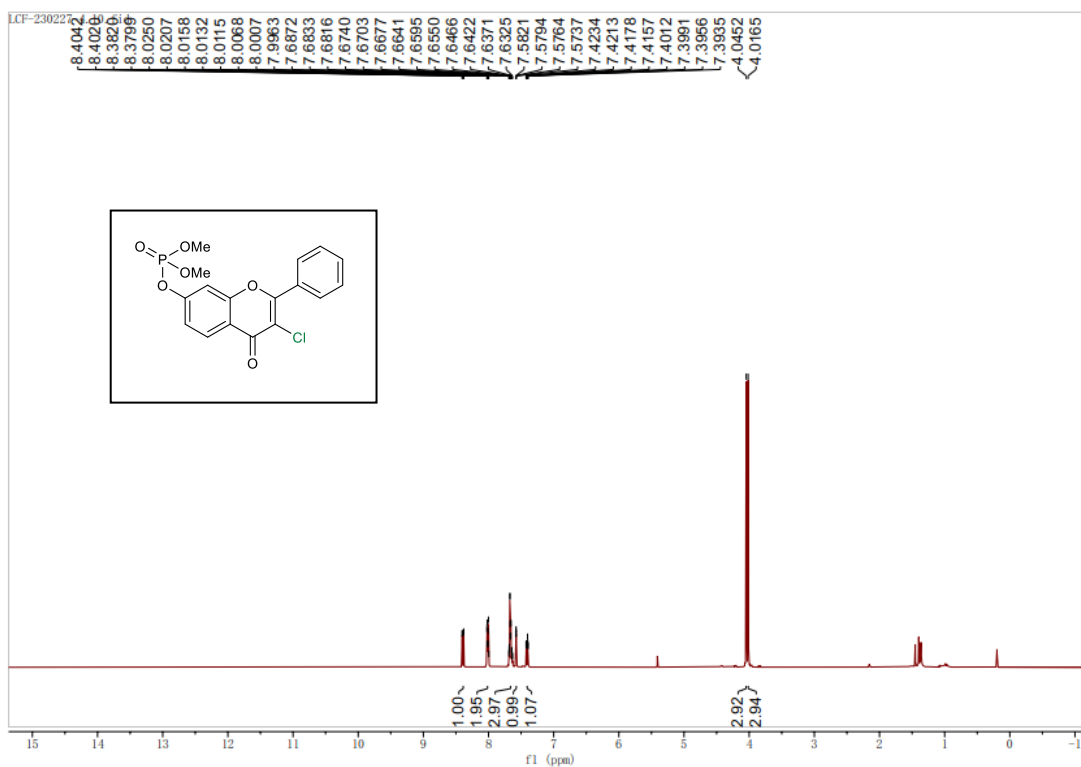

$^1\text{H}$  NMR Spectra of compound **2ac** in  $\text{CDCl}_3$  (400 MHz)

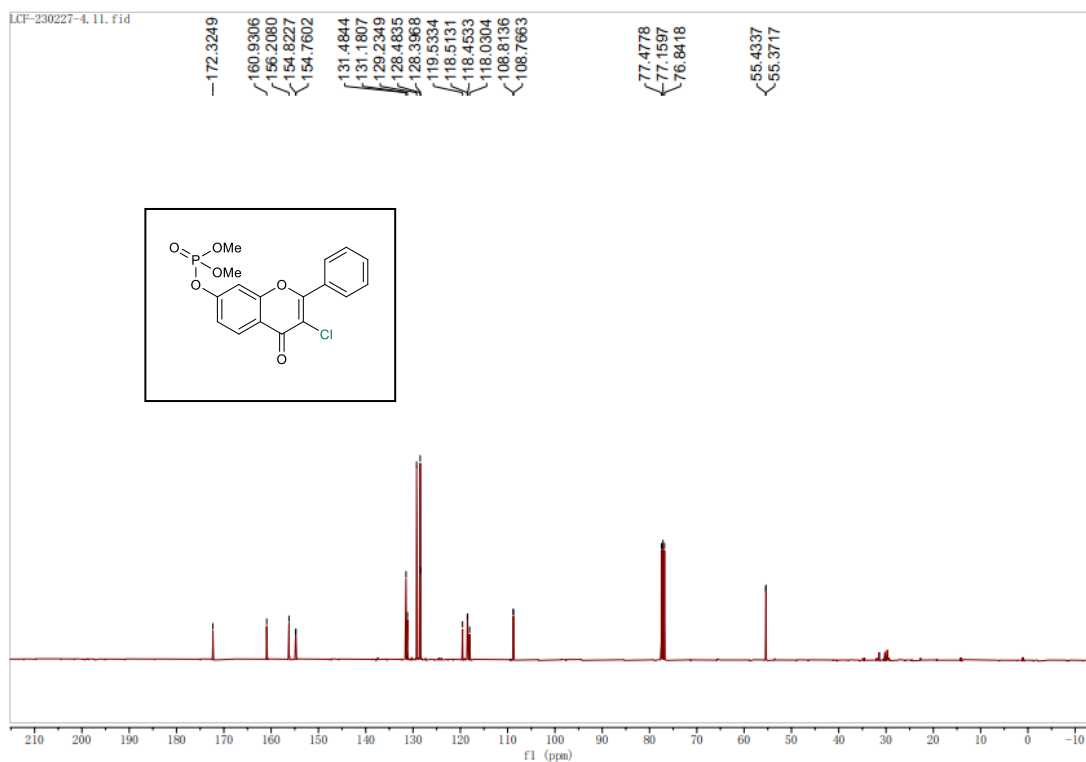

<sup>13</sup>C NMR Spectra of compound **2ac** in CDCl<sub>3</sub> (101 MHz)

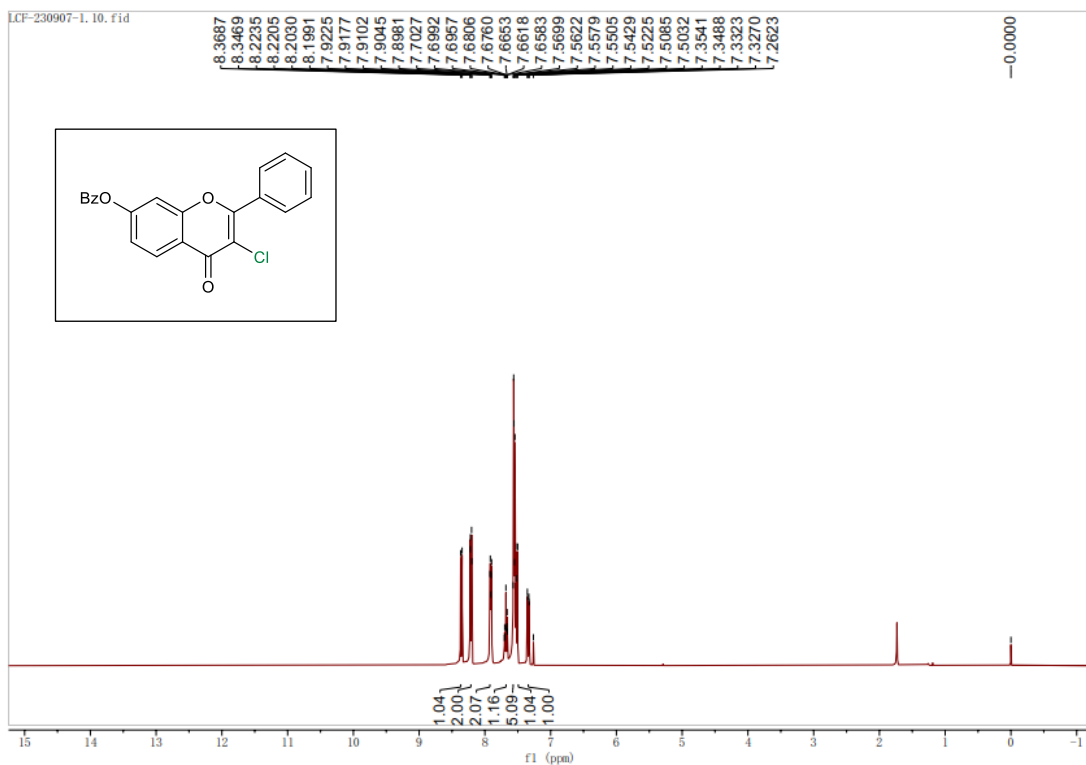

<sup>1</sup>H NMR Spectra of compound **2ad** in CDCl<sub>3</sub> (400 MHz)

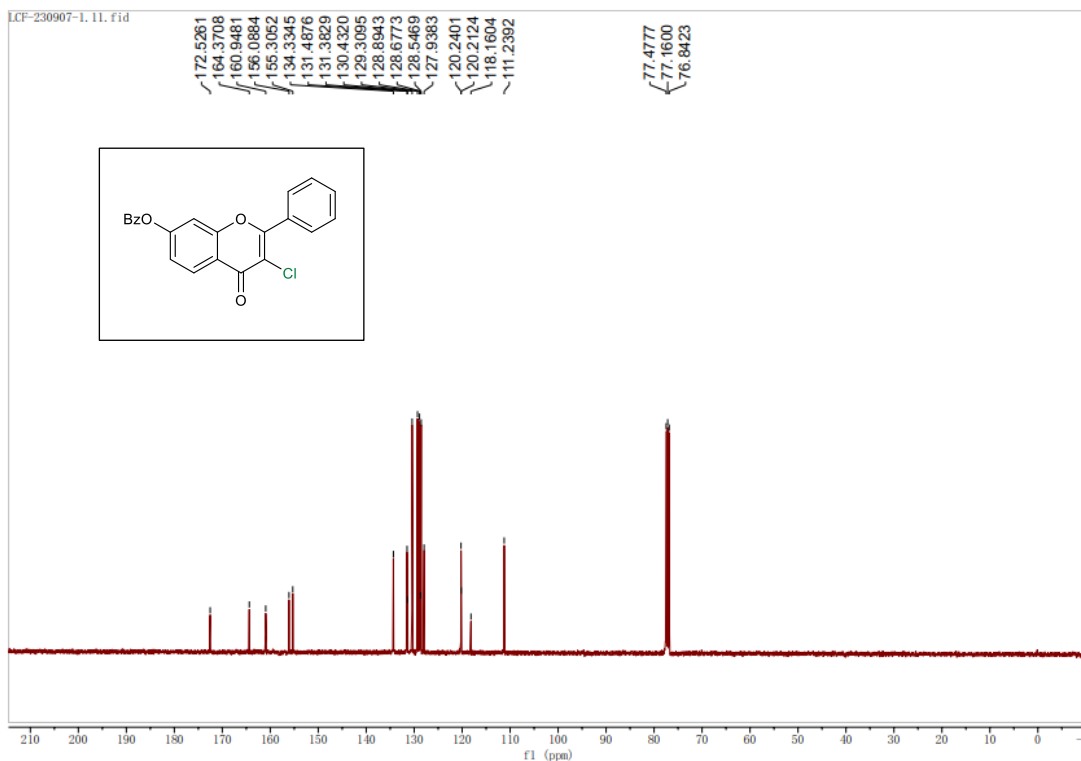

$^{13}\text{C}$  NMR Spectra of compound **2ad** in  $\text{CDCl}_3$  (101 MHz)

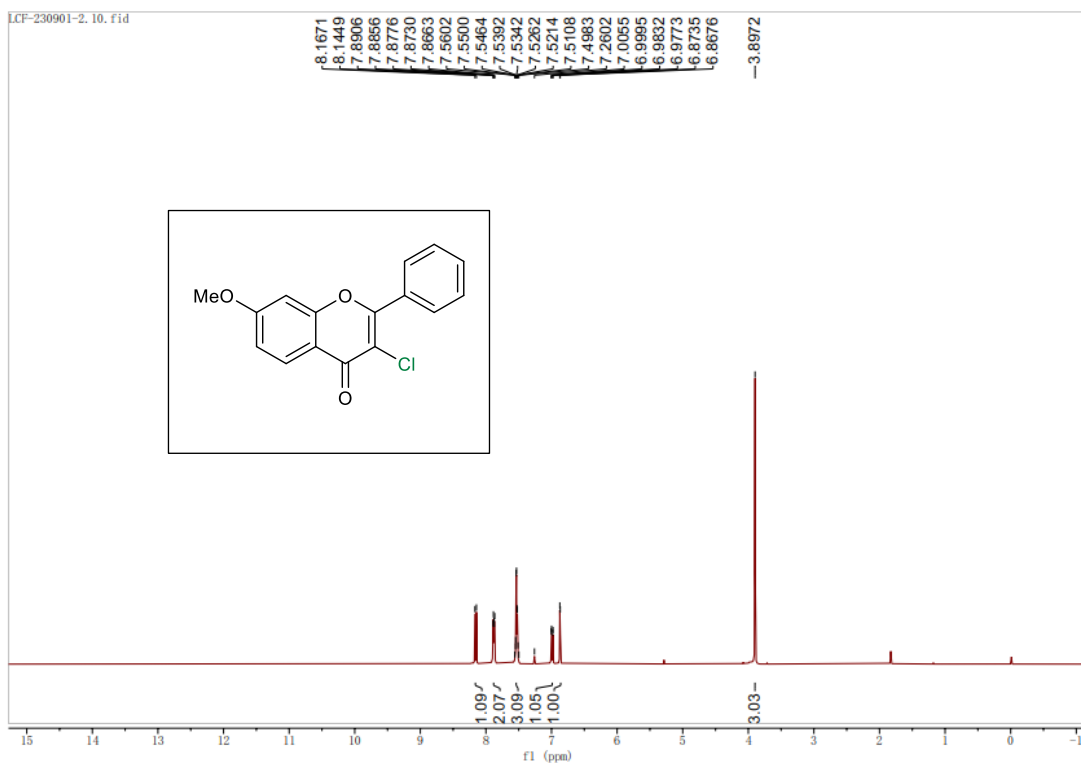

$^1\text{H}$  NMR Spectra of compound **2ae** in  $\text{CDCl}_3$  (400 MHz)

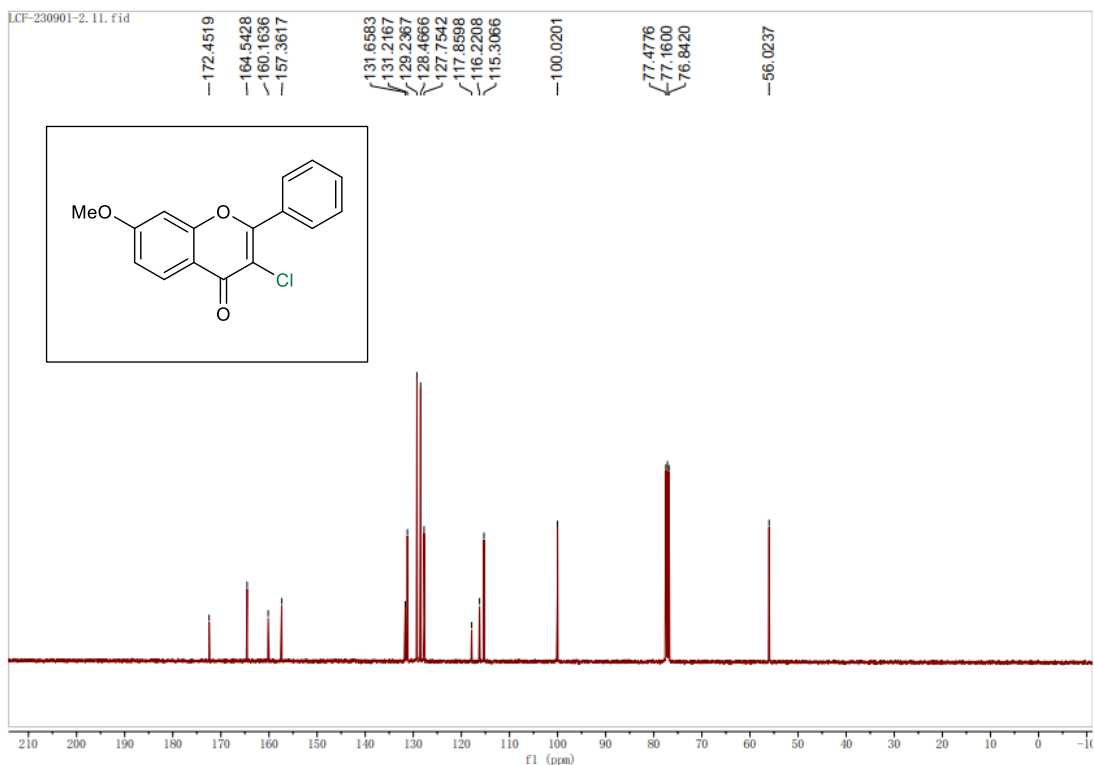

<sup>13</sup>C NMR Spectra of compound **2ae** in CDCl<sub>3</sub> (101 MHz)

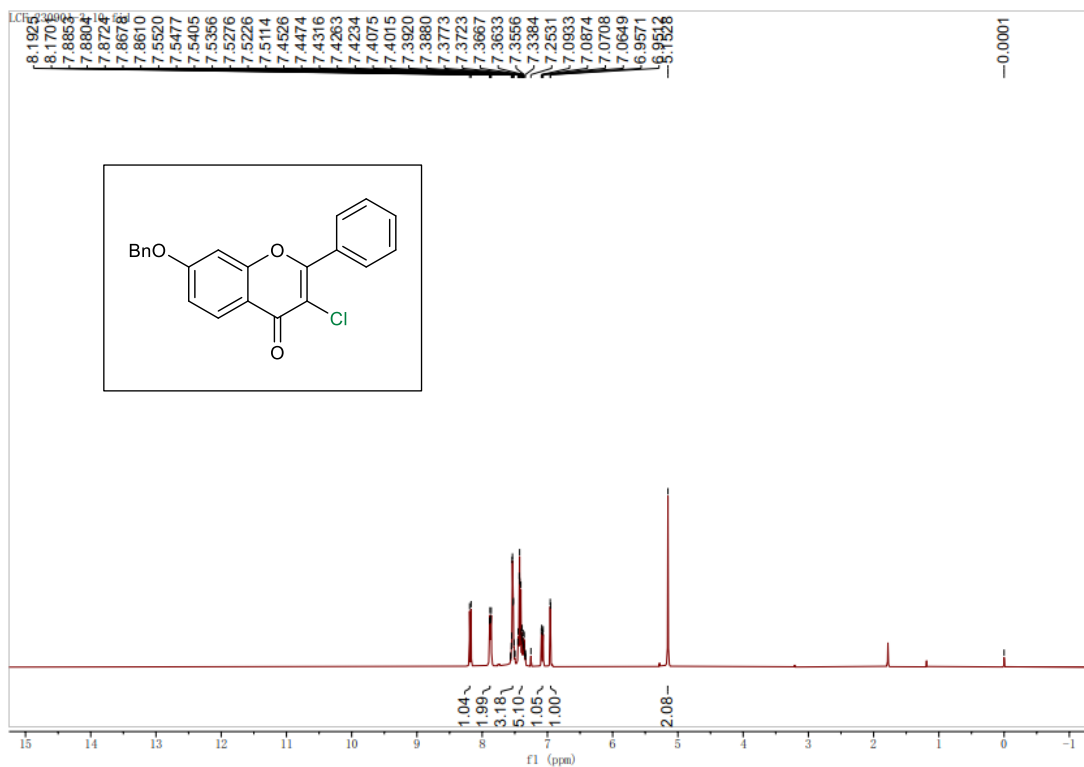

<sup>1</sup>H NMR Spectra of compound **2af** in CDCl<sub>3</sub> (400 MHz)

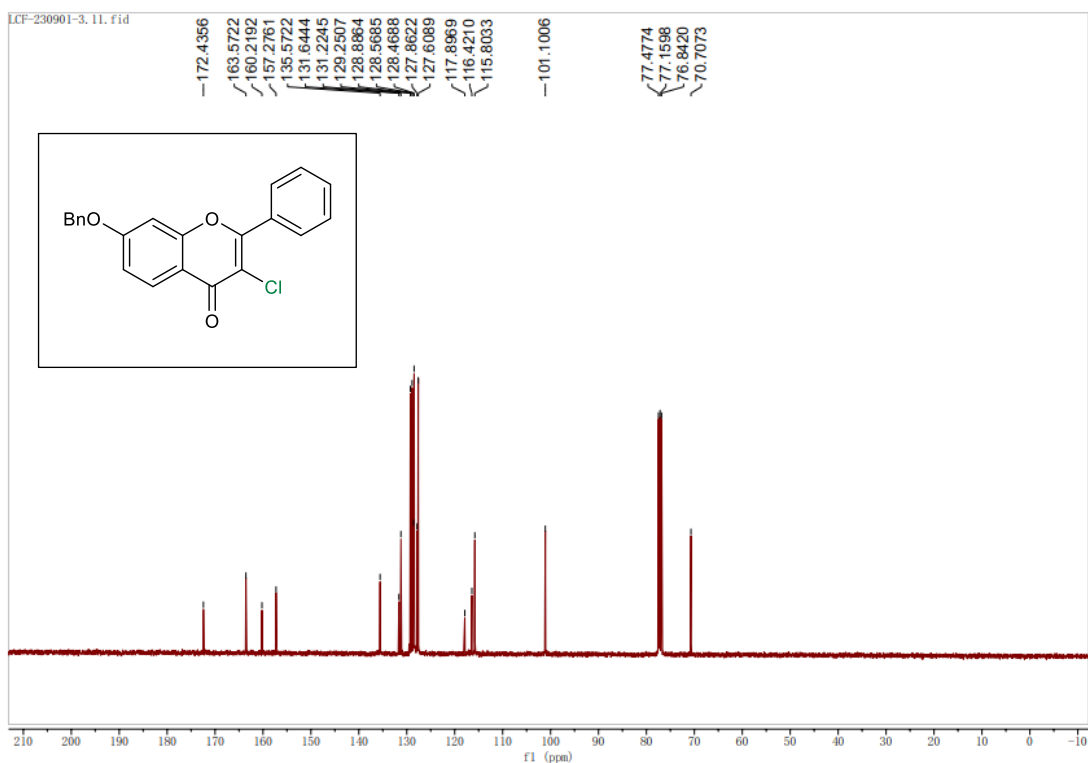

<sup>13</sup>C NMR Spectra of compound **2af** in CDCl<sub>3</sub> (101 MHz)

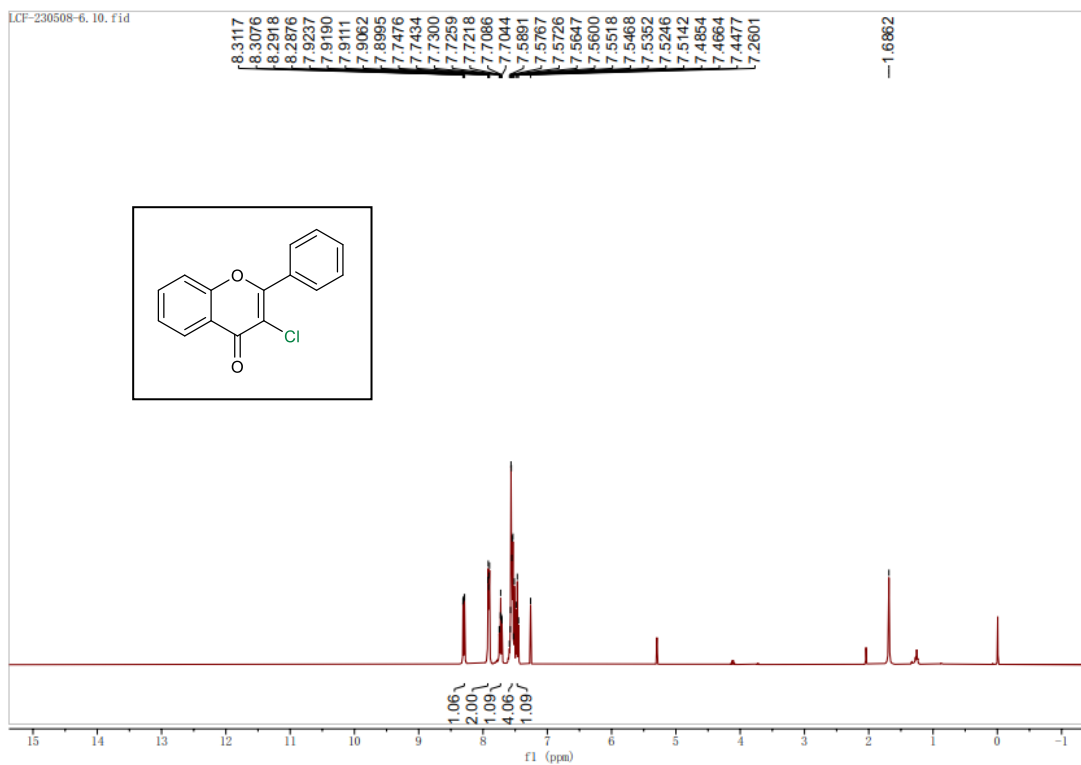

<sup>1</sup>H NMR Spectra of compound **2ag** in CDCl<sub>3</sub> (400 MHz)

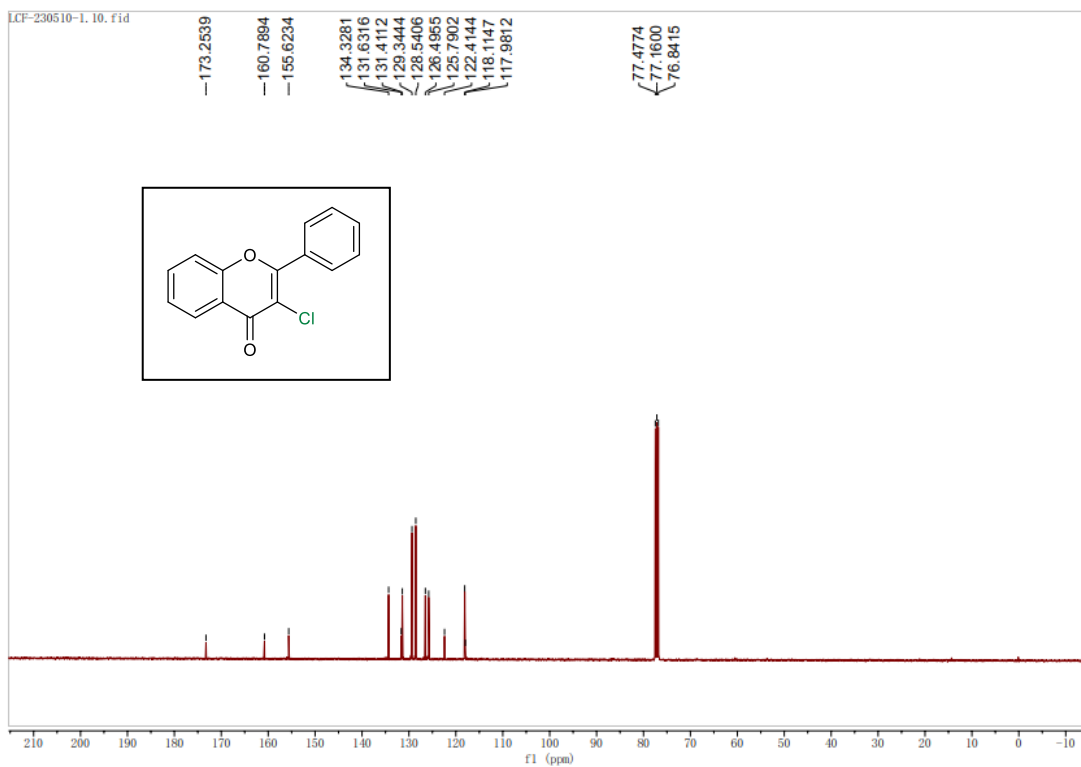

<sup>13</sup>C NMR Spectra of compound **2ag** in CDCl<sub>3</sub> (101 MHz)

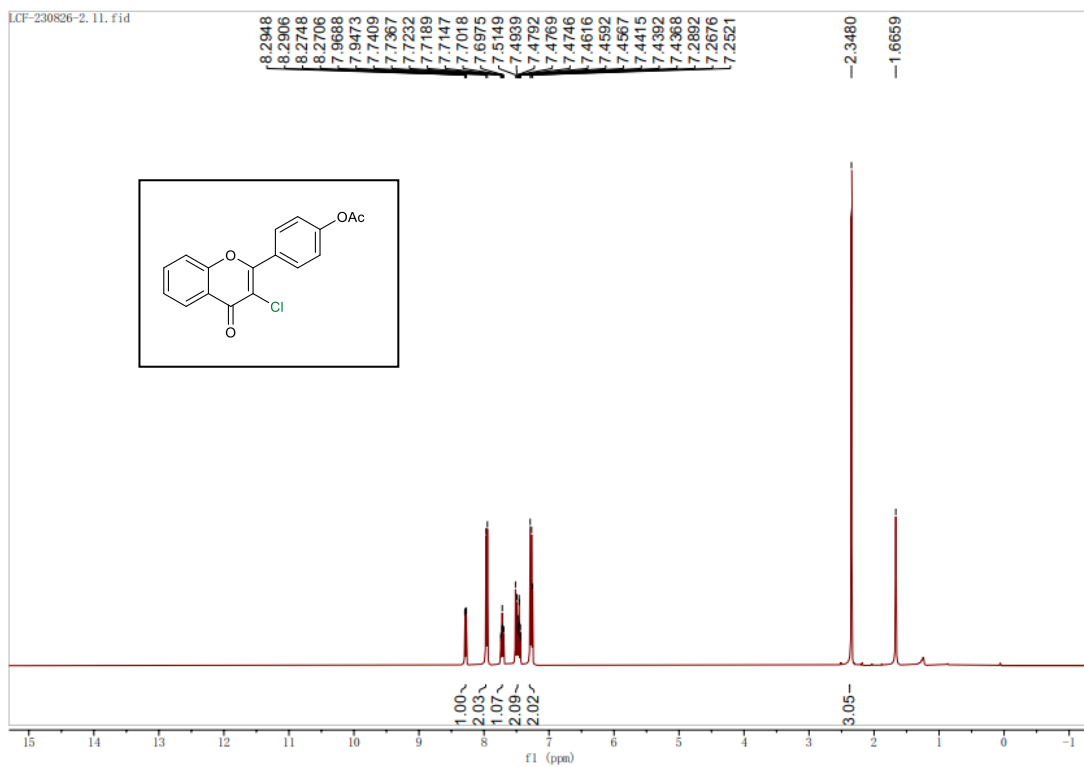

<sup>1</sup>H NMR Spectra of compound **2ah** in CDCl<sub>3</sub> (400 MHz)

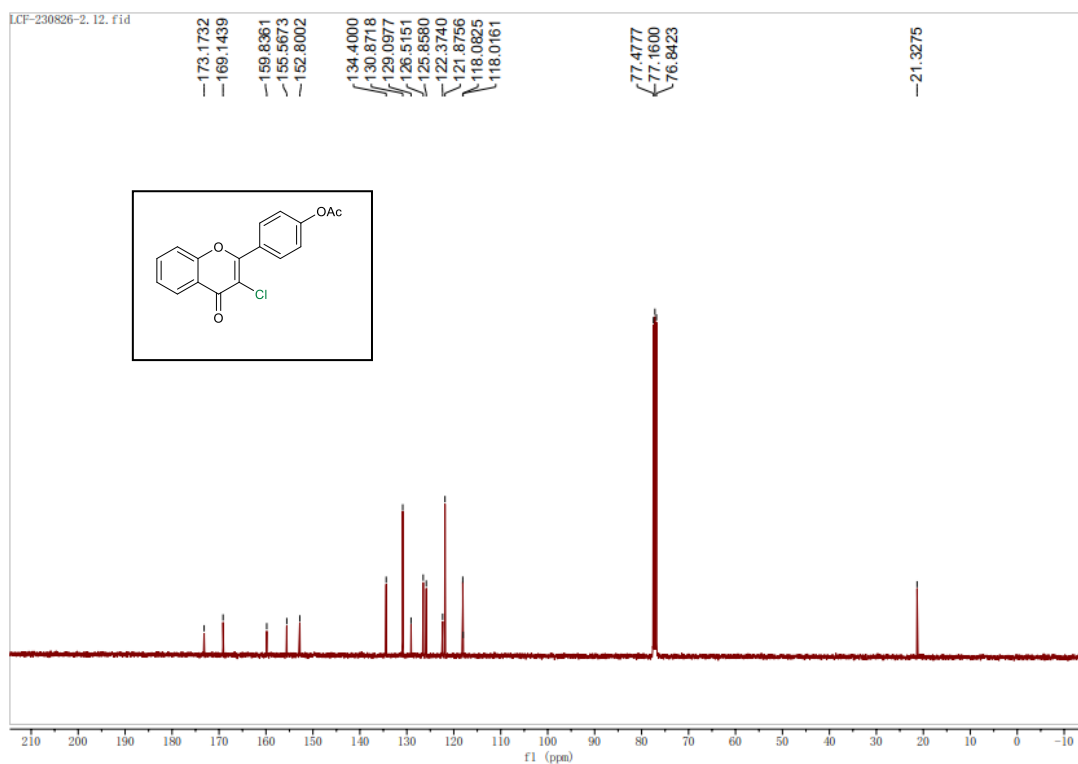

$^{13}\text{C}$  NMR Spectra of compound **2ah** in  $\text{CDCl}_3$  (101 MHz)

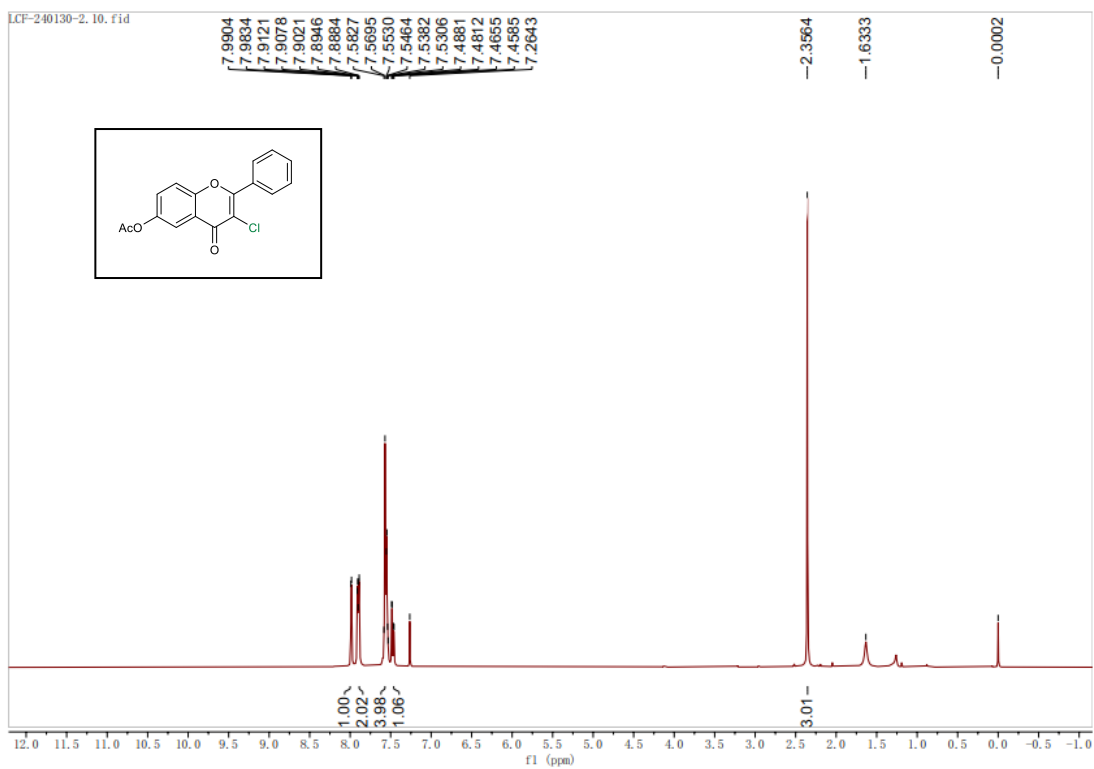

$^1\text{H}$  NMR Spectra of compound **2ai** in  $\text{CDCl}_3$  (400 MHz)



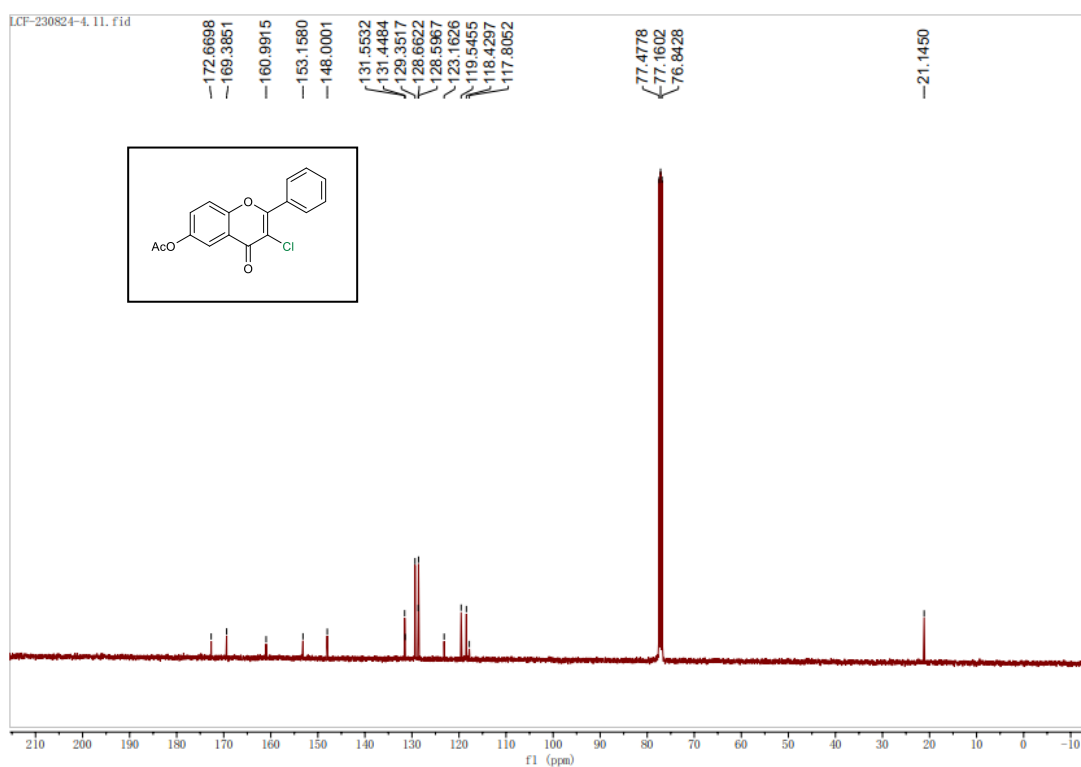

$^{13}\text{C}$  NMR Spectra of compound **2ai** in  $\text{CDCl}_3$  (101 MHz)

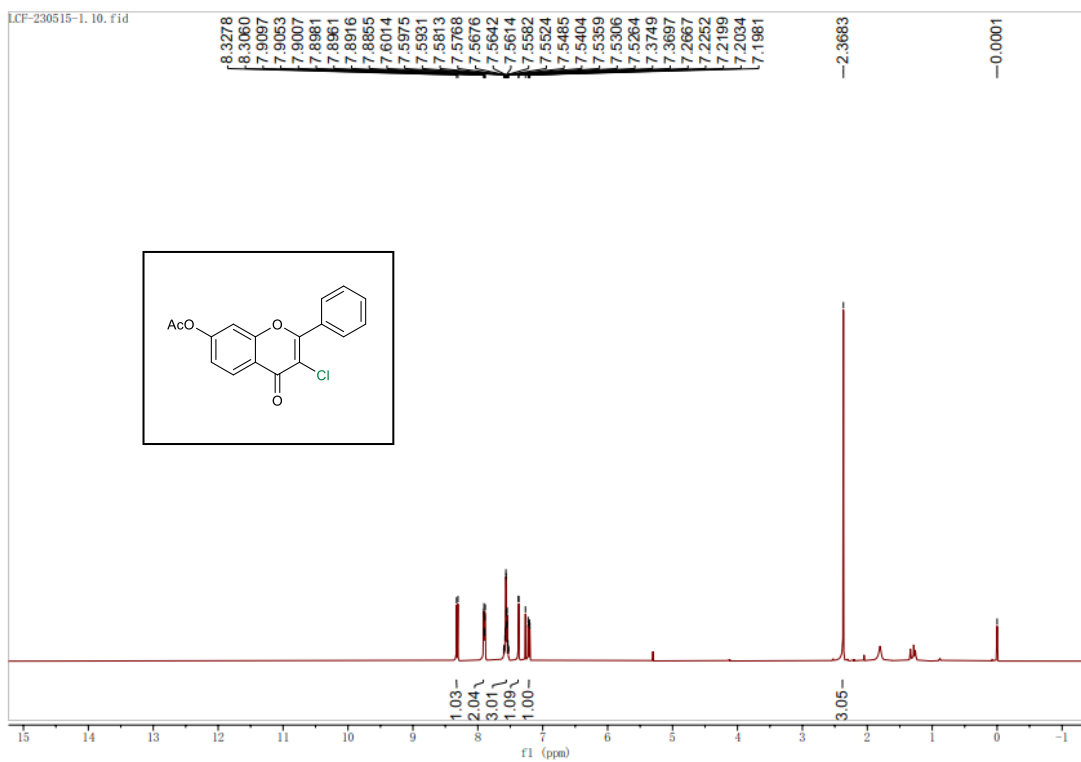

$^1\text{H}$  NMR Spectra of compound **2aj** in  $\text{CDCl}_3$  (400 MHz)

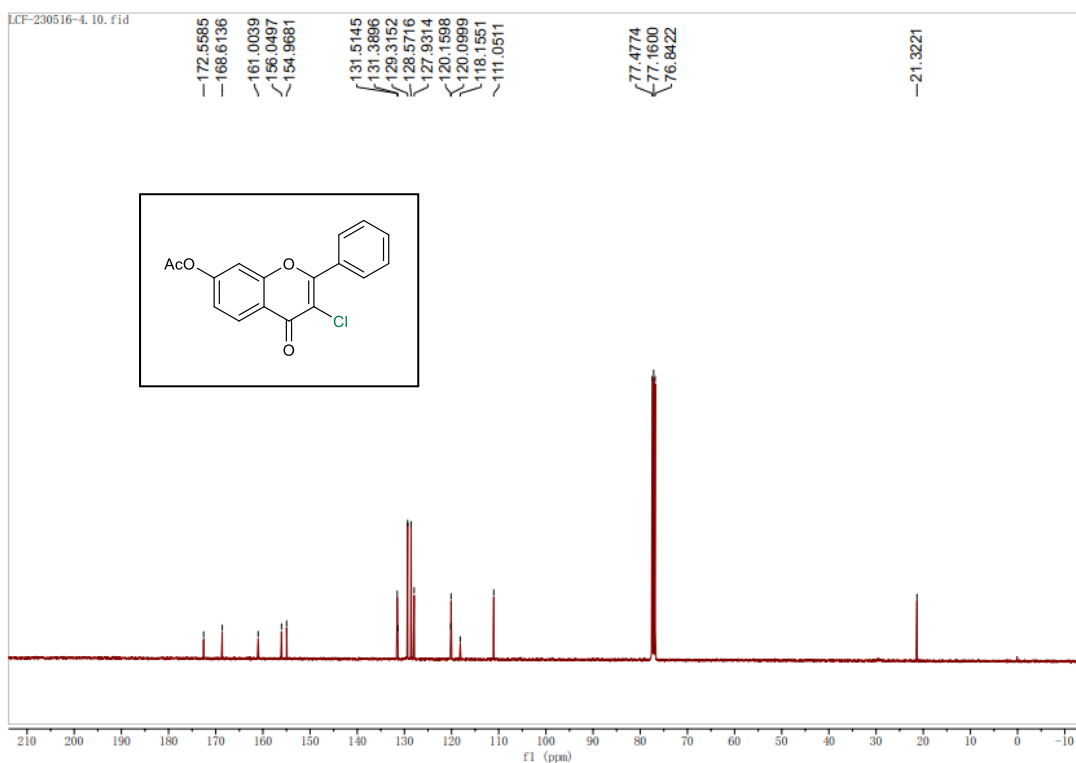

$^{13}\text{C}$  NMR Spectra of compound **2aj** in  $\text{CDCl}_3$  (101 MHz)

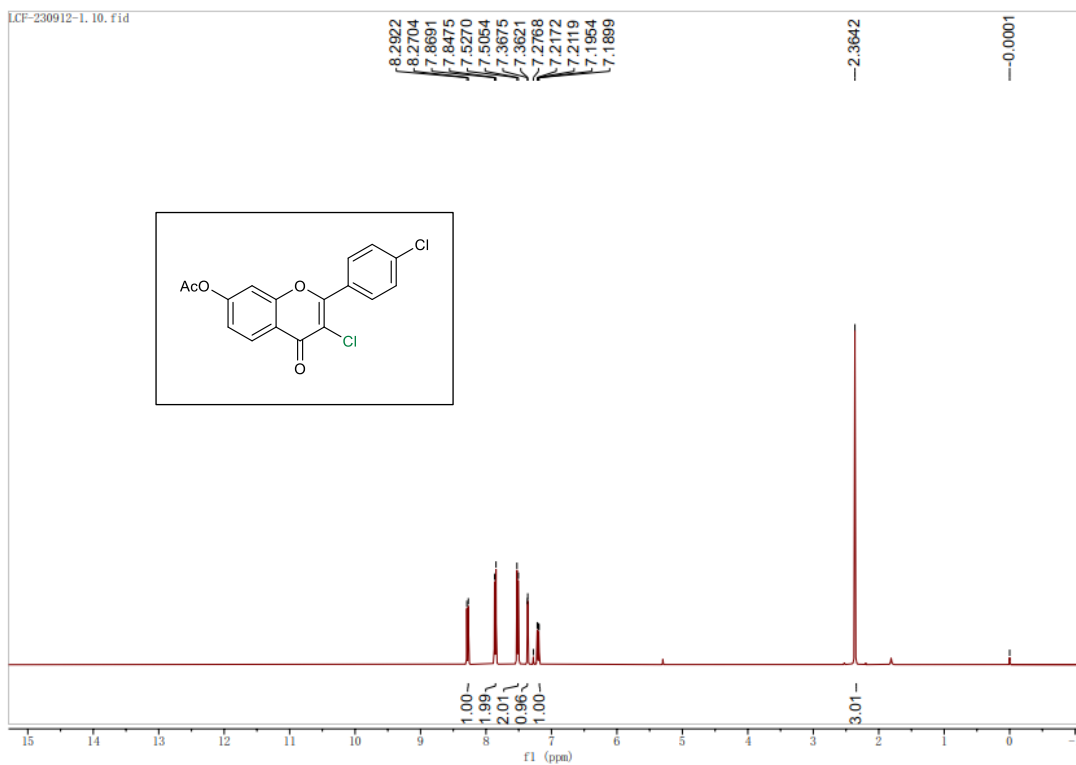

$^1\text{H}$  NMR Spectra of compound **2ak** in  $\text{CDCl}_3$  (400 MHz)

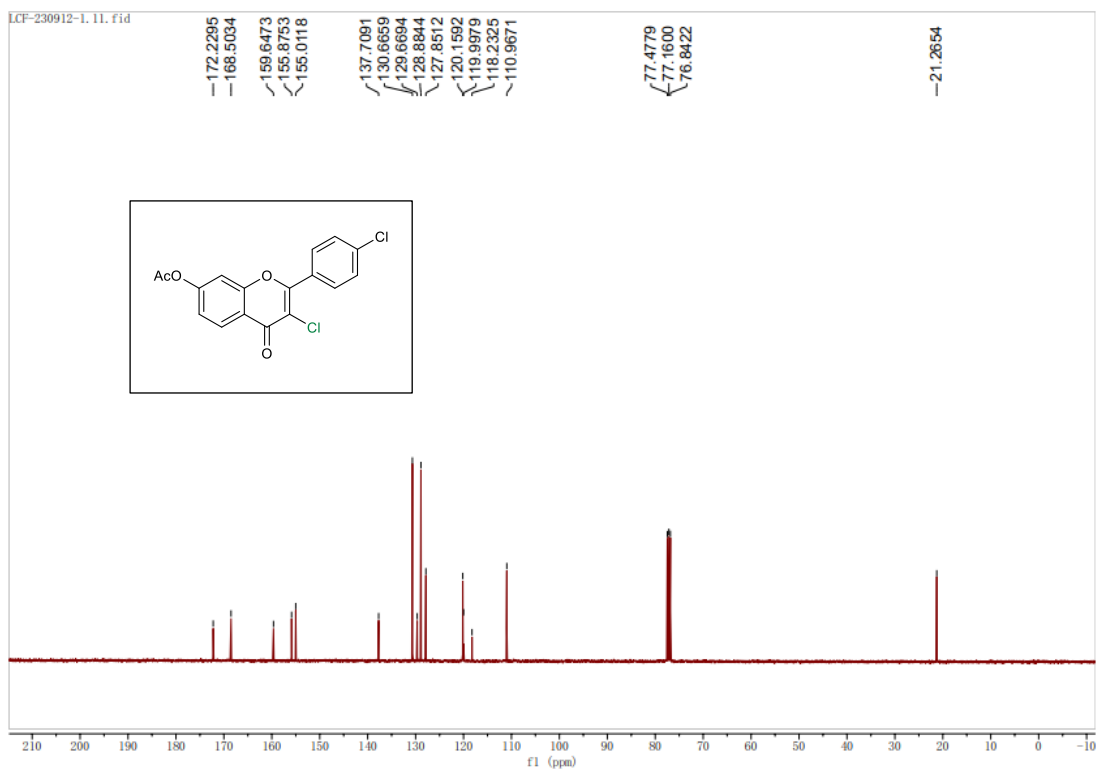

$^{13}\text{C}$  NMR Spectra of compound **2ak** in  $\text{CDCl}_3$  (101 MHz)

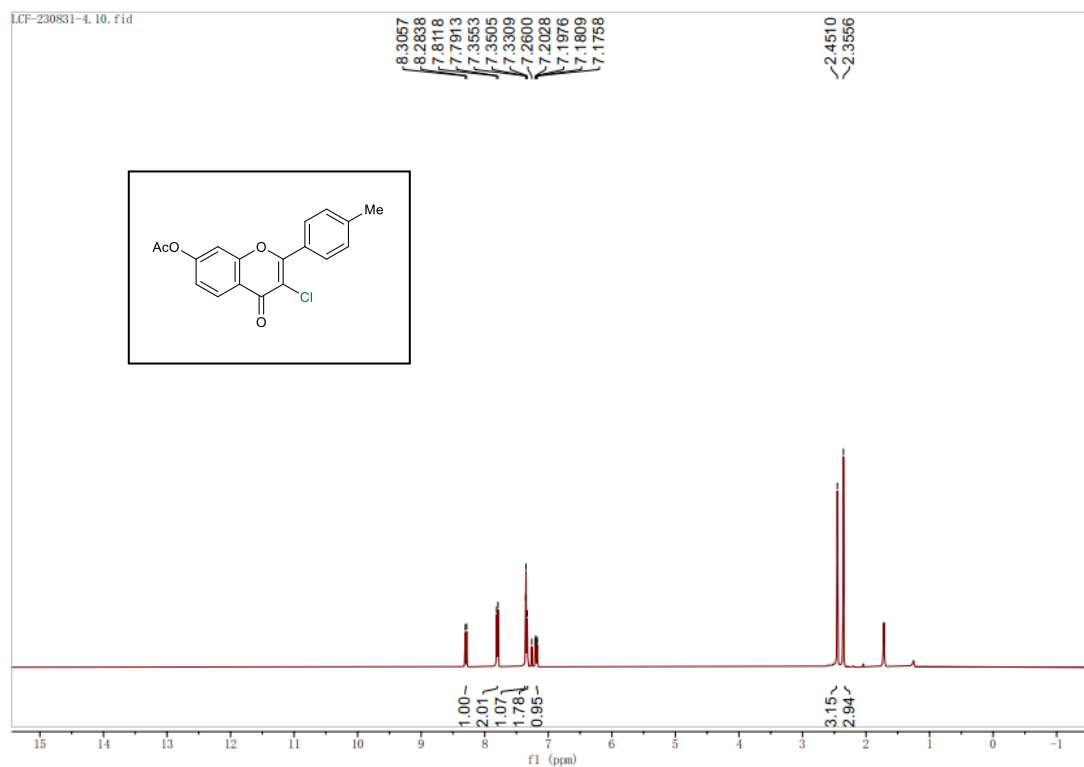

$^1\text{H}$  NMR Spectra of compound **2al** in  $\text{CDCl}_3$  (400 MHz)

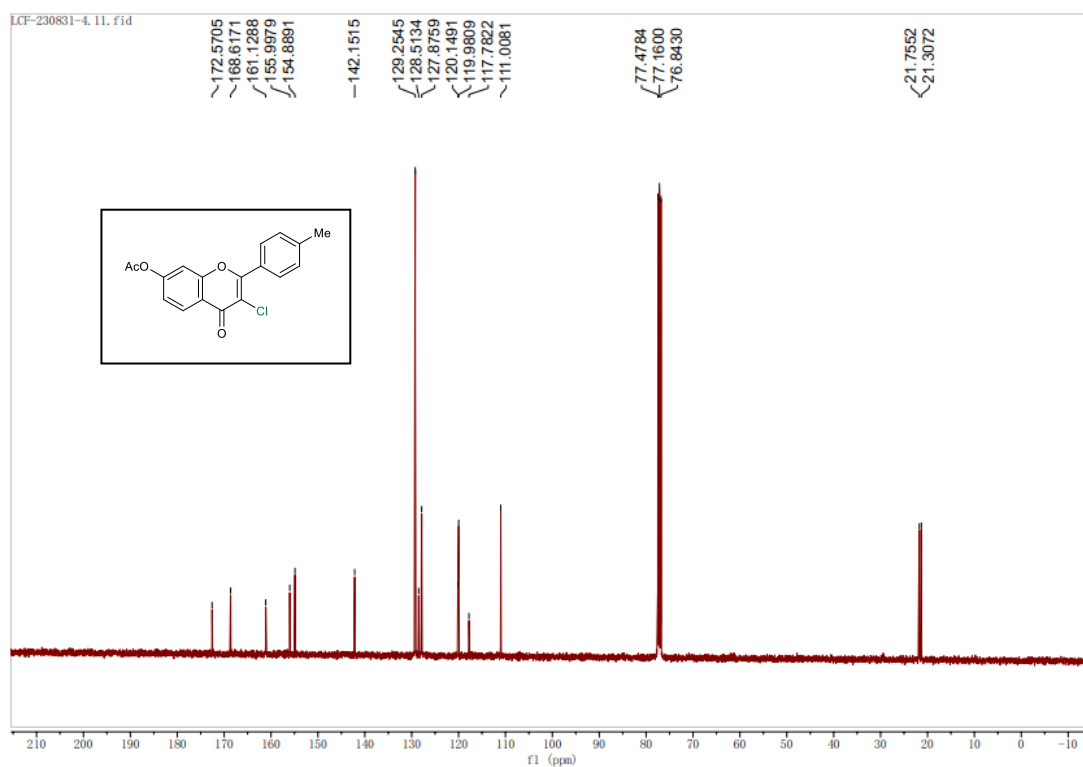

$^{13}\text{C}$  NMR Spectra of compound **2al** in  $\text{CDCl}_3$  (101 MHz)

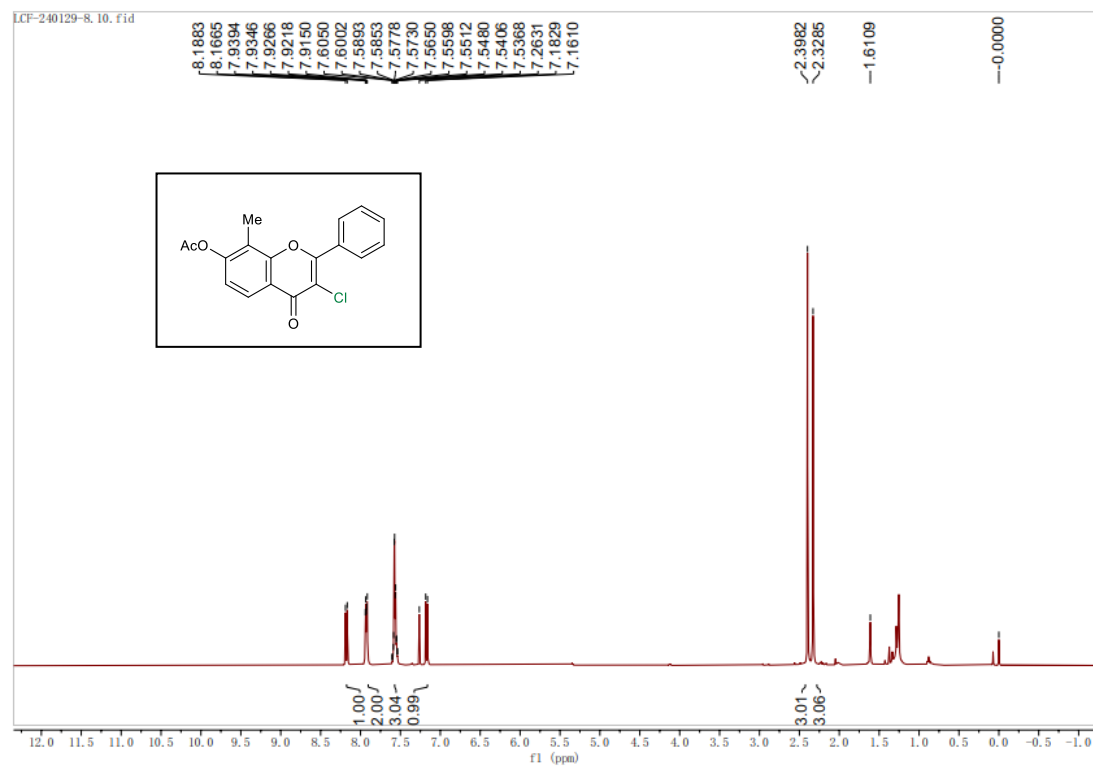

$^1\text{H}$  NMR Spectra of compound **2am** in  $\text{CDCl}_3$  (400 MHz)

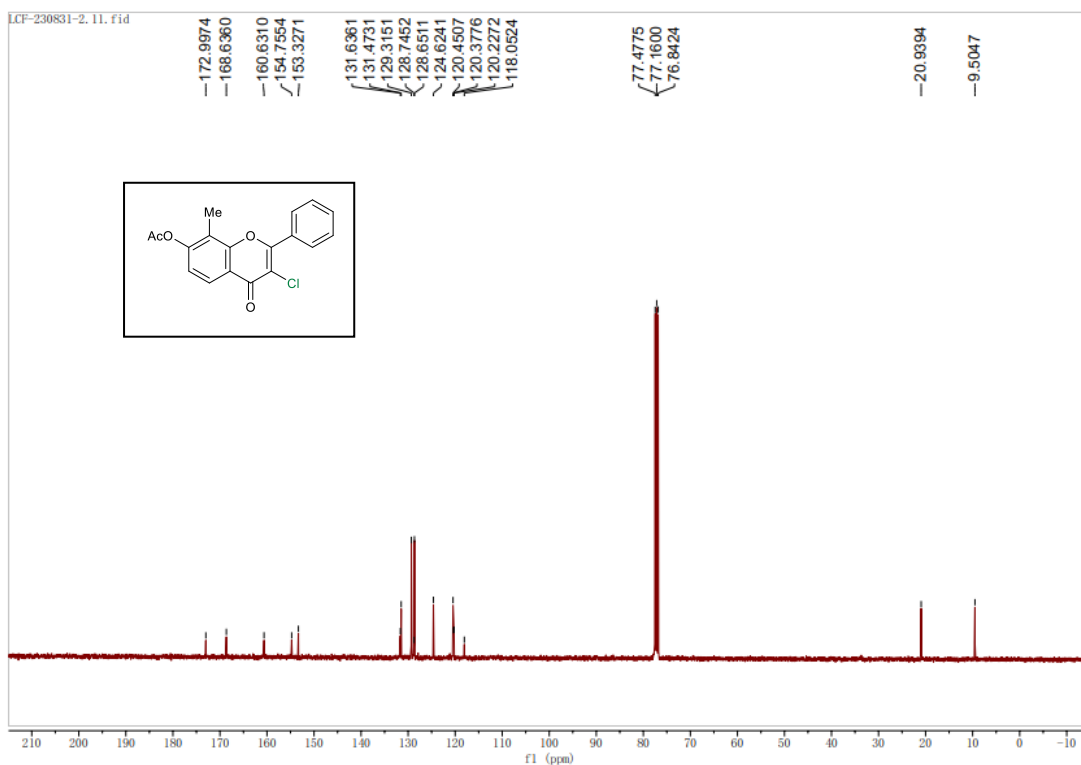

$^{13}\text{C}$  NMR Spectra of compound **2am** in  $\text{CDCl}_3$  (101 MHz)

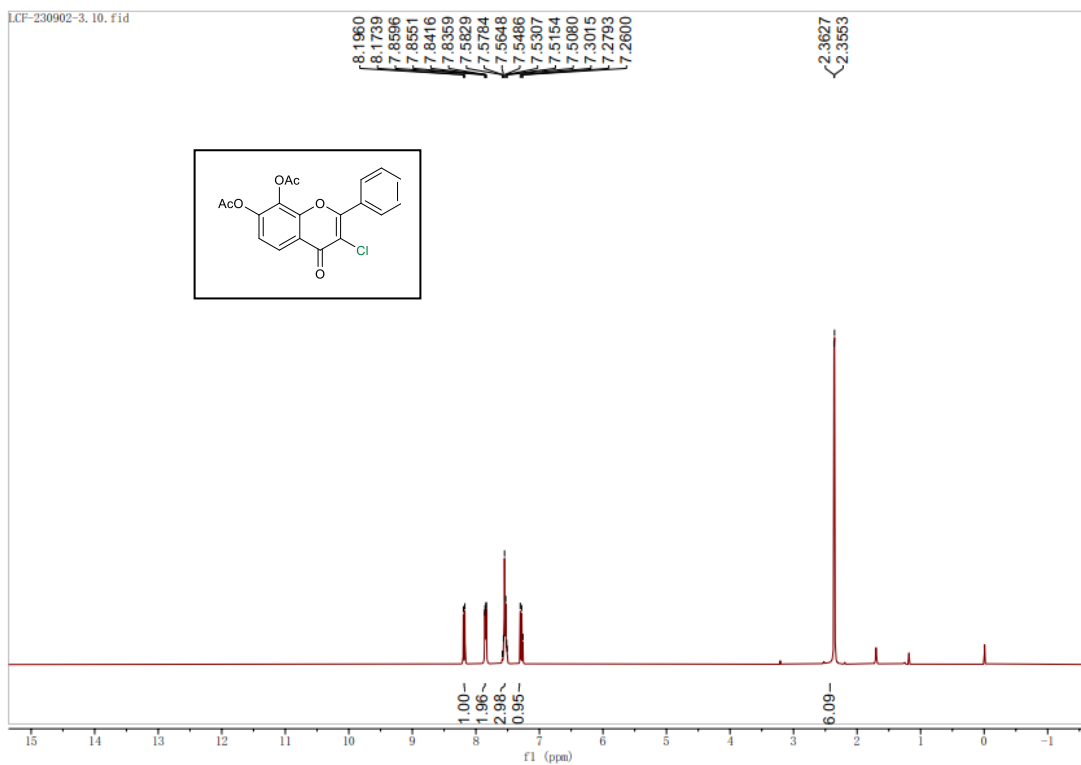

$^1\text{H}$  NMR Spectra of compound **2am** in  $\text{CDCl}_3$  (400 MHz)

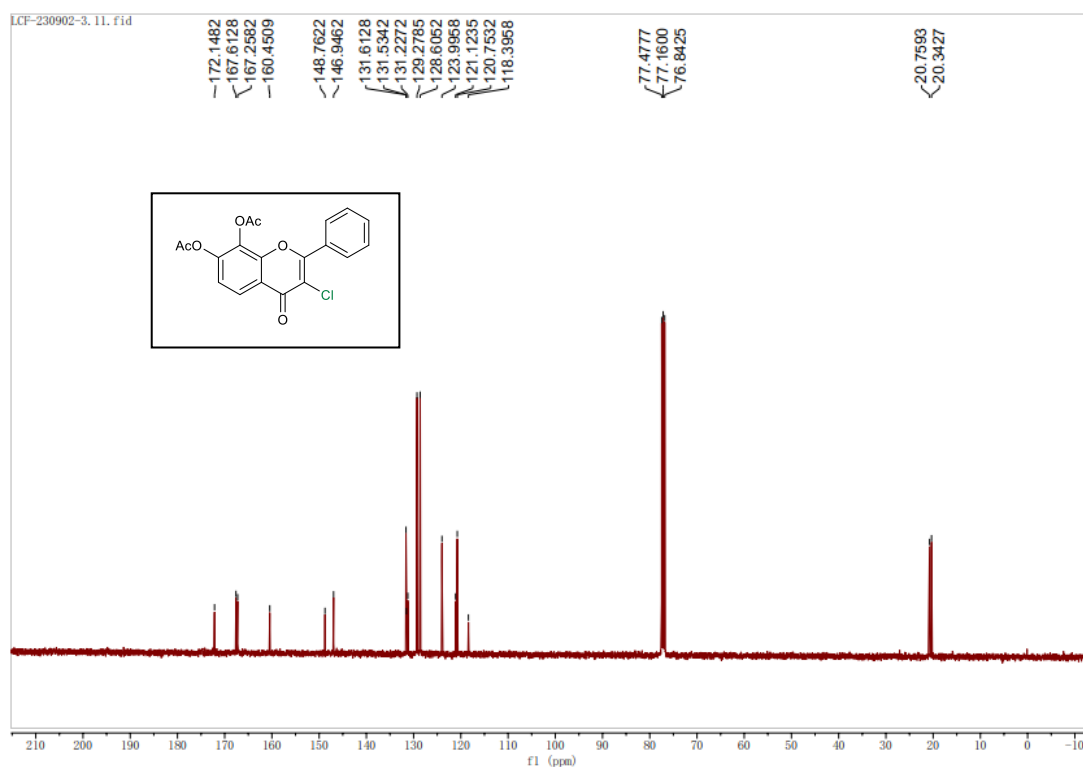

$^{13}\text{C}$  NMR Spectra of compound **2an** in  $\text{CDCl}_3$  (101 MHz)

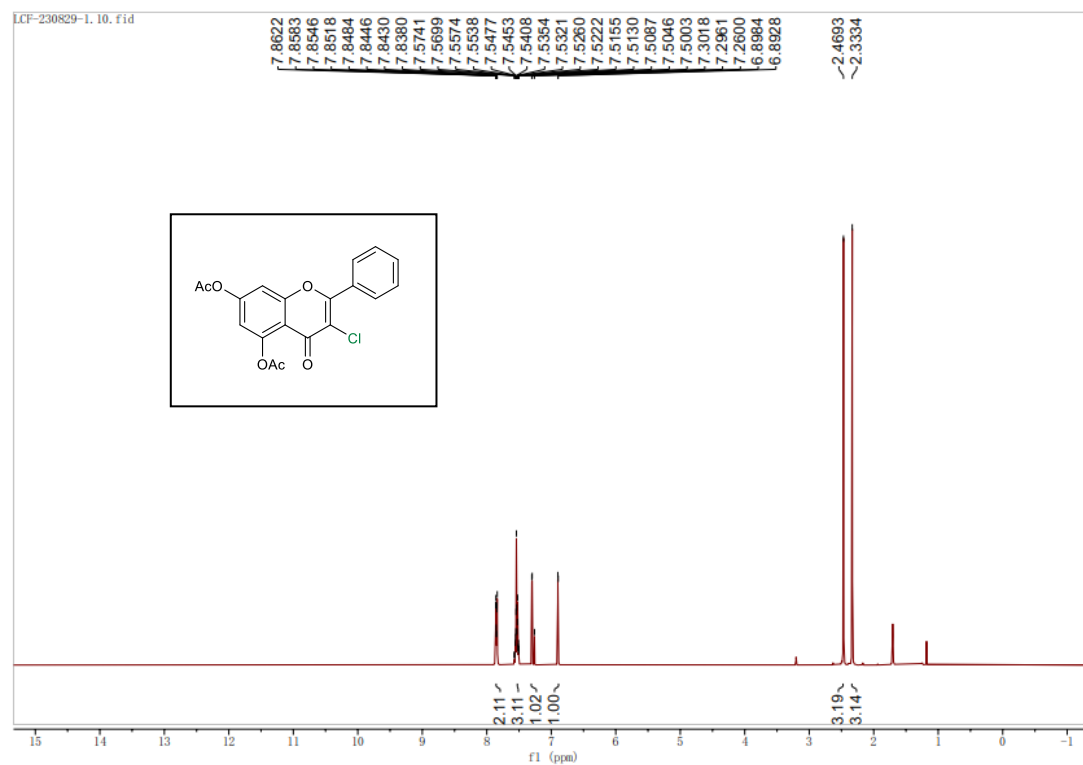

$^1\text{H}$  NMR Spectra of compound **2ao** in  $\text{CDCl}_3$  (400 MHz)

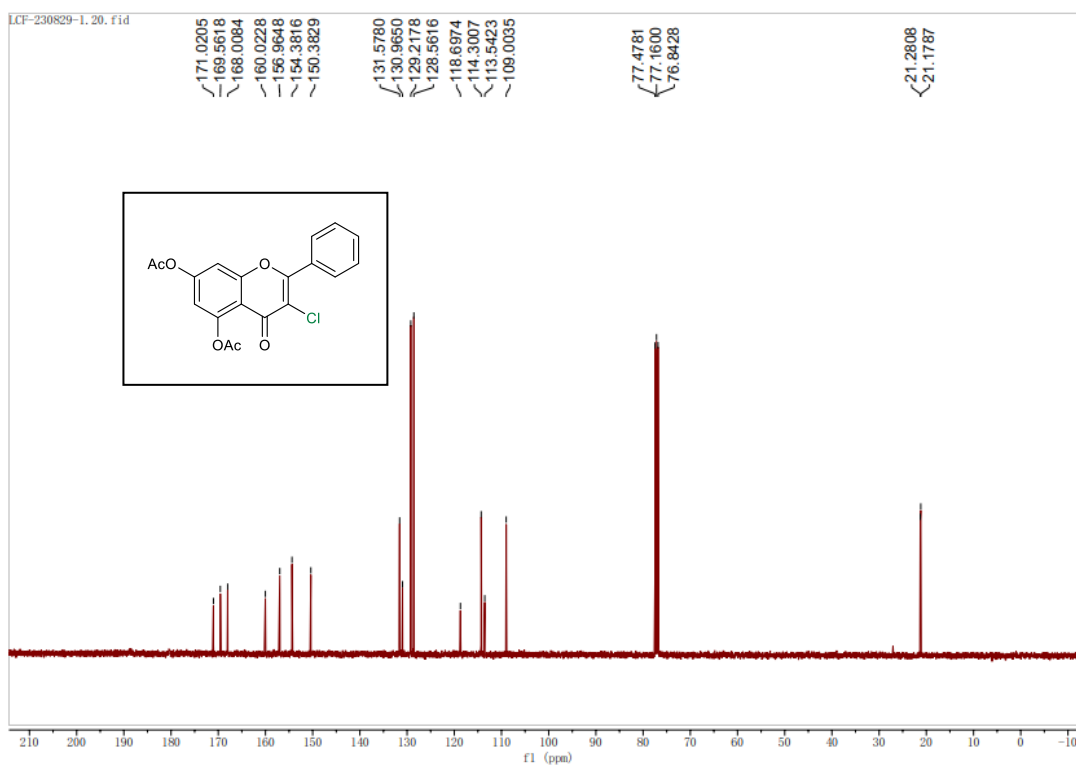

$^{13}\text{C}$  NMR Spectra of compound **2ao** in  $\text{CDCl}_3$  (101 MHz)

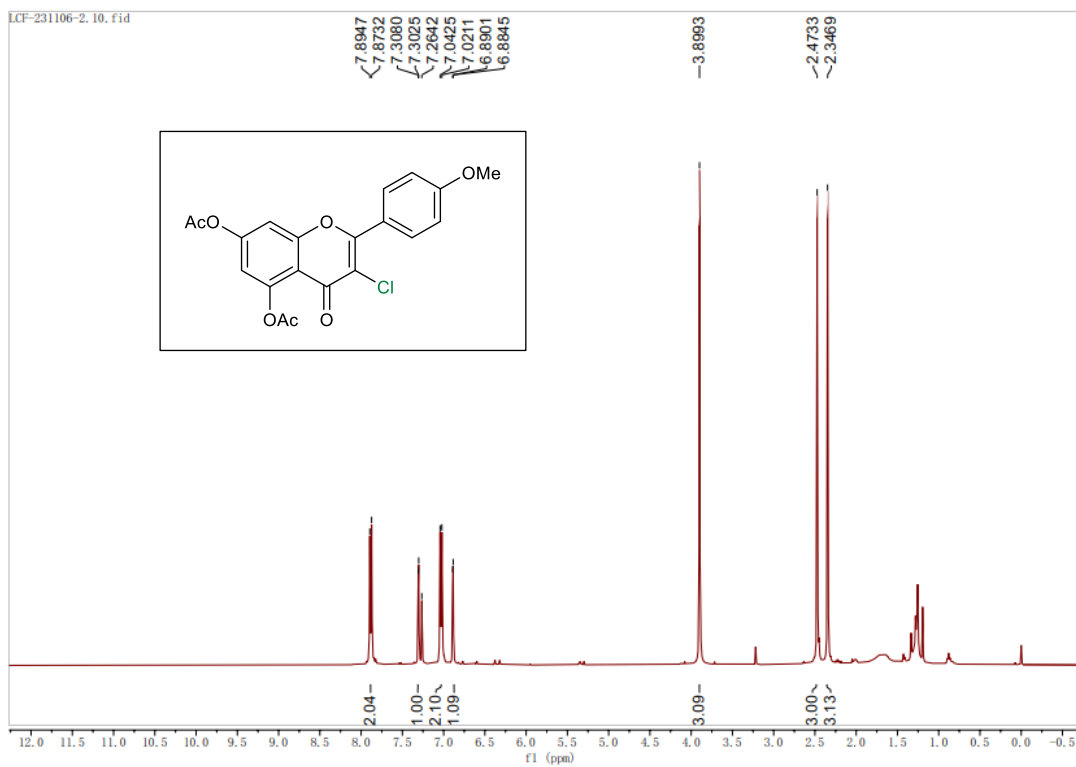

$^1\text{H}$  NMR Spectra of compound **2ap** in  $\text{CDCl}_3$  (400 MHz)

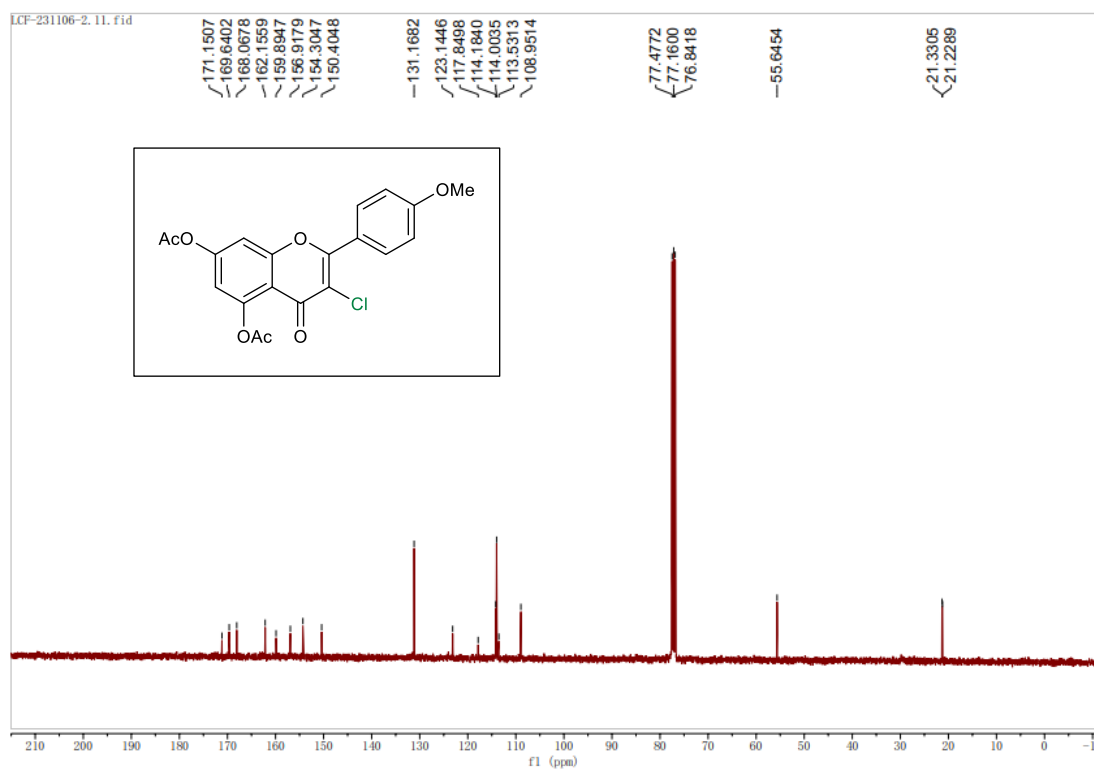

$^{13}\text{C}$  NMR Spectra of compound **2ap** in  $\text{CDCl}_3$  (101 MHz)

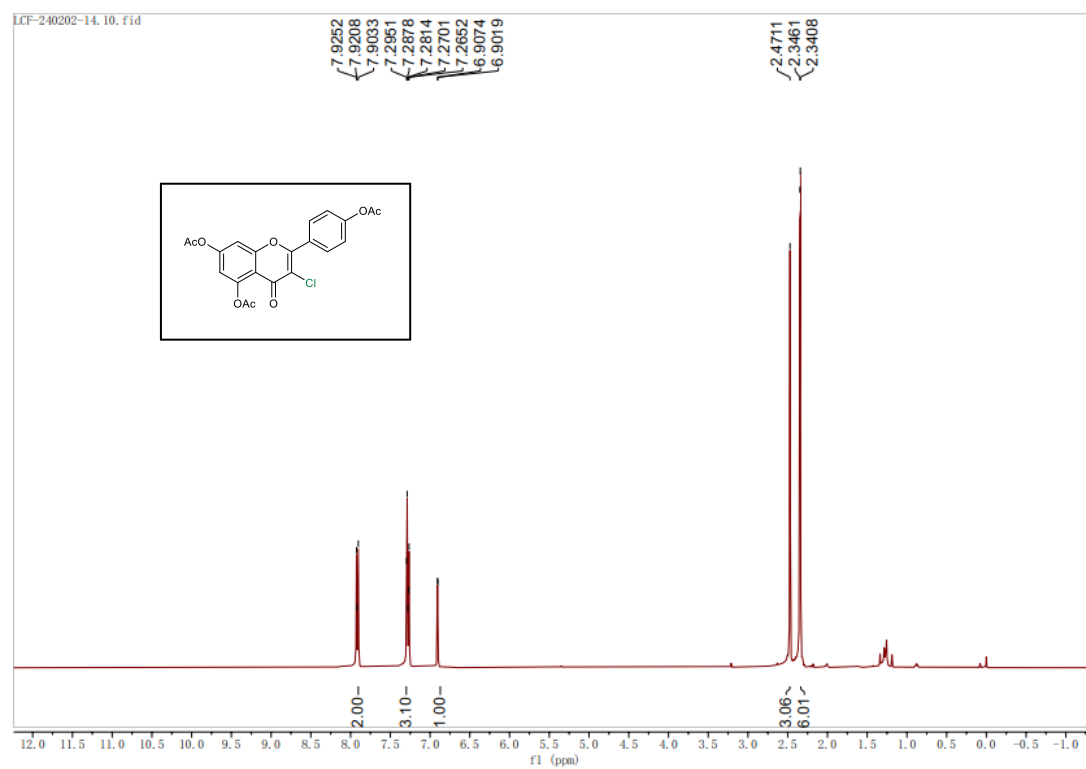

$^1\text{H}$  NMR Spectra of compound **2aq** in  $\text{CDCl}_3$  (400 MHz)



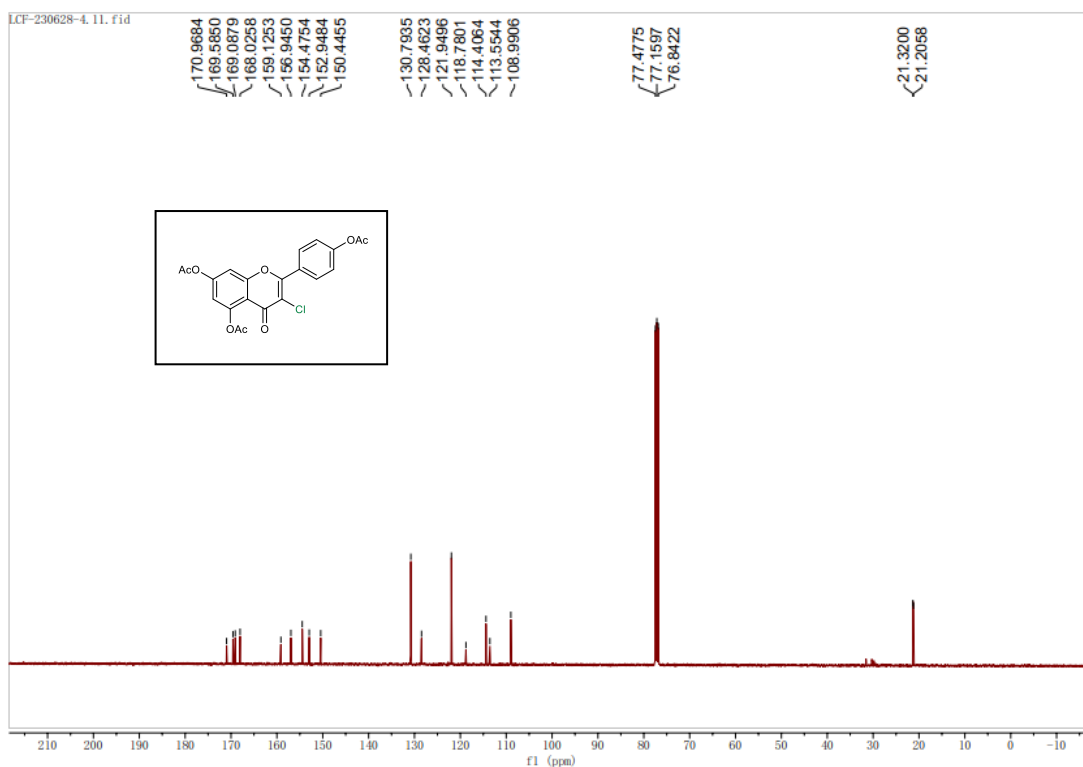

$^{13}\text{C}$  NMR Spectra of compound **2aq** in  $\text{CDCl}_3$  (101 MHz)

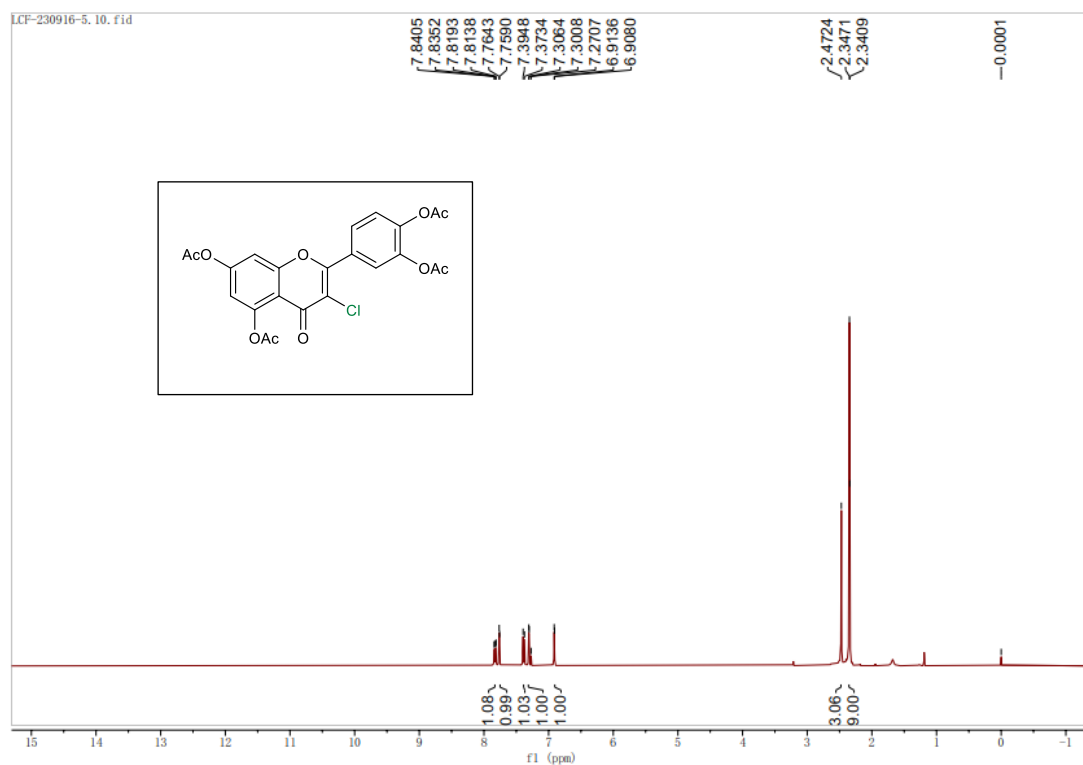

$^1\text{H}$  NMR Spectra of compound **2ar** in  $\text{CDCl}_3$  (400 MHz)

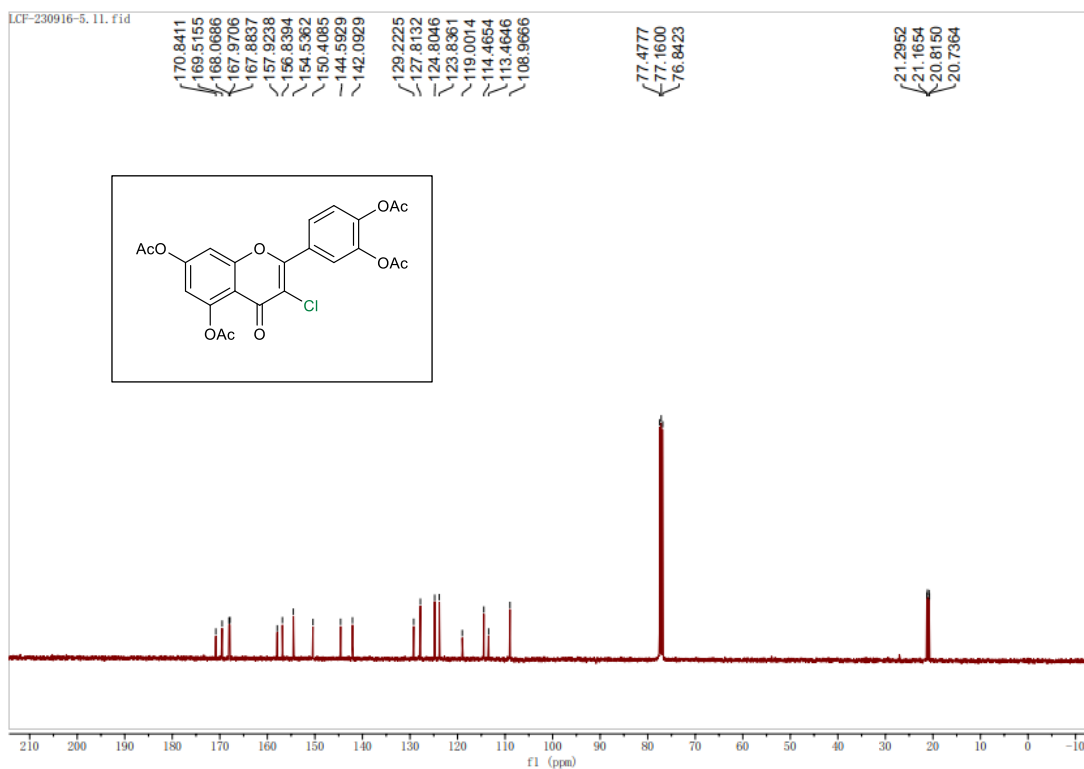

$^{13}\text{C}$  NMR Spectra of compound **2ar** in  $\text{CDCl}_3$  (101 MHz)

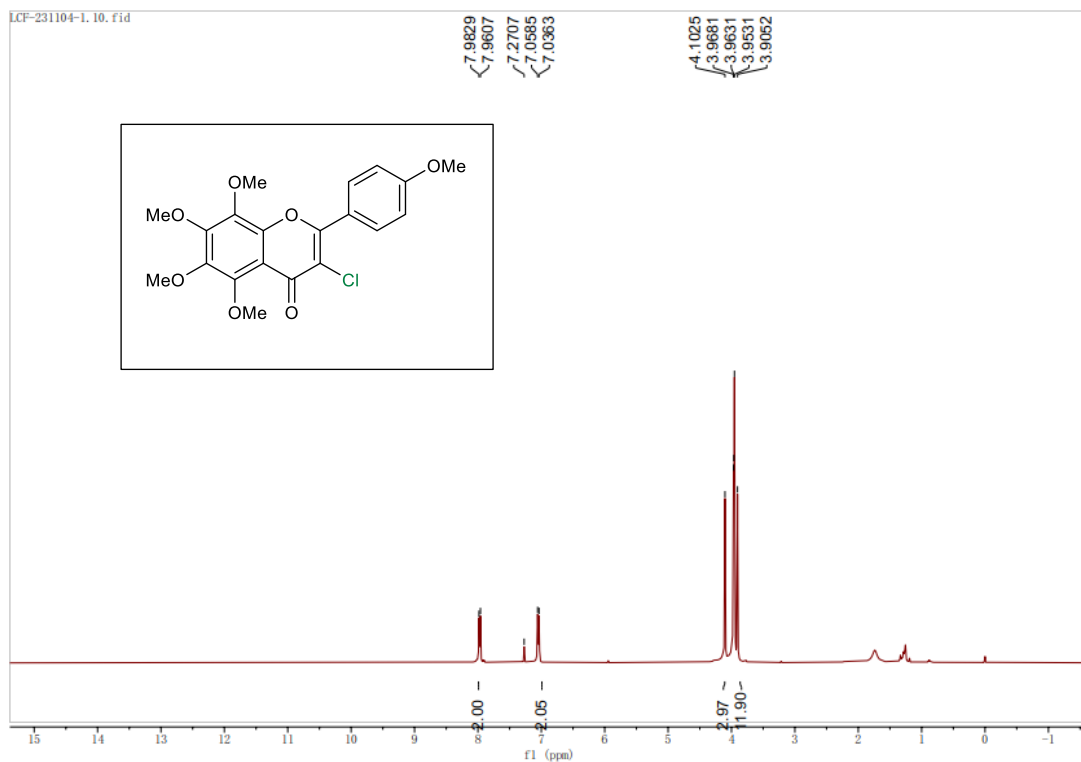

$^1\text{H}$  NMR Spectra of compound **2as** in  $\text{CDCl}_3$  (400 MHz)

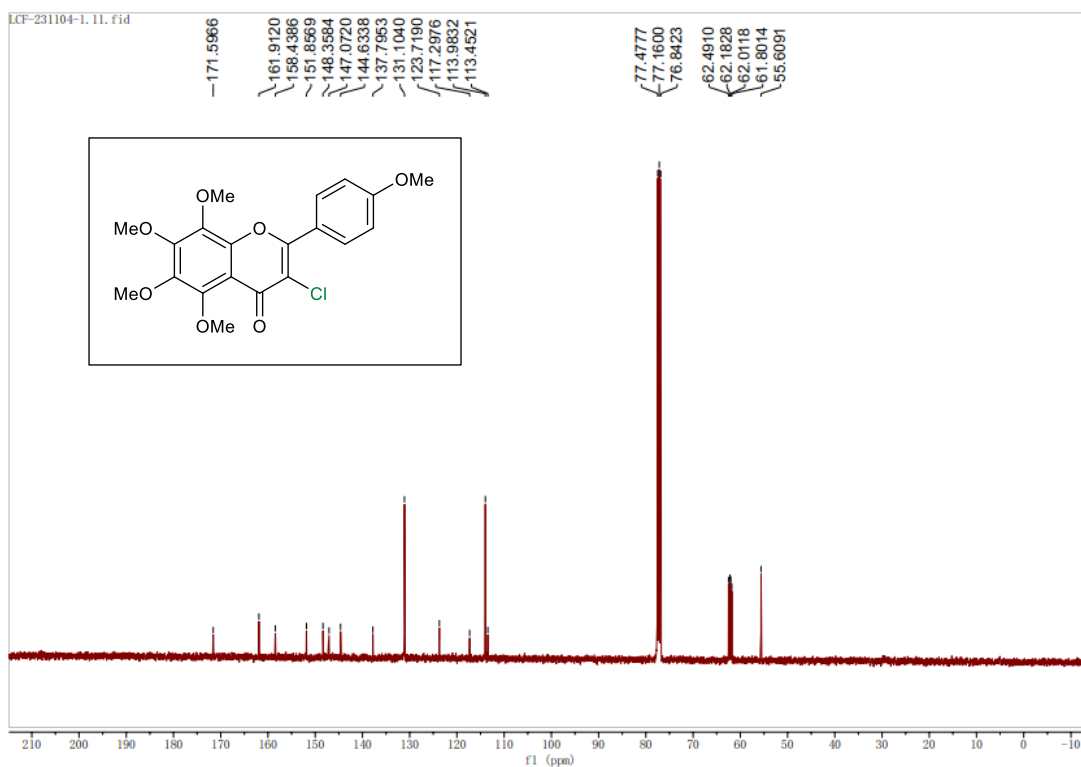

<sup>13</sup>C NMR Spectra of compound **2as** in CDCl<sub>3</sub> (101 MHz)

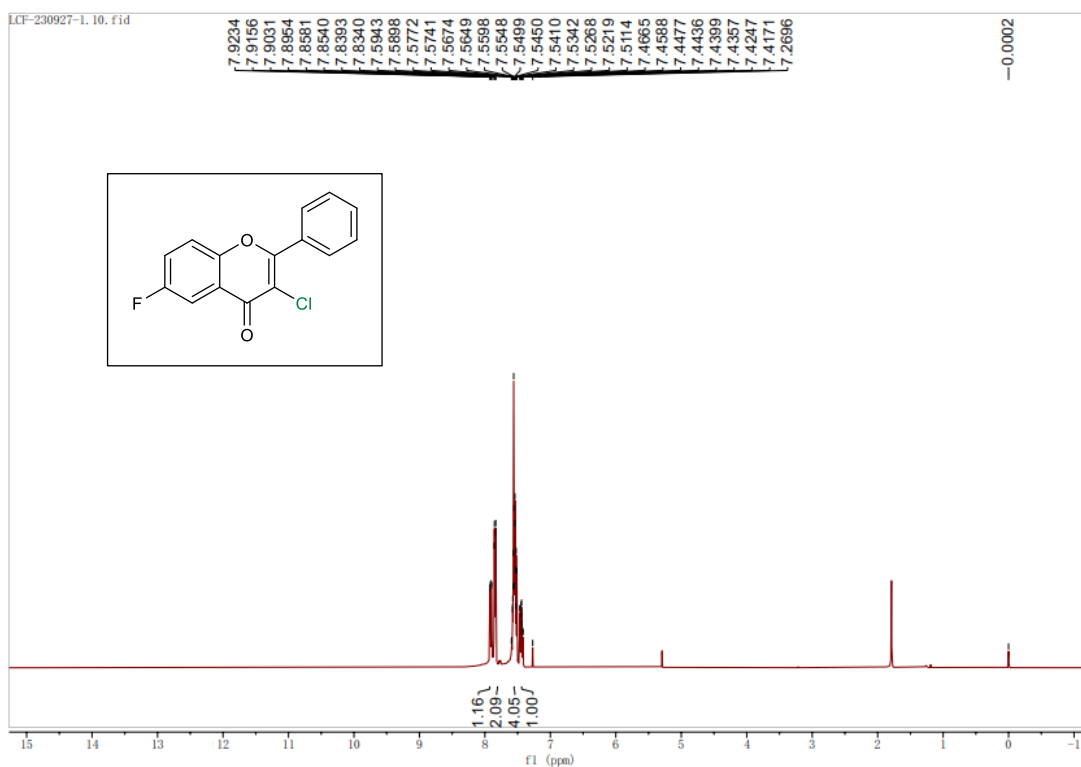

<sup>1</sup>H NMR Spectra of compound **2at** in CDCl<sub>3</sub> (400 MHz)

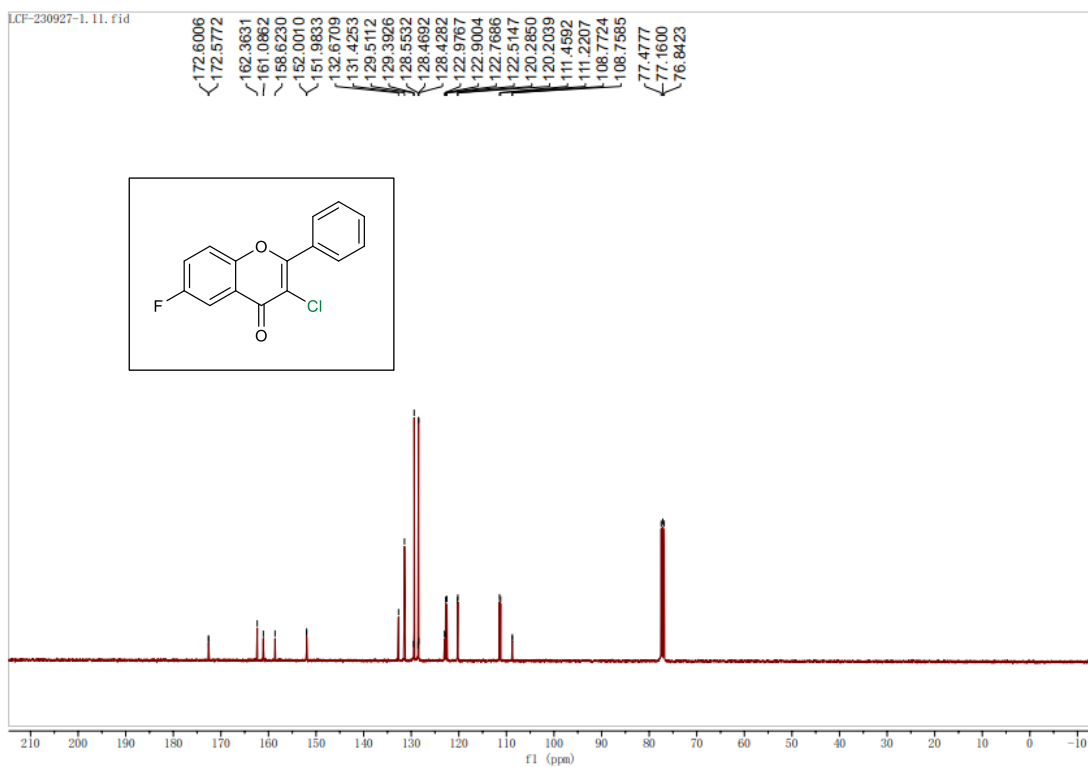

$^{13}\text{C}$  NMR Spectra of compound **2at** in  $\text{CDCl}_3$  (101 MHz)

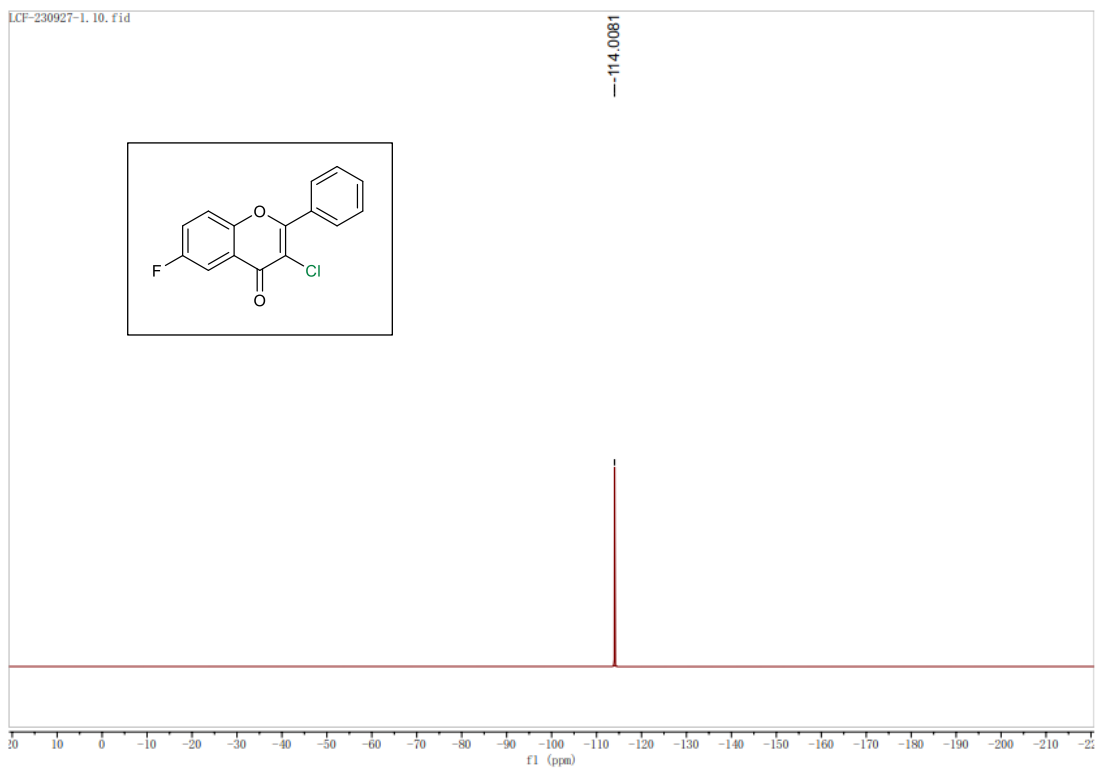

$^{19}\text{F}$  NMR Spectra of compound **2at** in  $\text{CDCl}_3$  (377 MHz)

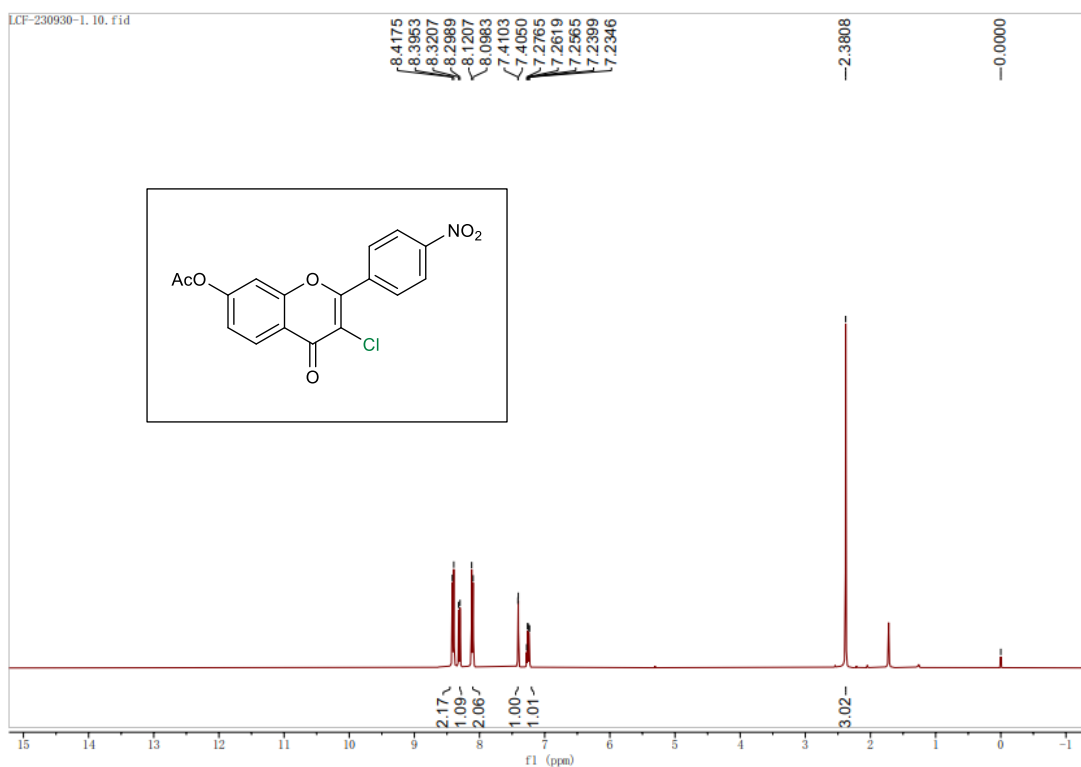

<sup>1</sup>H NMR Spectra of compound **2au** in CDCl<sub>3</sub> (400 MHz)

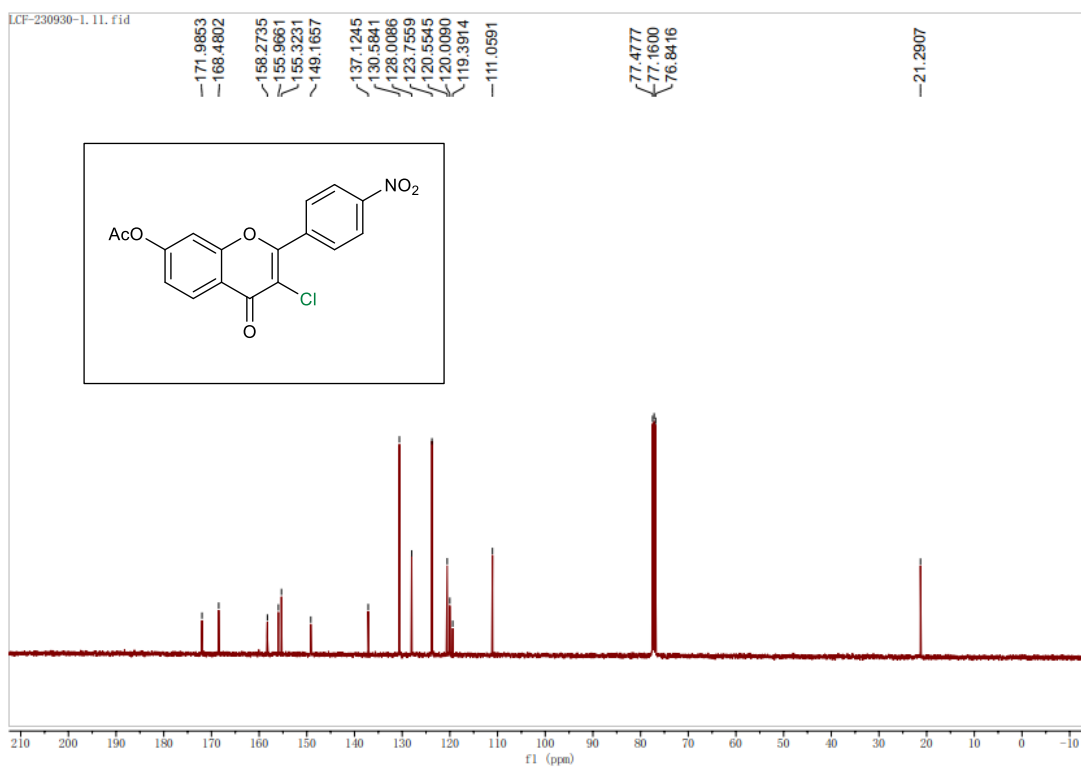

<sup>13</sup>C NMR Spectra of compound **2au** in CDCl<sub>3</sub> (101 MHz)

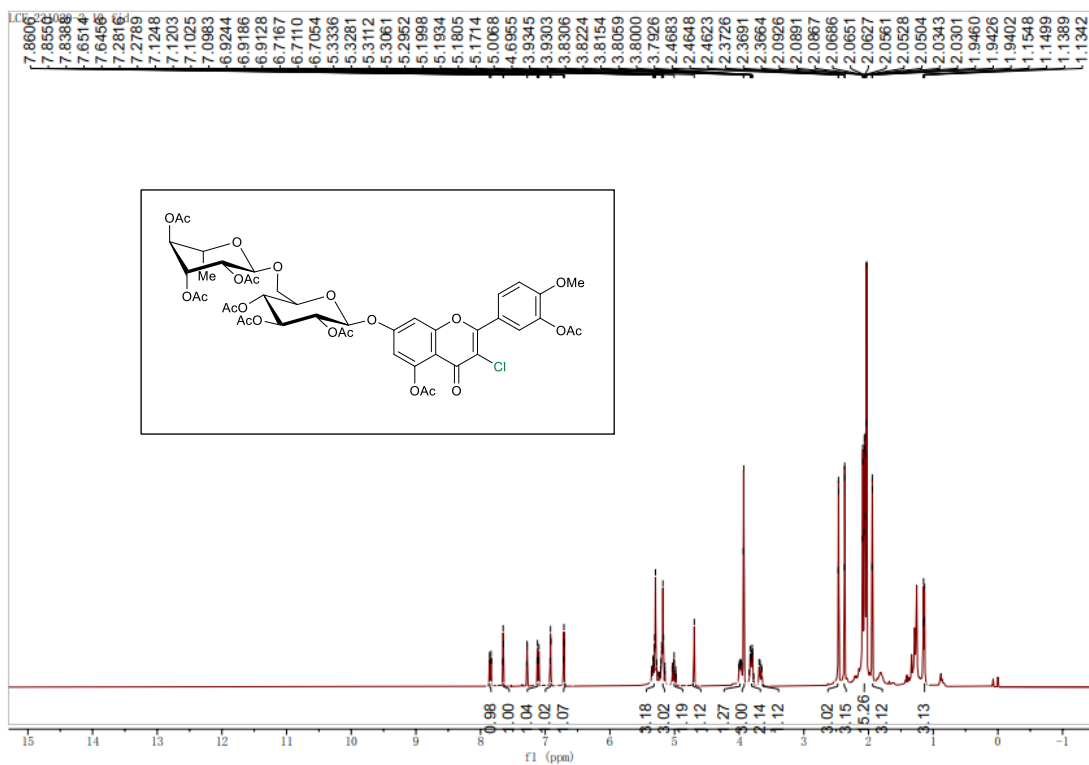

<sup>1</sup>H NMR Spectra of compound **2av** in CDCl<sub>3</sub> (400 MHz)

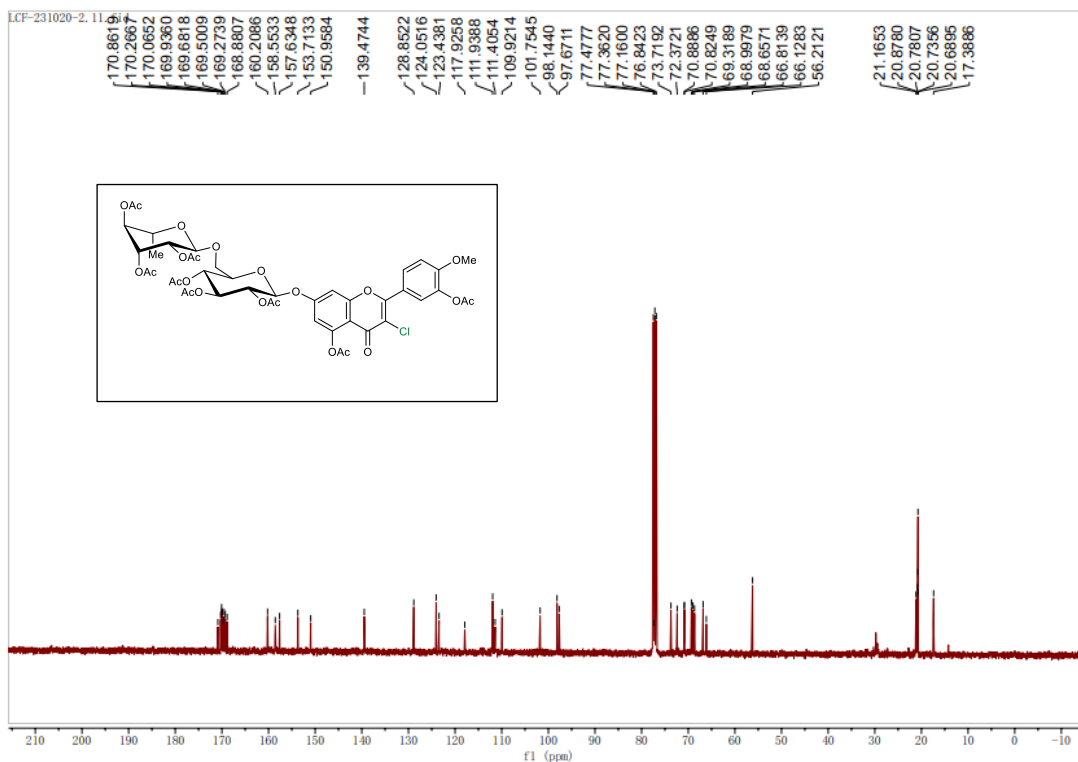

<sup>13</sup>C NMR Spectra of compound **2av** in CDCl<sub>3</sub> (101 MHz)

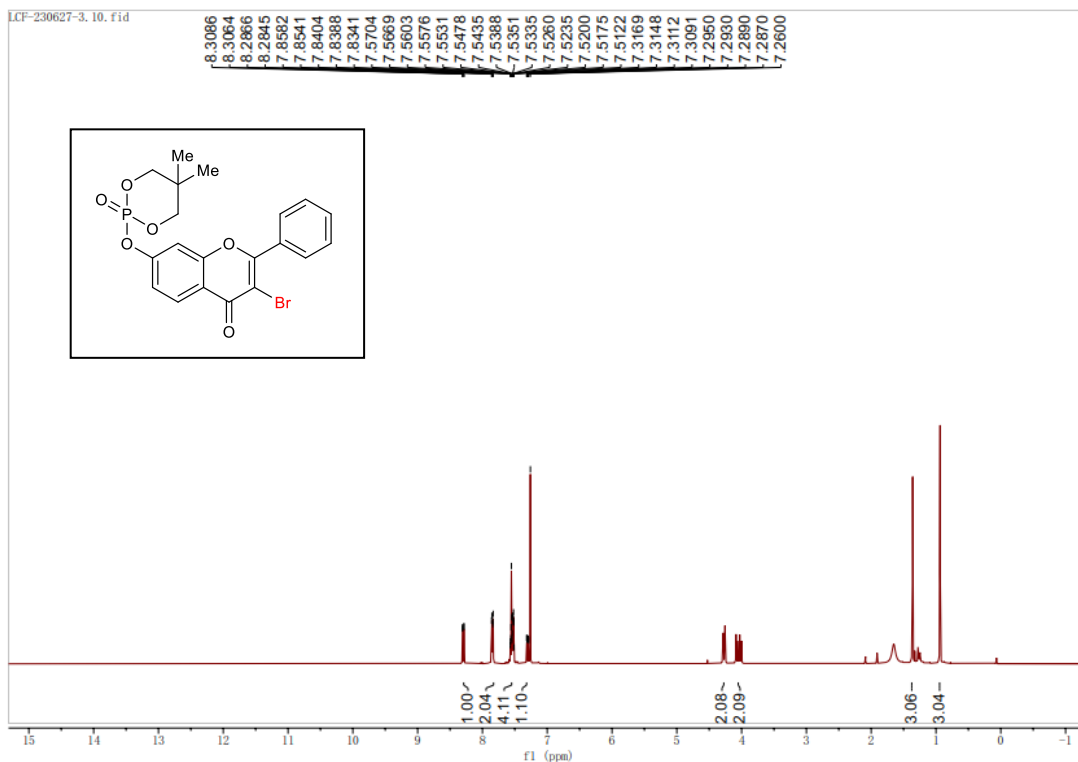

$^1\text{H}$  NMR Spectra of compound **2ba** in  $\text{CDCl}_3$  (400 MHz)

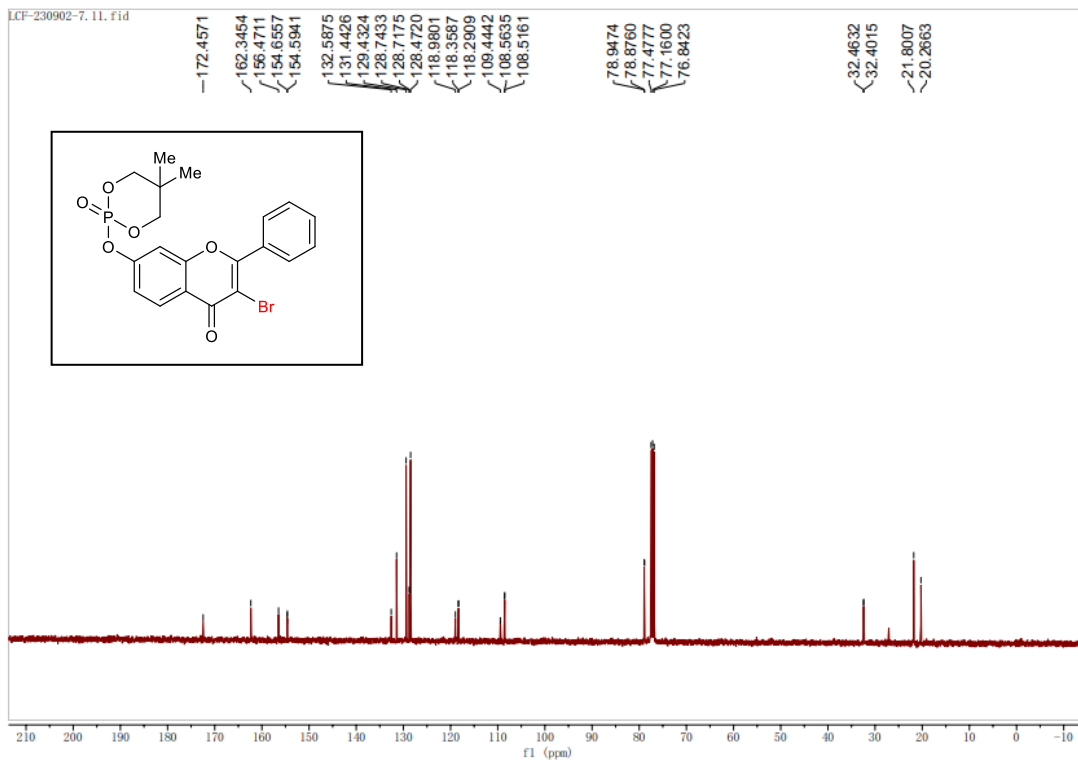

$^{13}\text{C}$  NMR Spectra of compound **2ba** in  $\text{CDCl}_3$  (101 MHz)

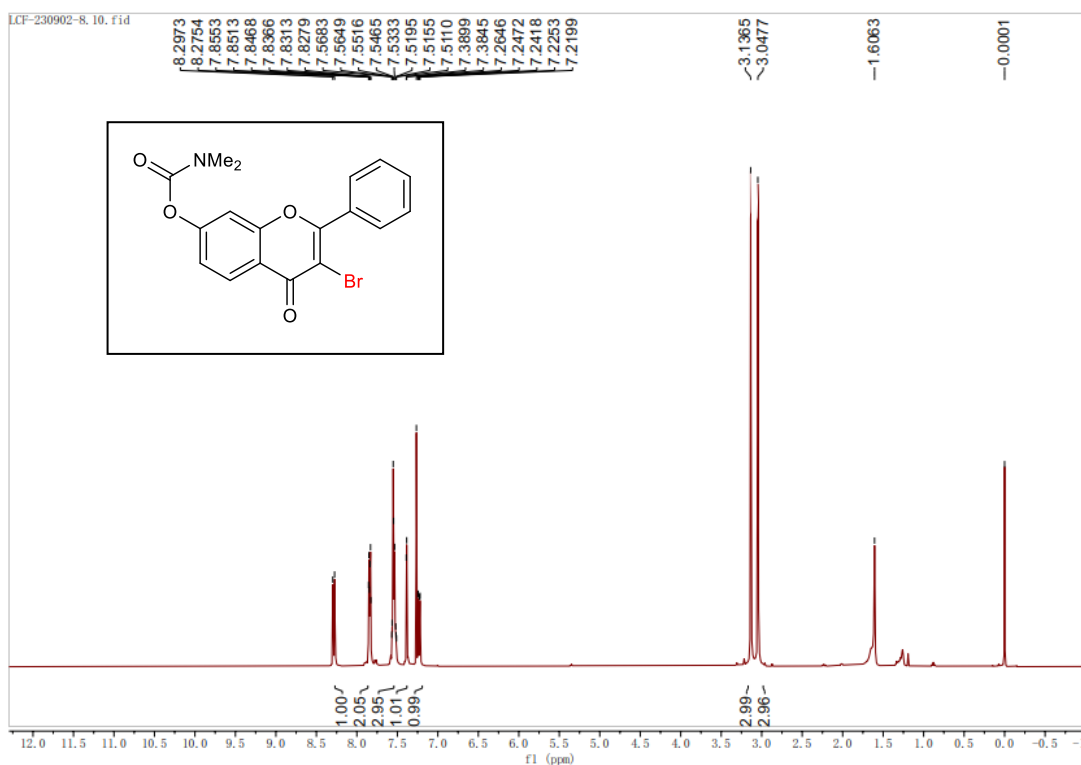

<sup>1</sup>H NMR Spectra of compound **2bb** in CDCl<sub>3</sub> (400 MHz)

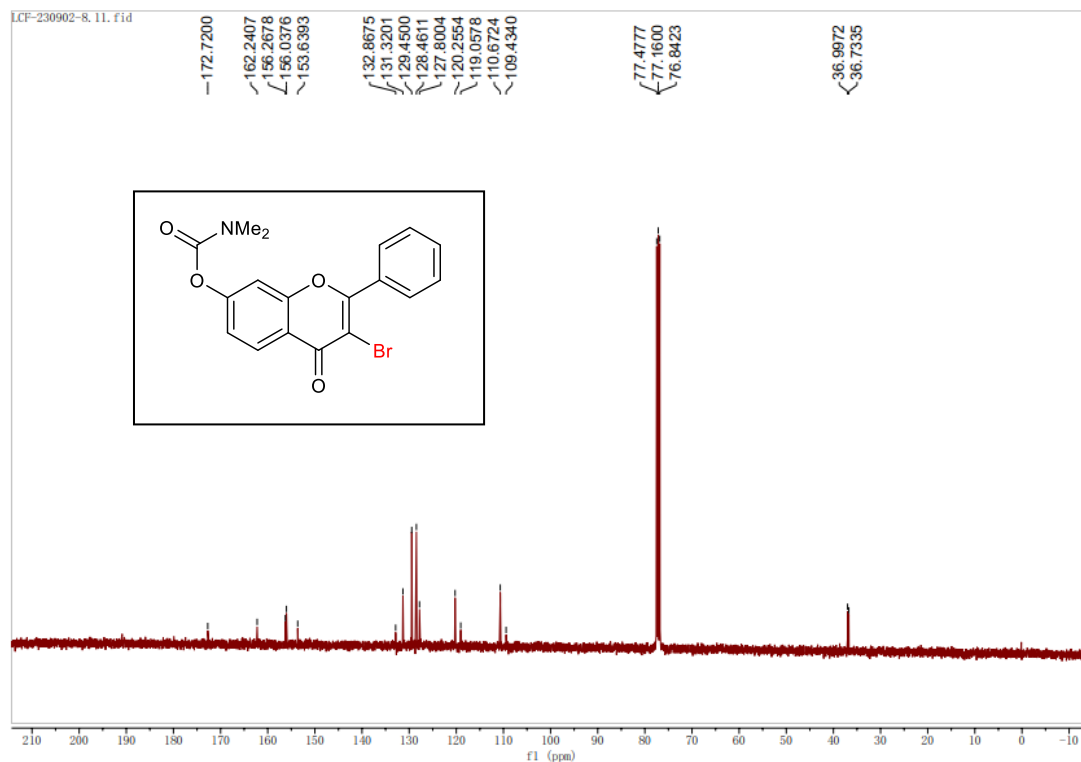

<sup>13</sup>C NMR Spectra of compound **2bb** in CDCl<sub>3</sub> (101 MHz)



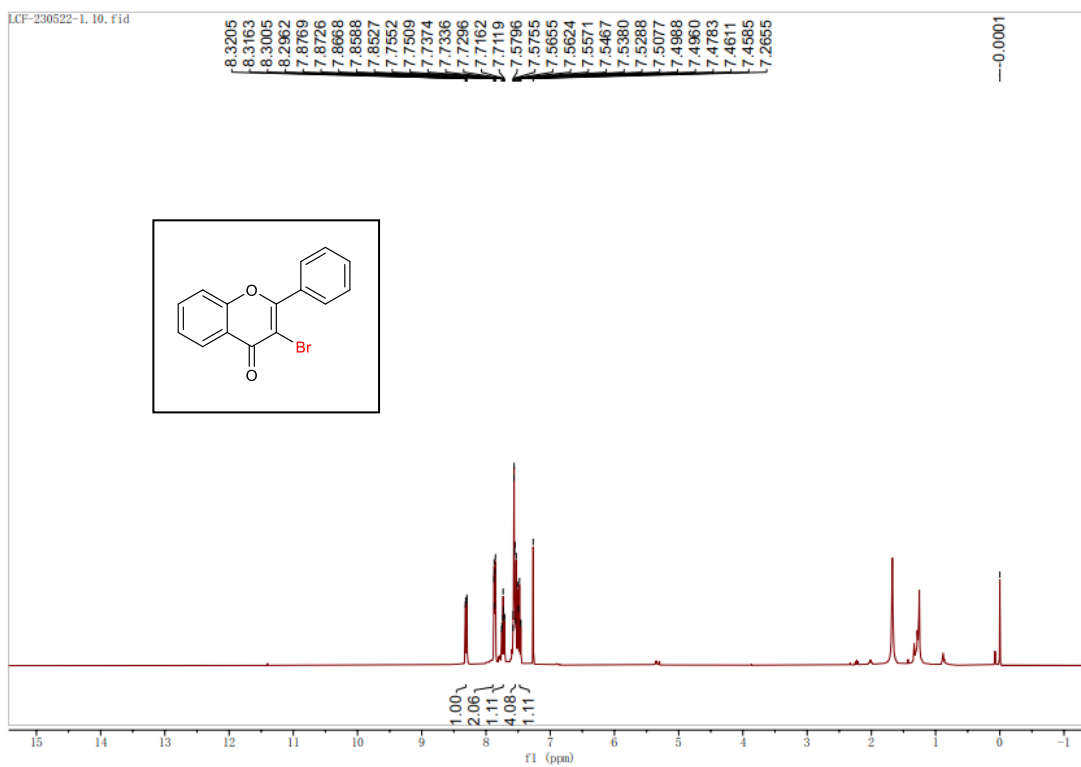

$^1\text{H}$  NMR Spectra of compound **2bc** in  $\text{CDCl}_3$  (400 MHz)

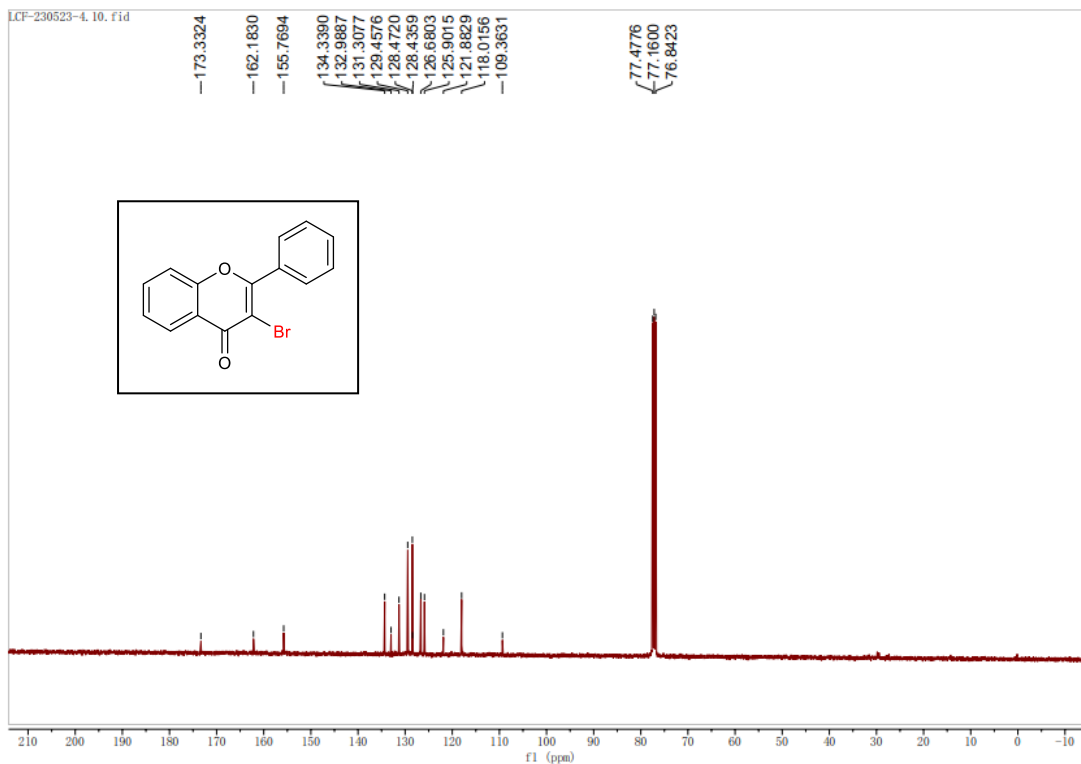

$^{13}\text{C}$  NMR Spectra of compound **2bc** in  $\text{CDCl}_3$  (101 MHz)

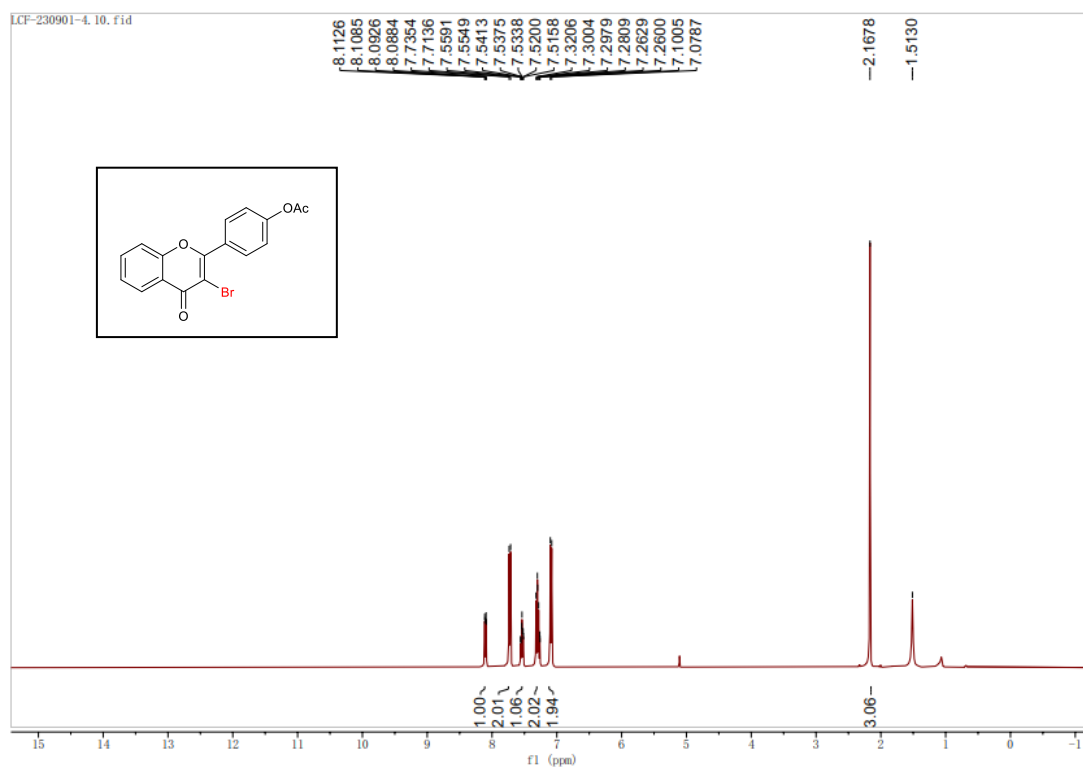

$^1\text{H}$  NMR Spectra of compound **2bd** in  $\text{CDCl}_3$  (400 MHz)

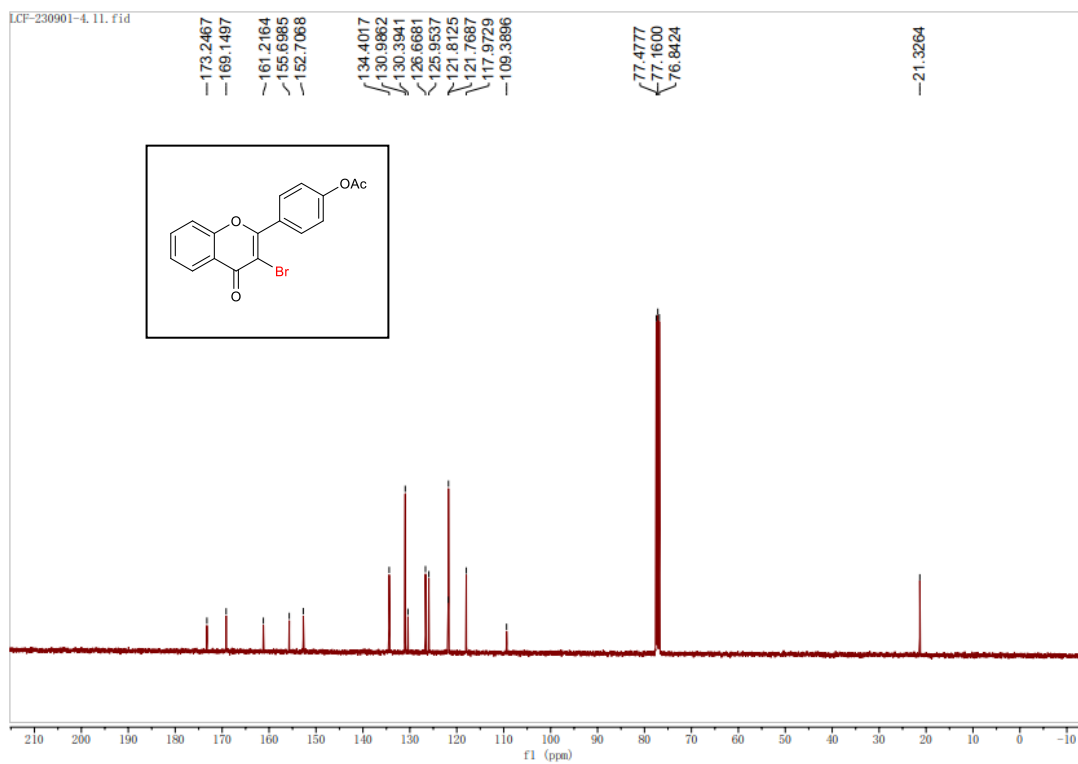

$^{13}\text{C}$  NMR Spectra of compound **2bd** in  $\text{CDCl}_3$  (101 MHz)

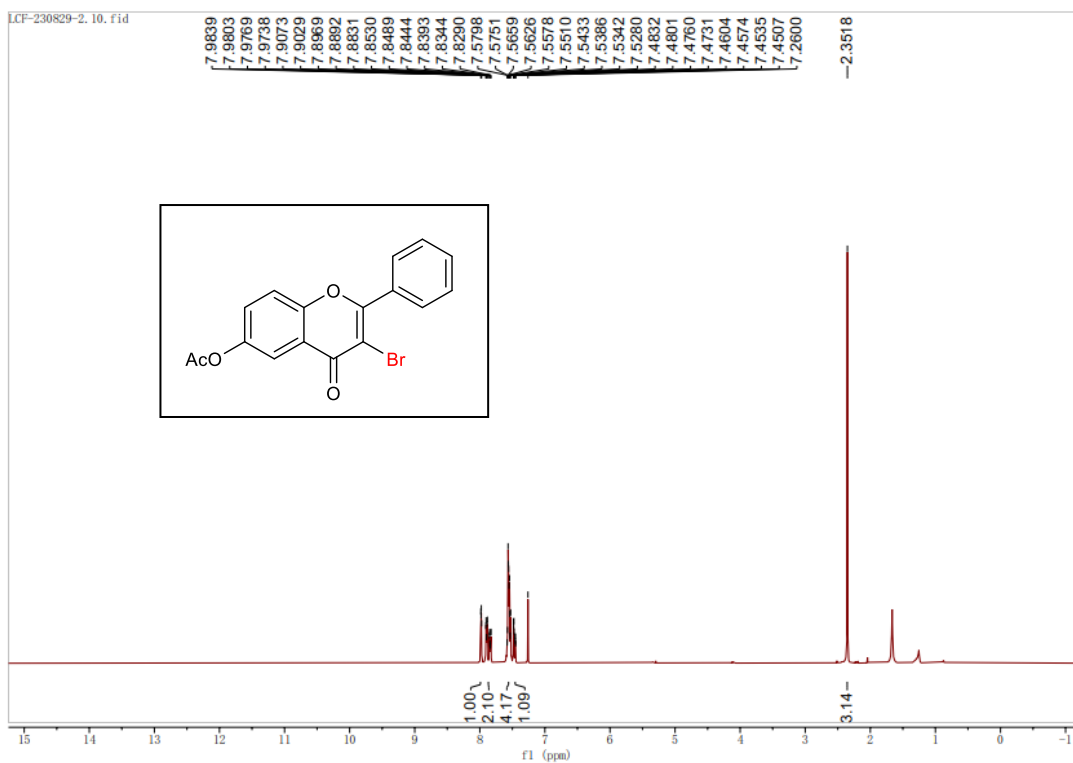

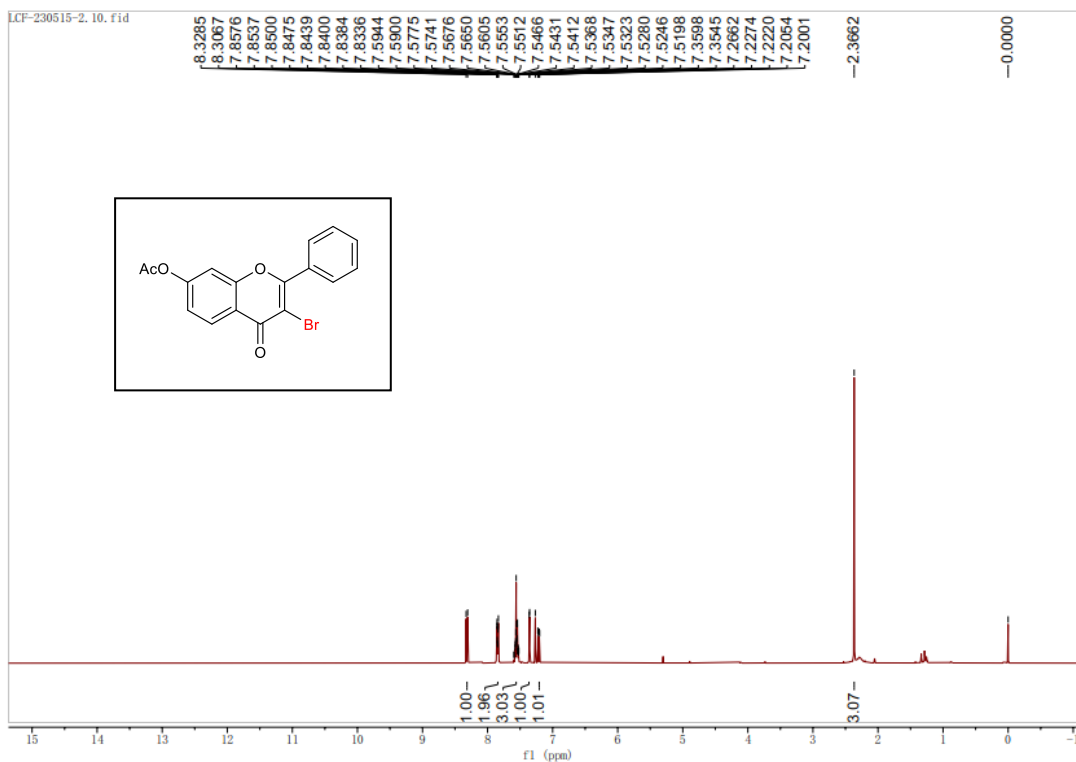

$^1\text{H}$  NMR Spectra of compound **2bf** in  $\text{CDCl}_3$  (400 MHz)

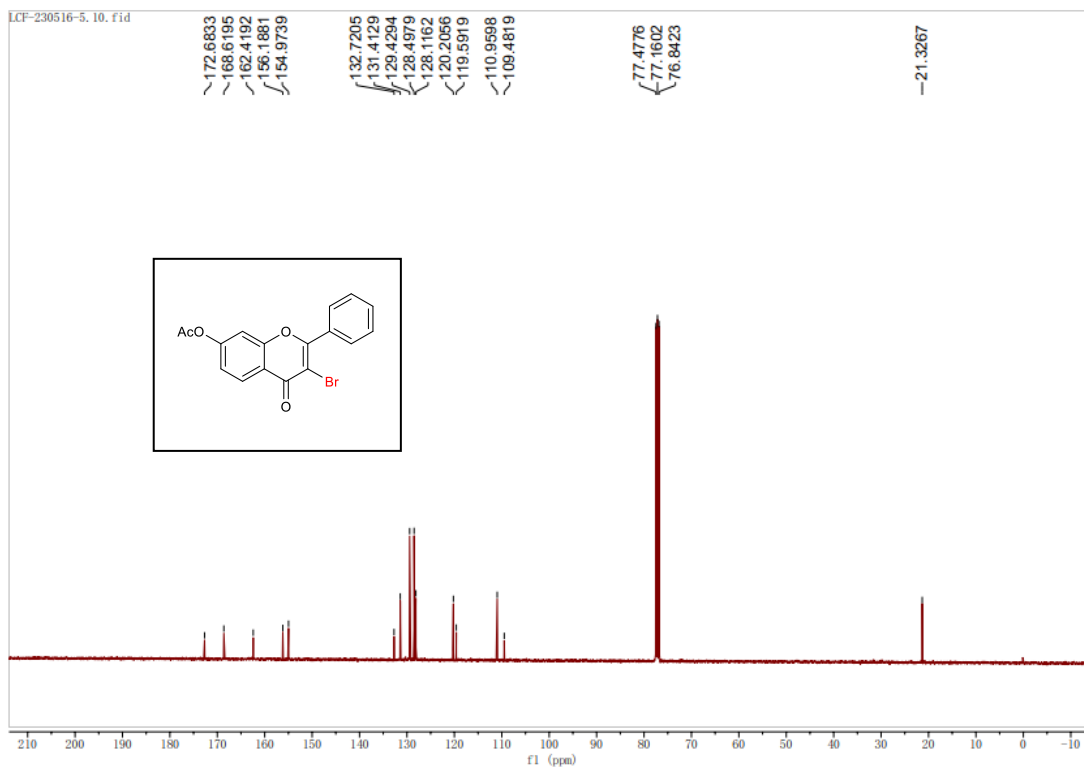

$^{13}\text{C}$  NMR Spectra of compound **2bf** in  $\text{CDCl}_3$  (101 MHz)

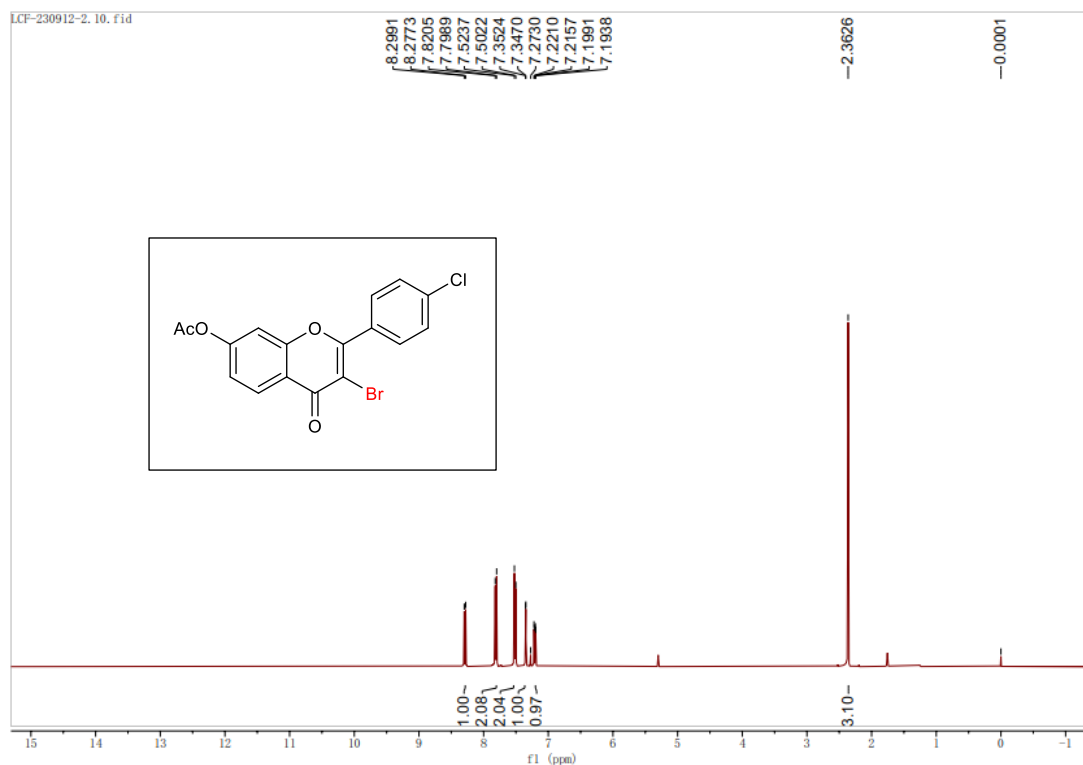

$^1\text{H}$  NMR Spectra of compound **2bg** in  $\text{CDCl}_3$  (400 MHz)

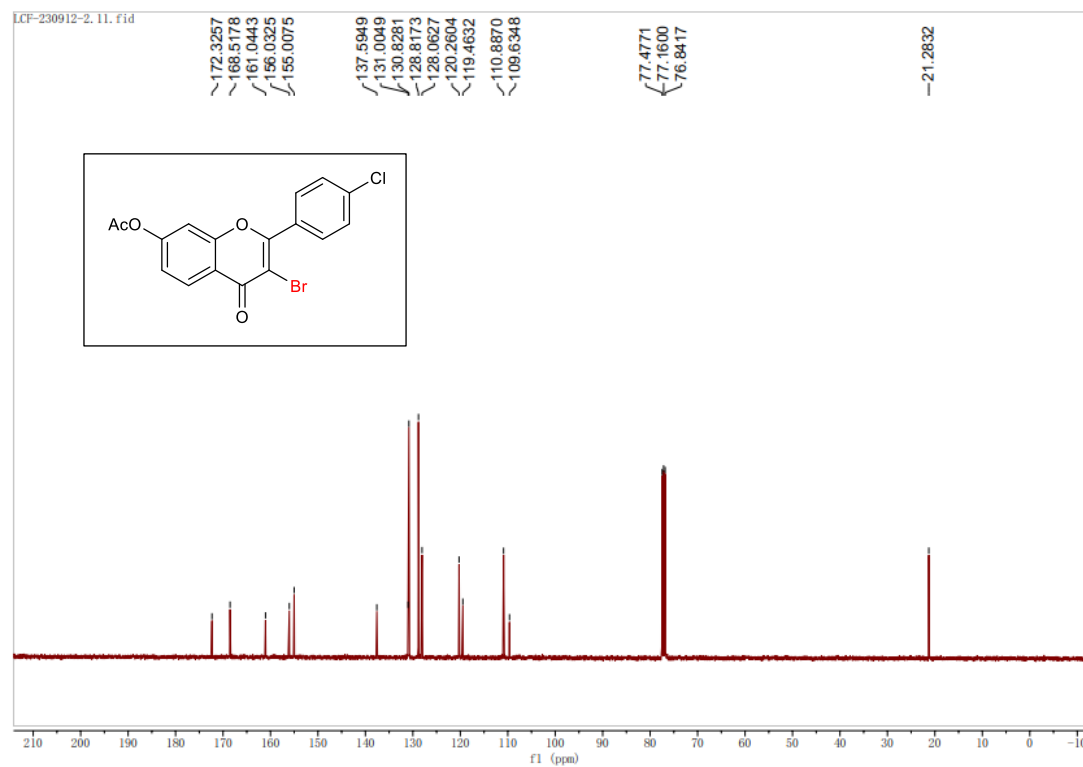

$^{13}\text{C}$  NMR Spectra of compound **2bg** in  $\text{CDCl}_3$  (101 MHz)

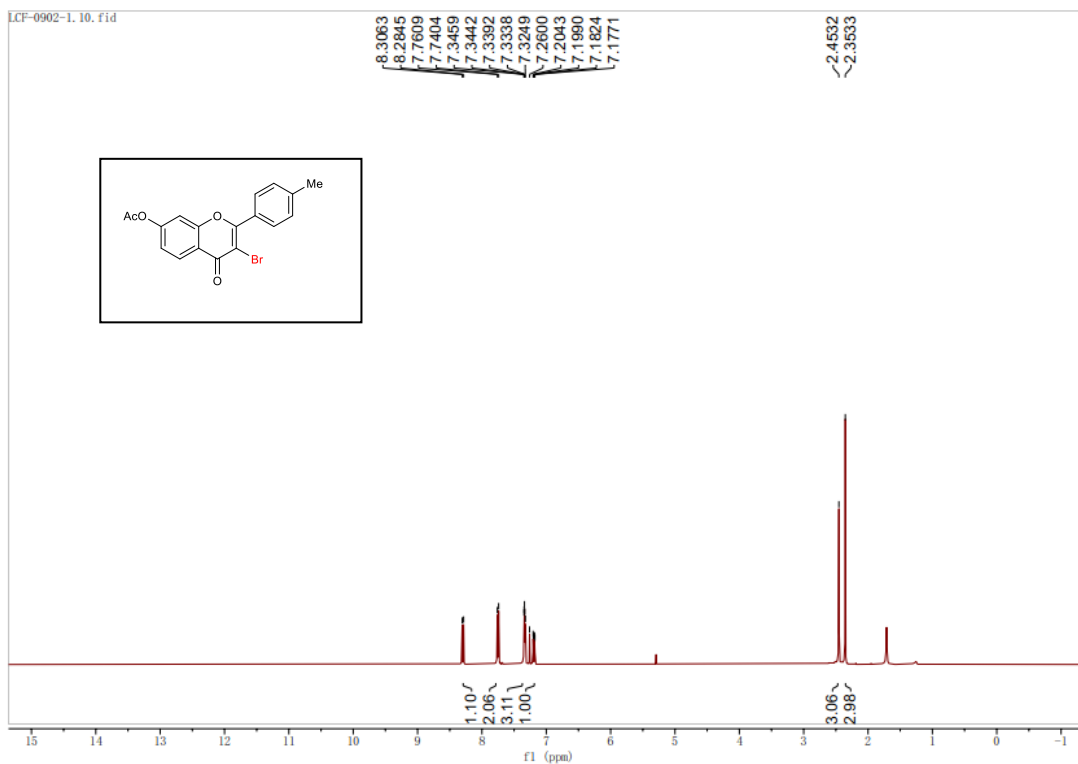

$^1\text{H}$  NMR Spectra of compound **2bh** in  $\text{CDCl}_3$  (400 MHz)

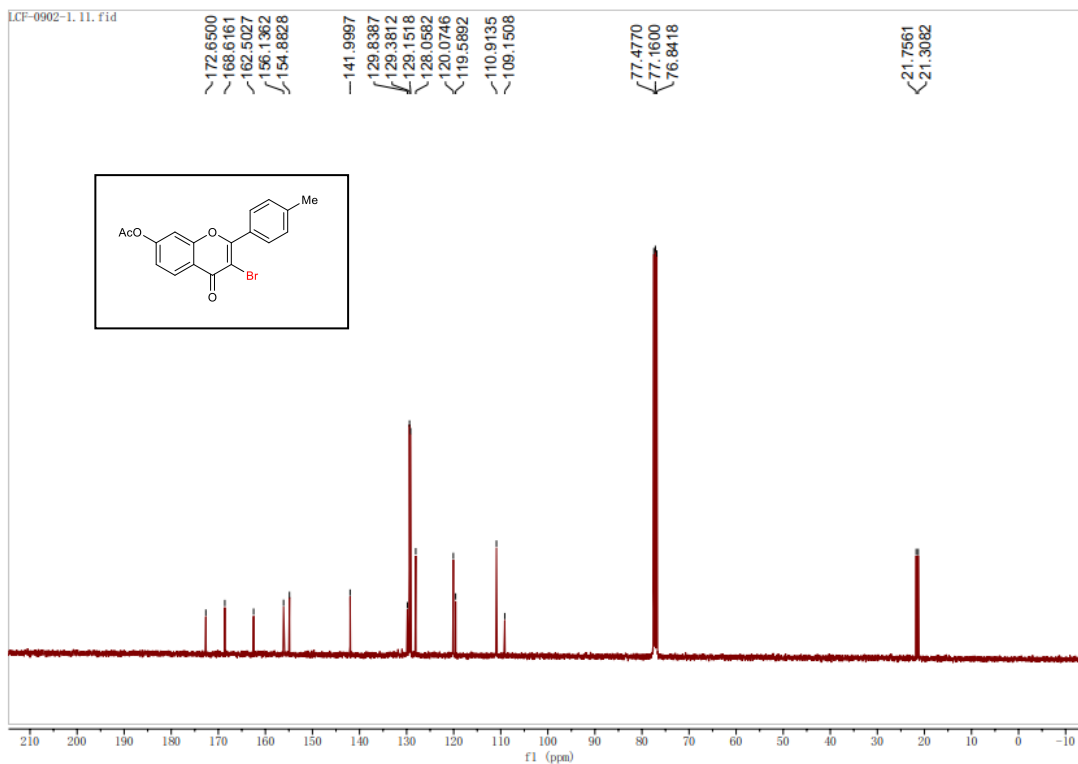

$^{13}\text{C}$  NMR Spectra of compound **2bh** in  $\text{CDCl}_3$  (101 MHz)

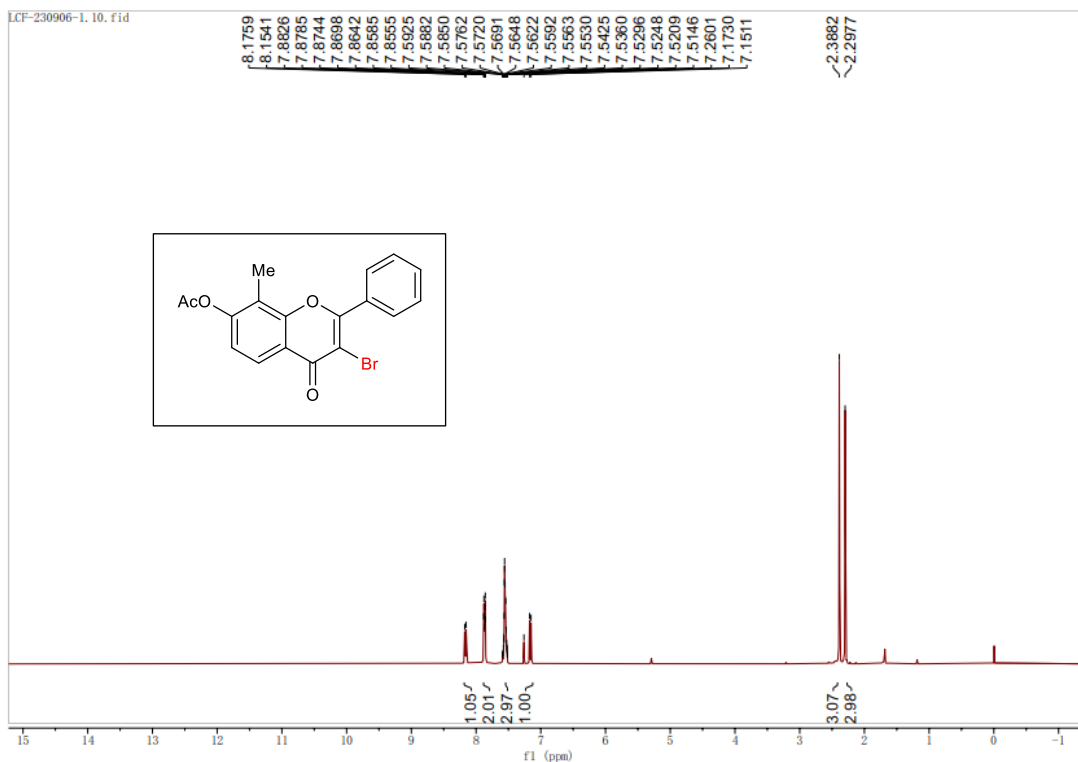

$^1\text{H}$  NMR Spectra of compound **2bi** in  $\text{CDCl}_3$  (400 MHz)

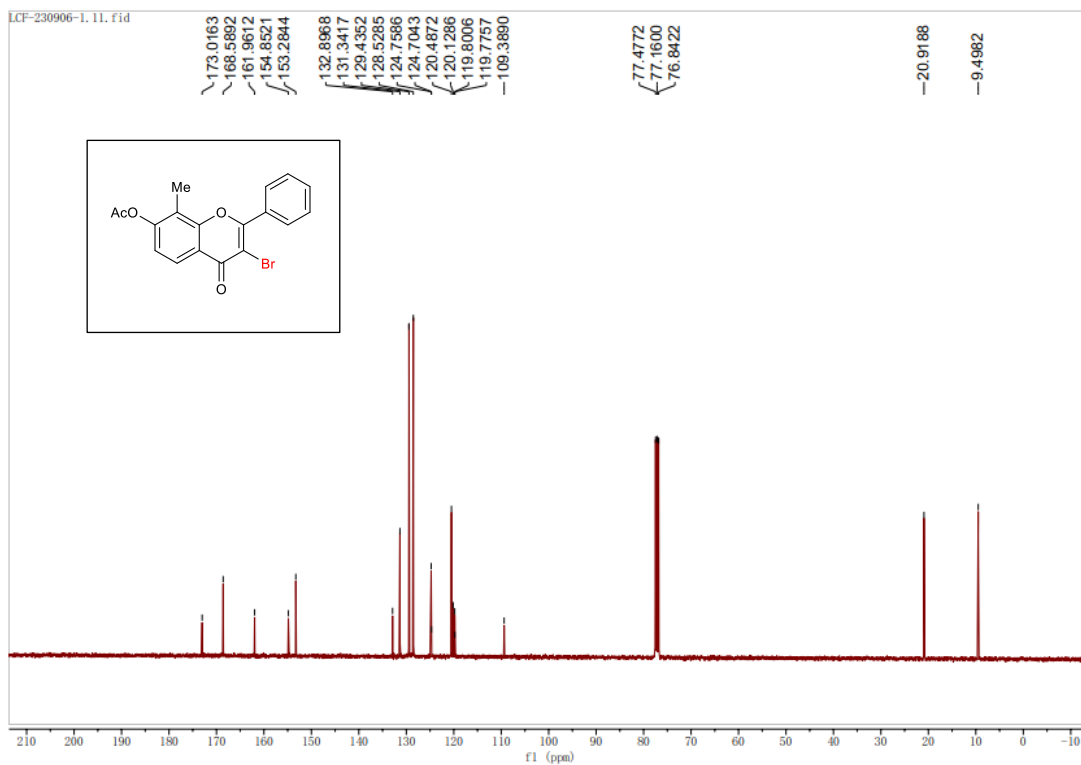

$^{13}\text{C}$  NMR Spectra of compound **2bi** in  $\text{CDCl}_3$  (101 MHz)

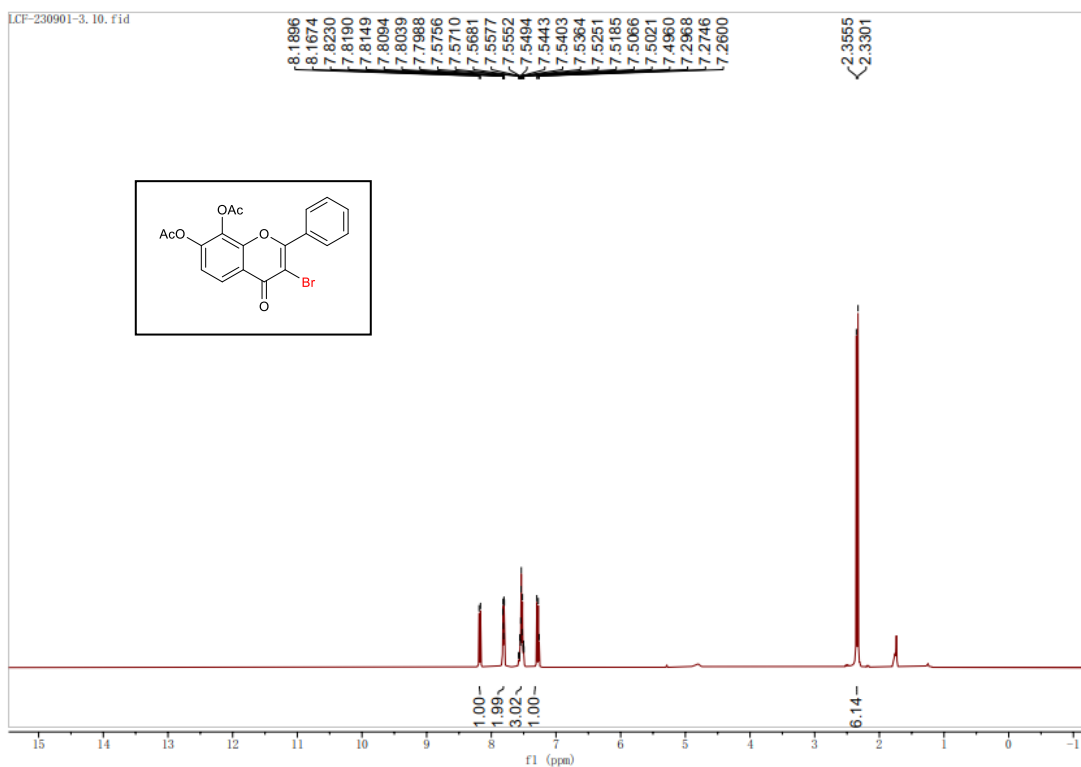

$^1\text{H}$  NMR Spectra of compound **2bj** in  $\text{CDCl}_3$  (400 MHz)

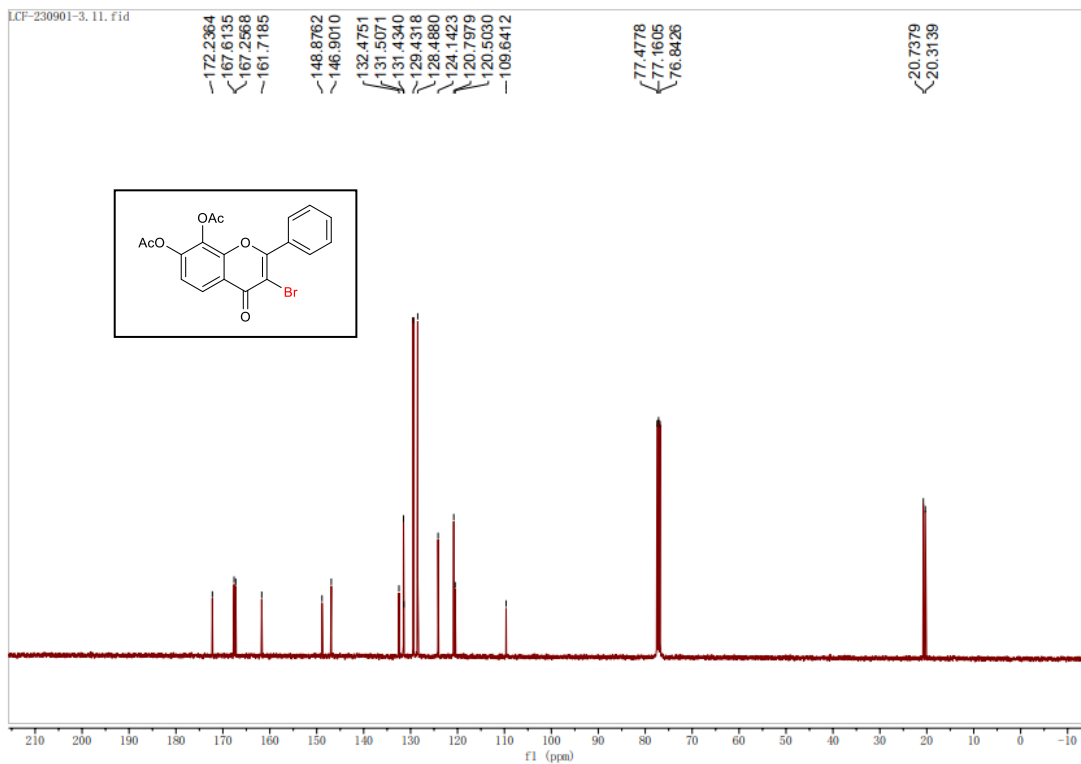

$^{13}\text{C}$  NMR Spectra of compound **2bj** in  $\text{CDCl}_3$  (101 MHz)



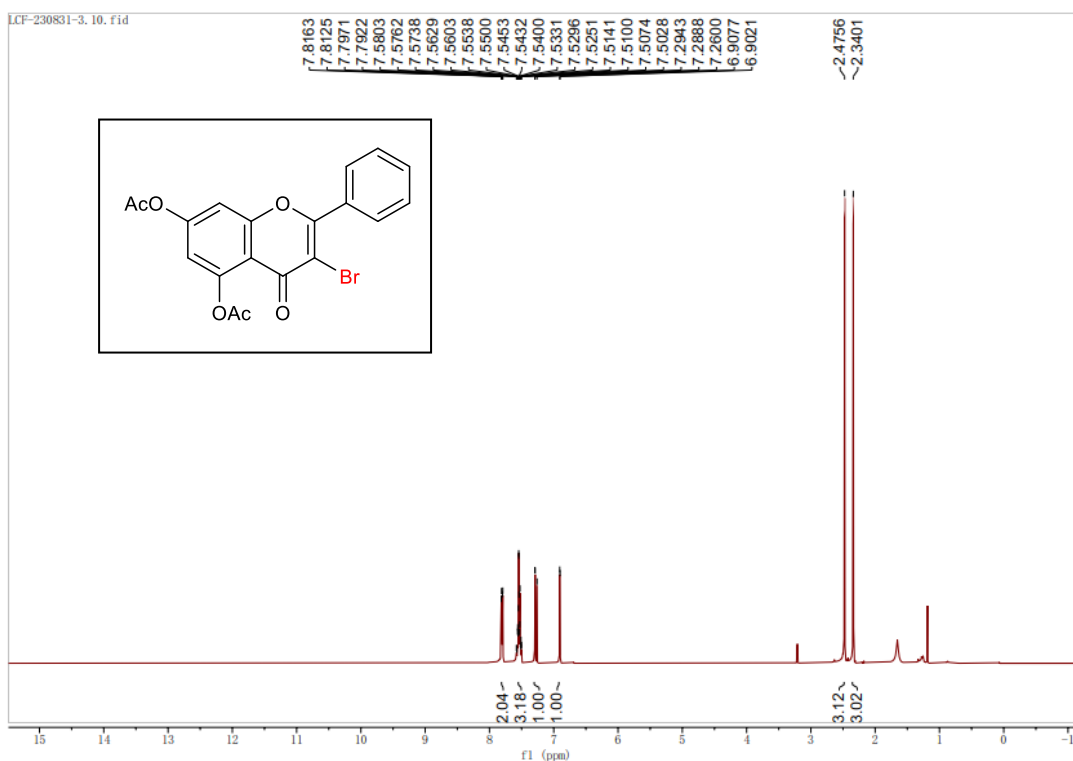

$^1\text{H}$  NMR Spectra of compound **2bk** in  $\text{CDCl}_3$  (400 MHz)

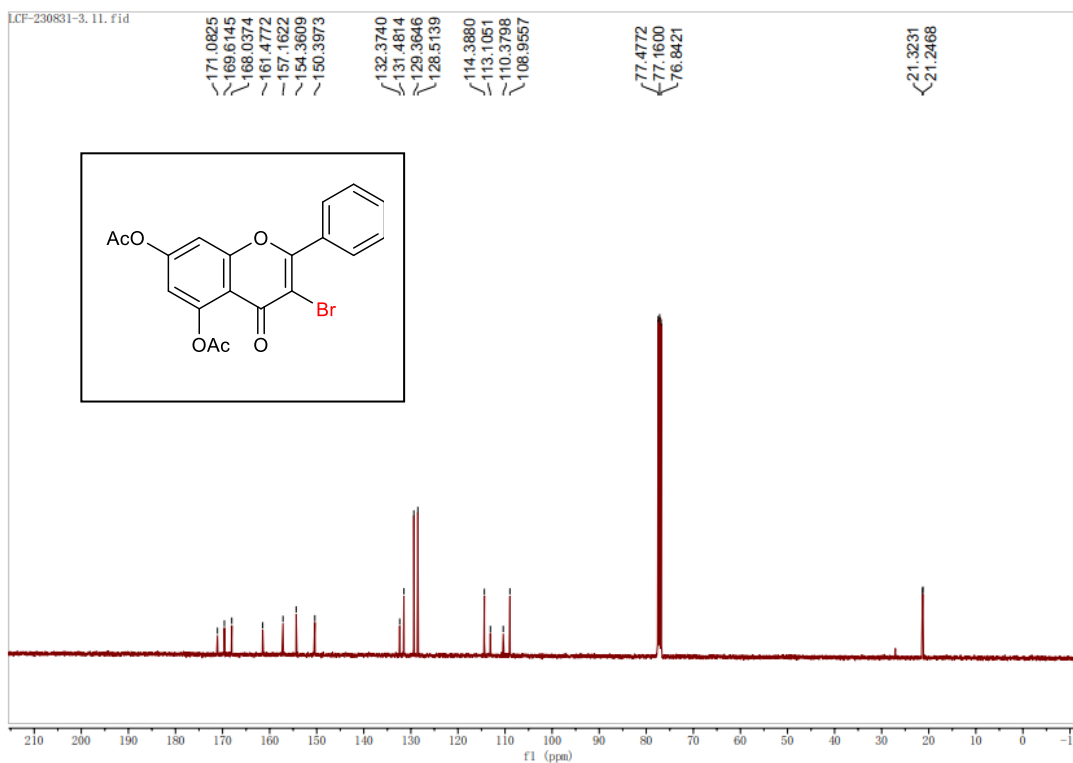

$^{13}\text{C}$  NMR Spectra of compound **2bk** in  $\text{CDCl}_3$  (101 MHz)

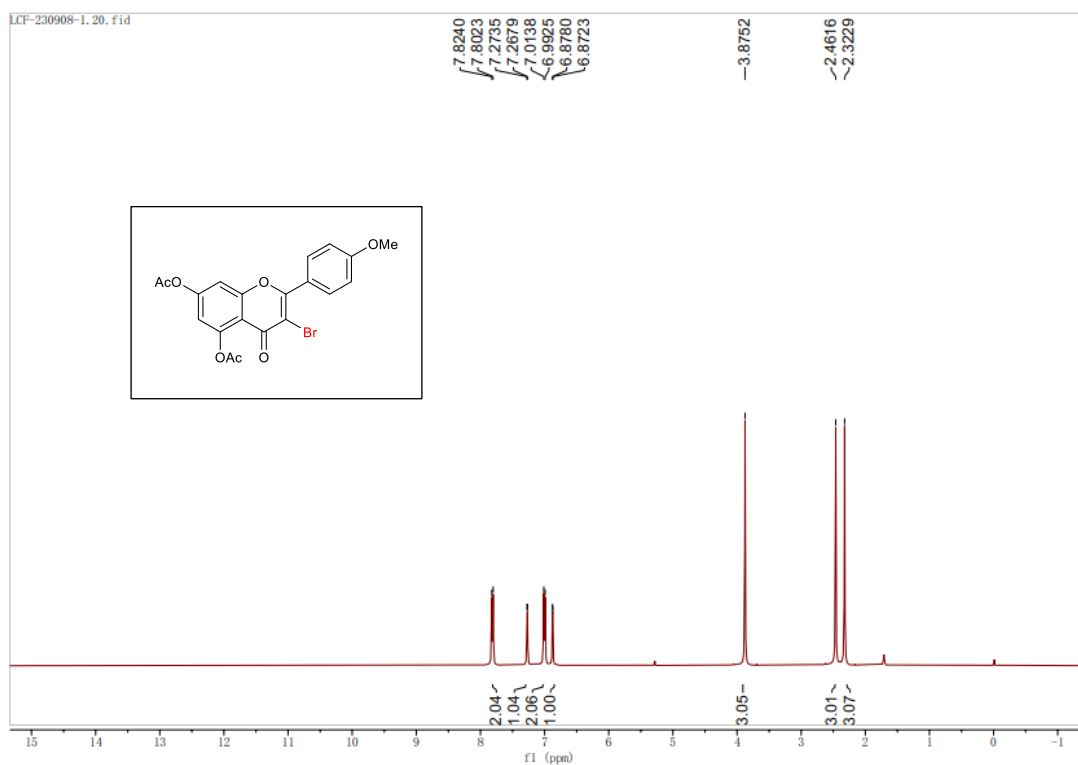

<sup>1</sup>H NMR Spectra of compound **2b1** in CDCl<sub>3</sub> (400 MHz)

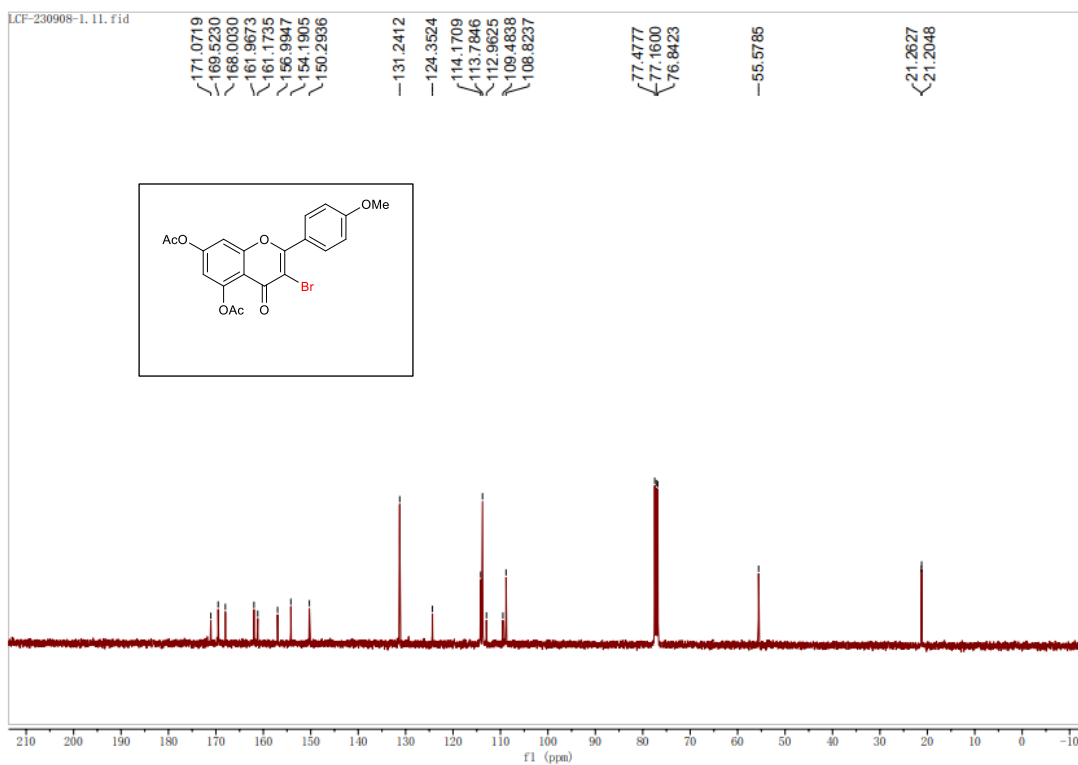

<sup>13</sup>C NMR Spectra of compound **2b1** in CDCl<sub>3</sub> (101 MHz)

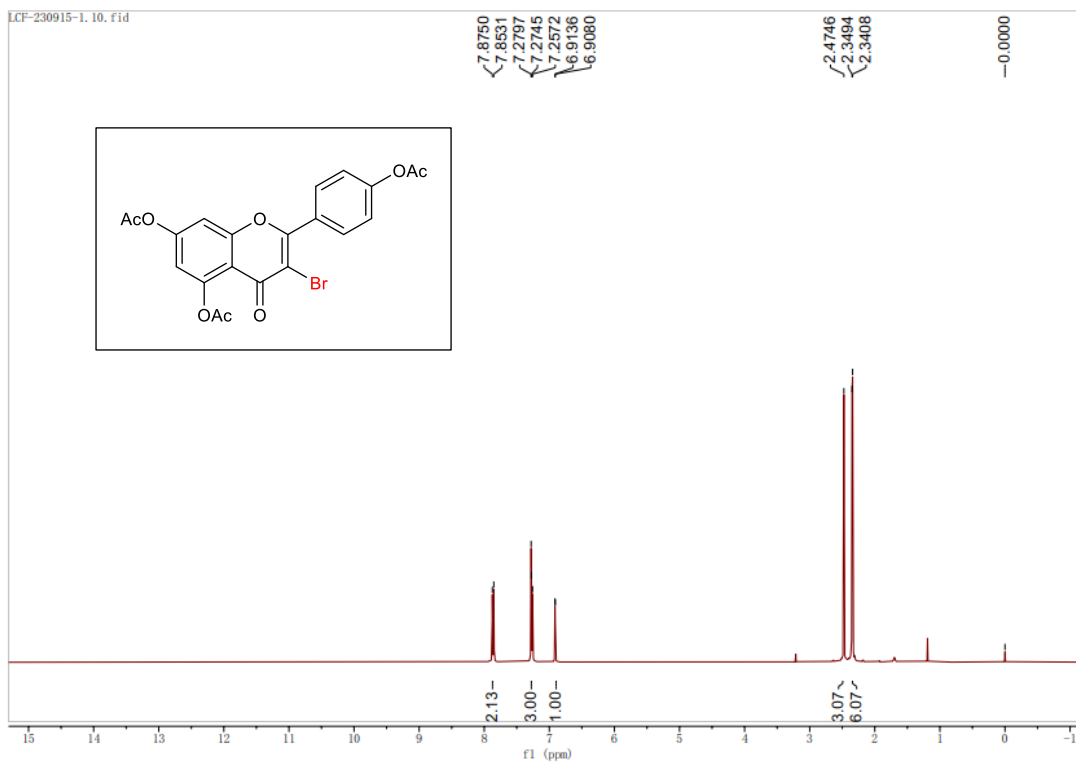

$^1\text{H}$  NMR Spectra of compound **2bm** in  $\text{CDCl}_3$  (400 MHz)

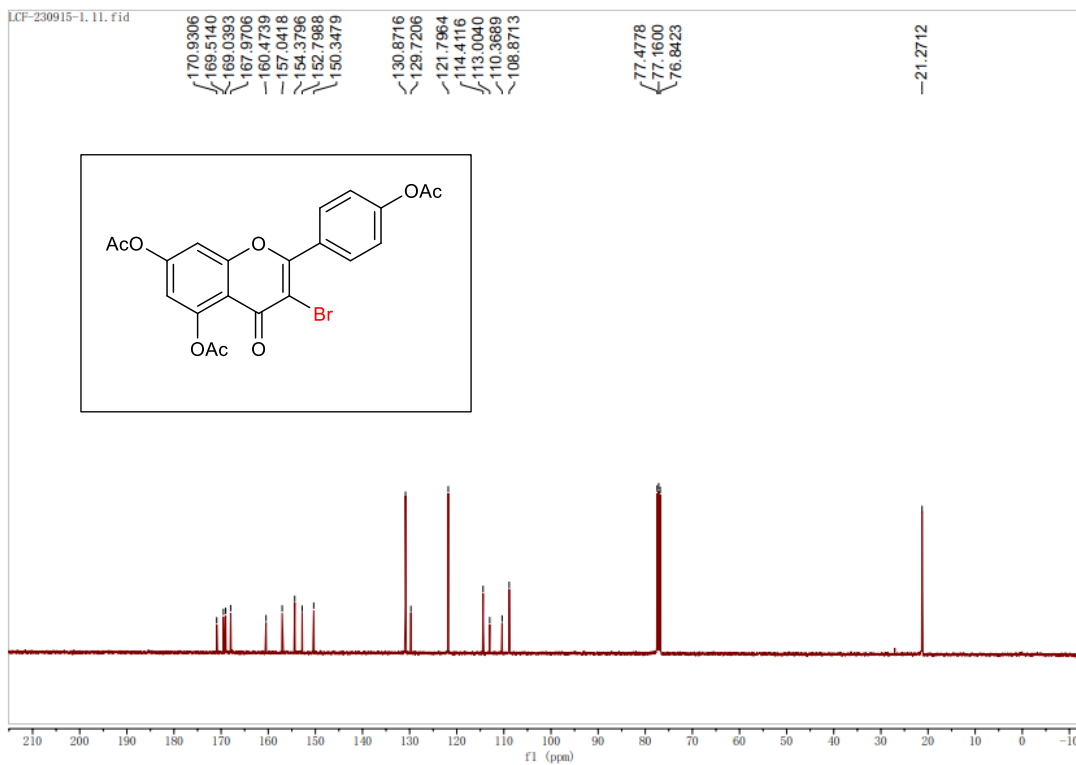

$^{13}\text{C}$  NMR Spectra of compound **2bm** in  $\text{CDCl}_3$  (101 MHz)

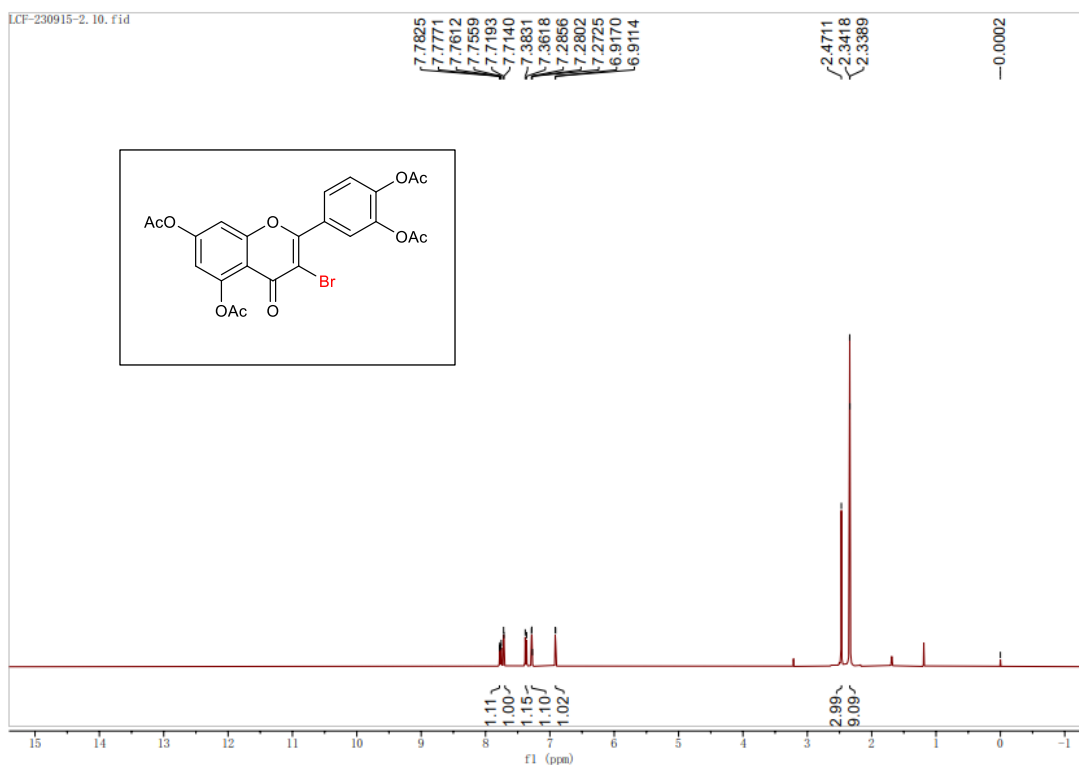

<sup>1</sup>H NMR Spectra of compound **2bn** in CDCl<sub>3</sub> (400 MHz)

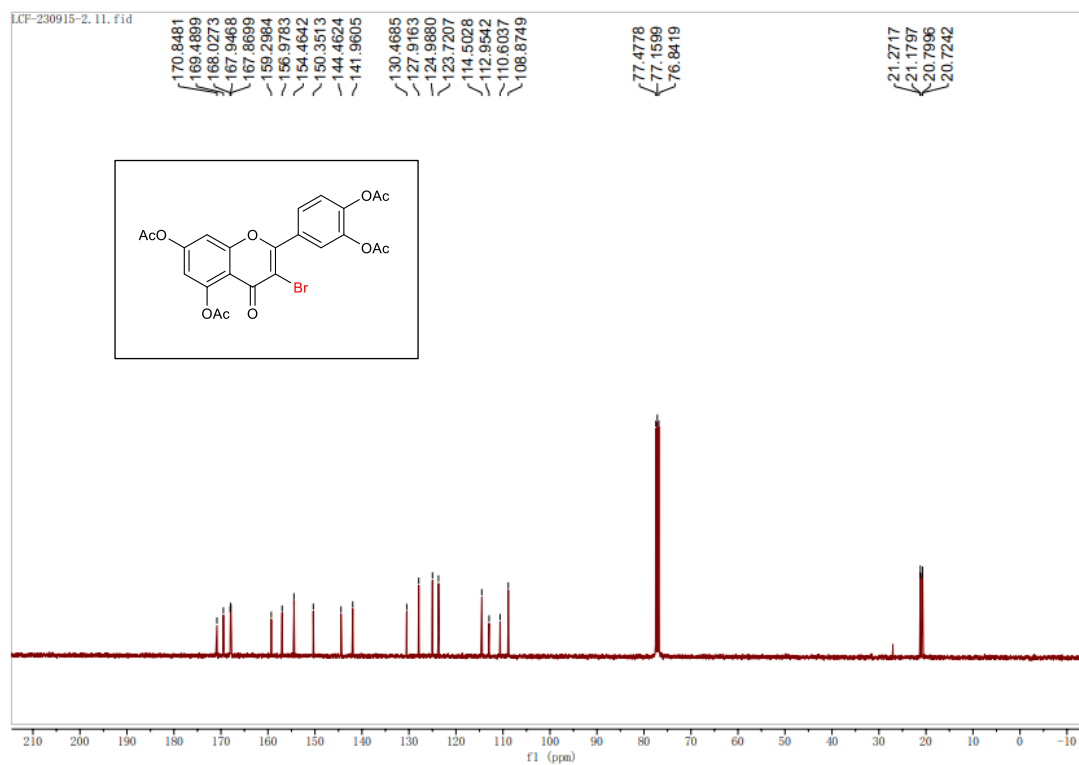

<sup>13</sup>C NMR Spectra of compound **2bn** in CDCl<sub>3</sub> (101 MHz)

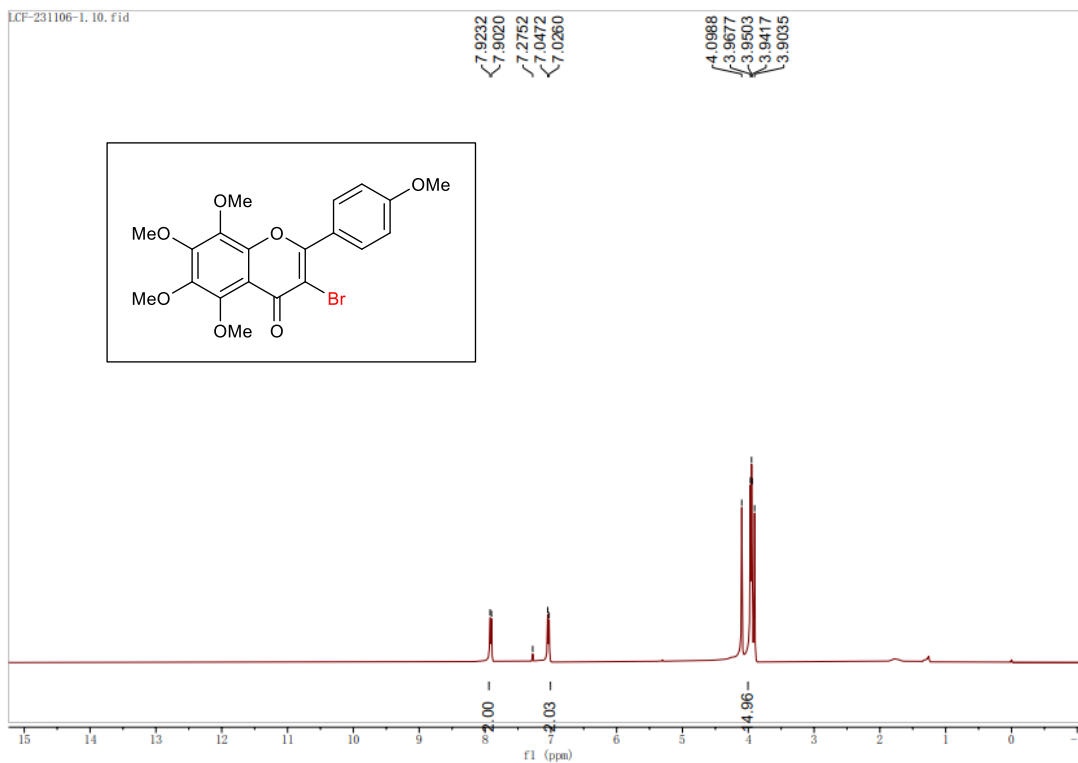

<sup>1</sup>H NMR Spectra of compound **2bo** in CDCl<sub>3</sub> (400 MHz)

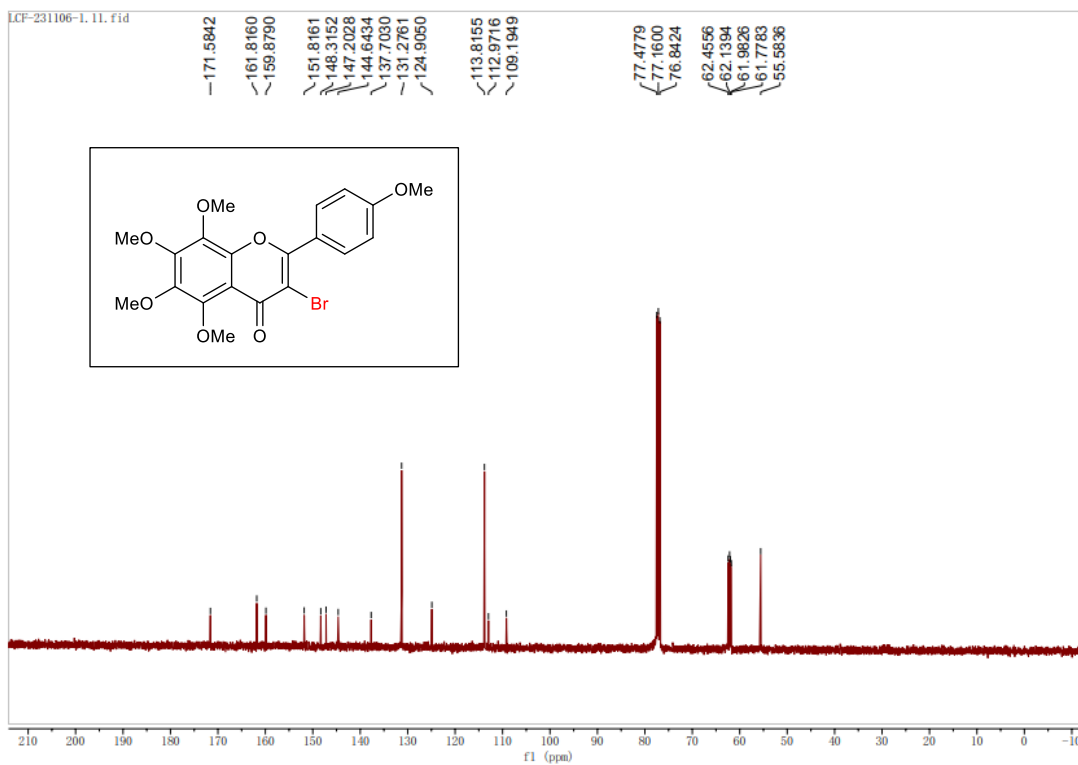

<sup>13</sup>C NMR Spectra of compound **2bo** in CDCl<sub>3</sub> (101 MHz)

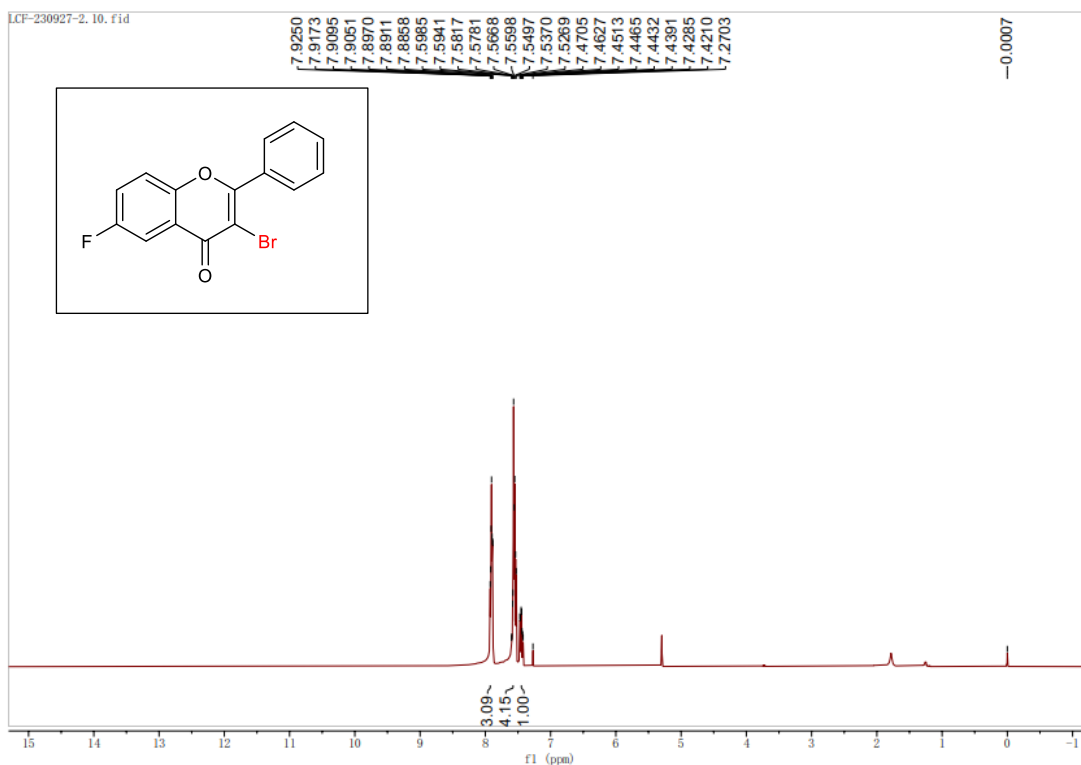

<sup>1</sup>H NMR Spectra of compound **2bp** in CDCl<sub>3</sub> (400 MHz)

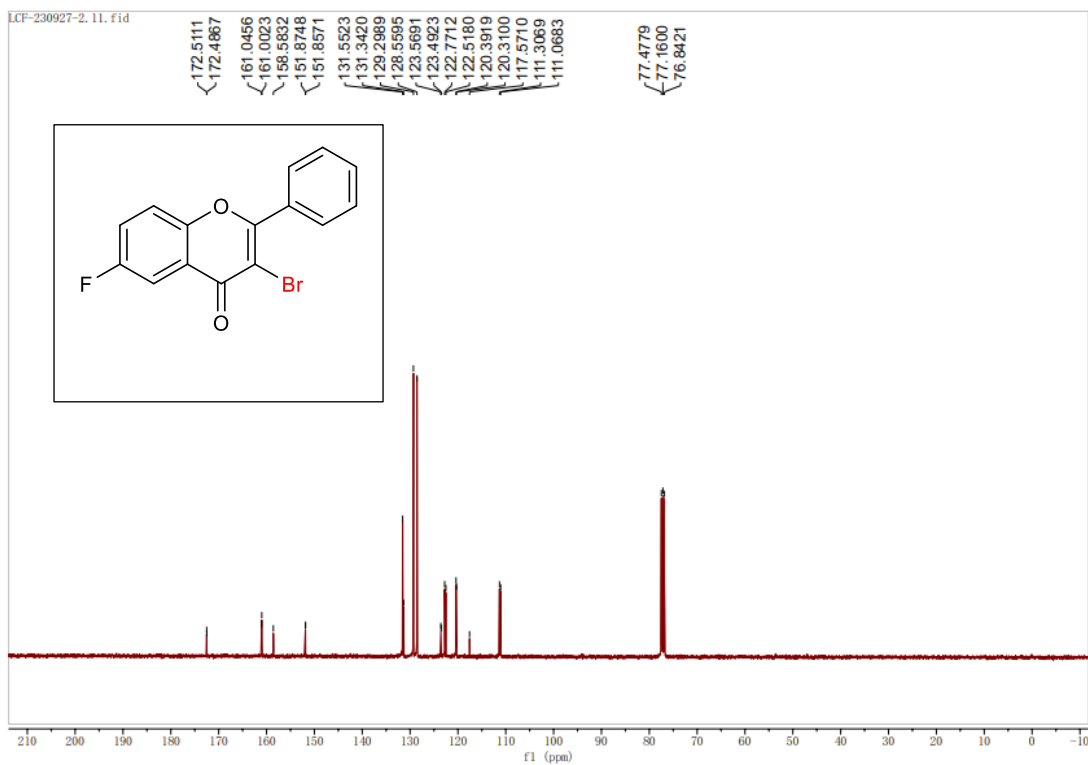

<sup>13</sup>C NMR Spectra of compound **2bp** in CDCl<sub>3</sub> (101 MHz)

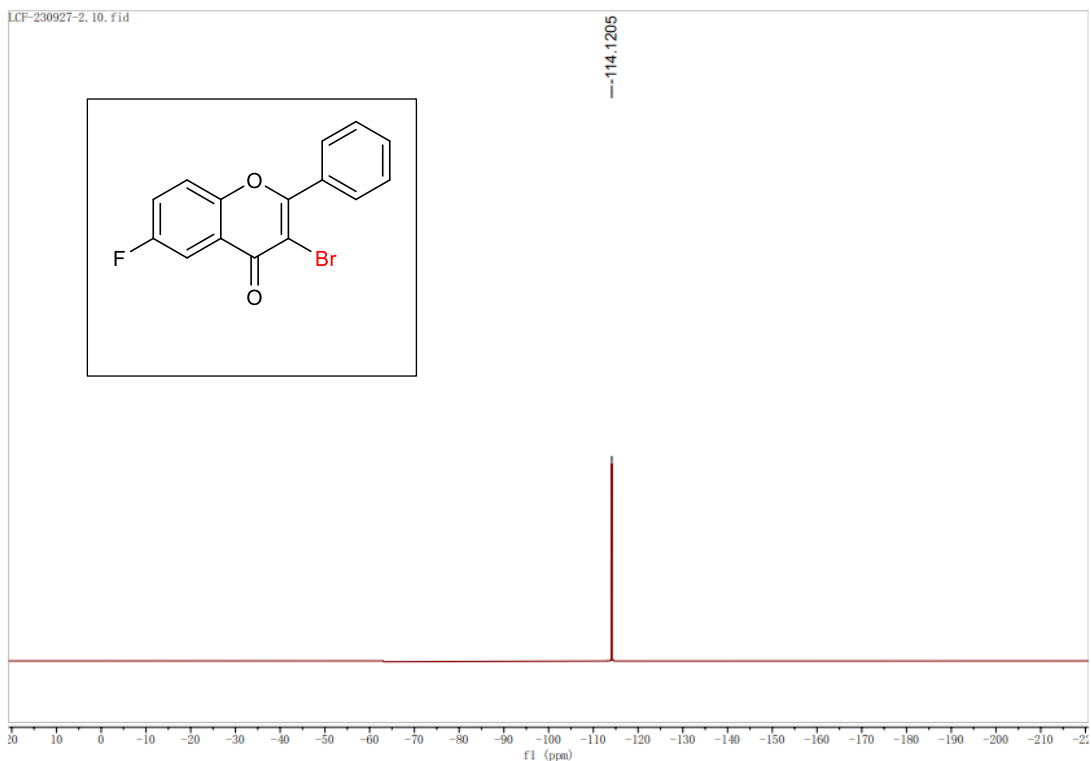

$^{19}\text{F}$  NMR Spectra of compound **2bp** in  $\text{CDCl}_3$  (377 MHz)

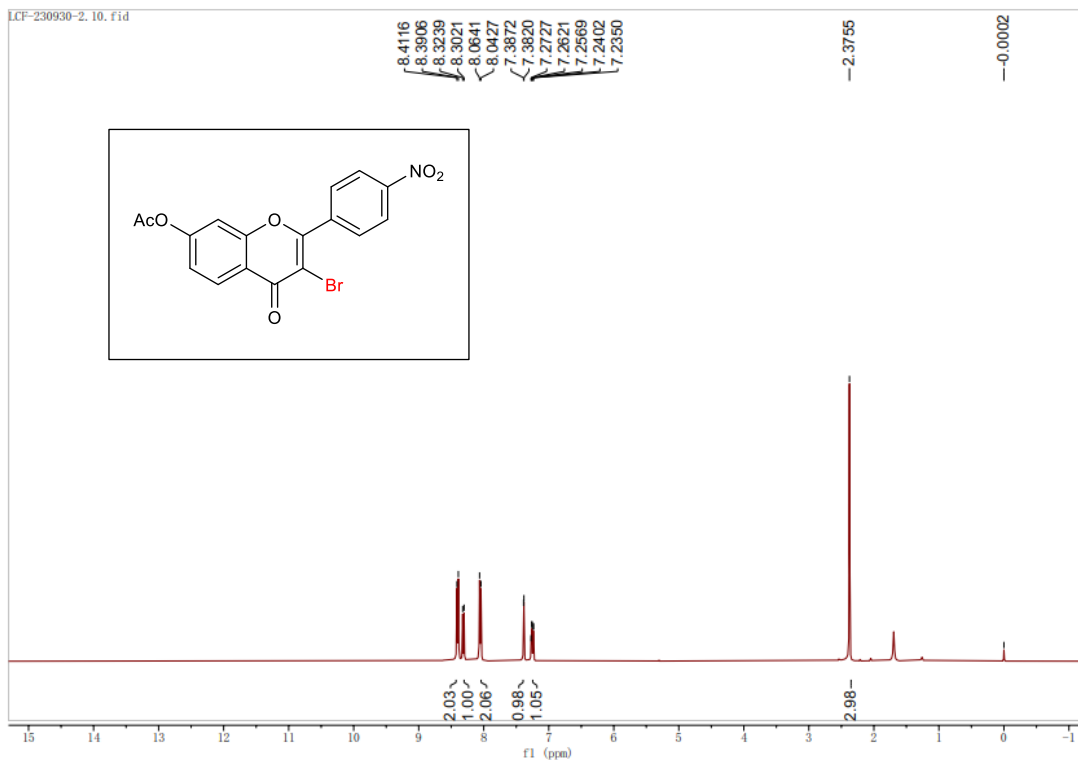

$^1\text{H}$  NMR Spectra of compound **2bq** in  $\text{CDCl}_3$  (400 MHz)

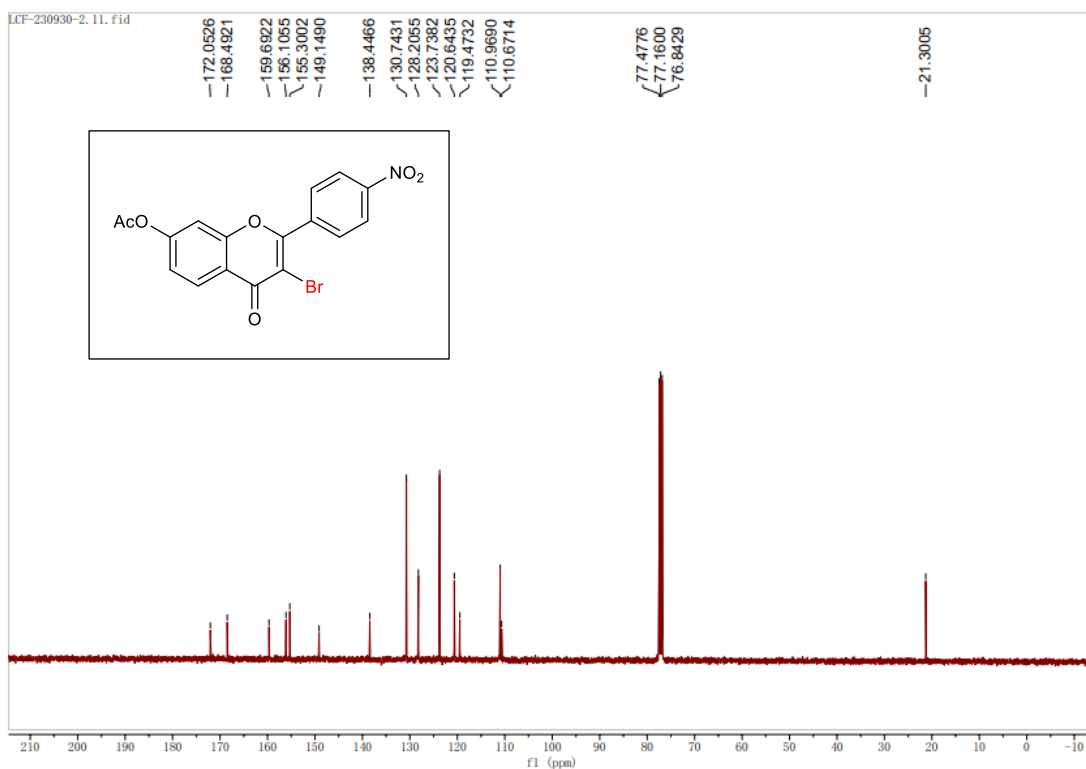

$^{13}\text{C}$  NMR Spectra of compound **2bq** in  $\text{CDCl}_3$  (101 MHz)

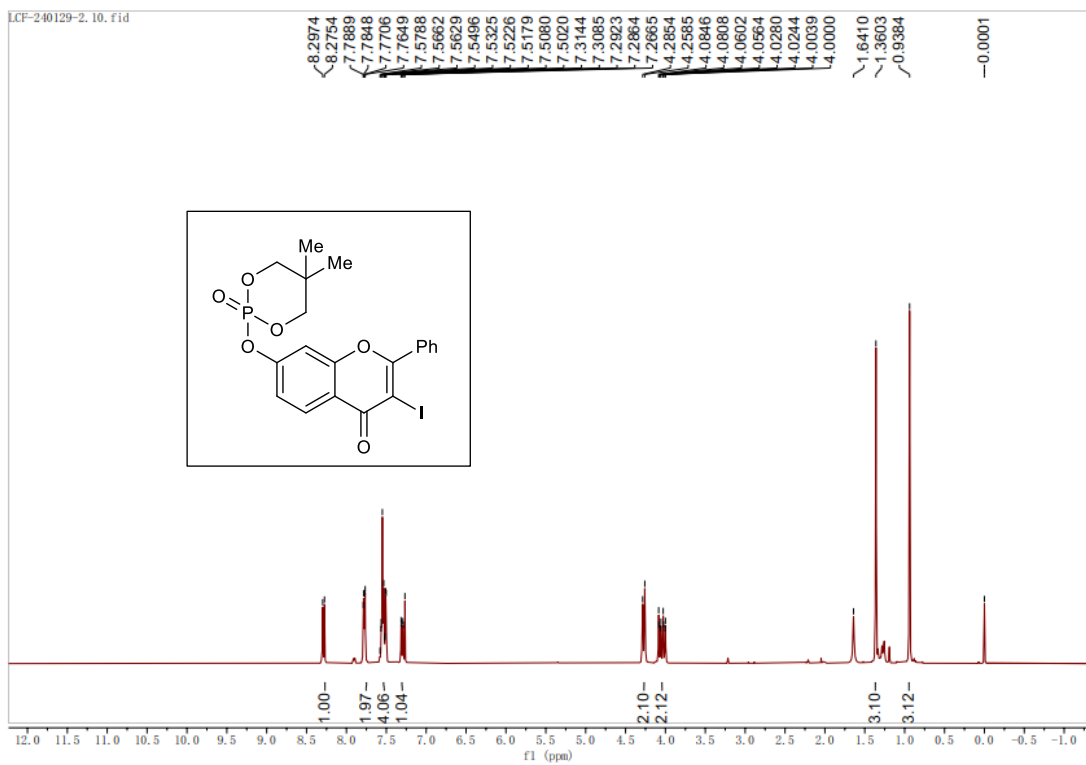

$^1\text{H}$  NMR Spectra of compound **2ca** in  $\text{CDCl}_3$  (400 MHz)



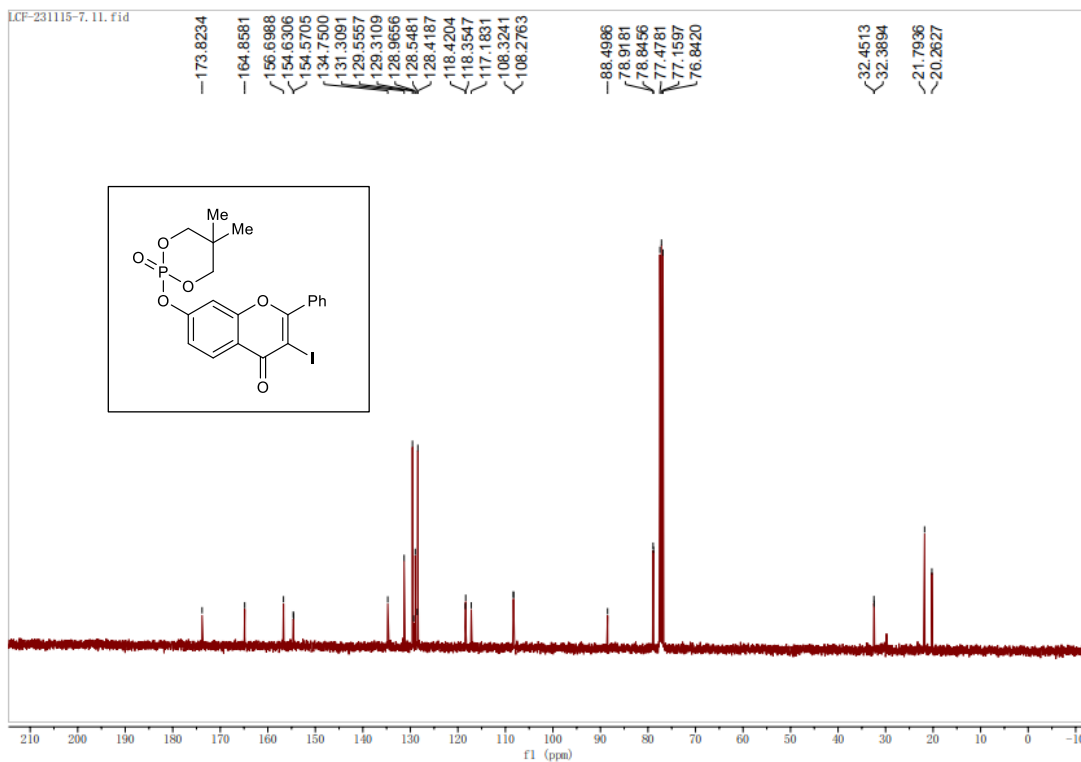

$^{13}\text{C}$  NMR Spectra of compound **2ca** in  $\text{CDCl}_3$  (101 MHz)

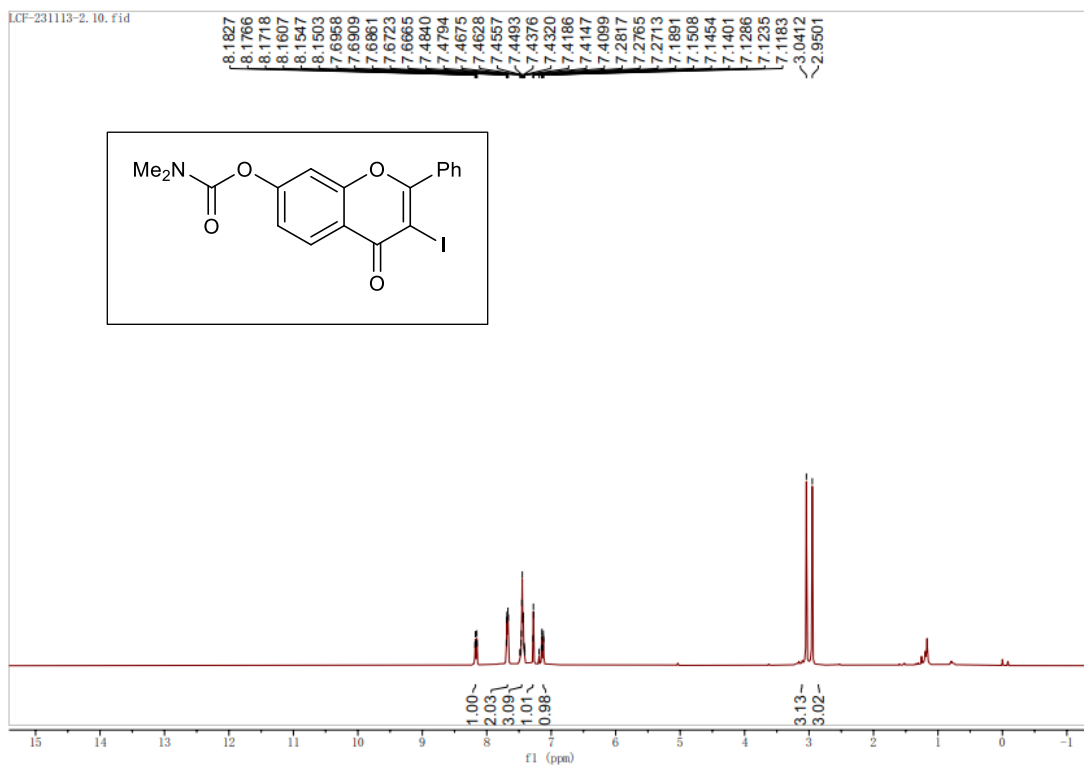

$^1\text{H}$  NMR Spectra of compound **2cb** in  $\text{CDCl}_3$  (400 MHz)

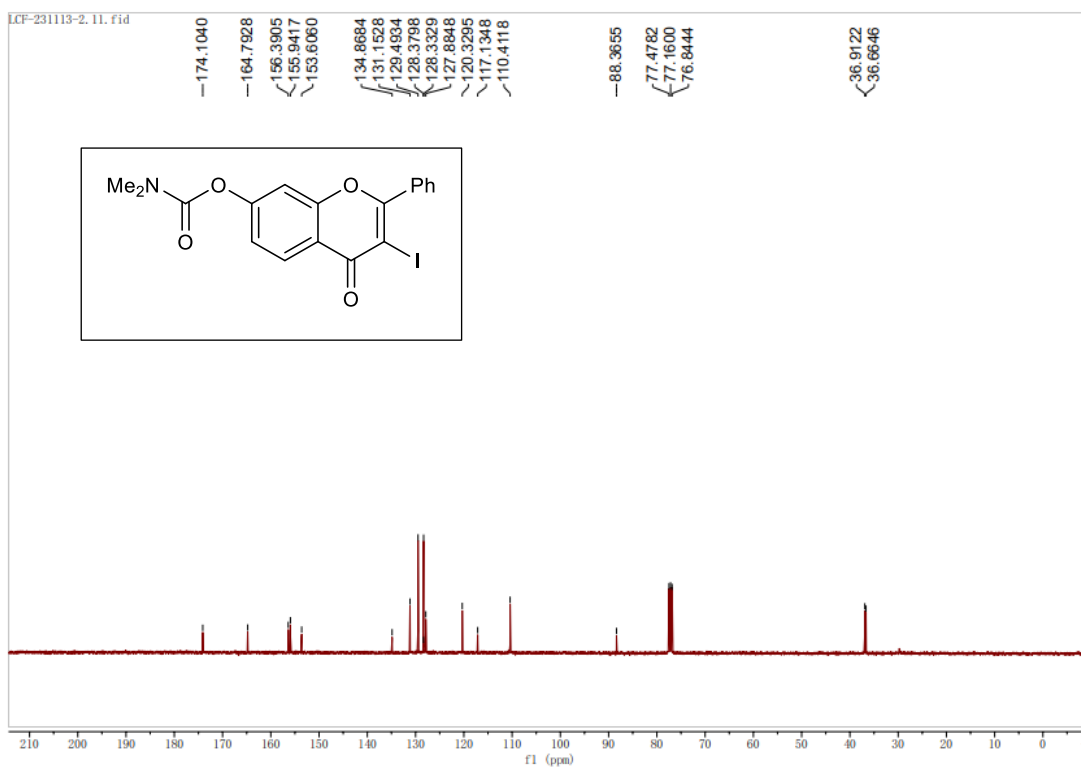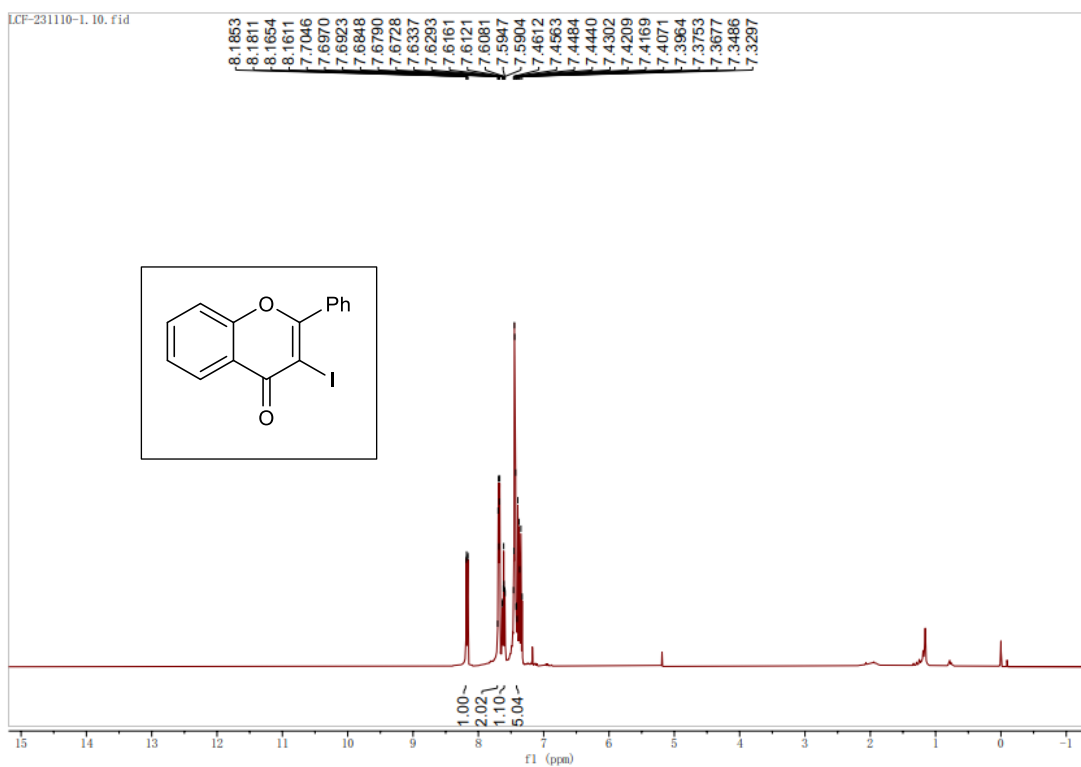

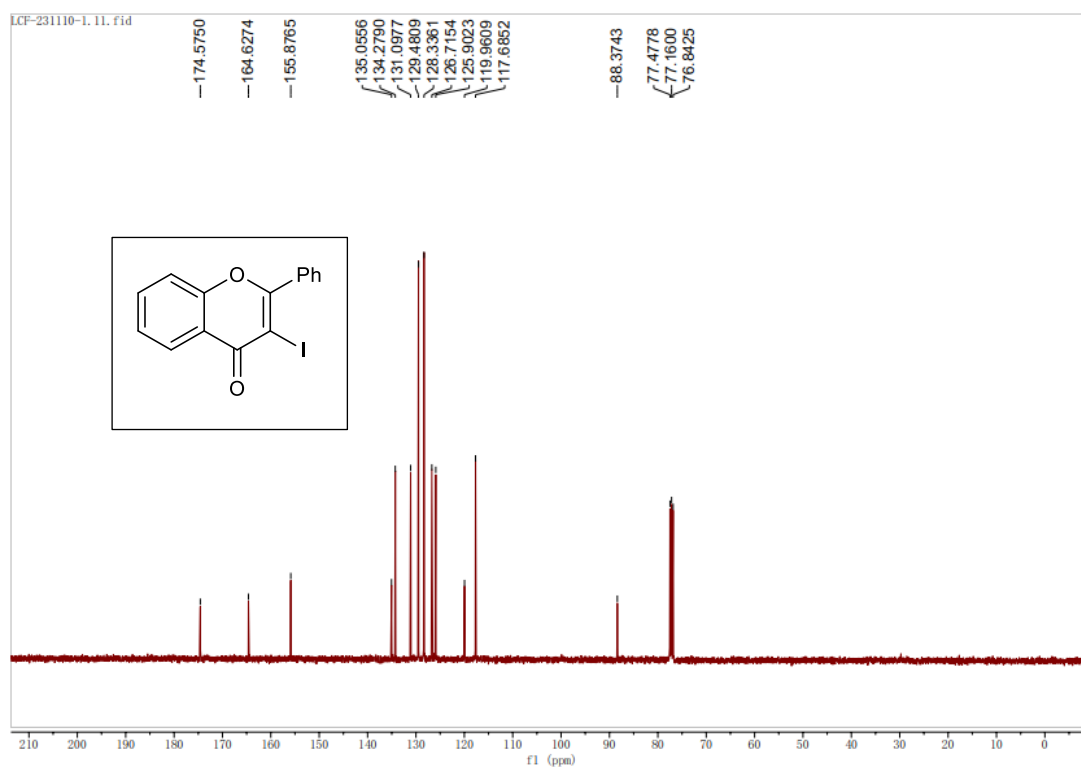

$^{13}\text{C}$  NMR Spectra of compound **2cc** in  $\text{CDCl}_3$  (101 MHz)

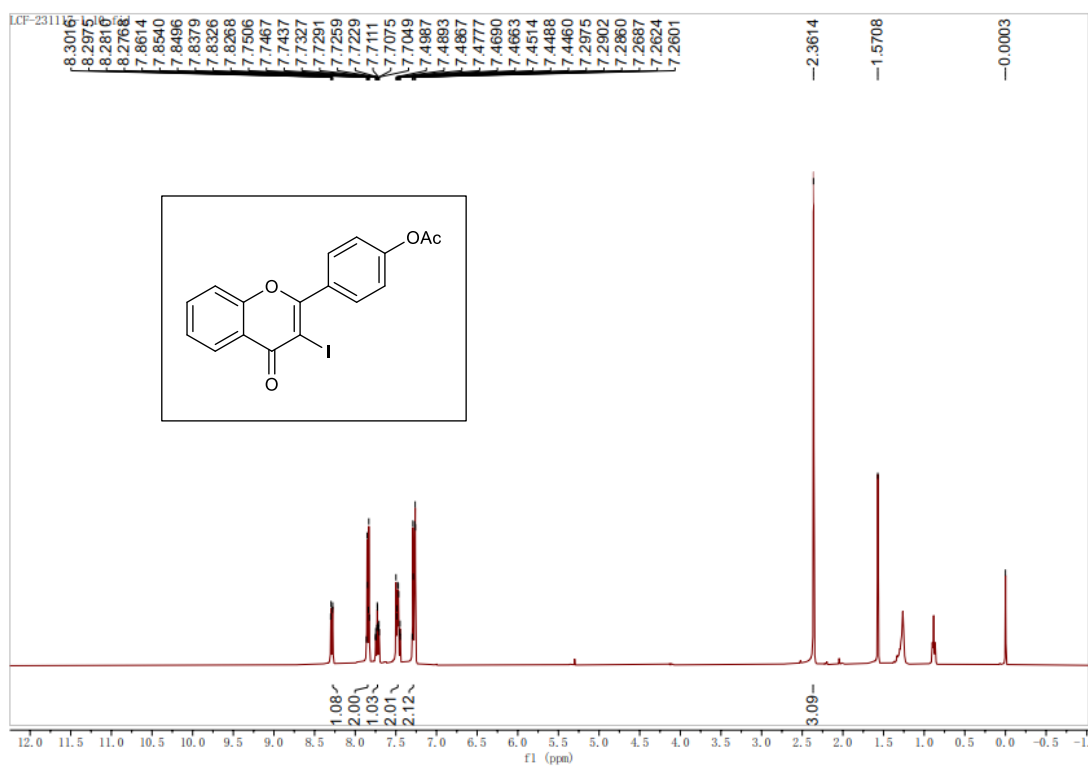

$^1\text{H}$  NMR Spectra of compound **2cd** in  $\text{CDCl}_3$  (400 MHz)

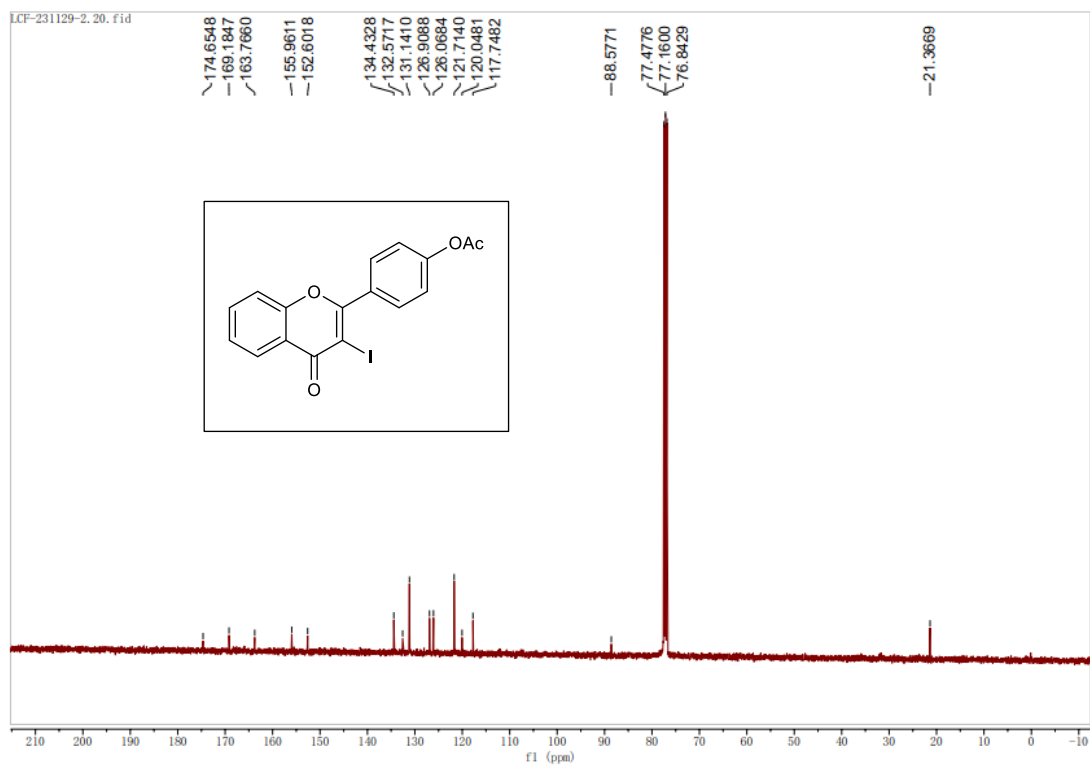

$^{13}\text{C}$  NMR Spectra of compound **2cd** in  $\text{CDCl}_3$  (101 MHz)

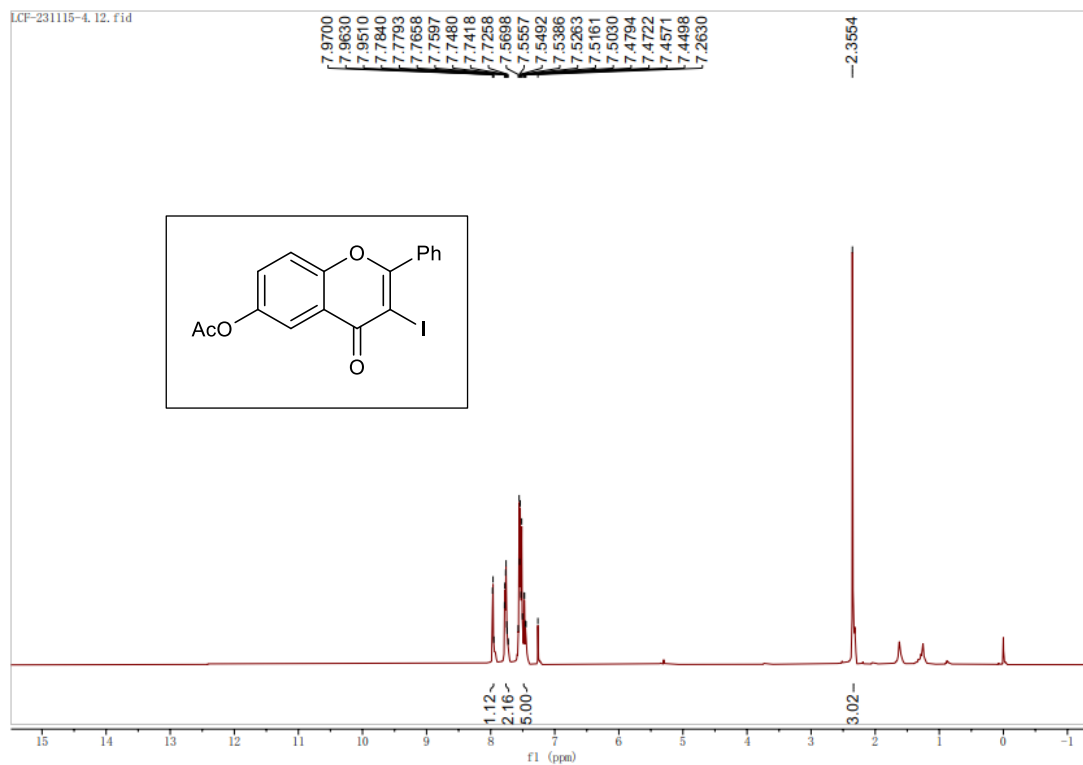

$^1\text{H}$  NMR Spectra of compound **2ce** in  $\text{CDCl}_3$  (400 MHz)

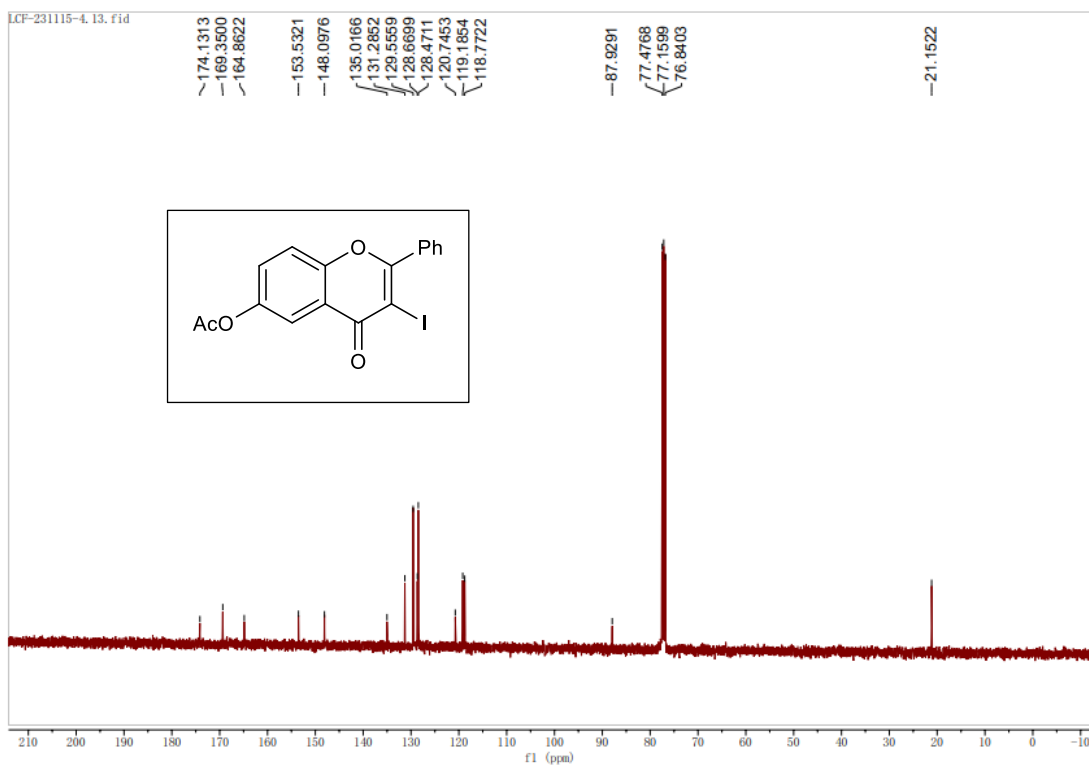

$^{13}\text{C}$  NMR Spectra of compound **2ce** in  $\text{CDCl}_3$  (101 MHz)

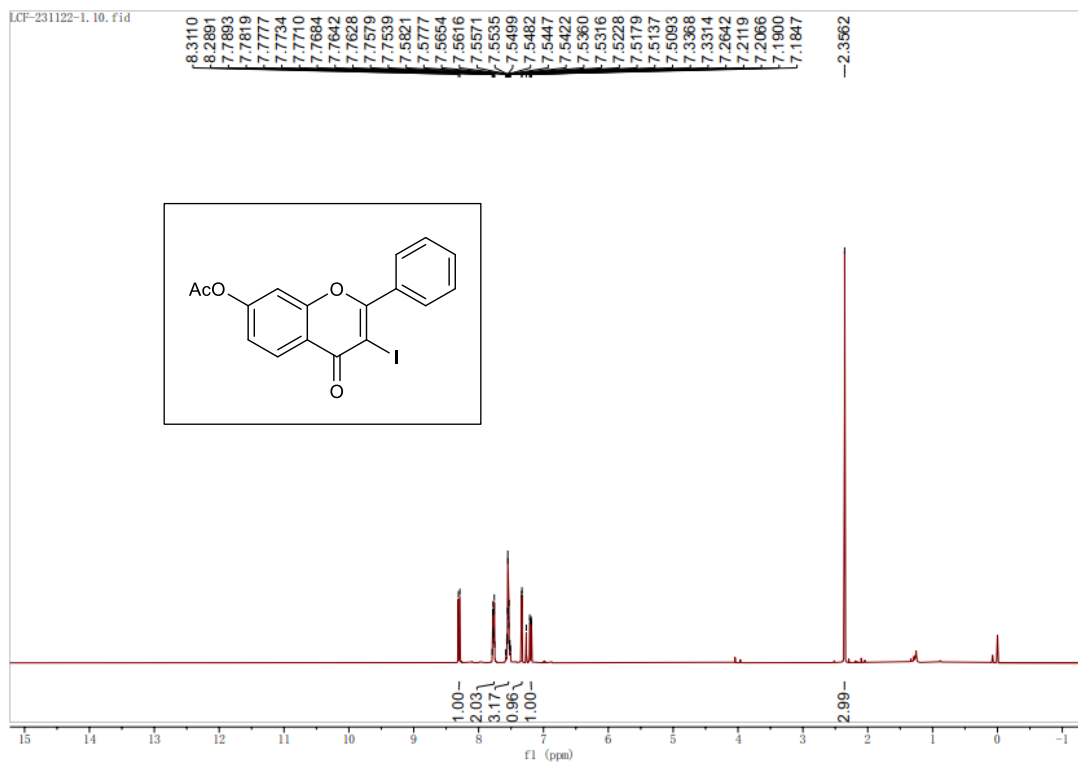

$^1\text{H}$  NMR Spectra of compound **2cf** in  $\text{CDCl}_3$  (400 MHz)

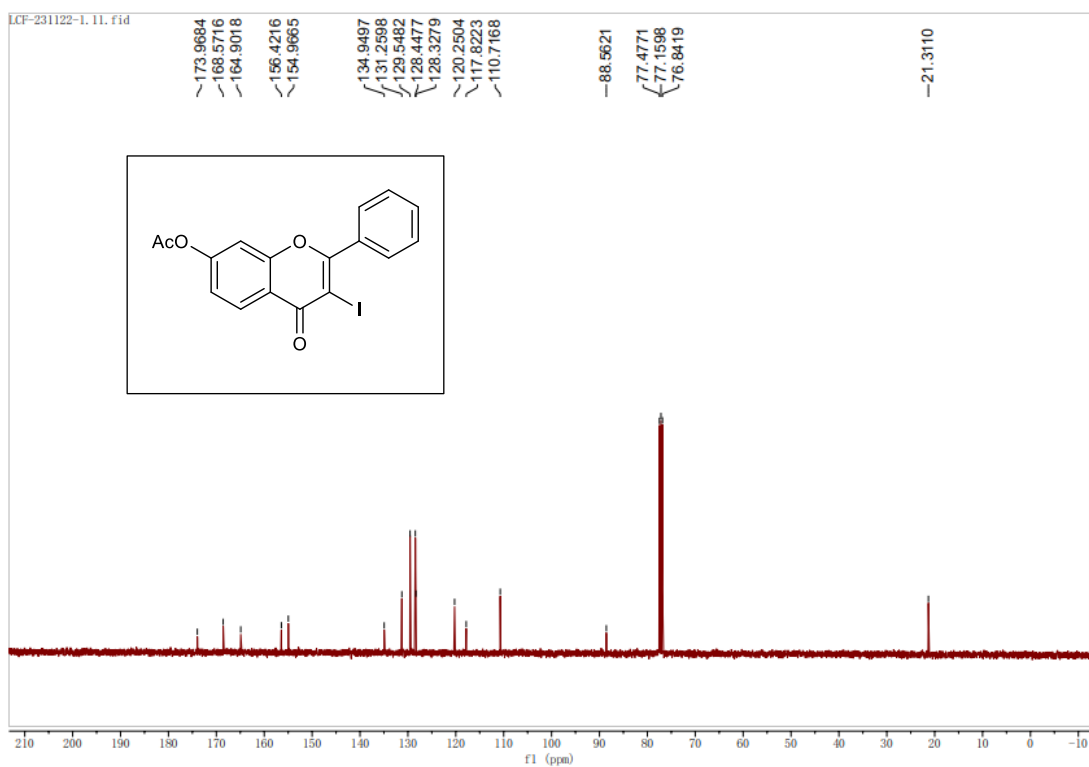

$^{13}\text{C}$  NMR Spectra of compound **2cf** in  $\text{CDCl}_3$  (101 MHz)

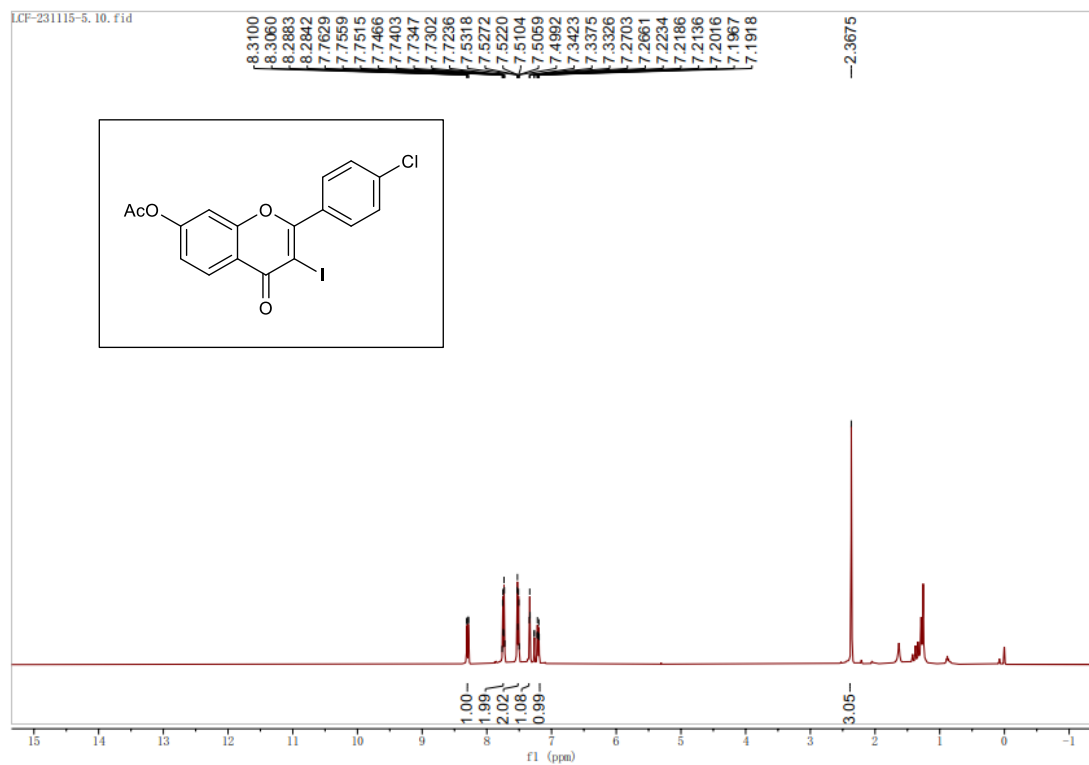

$^1\text{H}$  NMR Spectra of compound **2cg** in  $\text{CDCl}_3$  (400 MHz)

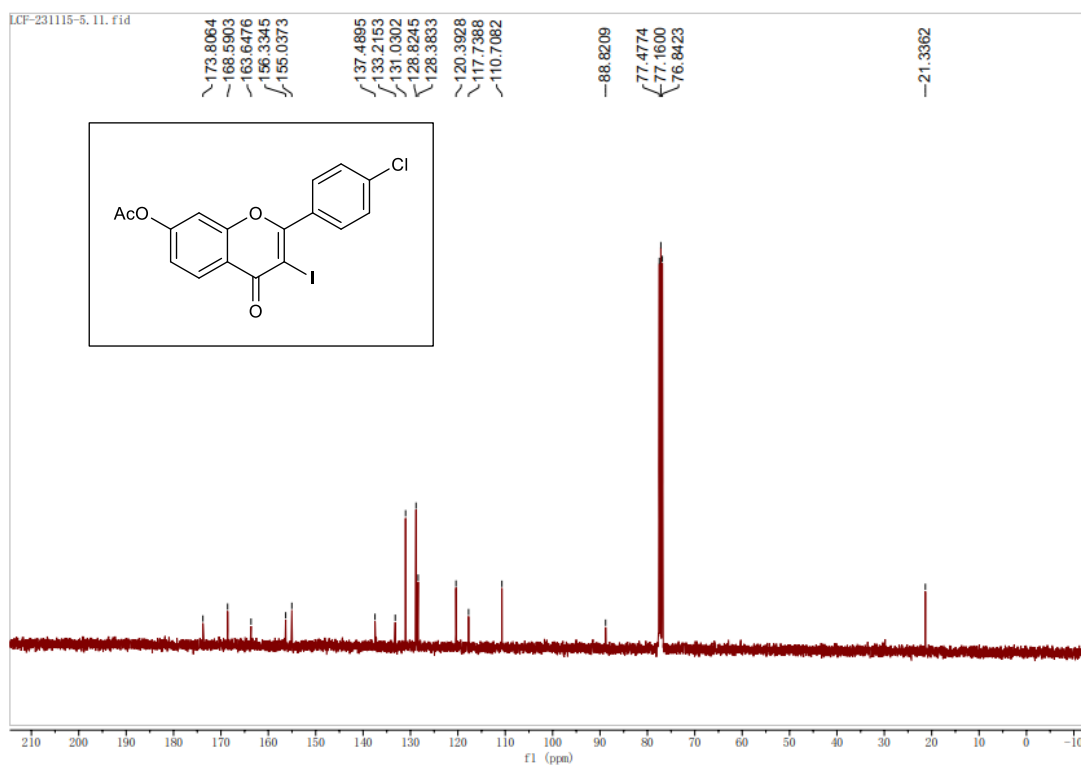

$^{13}\text{C}$  NMR Spectra of compound **2cg** in  $\text{CDCl}_3$  (101 MHz)

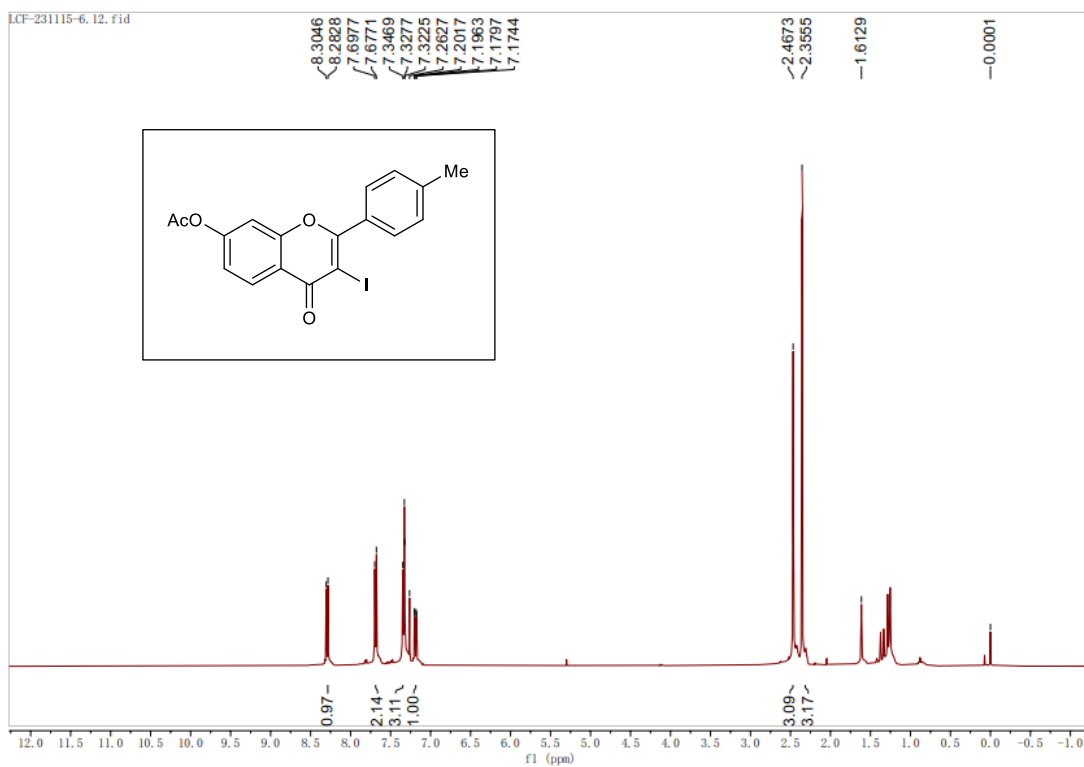

$^1\text{H}$  NMR Spectra of compound **2ch** in  $\text{CDCl}_3$  (400 MHz)

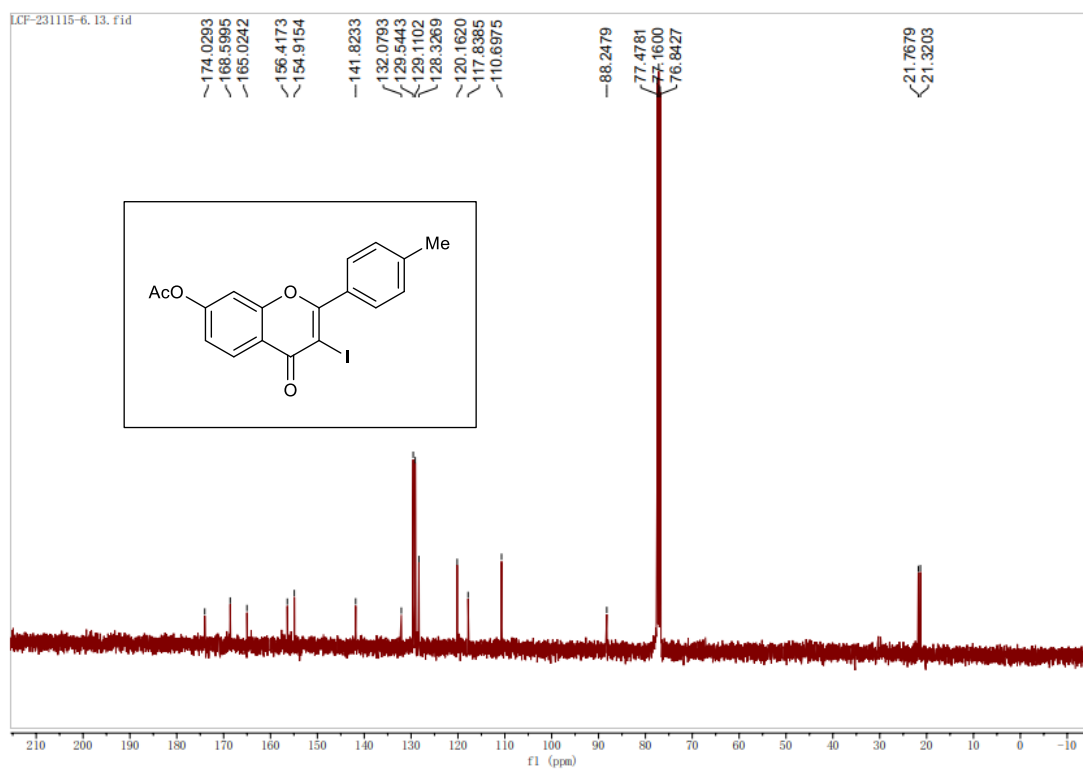

$^{13}\text{C}$  NMR Spectra of compound **2ch** in  $\text{CDCl}_3$  (101 MHz)

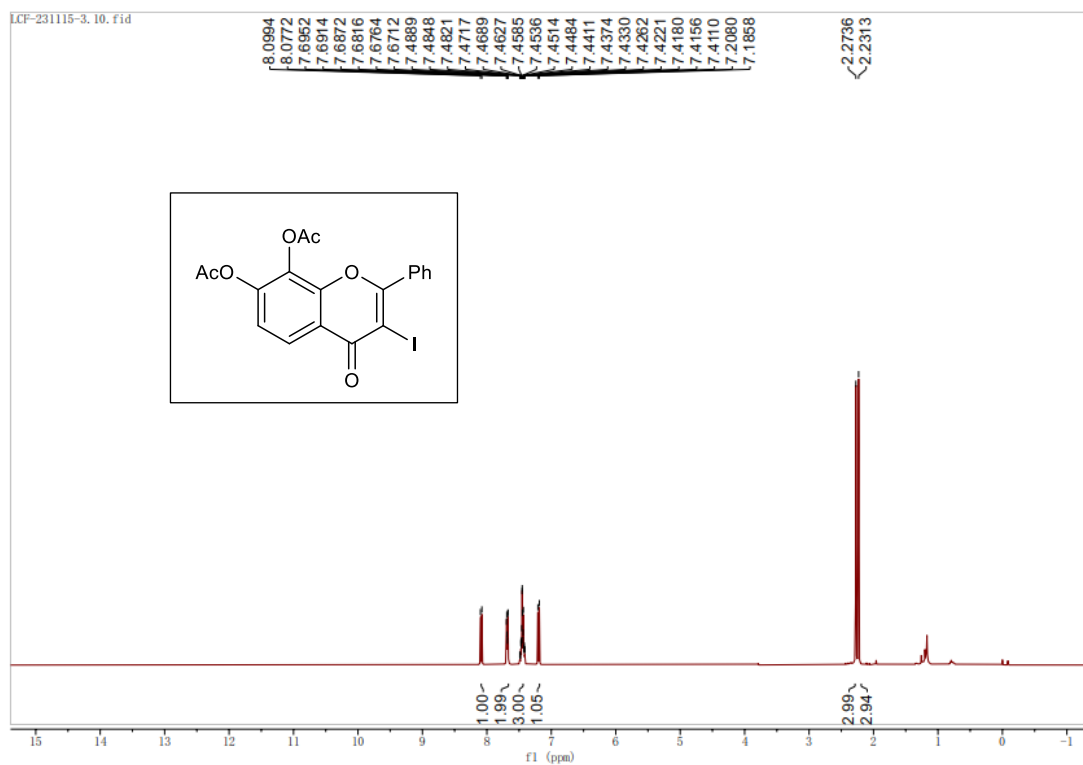

$^1\text{H}$  NMR Spectra of compound **2ci** in  $\text{CDCl}_3$  (400 MHz)



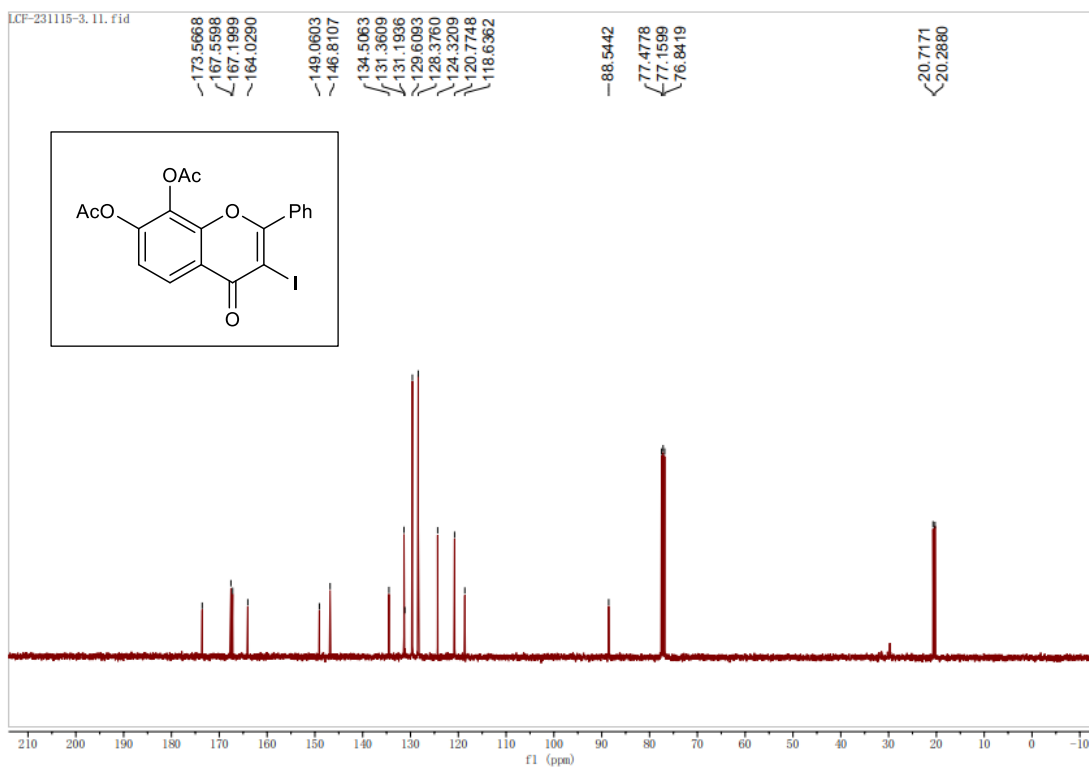

<sup>13</sup>C NMR Spectra of compound **2ci** in CDCl<sub>3</sub> (101 MHz)

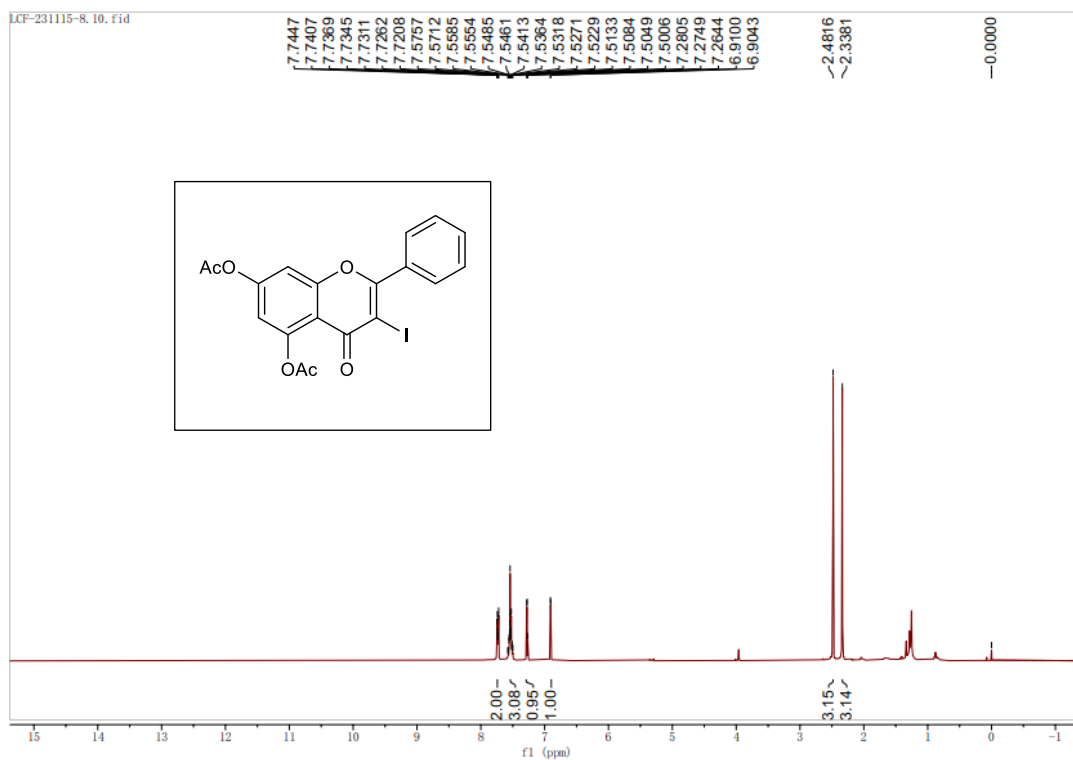

<sup>1</sup>H NMR Spectra of compound **2cj** in CDCl<sub>3</sub> (400 MHz)

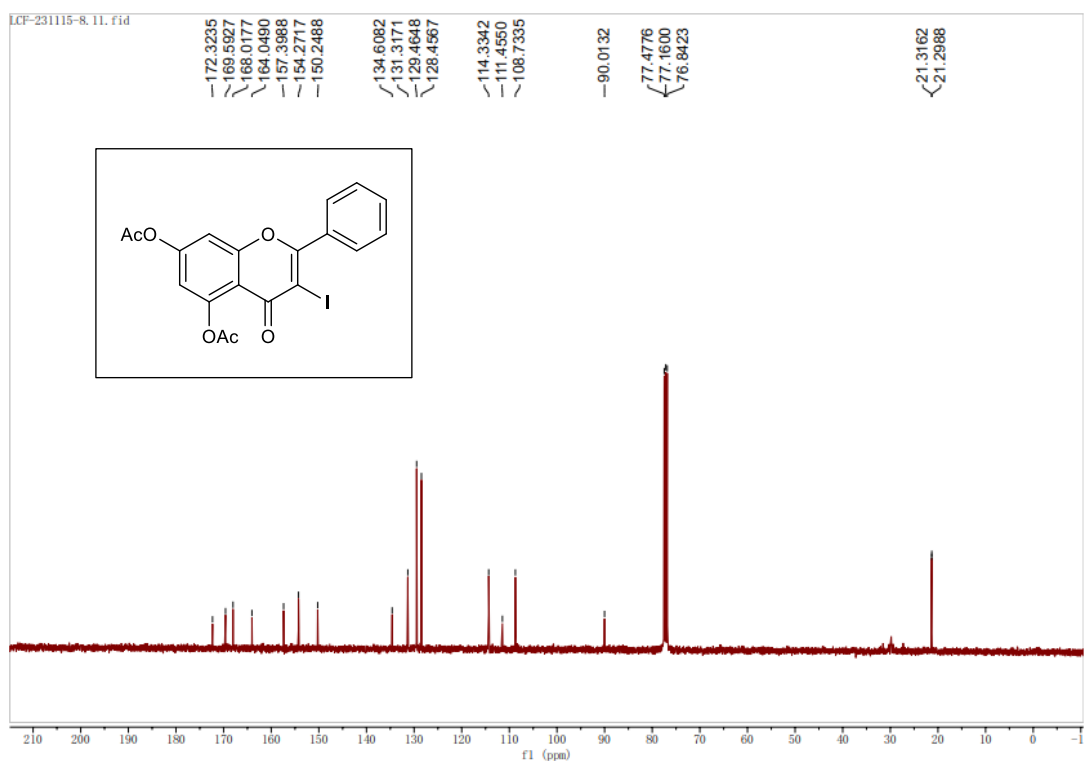

$^{13}\text{C}$  NMR Spectra of compound **2cj** in  $\text{CDCl}_3$  (101 MHz)

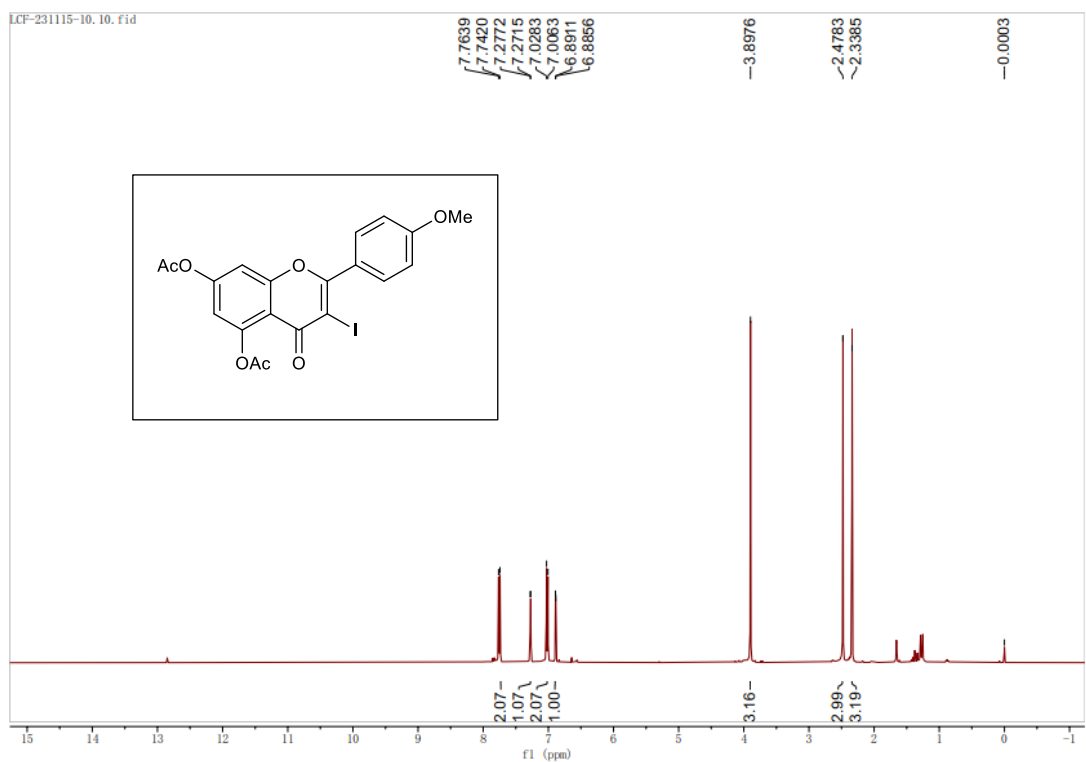

$^1\text{H}$  NMR Spectra of compound **2ck** in  $\text{CDCl}_3$  (400 MHz)

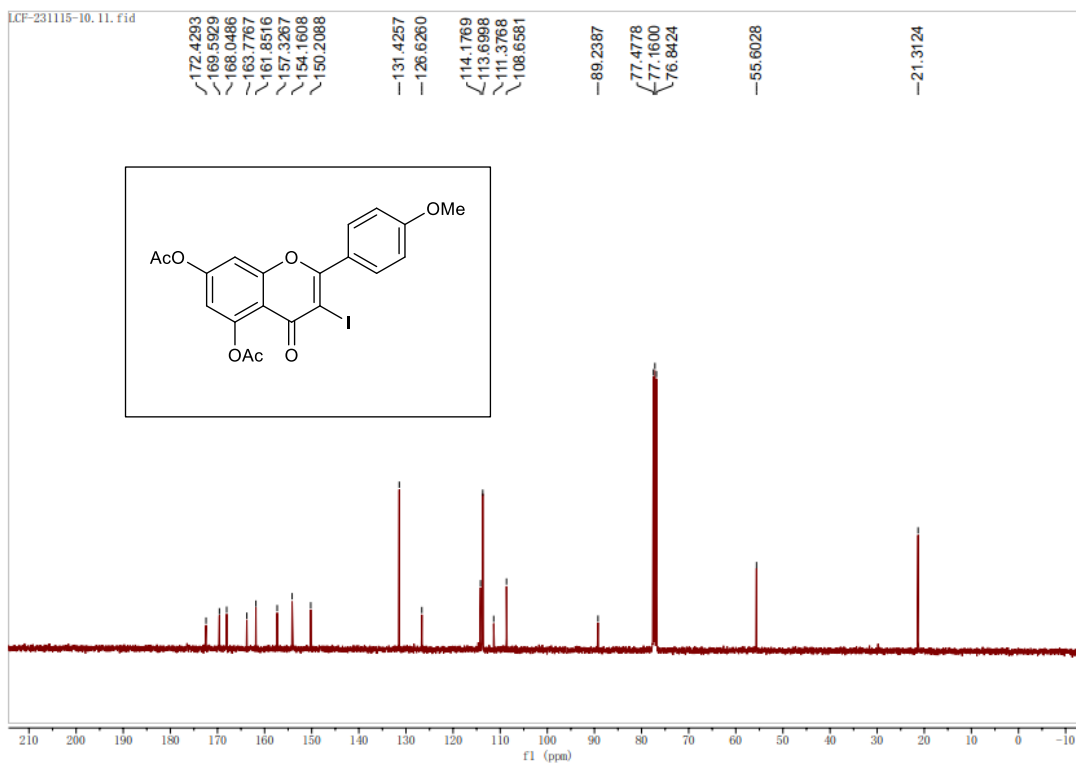

$^{13}\text{C}$  NMR Spectra of compound **2ck** in  $\text{CDCl}_3$  (101 MHz)

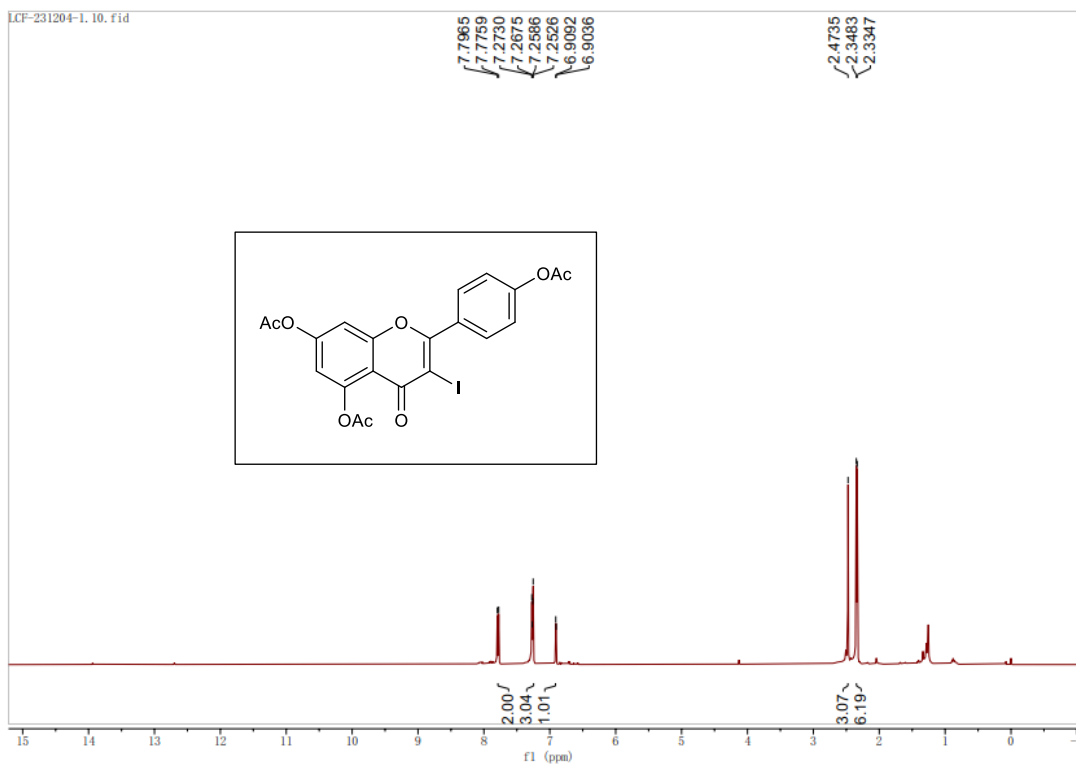

$^1\text{H}$  NMR Spectra of compound **2cl** in  $\text{CDCl}_3$  (400 MHz)

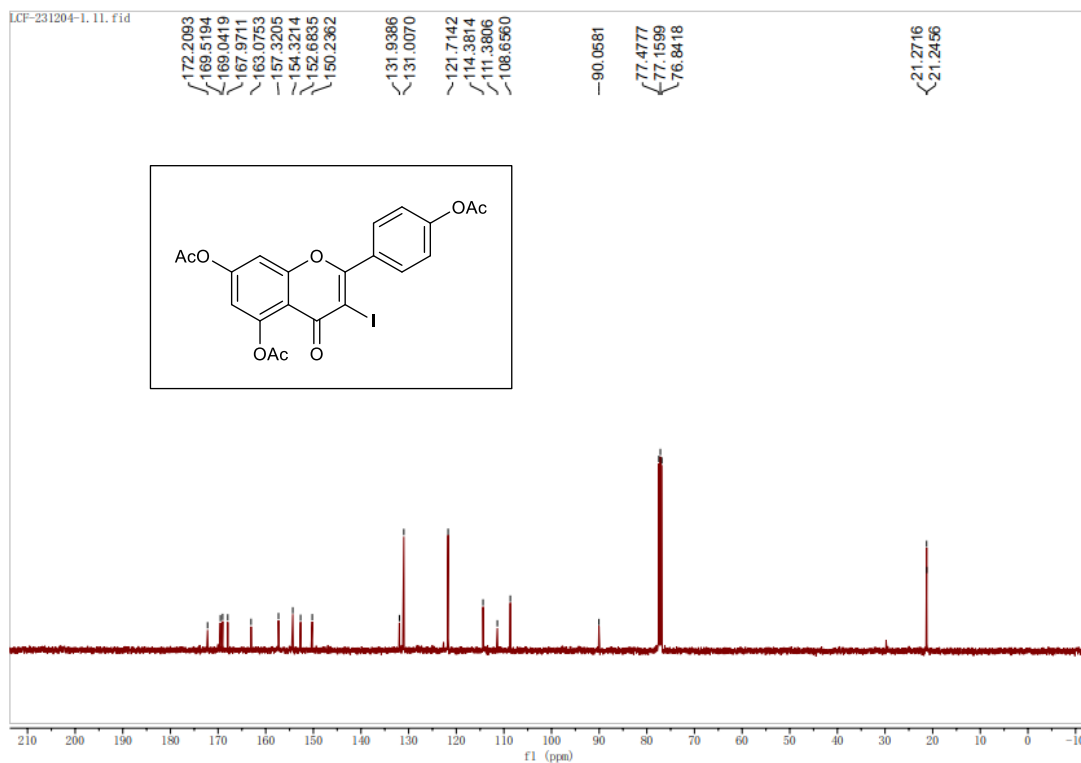

$^{13}\text{C}$  NMR Spectra of compound **2cl** in  $\text{CDCl}_3$  (101 MHz)

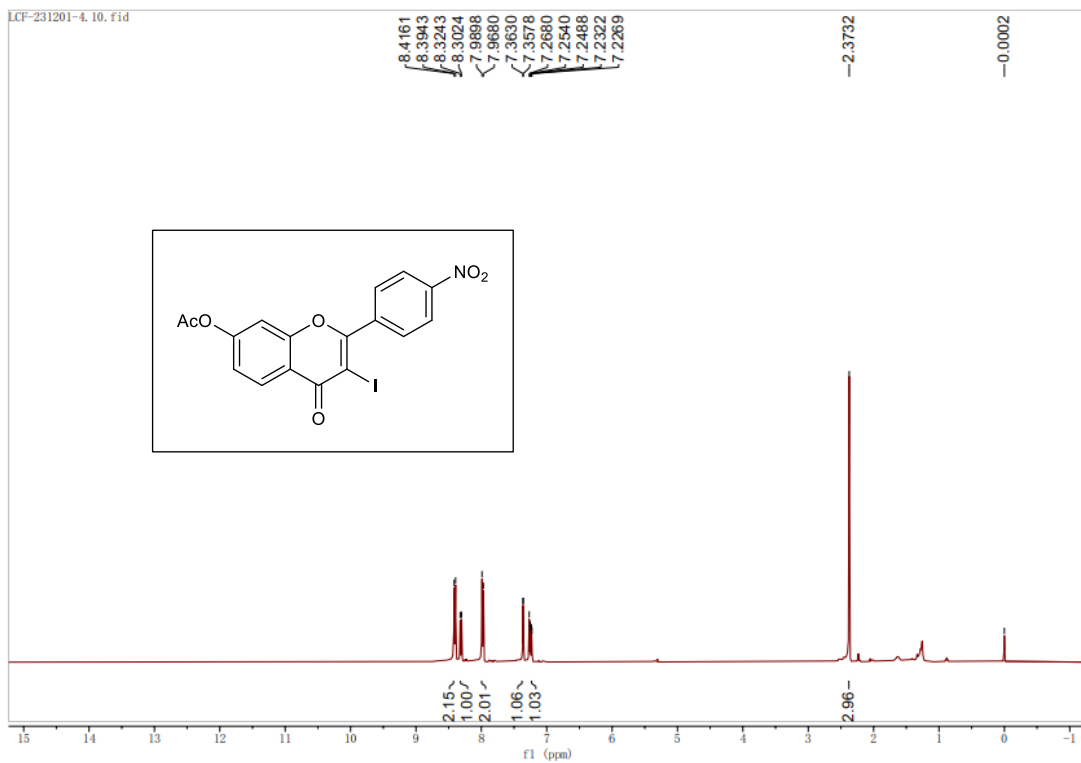

$^1\text{H}$  NMR Spectra of compound **2cm** in  $\text{CDCl}_3$  (400 MHz)

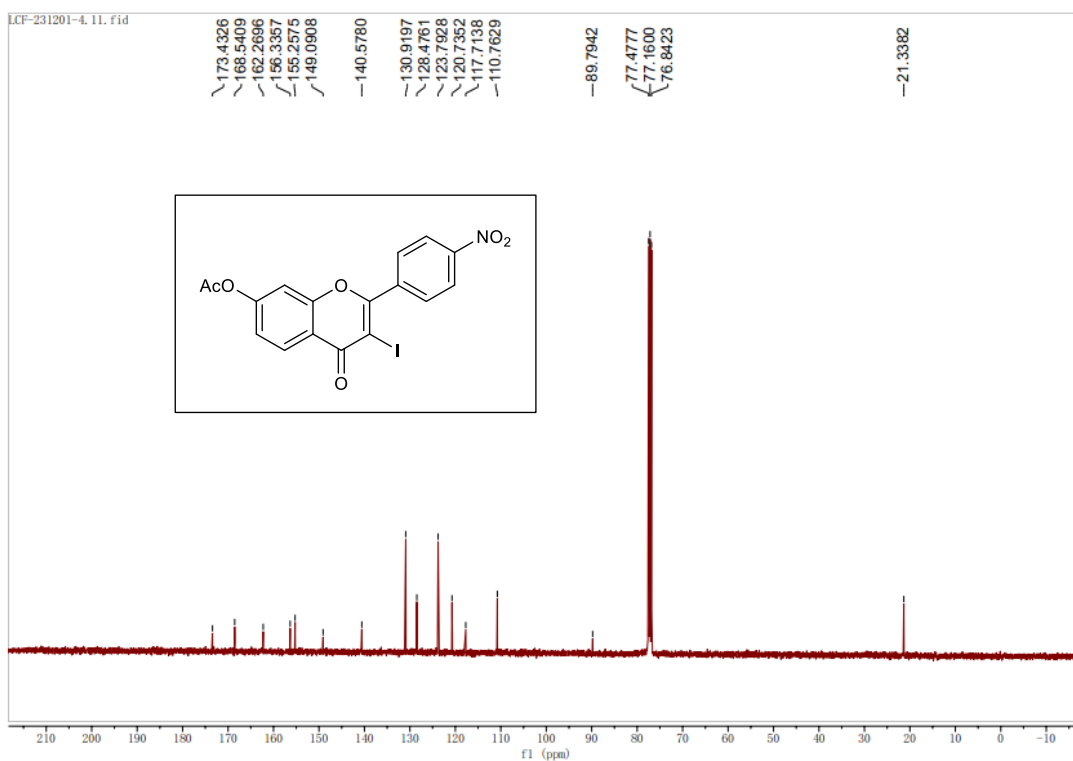

$^{13}\text{C}$  NMR Spectra of compound **2cm** in  $\text{CDCl}_3$  (101 MHz)

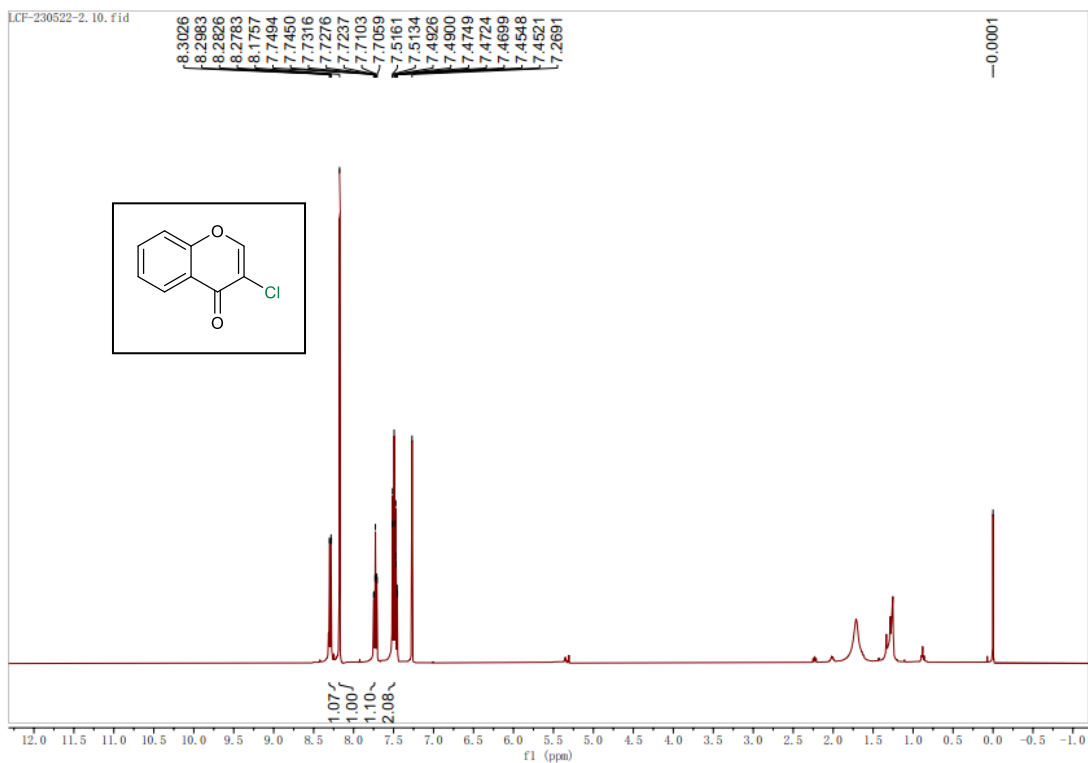

$^1\text{H}$  NMR Spectra of compound **4aa** in  $\text{CDCl}_3$  (400 MHz)

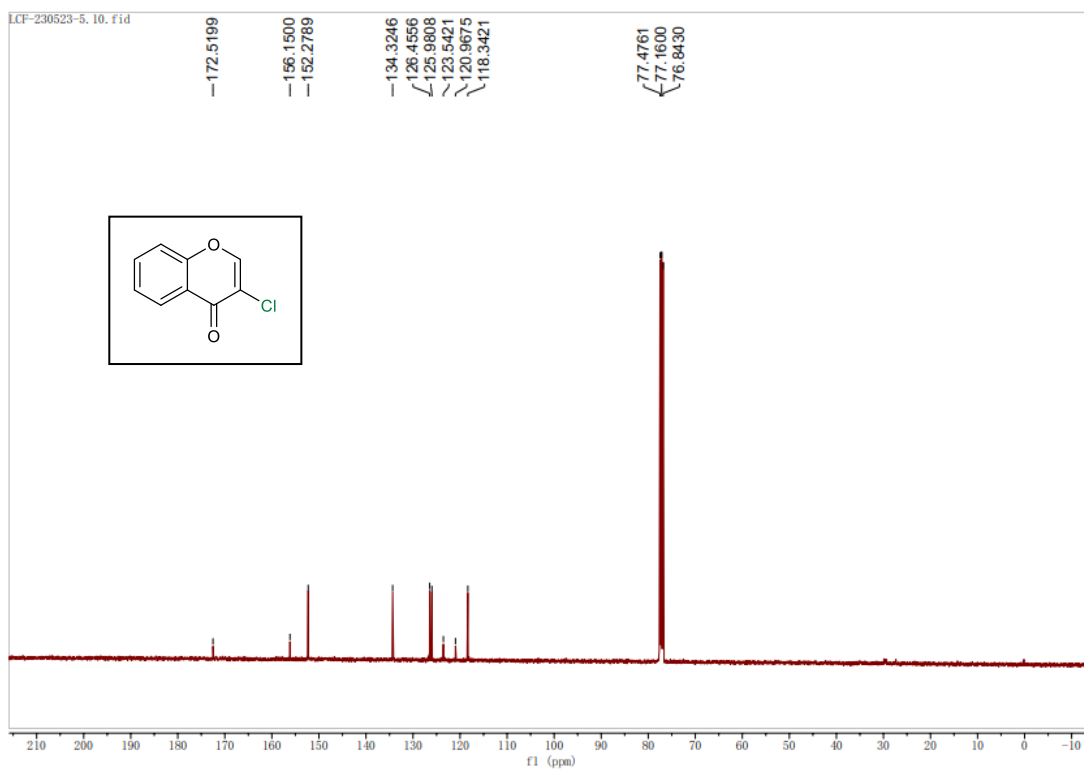

$^{13}\text{C}$  NMR Spectra of compound **4aa** in  $\text{CDCl}_3$  (101 MHz)

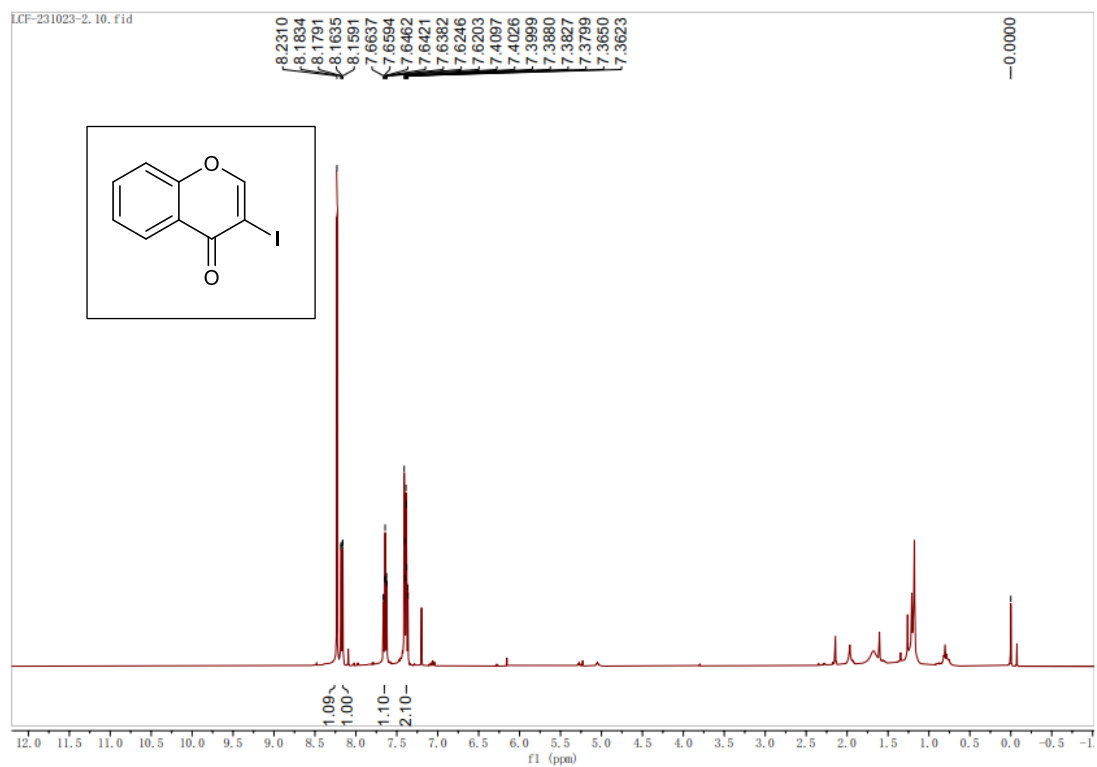

$^1\text{H}$  NMR Spectra of compound **4aa'** in  $\text{CDCl}_3$  (400 MHz)

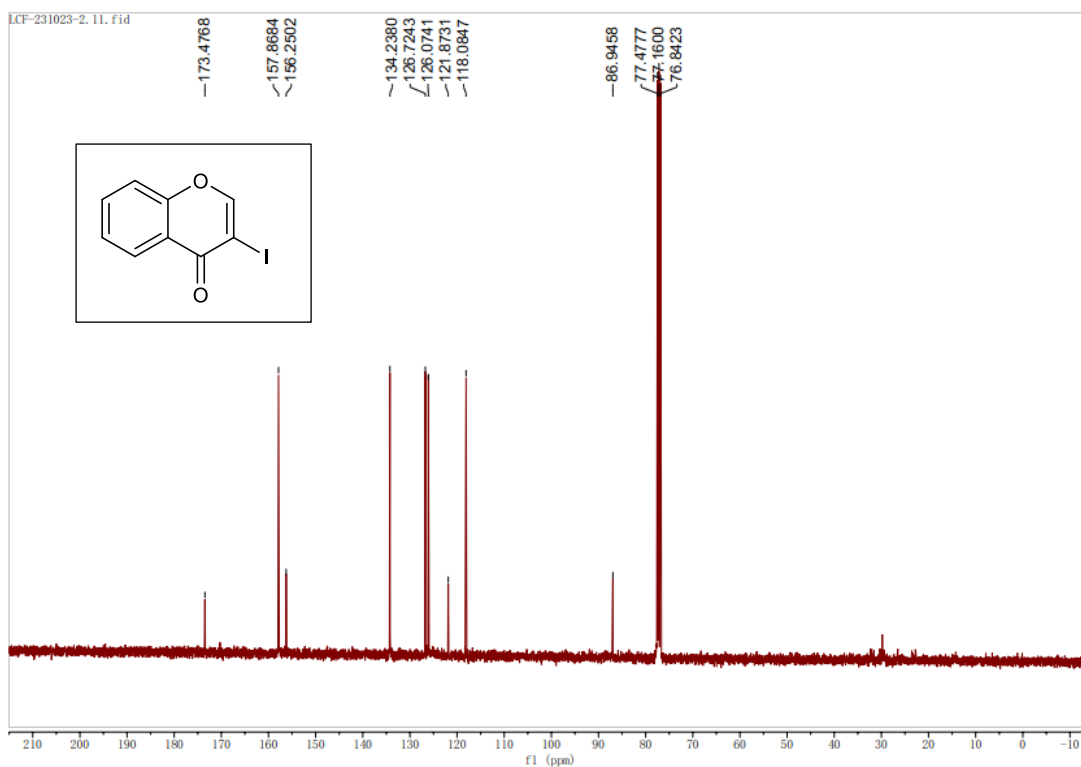

$^{13}\text{C}$  NMR Spectra of compound **4aa'** in  $\text{CDCl}_3$  (101 MHz)

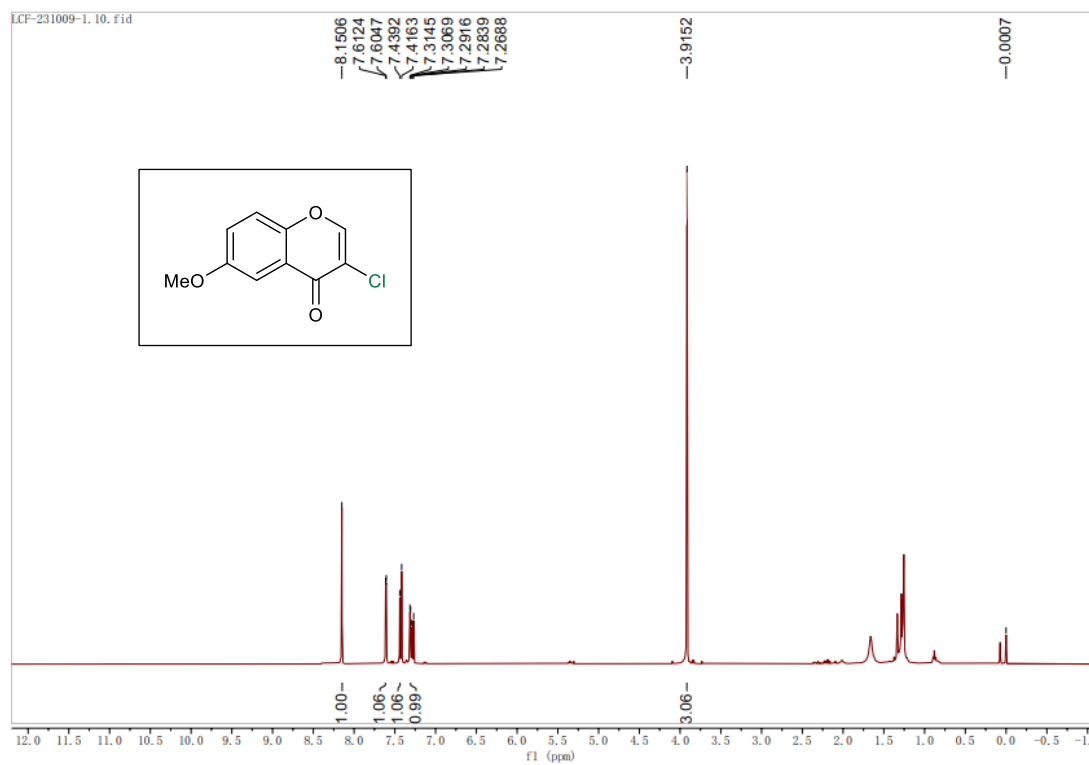

$^1\text{H}$  NMR Spectra of compound **4ab** in  $\text{CDCl}_3$  (400 MHz)

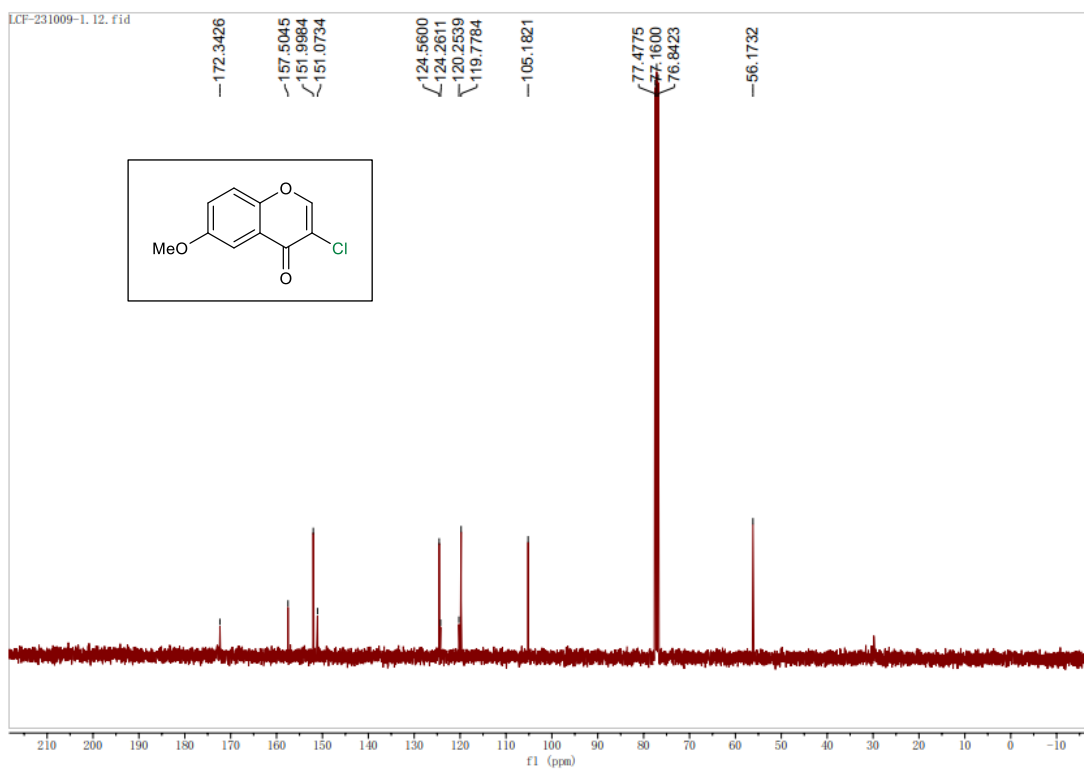

$^{13}\text{C}$  NMR Spectra of compound **4ab** in  $\text{CDCl}_3$  (101 MHz)

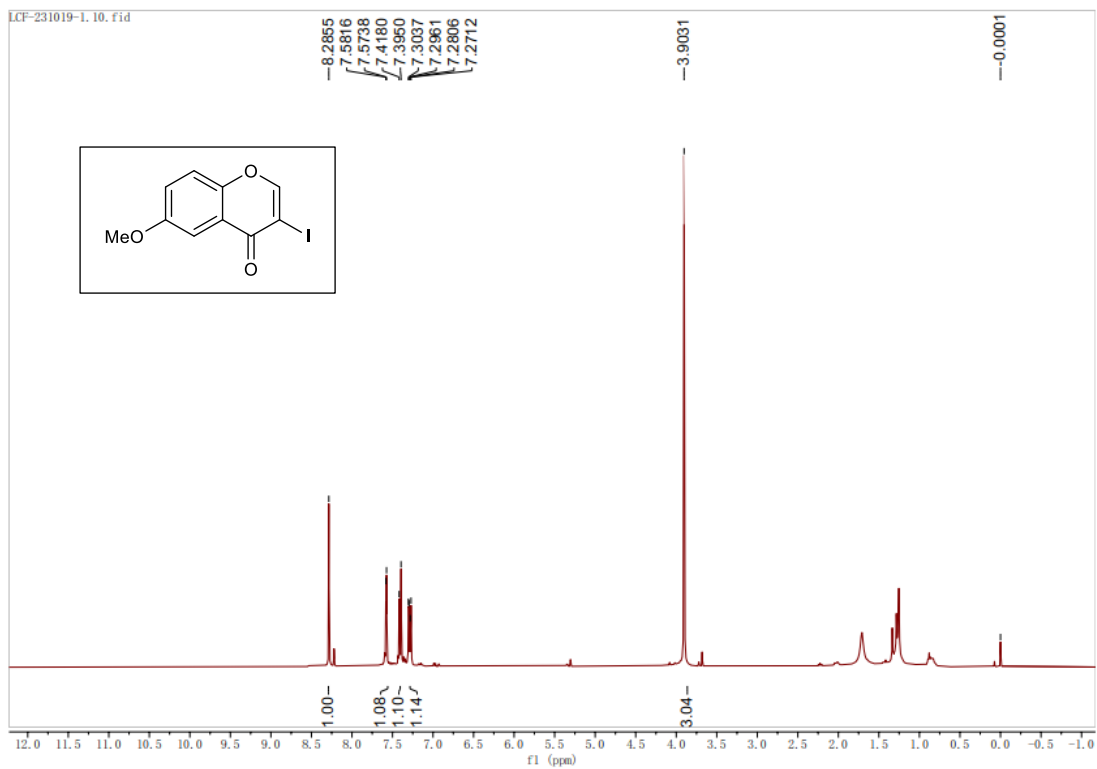

$^1\text{H}$  NMR Spectra of compound **4ab'** in  $\text{CDCl}_3$  (400 MHz)



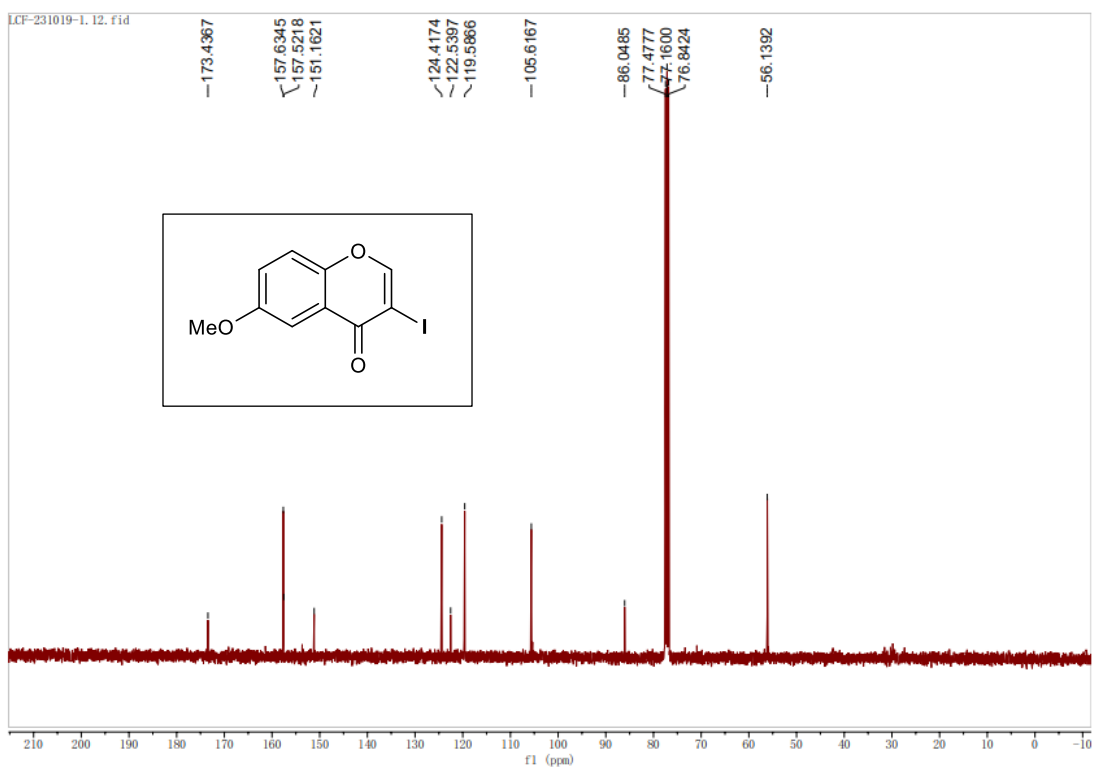

$^{13}\text{C}$  NMR Spectra of compound **4ab'** in  $\text{CDCl}_3$  (101 MHz)

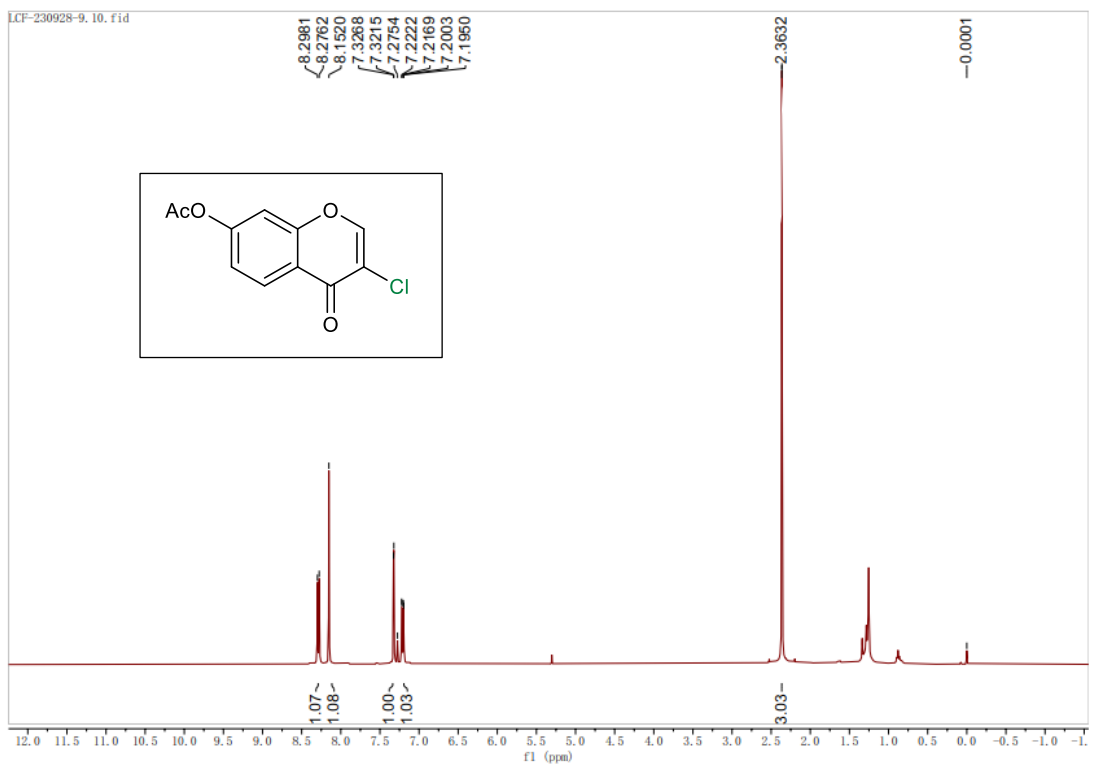

$^1\text{H}$  NMR Spectra of compound **4ac** in  $\text{CDCl}_3$  (400 MHz)

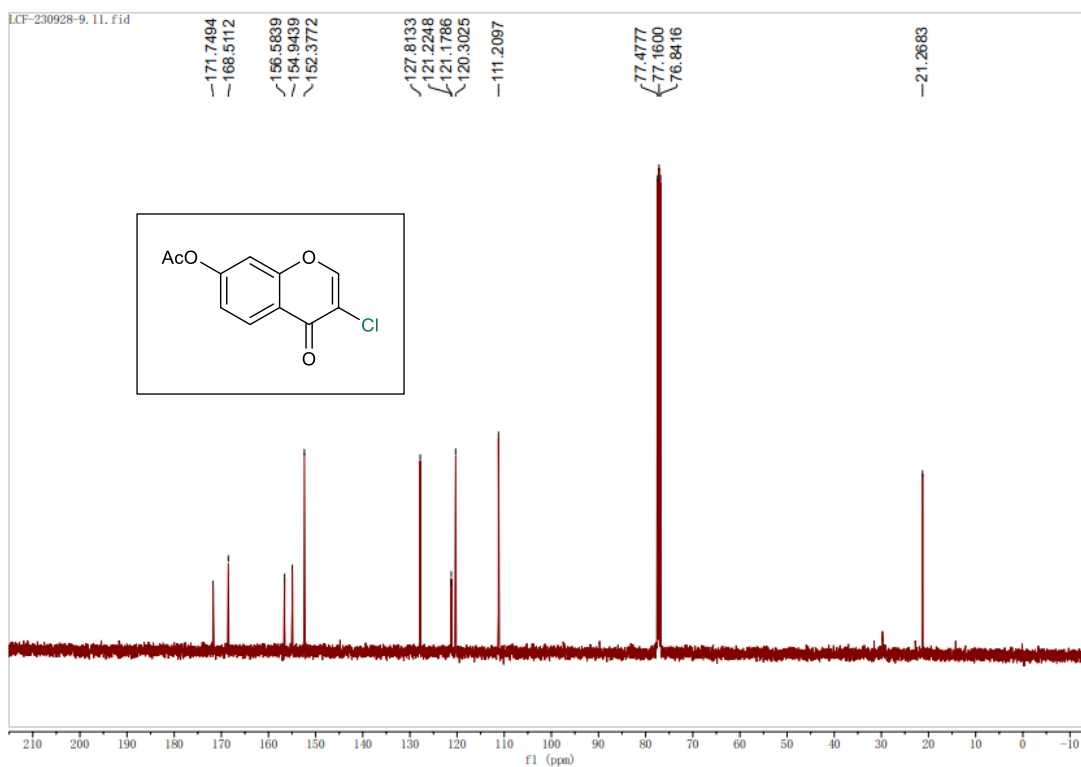

$^{13}\text{C}$  NMR Spectra of compound **4ac** in  $\text{CDCl}_3$  (101 MHz)

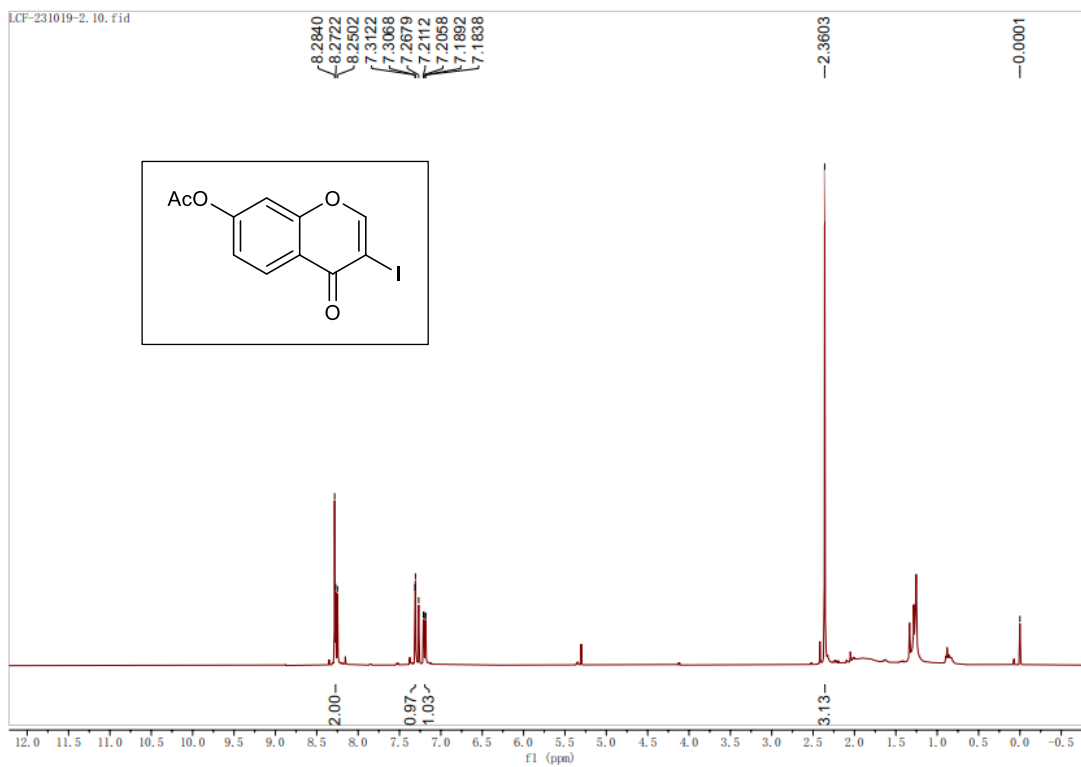

$^1\text{H}$  NMR Spectra of compound **4ac'** in  $\text{CDCl}_3$  (400 MHz)

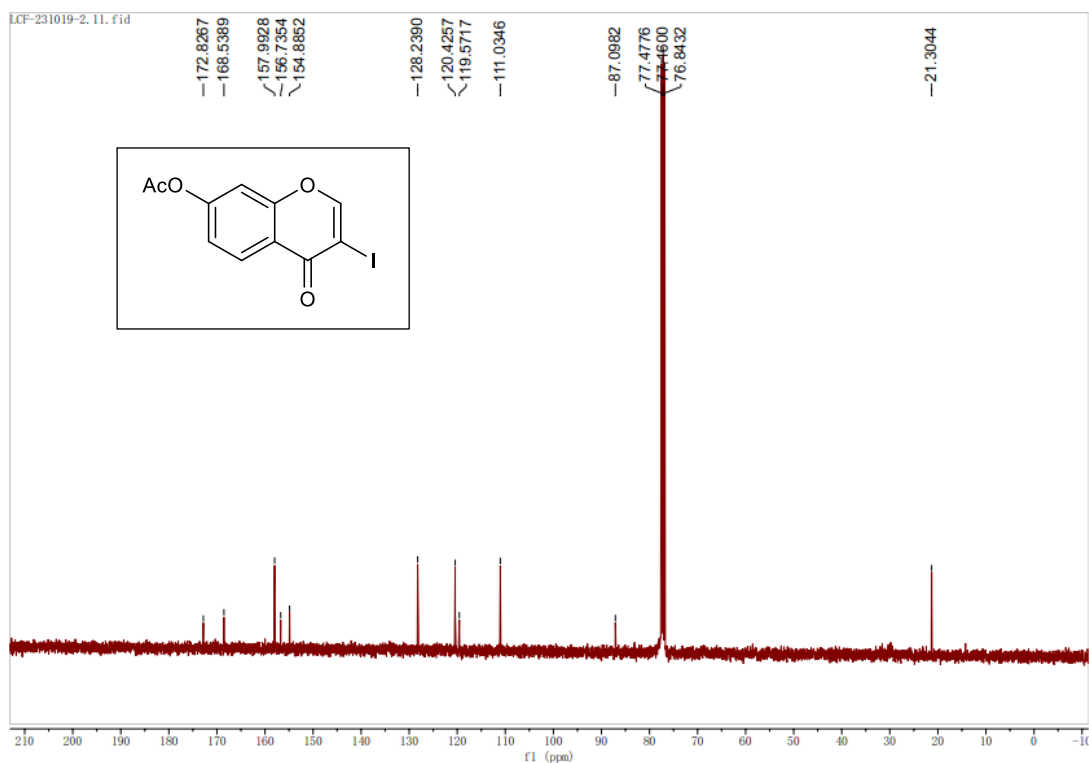

$^{13}\text{C}$  NMR Spectra of compound **4ac'** in  $\text{CDCl}_3$  (101 MHz)

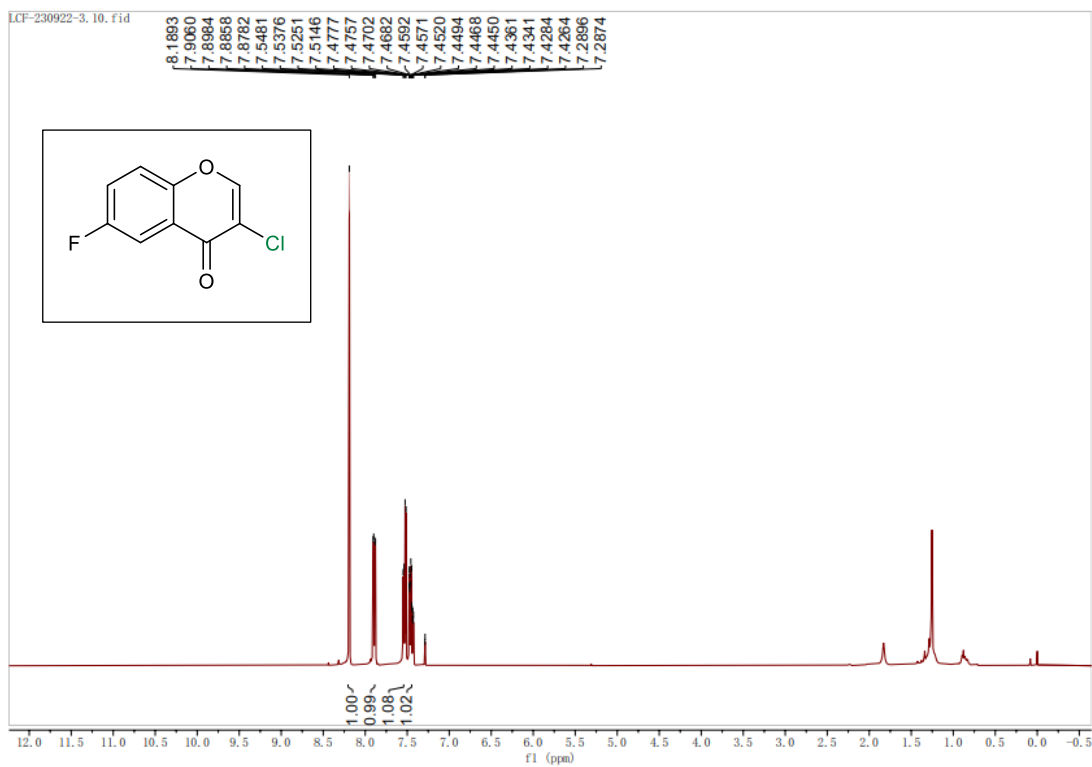

$^1\text{H}$  NMR Spectra of compound **4ad** in  $\text{CDCl}_3$  (400 MHz)

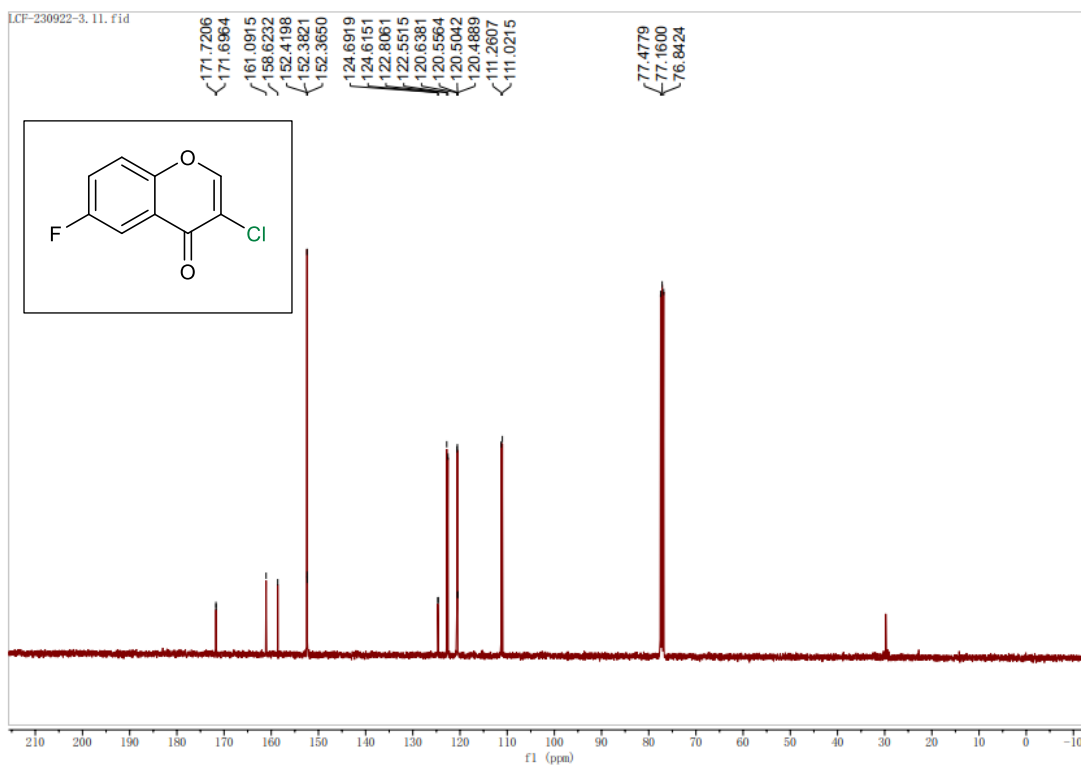

$^{13}\text{C}$  NMR Spectra of compound **4ad** in  $\text{CDCl}_3$  (101 MHz)

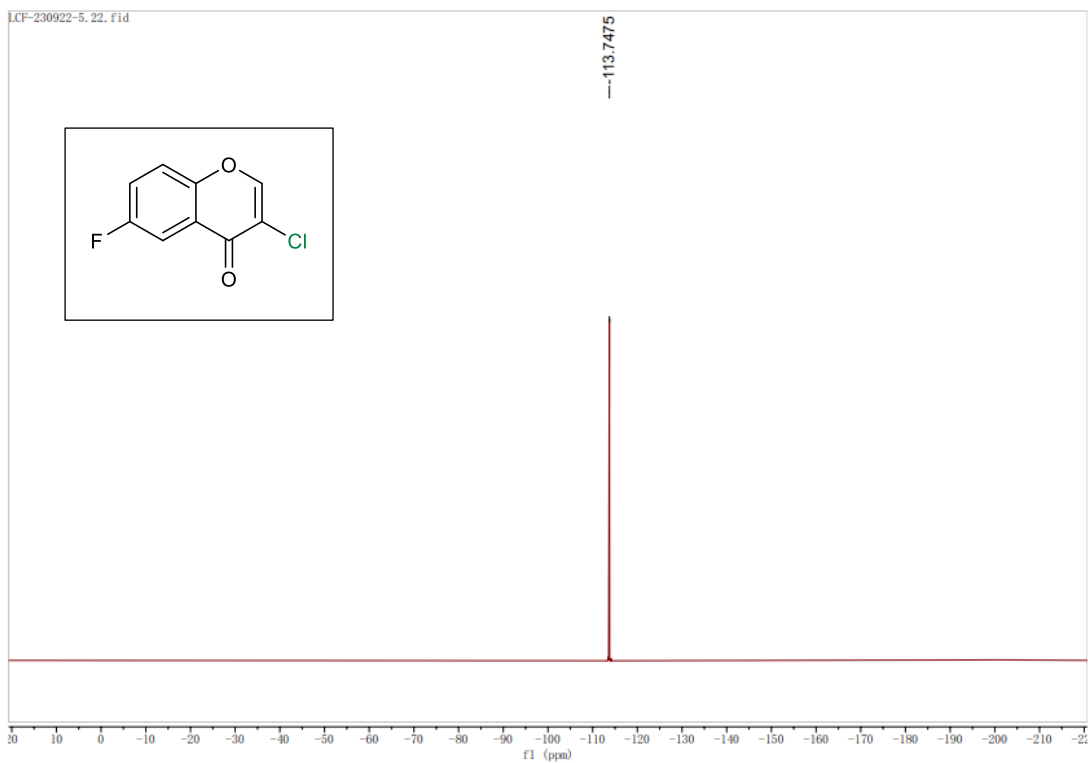

$^{19}\text{F}$  NMR Spectra of compound **4ad** in  $\text{CDCl}_3$  (377 MHz)

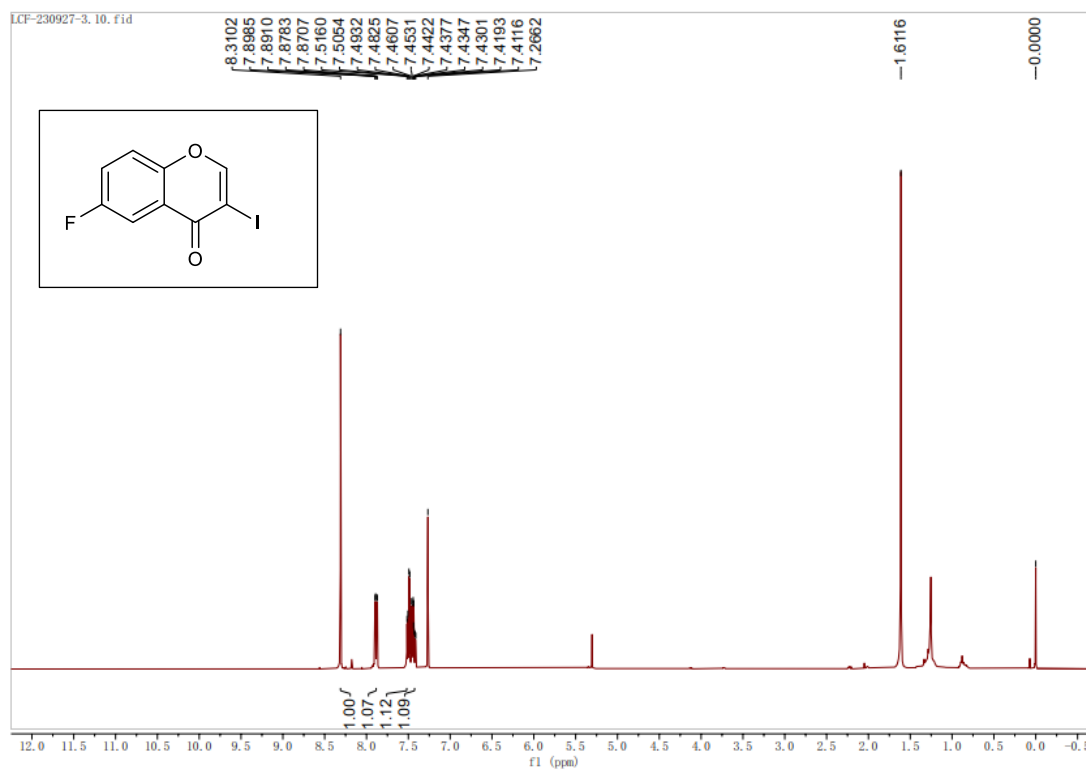

$^1\text{H}$  NMR Spectra of compound **4ad'** in  $\text{CDCl}_3$  (400 MHz)

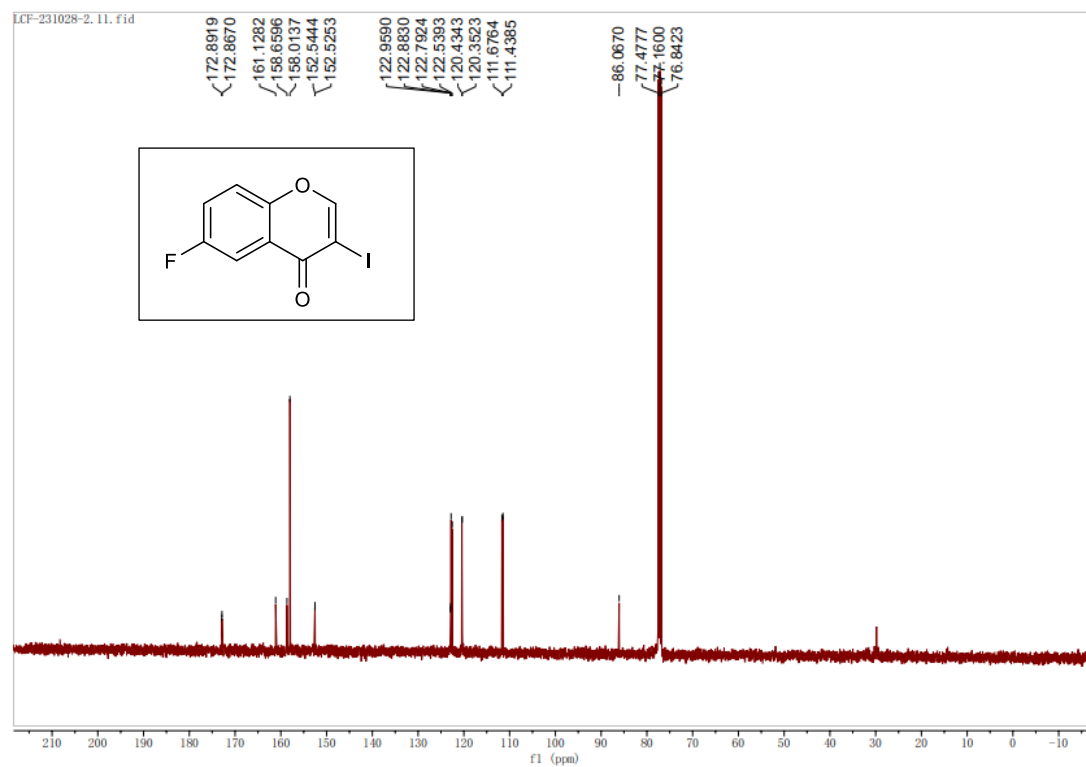

$^{13}\text{C}$  NMR Spectra of compound **4ad'** in  $\text{CDCl}_3$  (101 MHz)

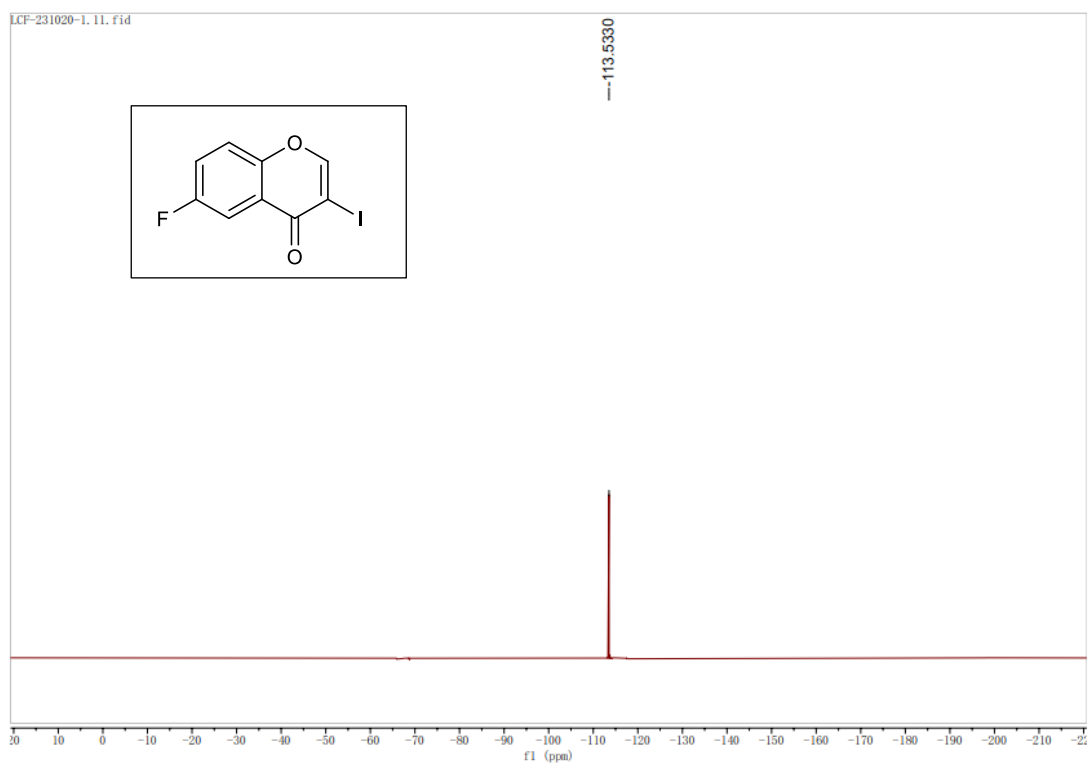

$^{19}\text{F}$  NMR Spectra of compound **4ad'** in  $\text{CDCl}_3$  (377 MHz)

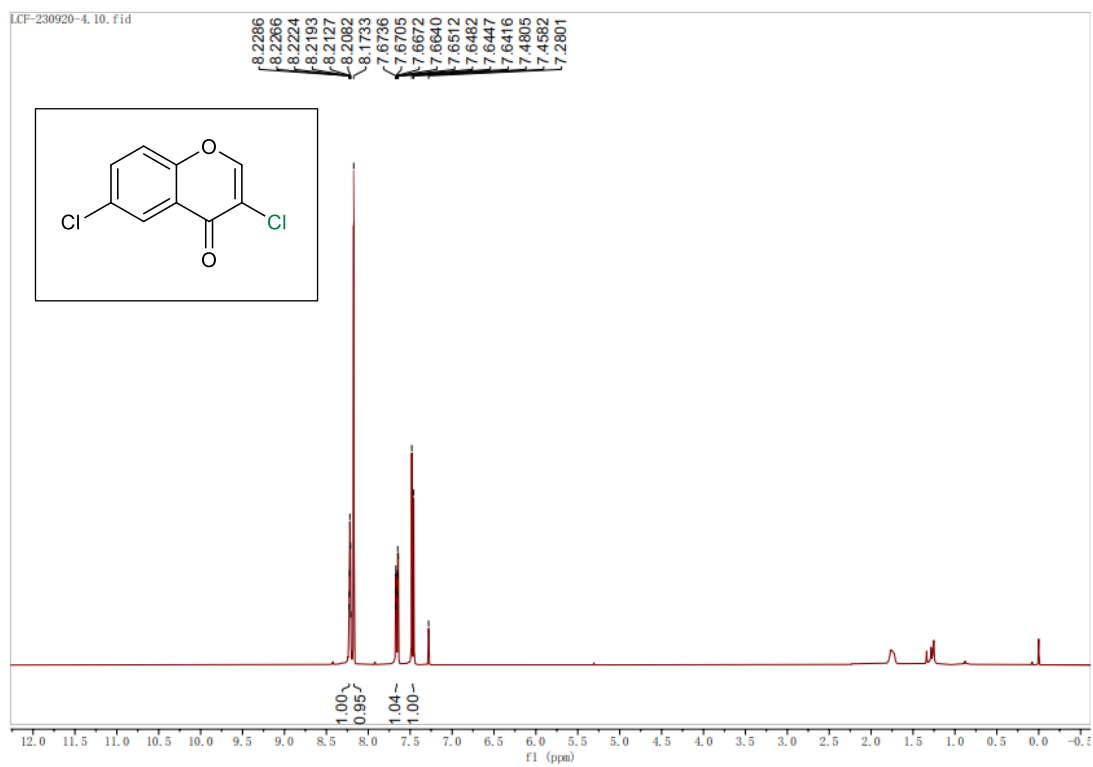

$^1\text{H}$  NMR Spectra of compound **4ae** in  $\text{CDCl}_3$  (400 MHz)

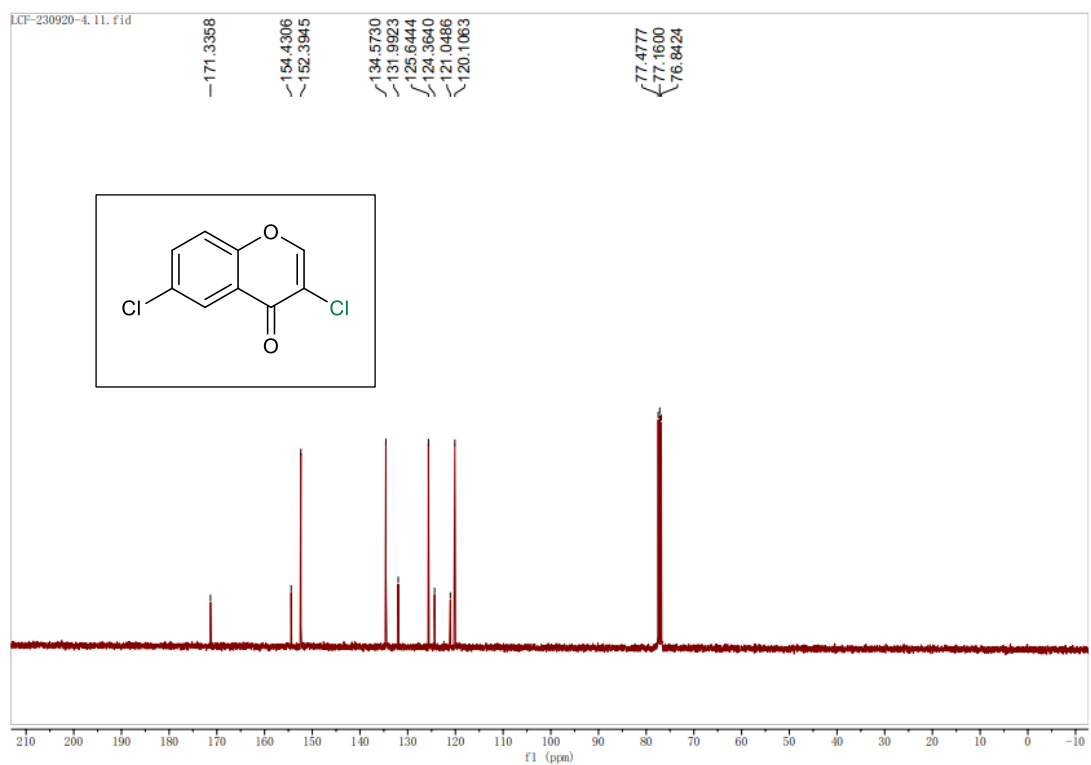

$^{13}\text{C}$  NMR Spectra of compound **4ae** in  $\text{CDCl}_3$  (101 MHz)

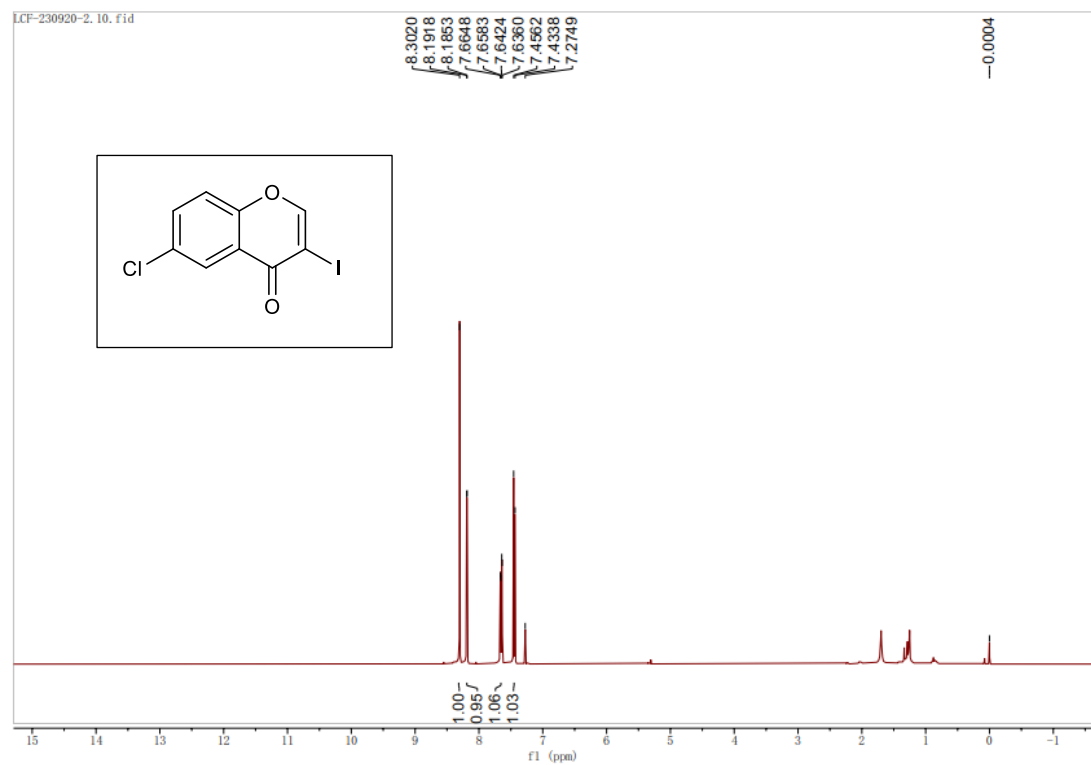

$^1\text{H}$  NMR Spectra of compound **4ae'** in  $\text{CDCl}_3$  (400 MHz)

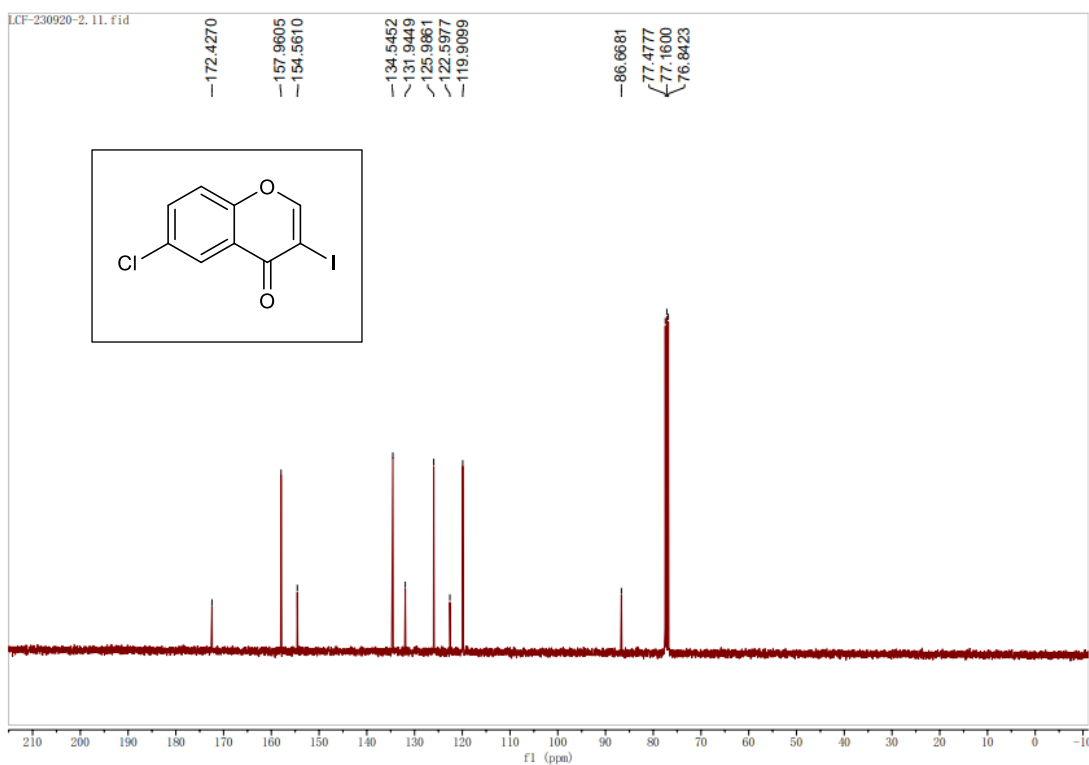

$^{13}\text{C}$  NMR Spectra of compound **4ae'** in  $\text{CDCl}_3$  (101 MHz)

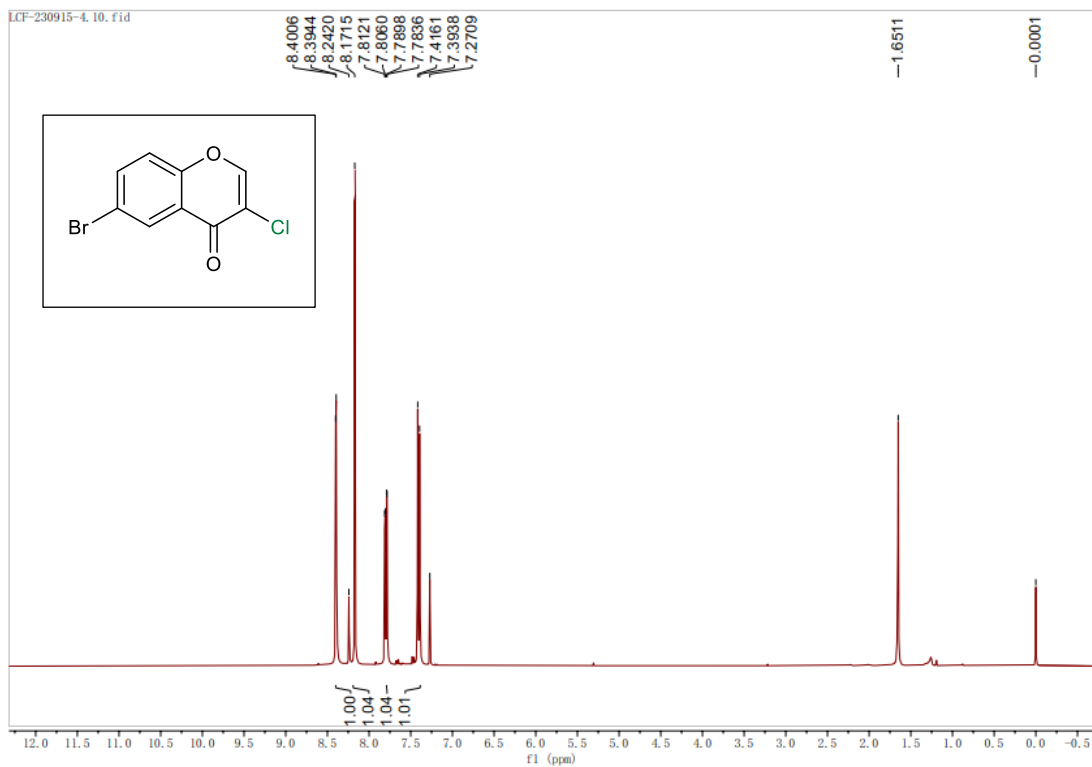

$^1\text{H}$  NMR Spectra of compound **4af** in  $\text{CDCl}_3$  (400 MHz)



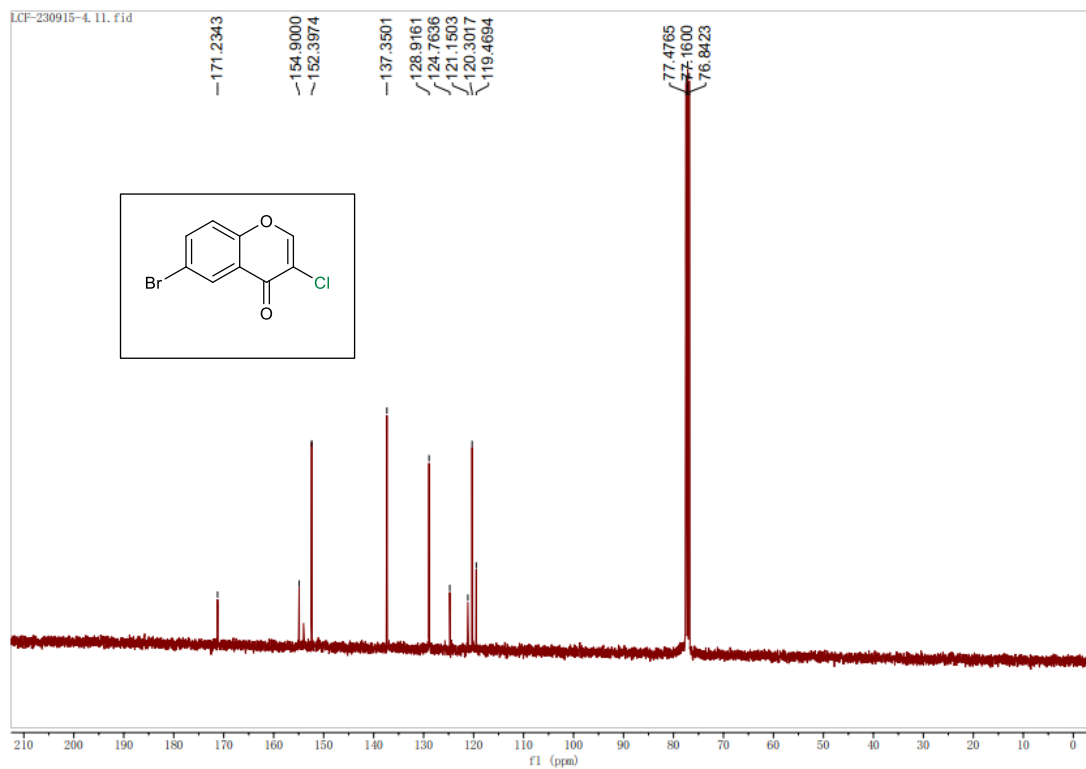

$^{13}\text{C}$  NMR Spectra of compound **4af** in  $\text{CDCl}_3$  (101 MHz)

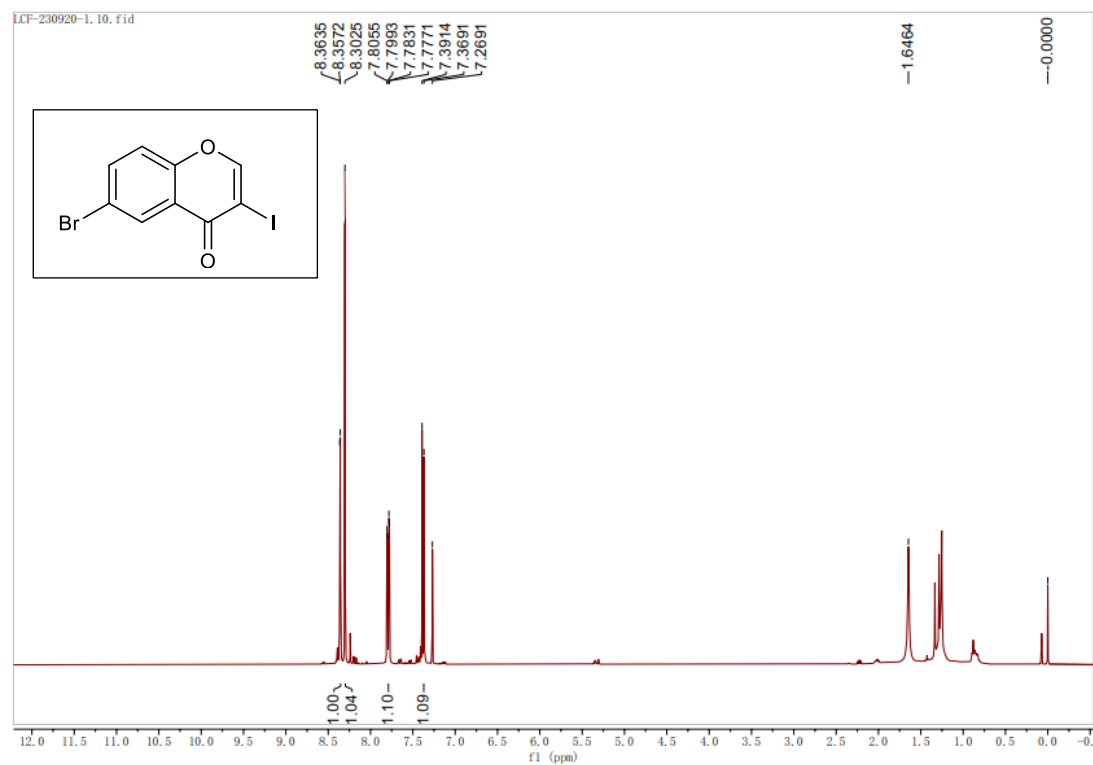

$^1\text{H}$  NMR Spectra of compound **4af'** in  $\text{CDCl}_3$  (400 MHz)

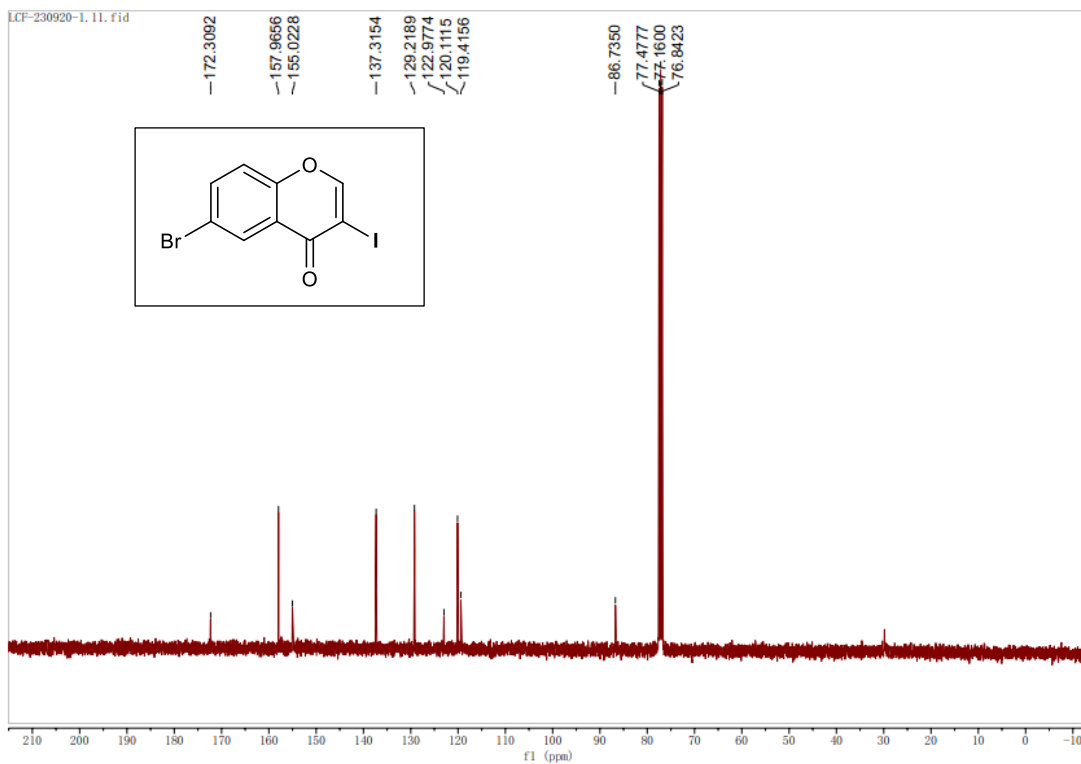

$^{13}\text{C}$  NMR Spectra of compound **4af'** in  $\text{CDCl}_3$  (101 MHz)

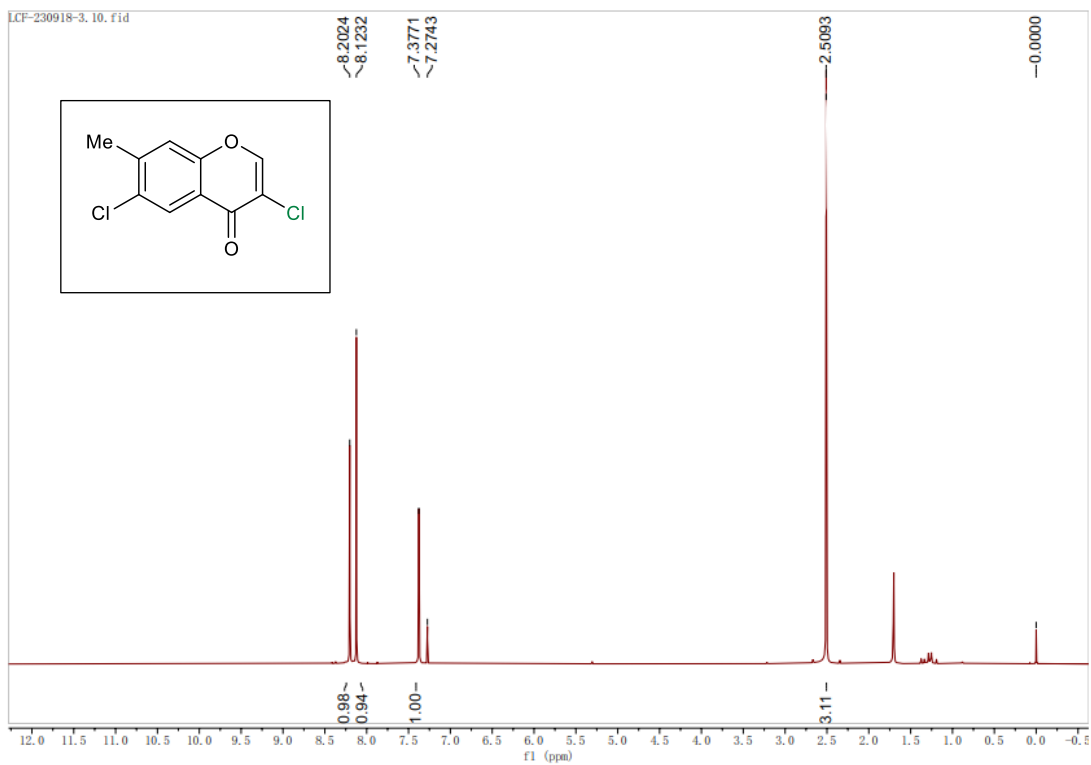

$^1\text{H}$  NMR Spectra of compound **4ag** in  $\text{CDCl}_3$  (400 MHz)

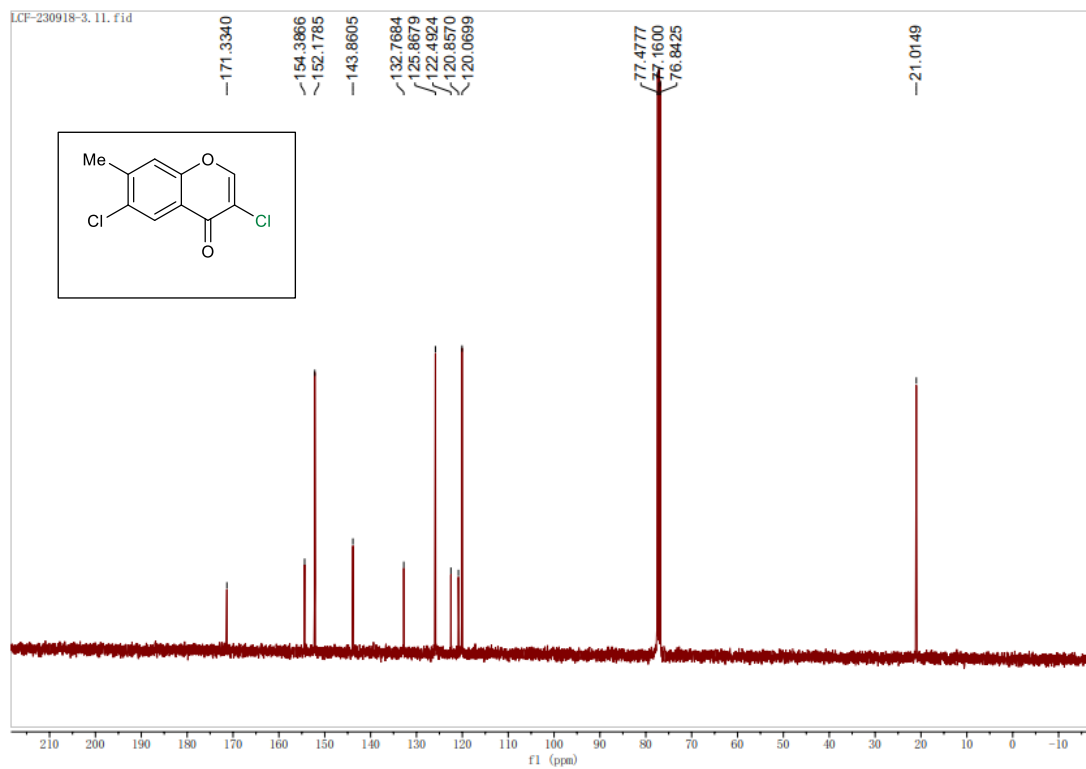

$^{13}\text{C}$  NMR Spectra of compound **4ag** in  $\text{CDCl}_3$  (101 MHz)

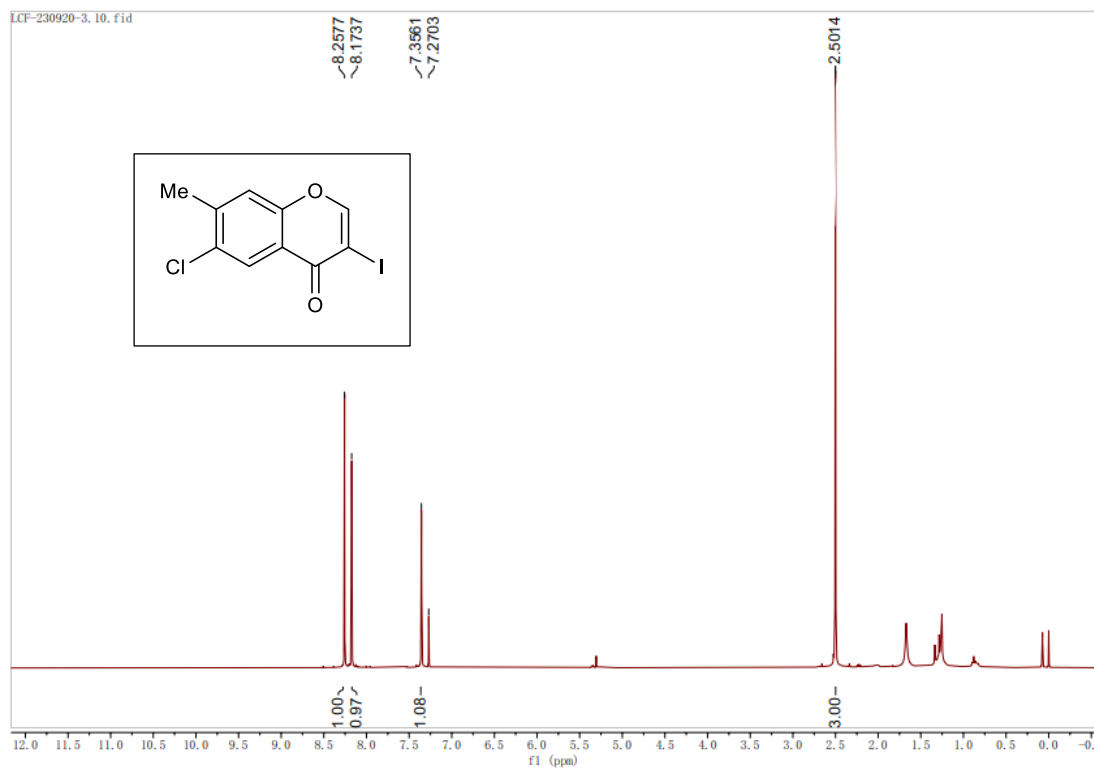

$^1\text{H}$  NMR Spectra of compound **4ag'** in  $\text{CDCl}_3$  (400 MHz)

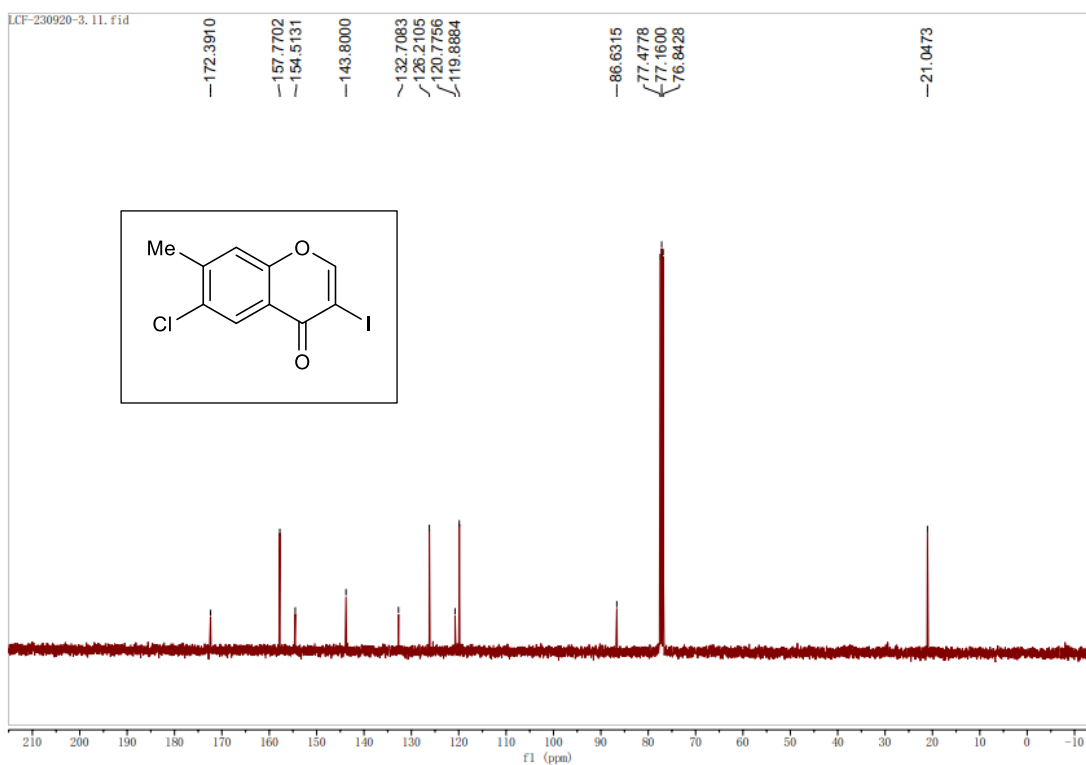

$^{13}\text{C}$  NMR Spectra of compound **4ag'** in  $\text{CDCl}_3$  (101 MHz)

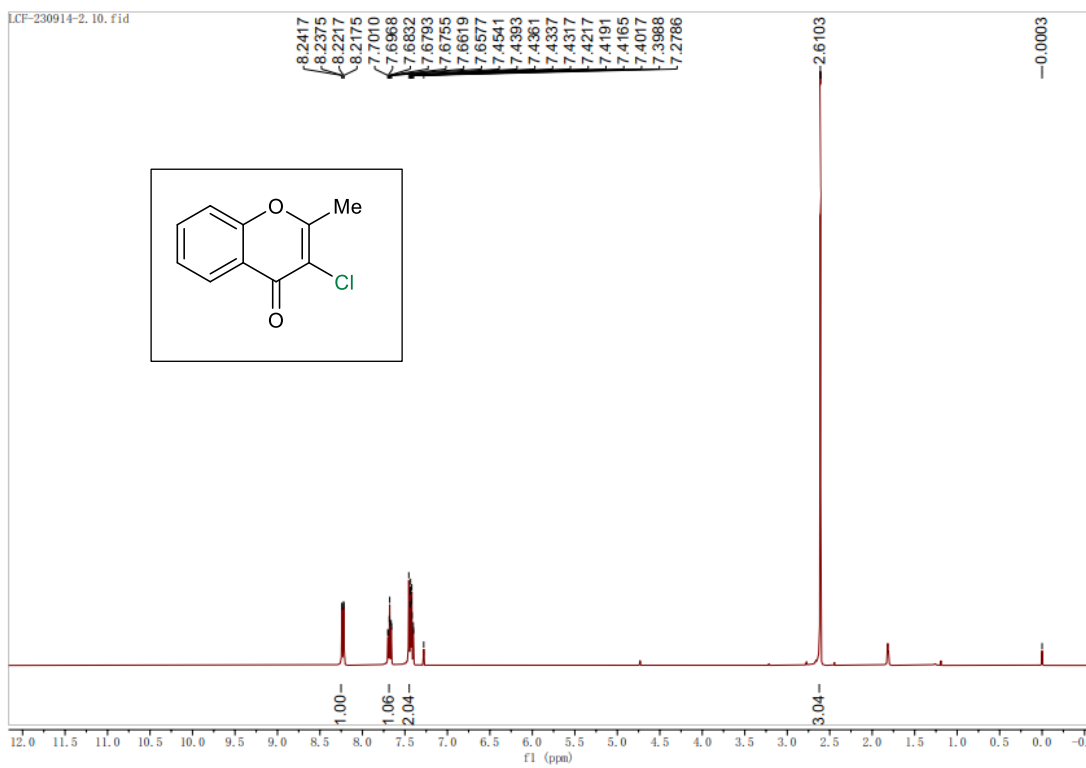

$^1\text{H}$  NMR Spectra of compound **4ah** in  $\text{CDCl}_3$  (400 MHz)

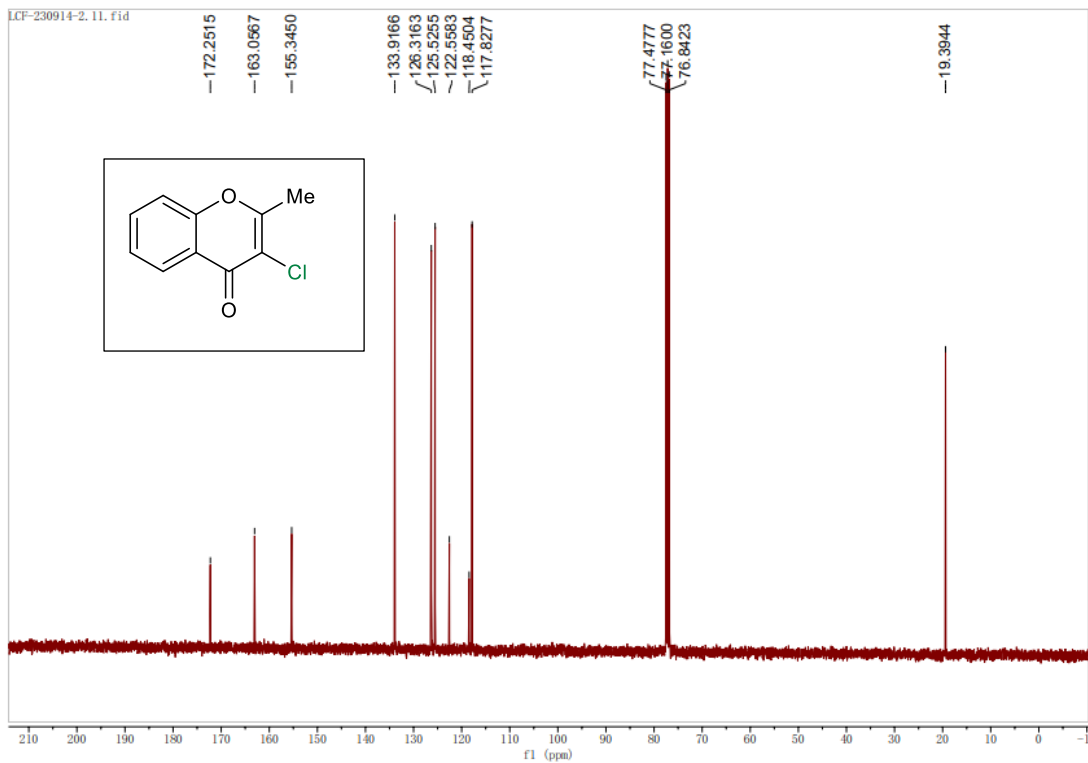

$^{13}\text{C}$  NMR Spectra of compound **4ah** in  $\text{CDCl}_3$  (101 MHz)

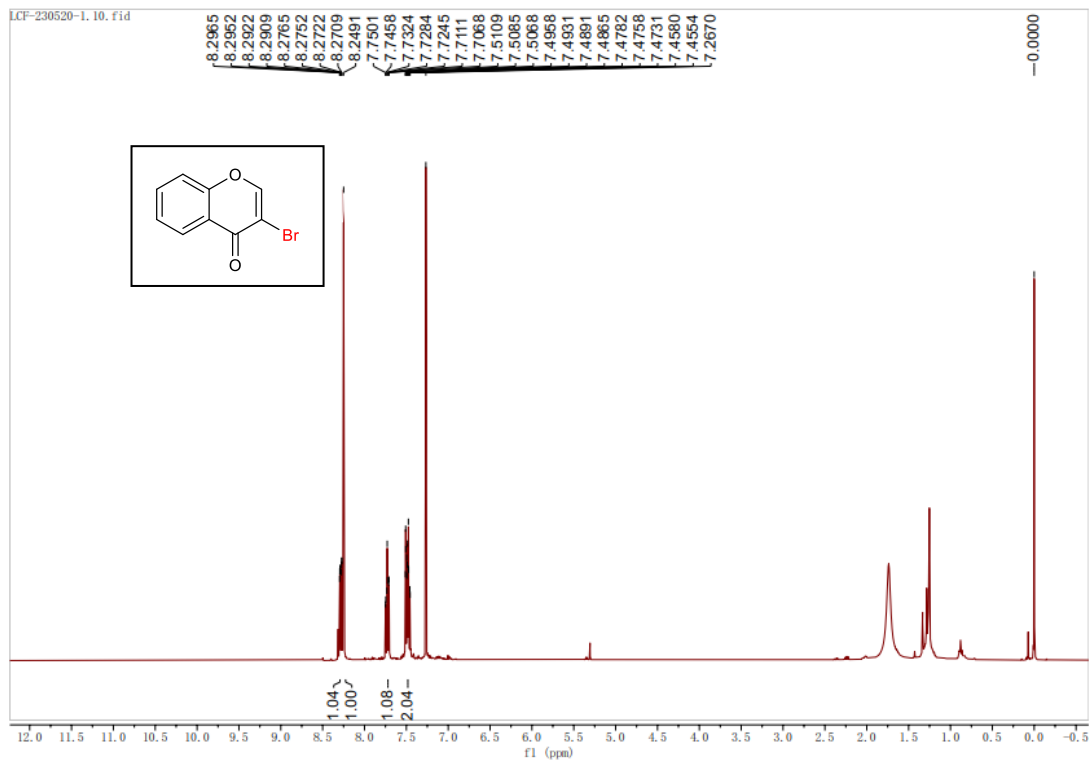

$^1\text{H}$  NMR Spectra of compound **4ba** in  $\text{CDCl}_3$  (400 MHz)

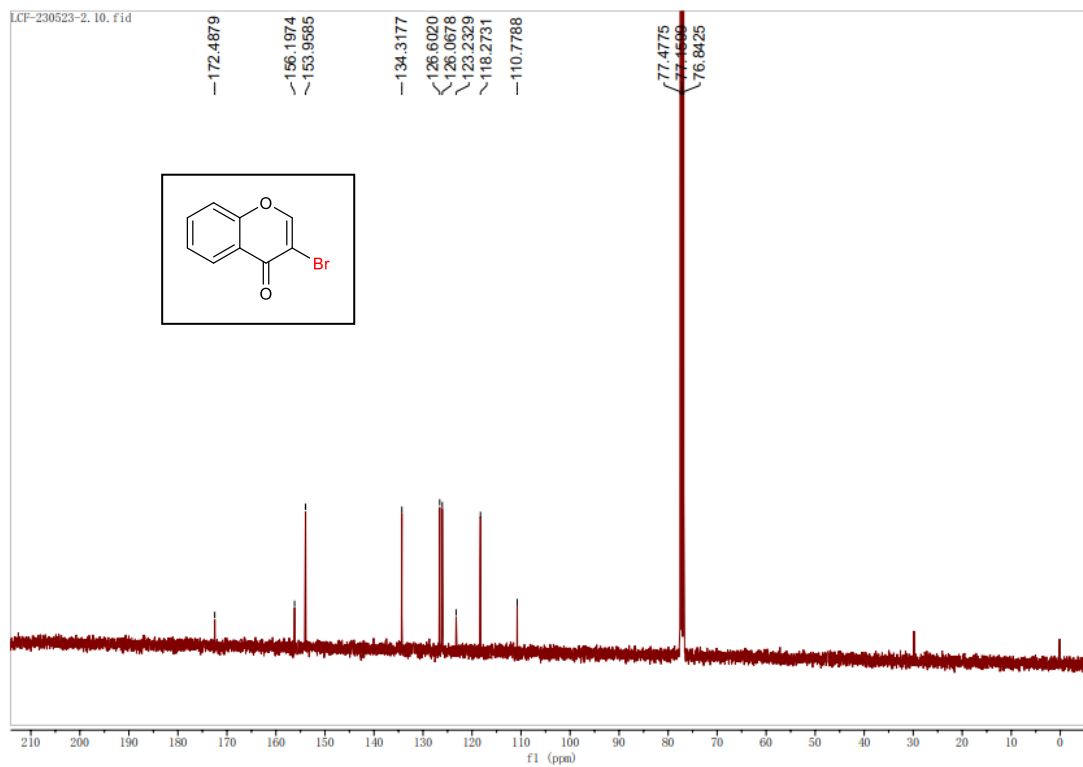

$^{13}\text{C}$  NMR Spectra of compound **4ba** in  $\text{CDCl}_3$  (101 MHz)

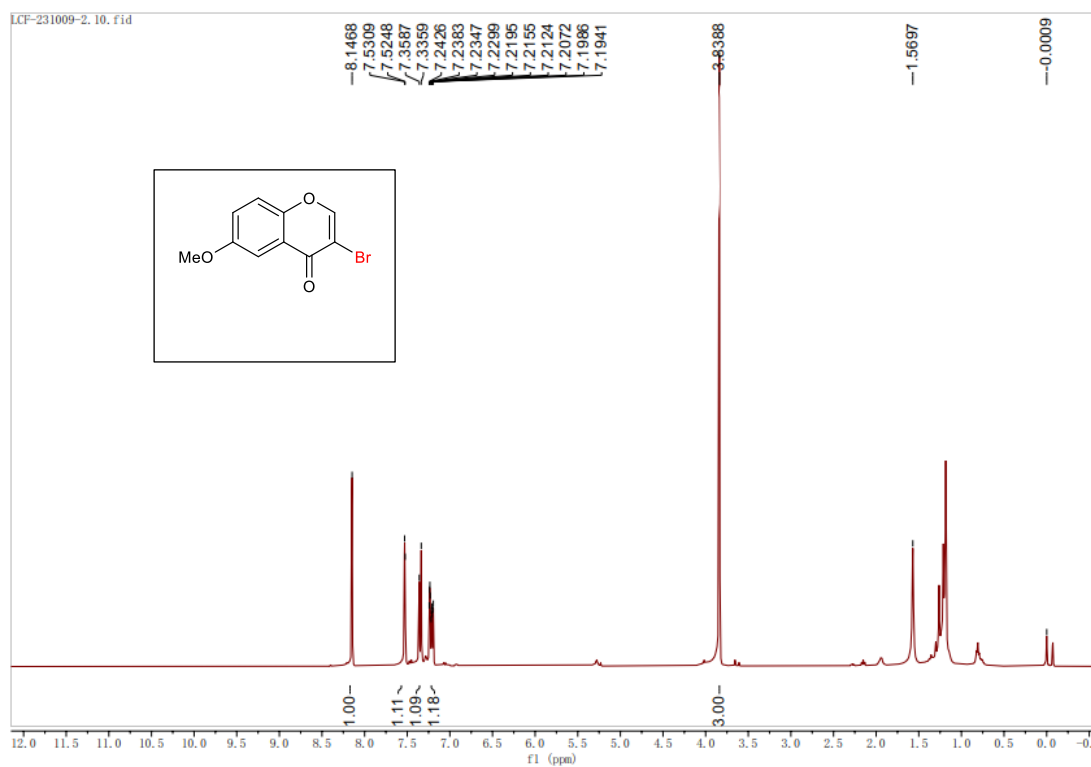

$^1\text{H}$  NMR Spectra of compound **4bb** in  $\text{CDCl}_3$  (400 MHz)

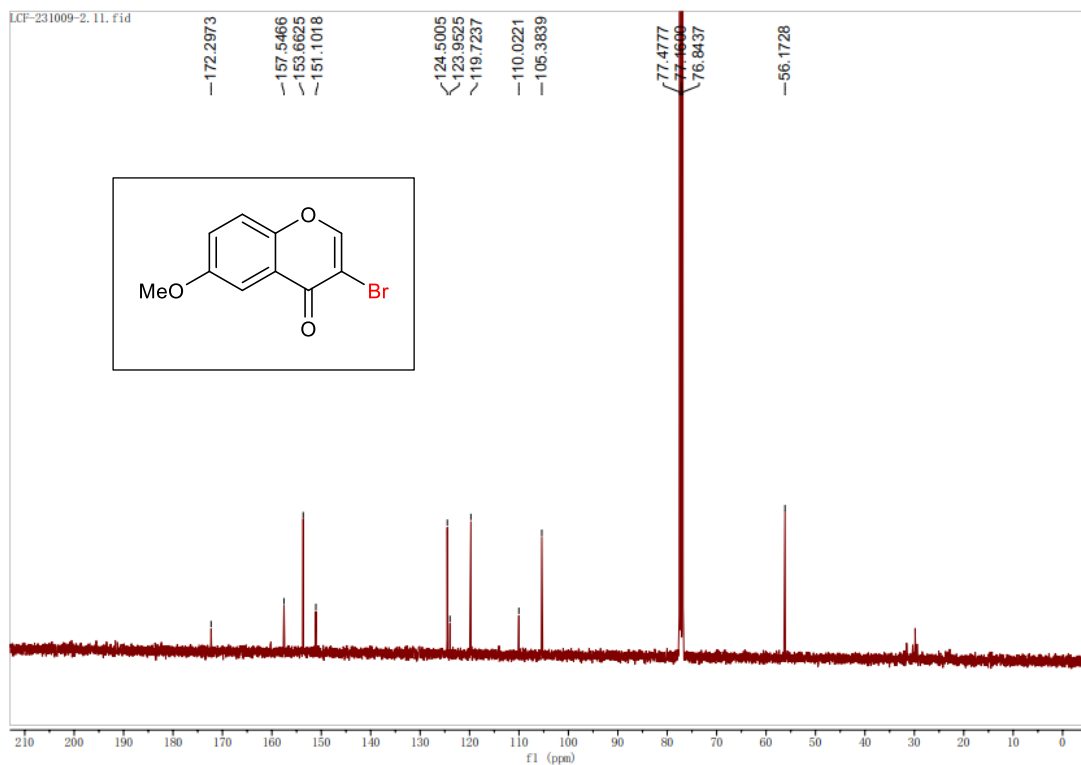

$^{13}\text{C}$  NMR Spectra of compound **4bb** in  $\text{CDCl}_3$  (101 MHz)

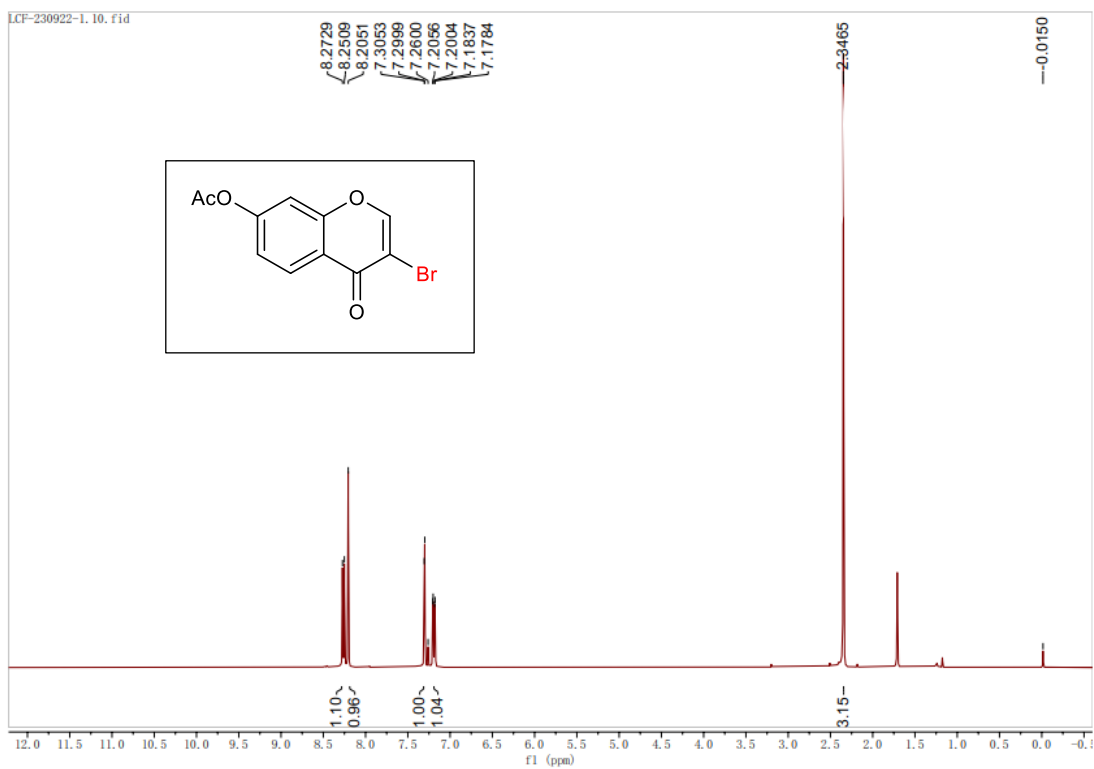

$^1\text{H}$  NMR Spectra of compound **4bc** in  $\text{CDCl}_3$  (400 MHz)

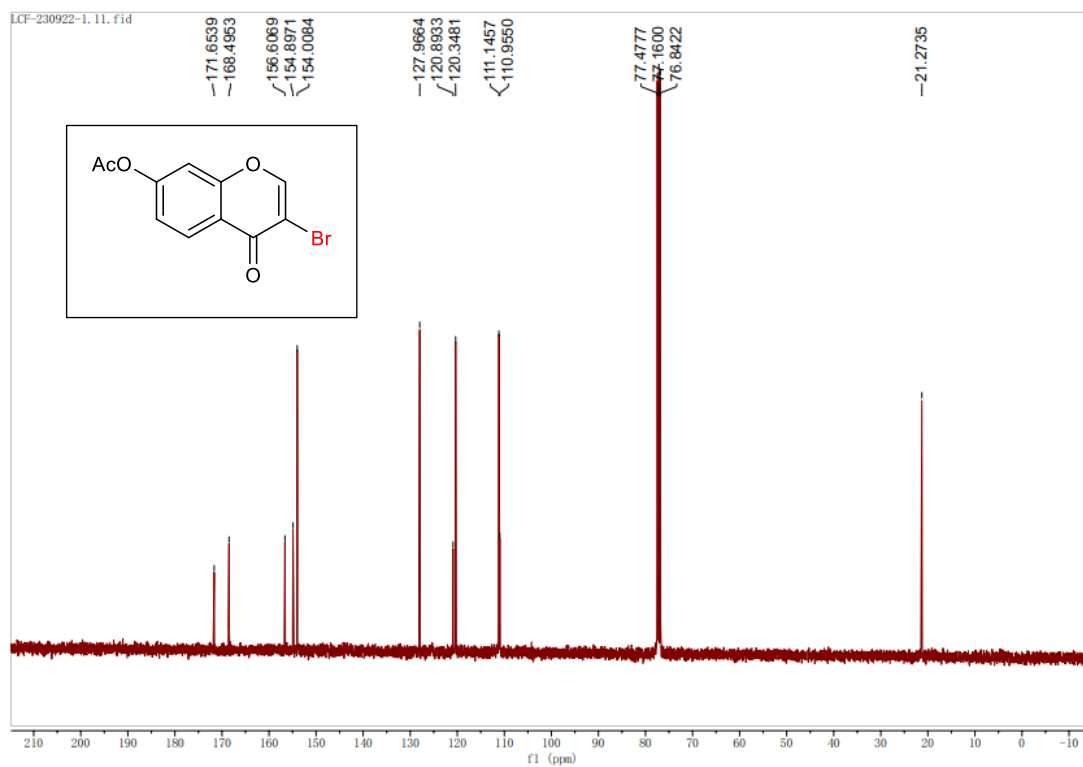

$^{13}\text{C}$  NMR Spectra of compound **4bc** in  $\text{CDCl}_3$  (101 MHz)

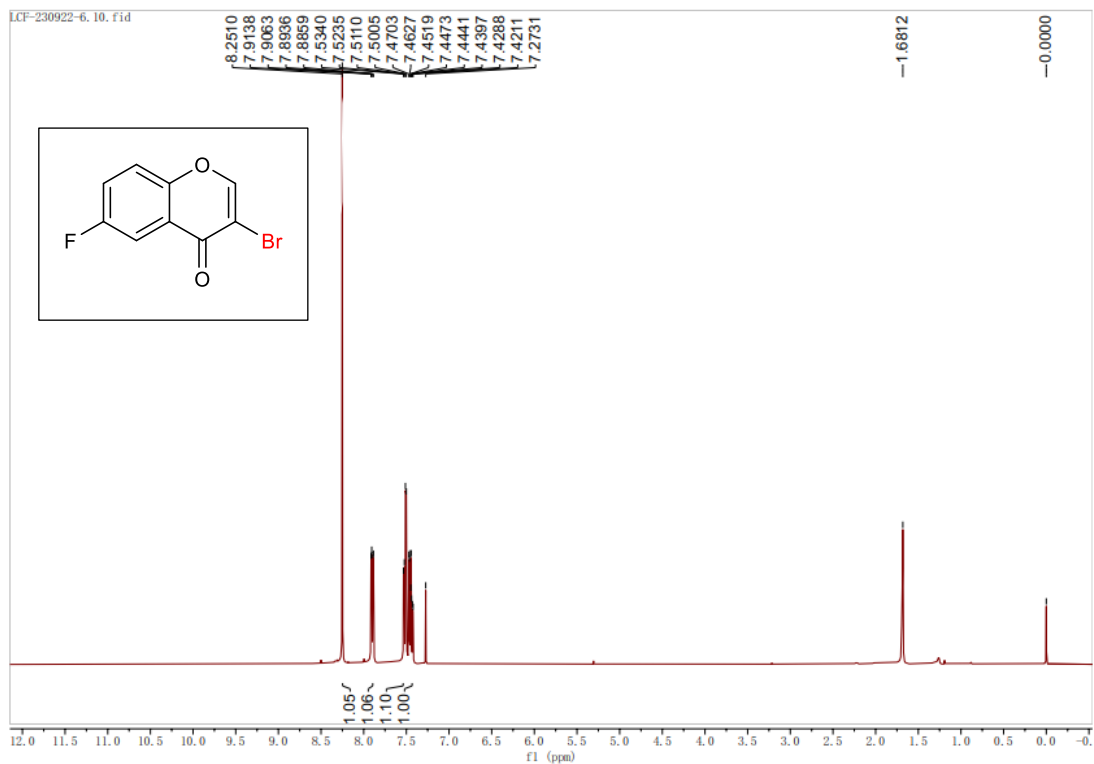

$^1\text{H}$  NMR Spectra of compound **4bd** in  $\text{CDCl}_3$  (400 MHz)



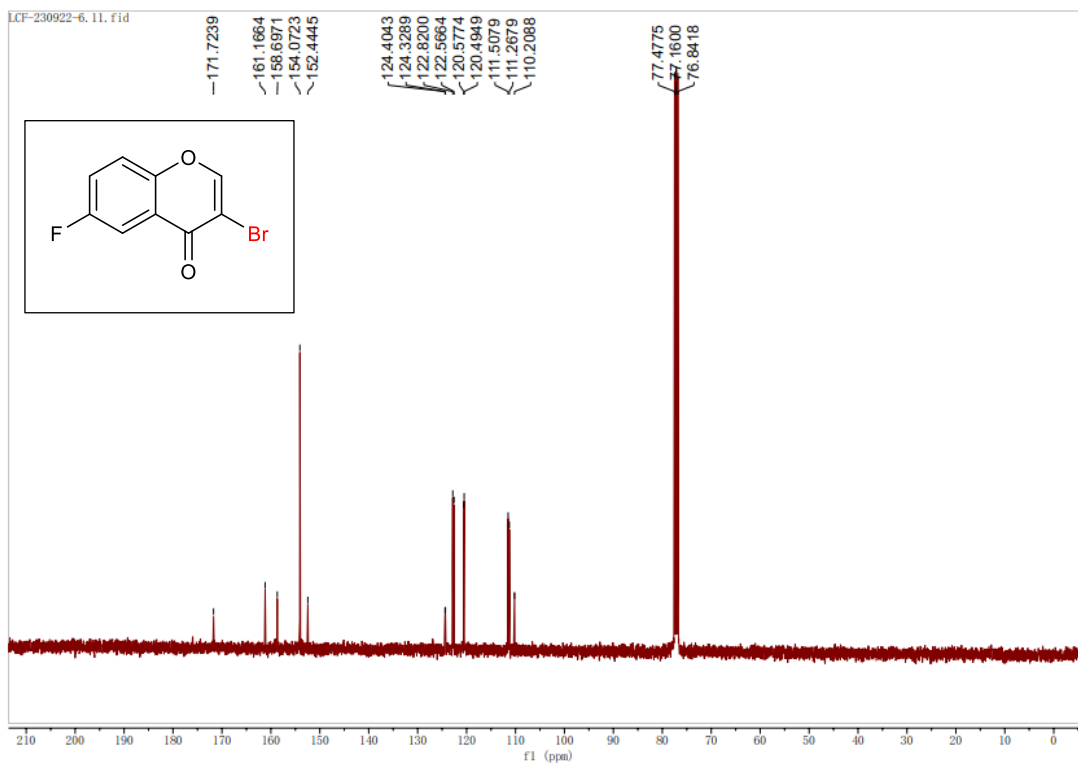

$^{13}\text{C}$  NMR Spectra of compound **4bd** in  $\text{CDCl}_3$  (101 MHz)

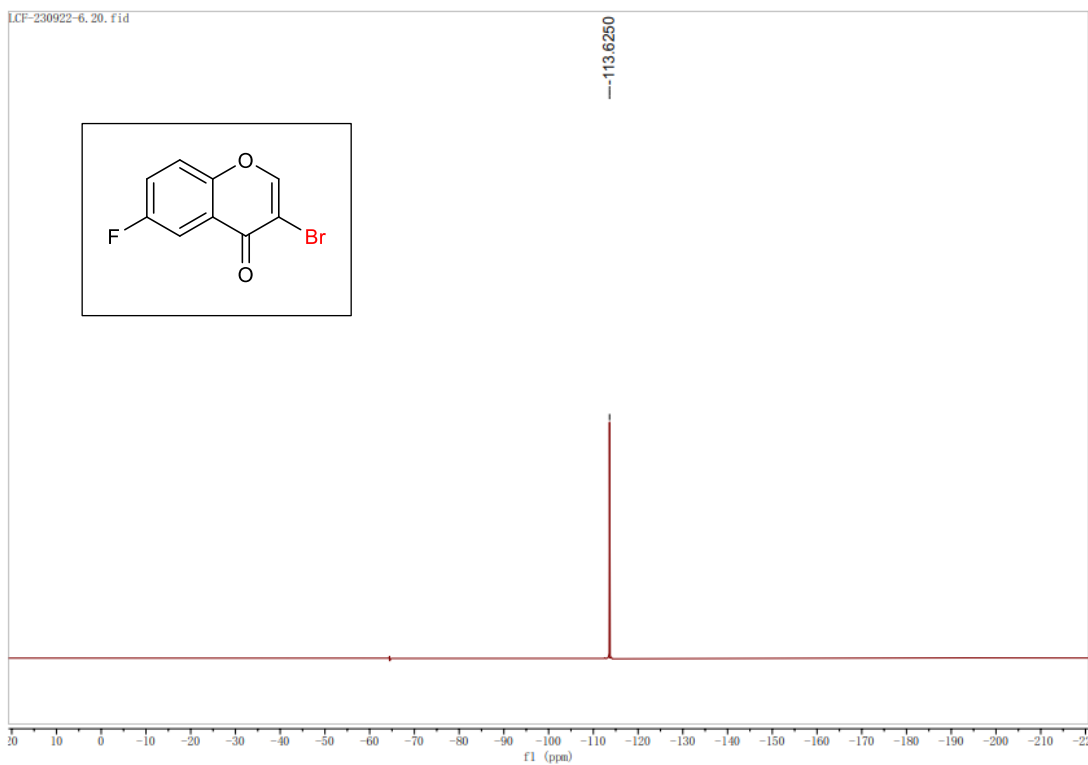

$^{19}\text{F}$  NMR Spectra of compound **4bd** in  $\text{CDCl}_3$  (377 MHz)

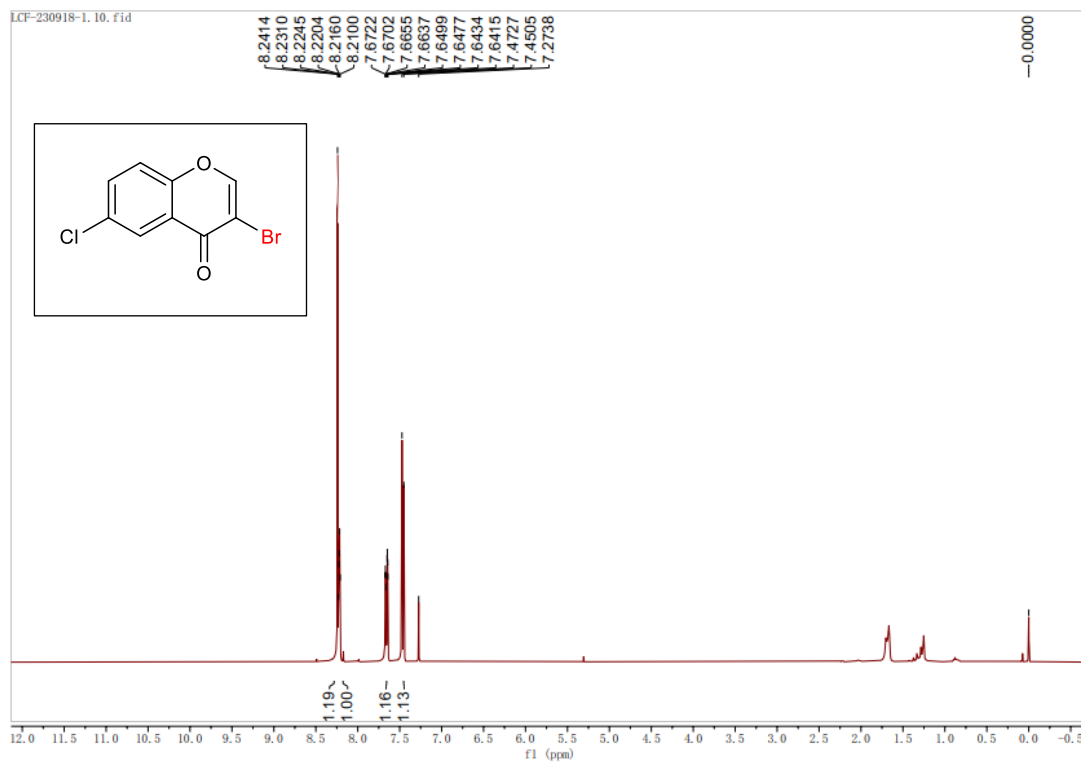

$^1\text{H}$  NMR Spectra of compound **4be** in  $\text{CDCl}_3$  (400 MHz)

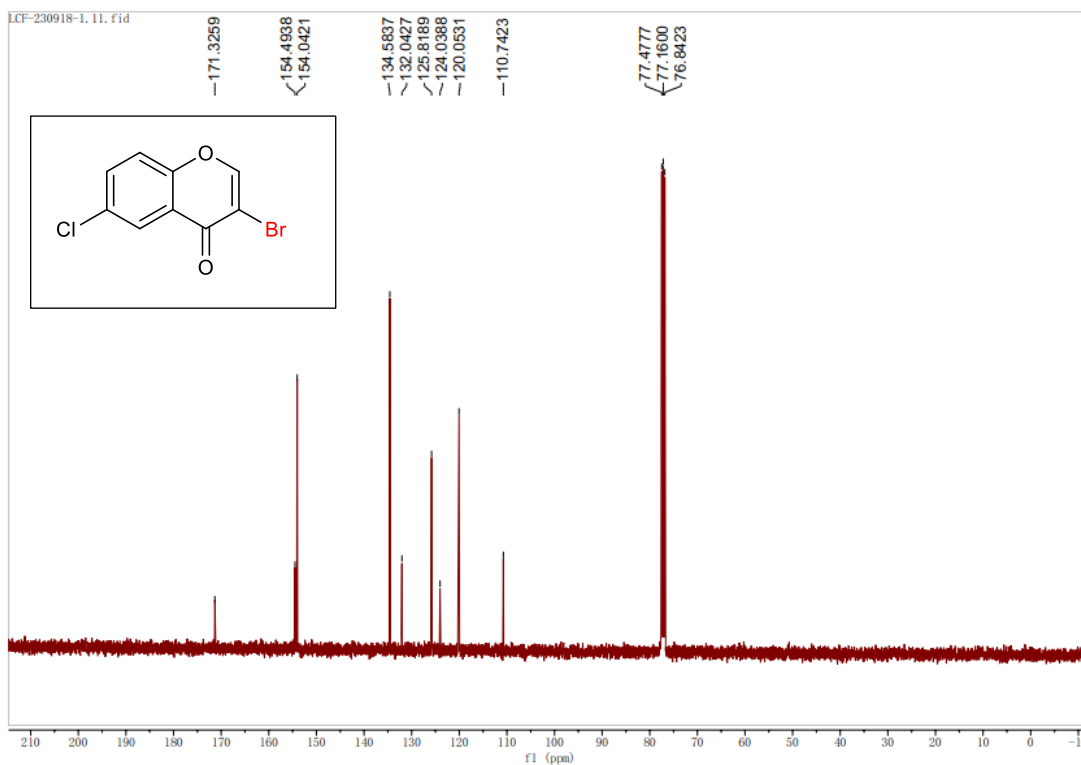

$^{13}\text{C}$  NMR Spectra of compound **4be** in  $\text{CDCl}_3$  (101 MHz)

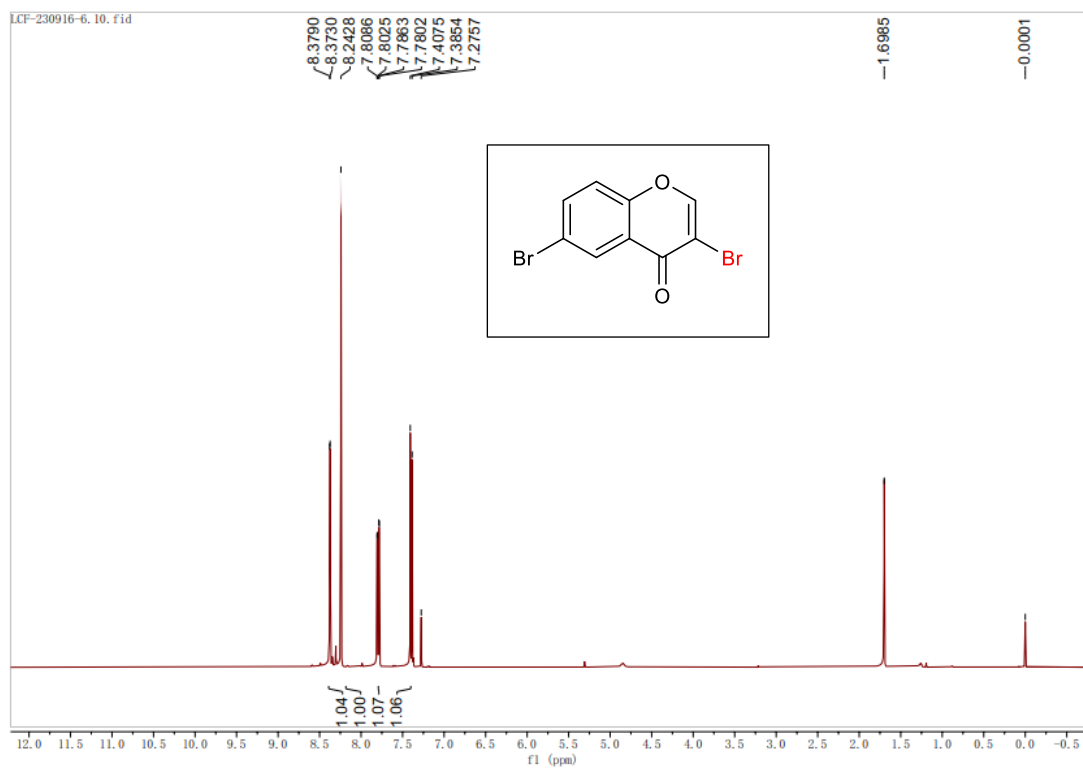

$^1\text{H}$  NMR Spectra of compound **4bf** in  $\text{CDCl}_3$  (400 MHz)

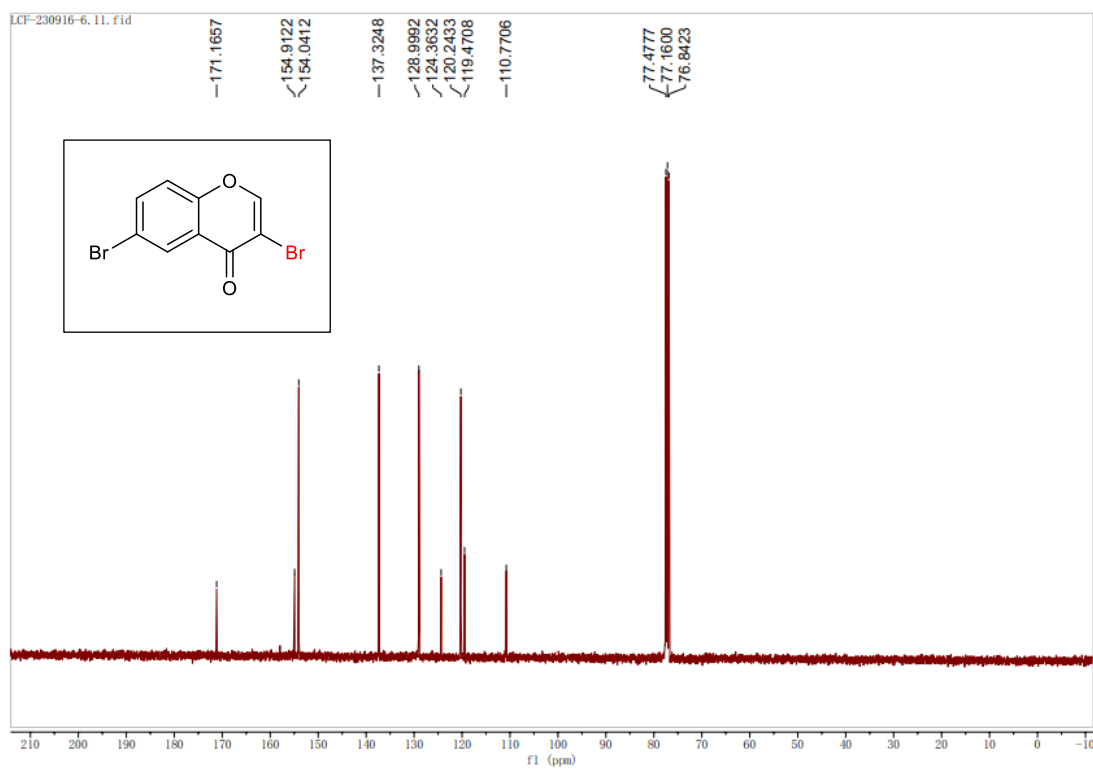

$^{13}\text{C}$  NMR Spectra of compound **4bf** in  $\text{CDCl}_3$  (101 MHz)

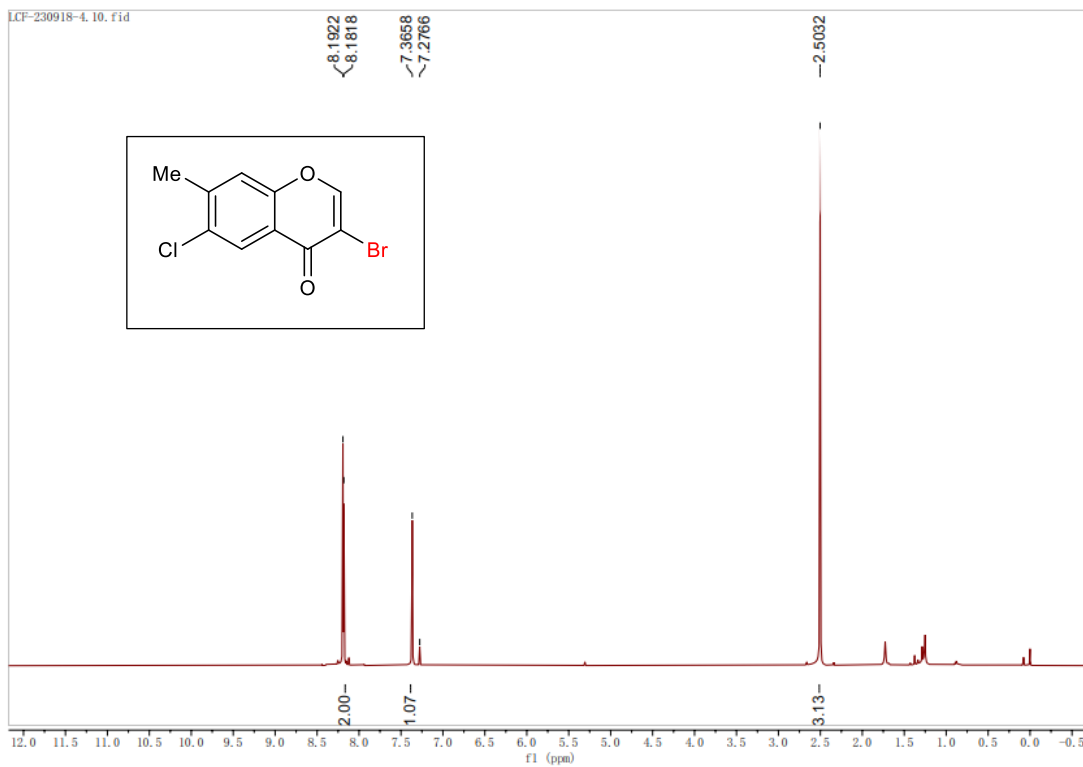

<sup>1</sup>H NMR Spectra of compound **4bg** in CDCl<sub>3</sub> (400 MHz)

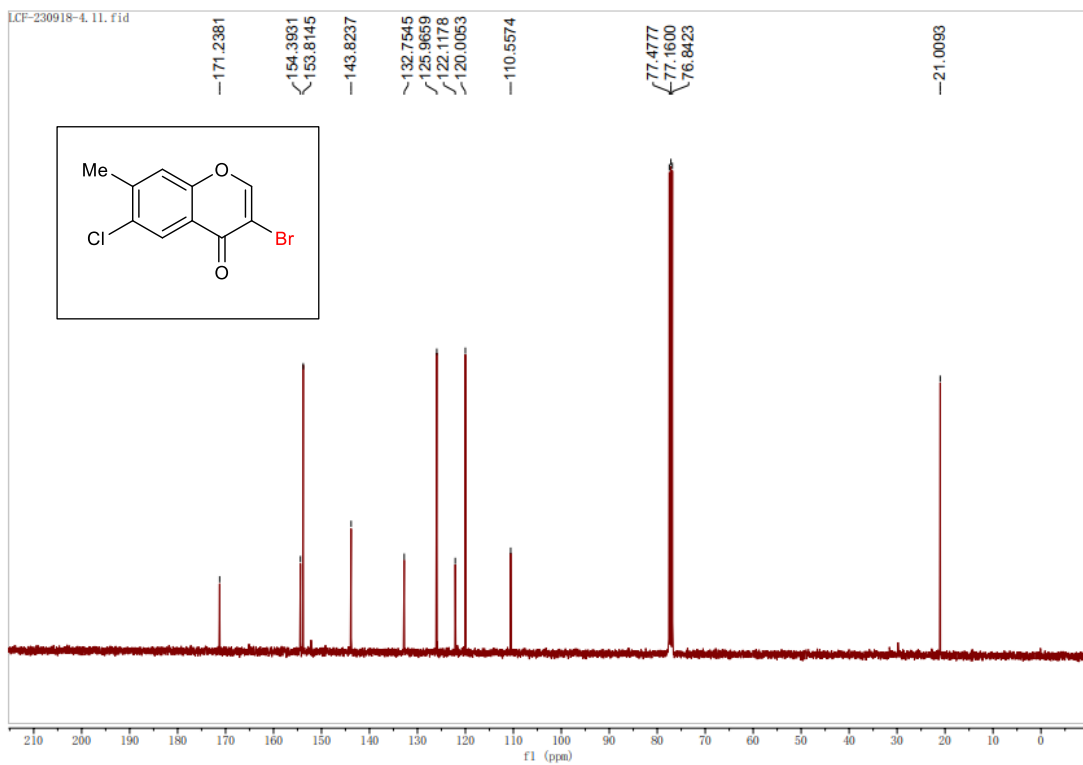

<sup>13</sup>C NMR Spectra of compound **4bg** in CDCl<sub>3</sub> (101 MHz)

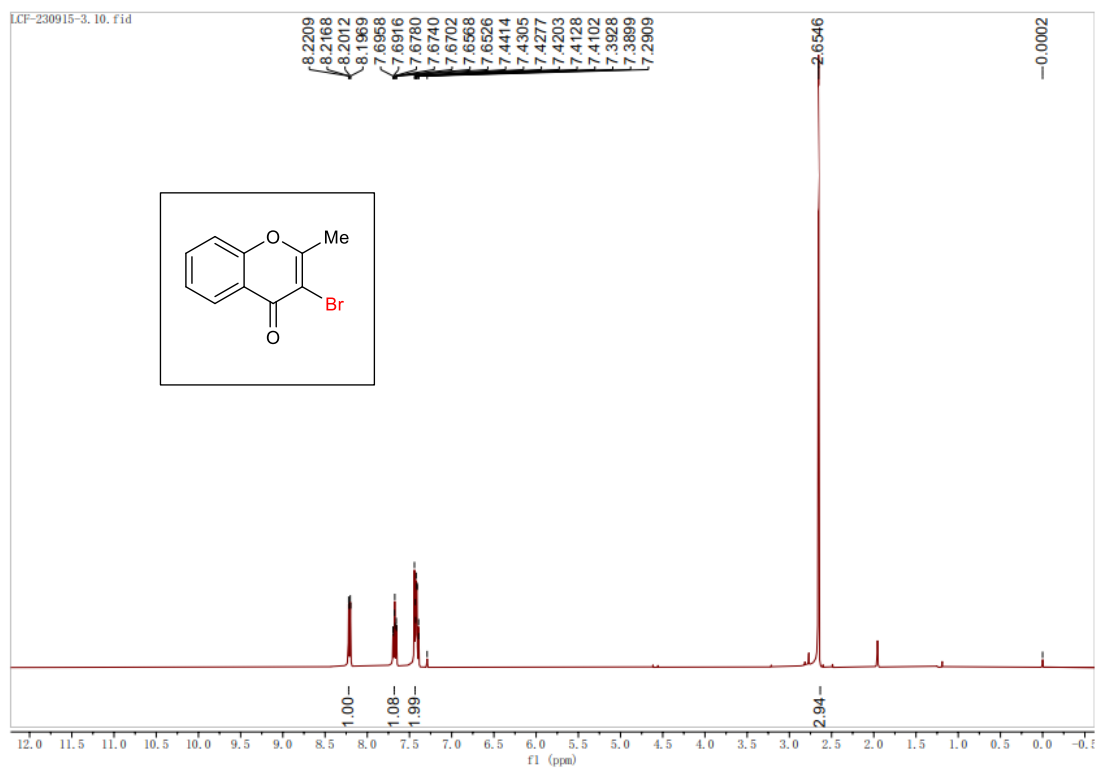

<sup>1</sup>H NMR Spectra of compound **4bh** in CDCl<sub>3</sub> (400 MHz)

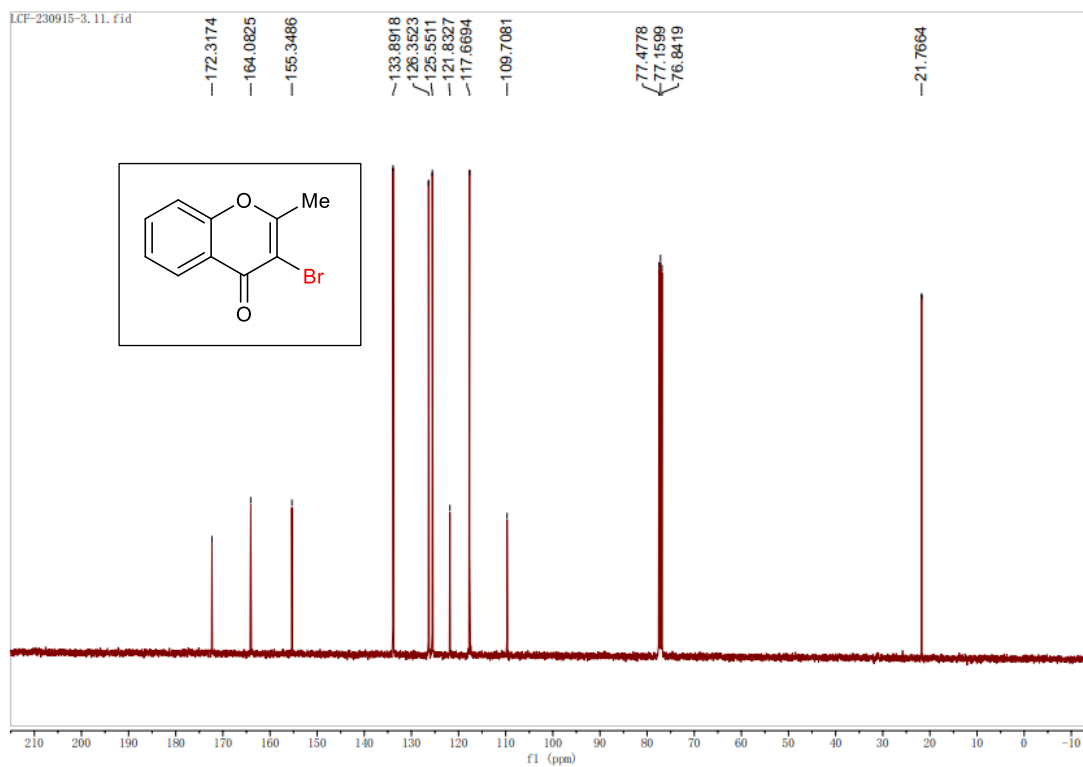

<sup>13</sup>C NMR Spectra of compound **4bh** in CDCl<sub>3</sub> (101 MHz)

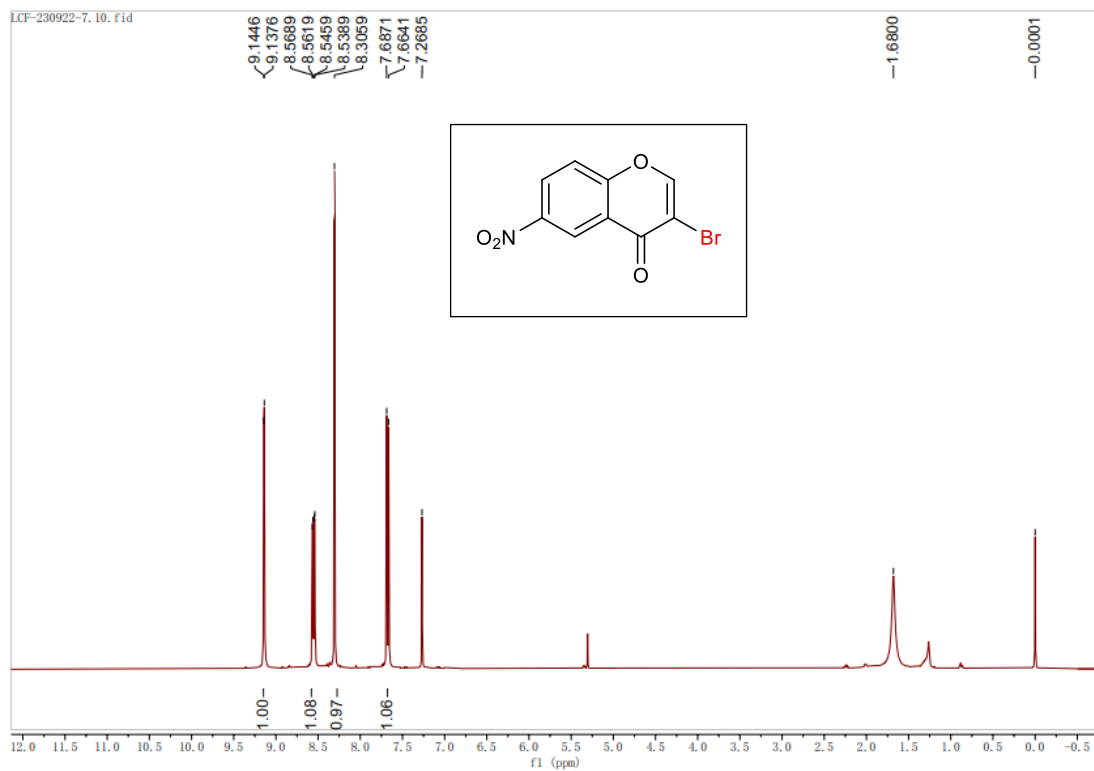

$^1\text{H}$  NMR Spectra of compound **4bi** in  $\text{CDCl}_3$  (400 MHz)

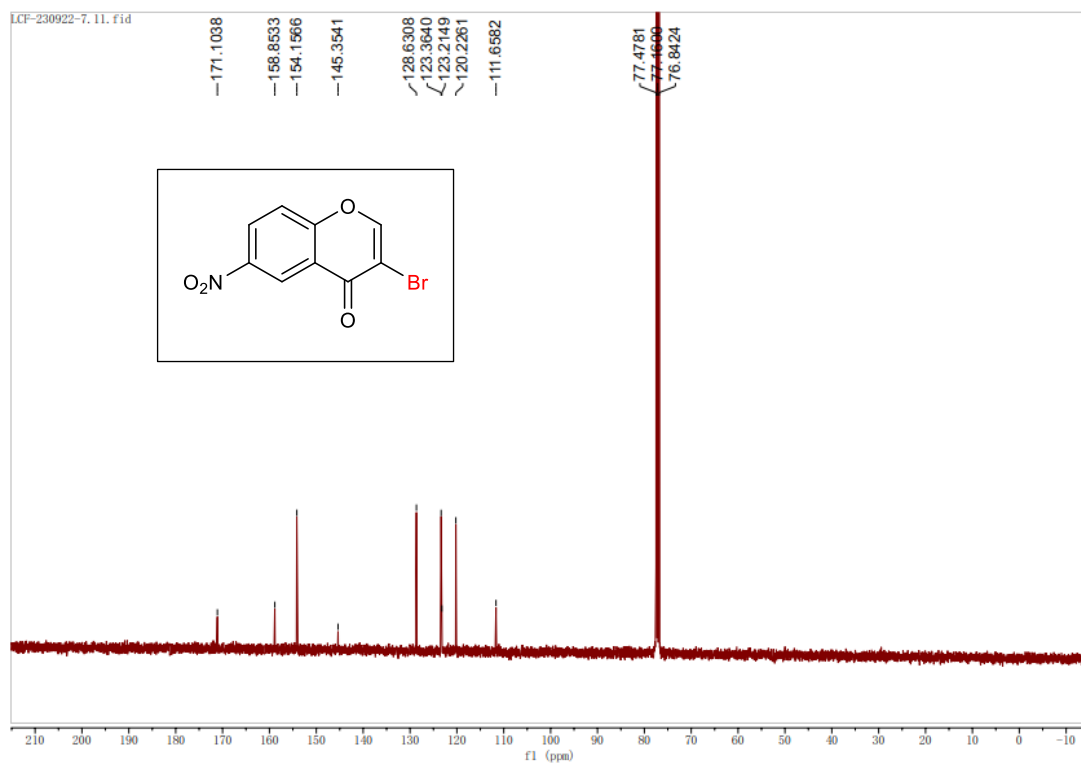

$^{13}\text{C}$  NMR Spectra of compound **4bi** in  $\text{CDCl}_3$  (101 MHz)

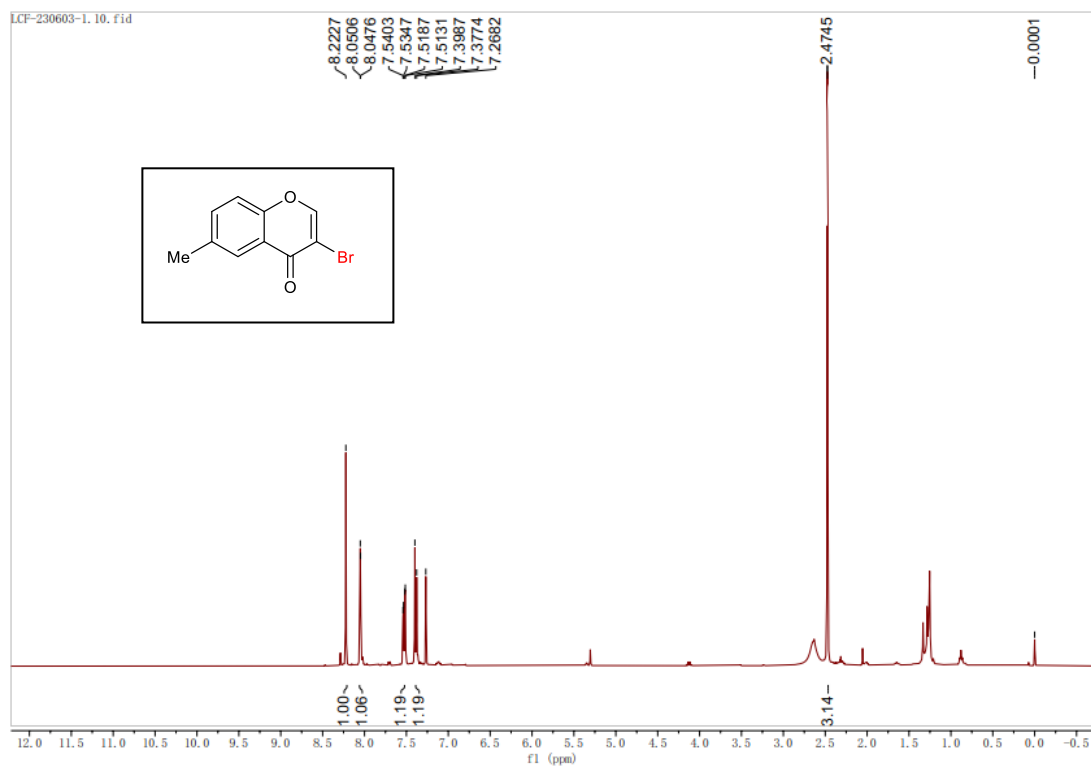

<sup>1</sup>H NMR Spectra of compound **4bj** in CDCl<sub>3</sub> (400 MHz)

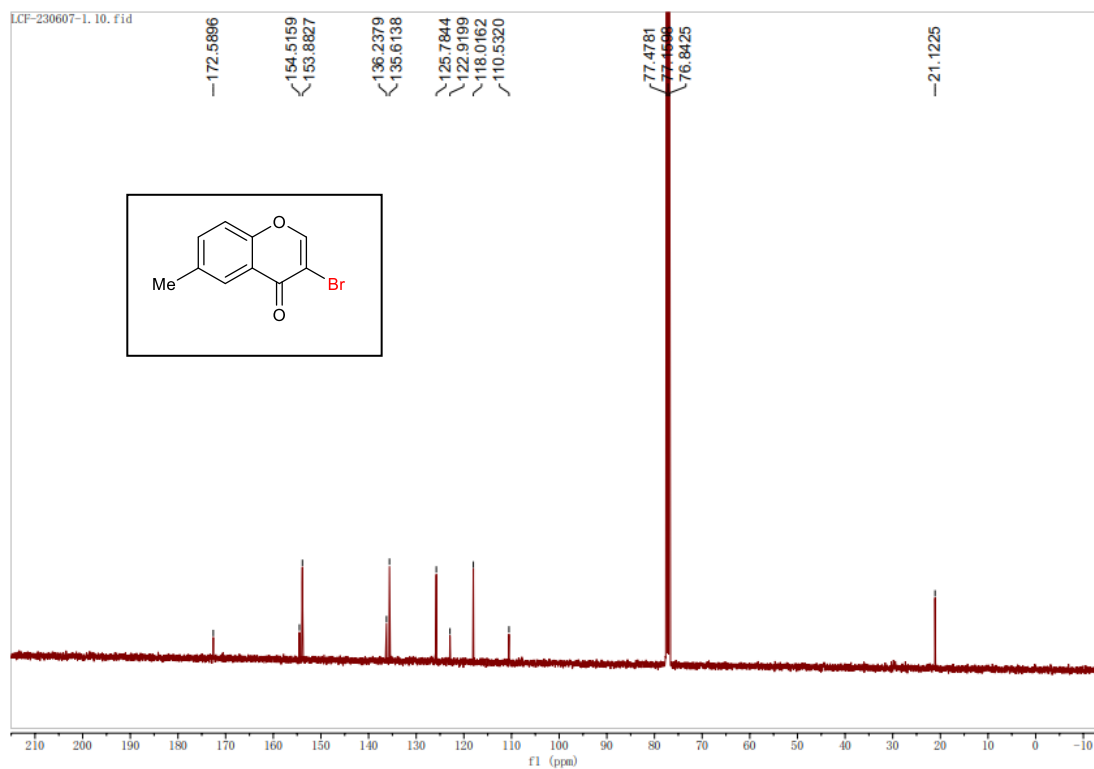

<sup>13</sup>C NMR Spectra of compound **4bj** in CDCl<sub>3</sub> (101 MHz)

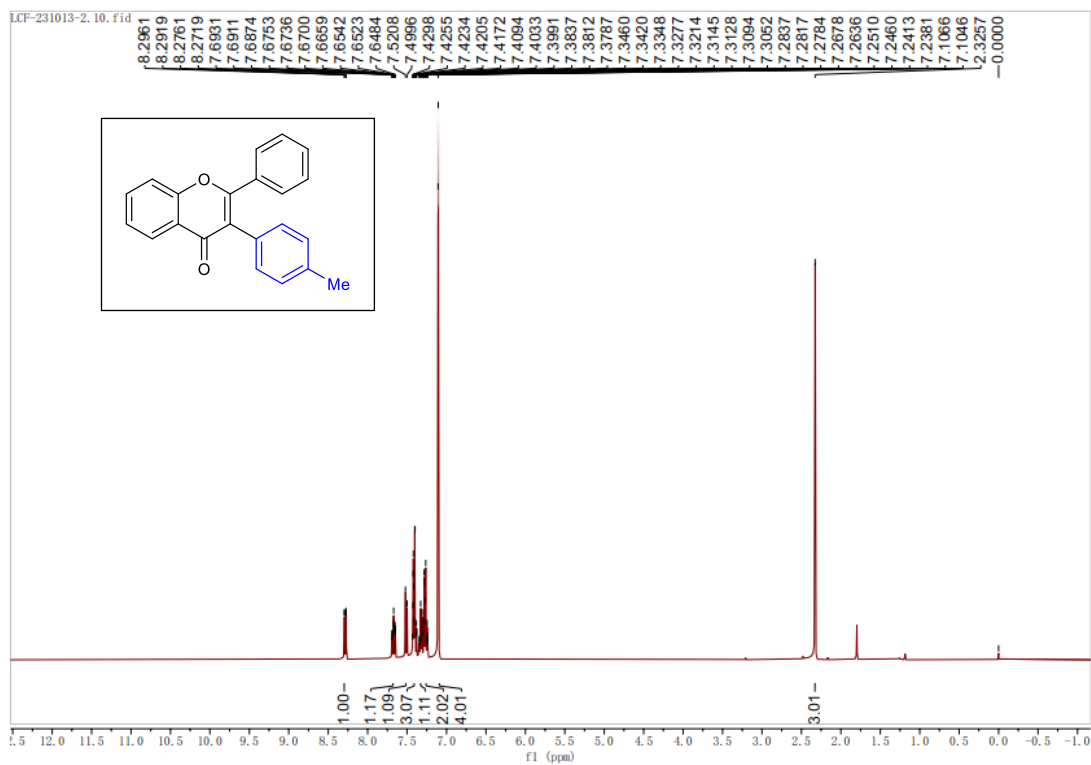

$^1\text{H}$  NMR Spectra of compound **5a** in  $\text{CDCl}_3$  (400 MHz)

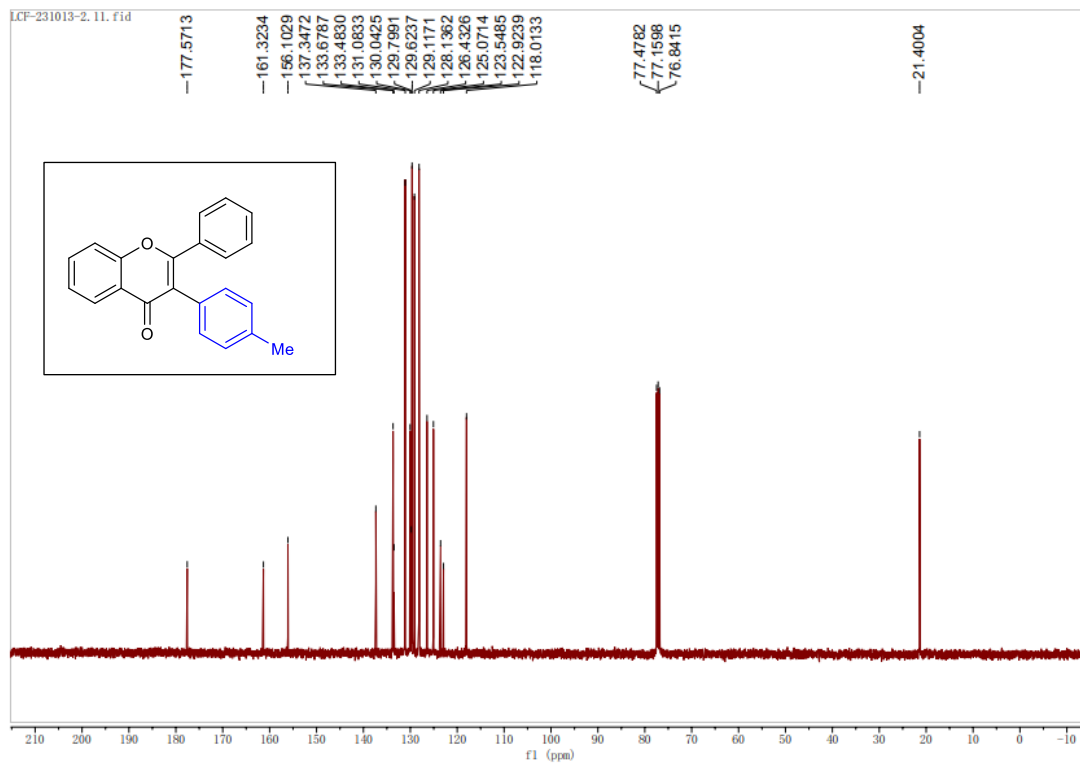

$^{13}\text{C}$  NMR Spectra of compound **5a** in  $\text{CDCl}_3$  (101 MHz)



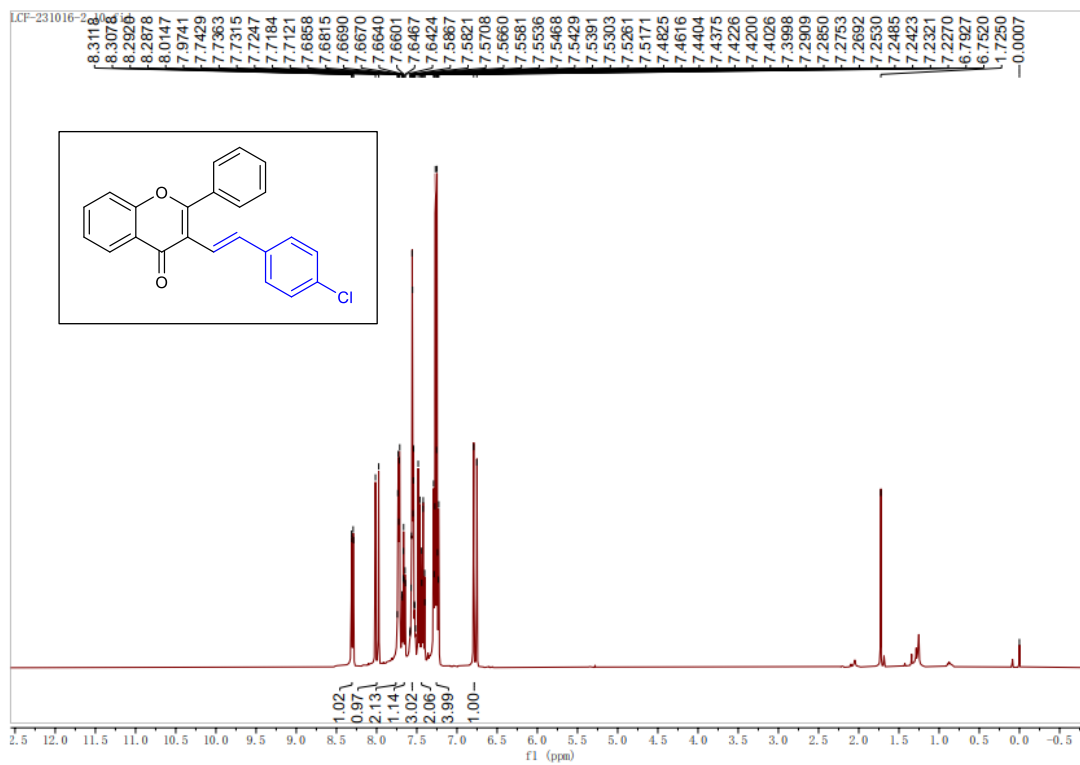

$^1\text{H}$  NMR Spectra of compound **5b** in  $\text{CDCl}_3$  (400 MHz)

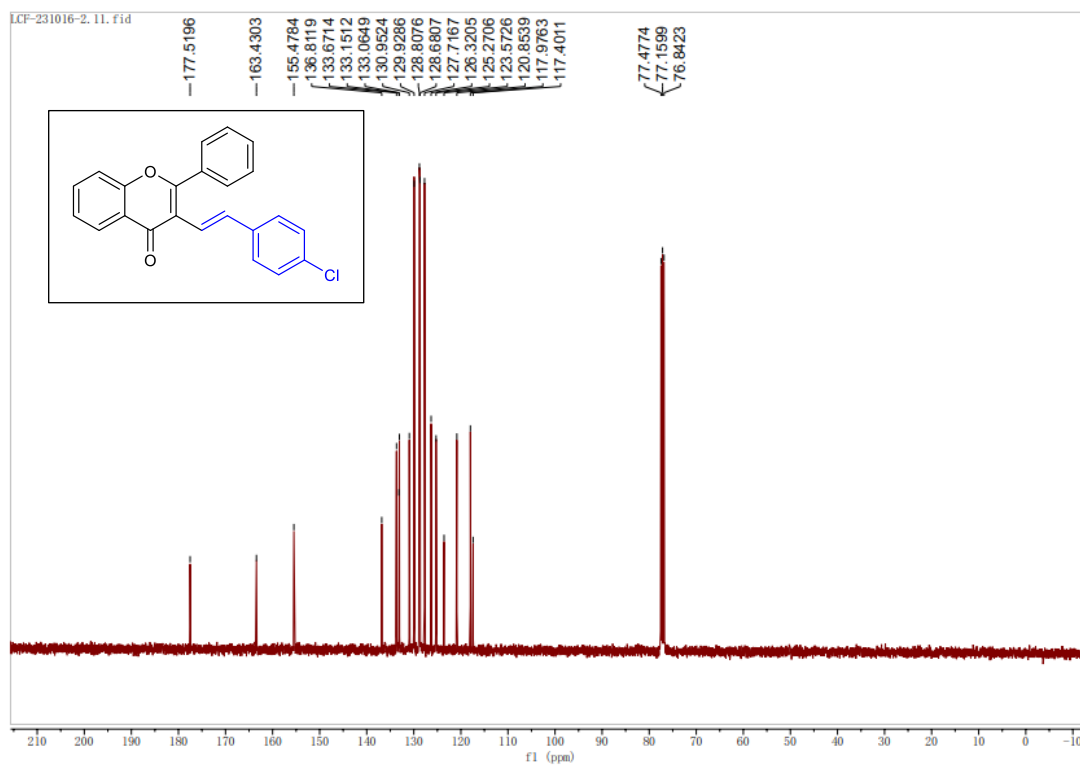

$^{13}\text{C}$  NMR Spectra of compound **5b** in  $\text{CDCl}_3$  (101 MHz)

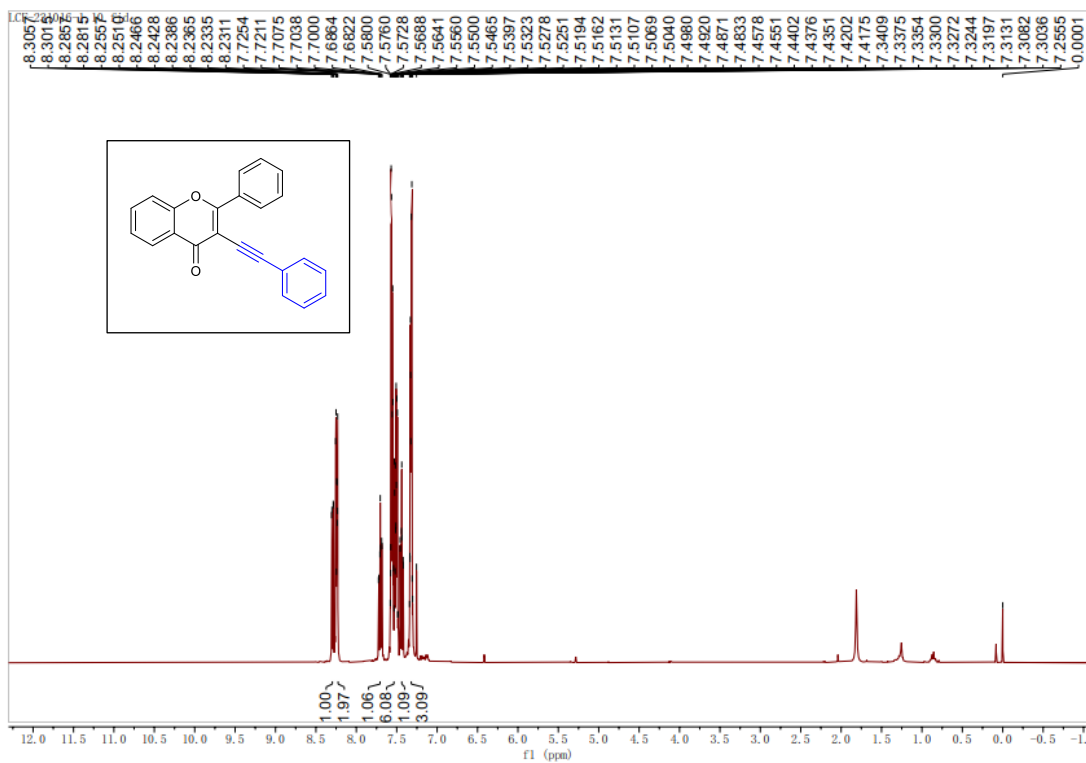

<sup>1</sup>H NMR Spectra of compound **5c** in CDCl<sub>3</sub> (400 MHz)

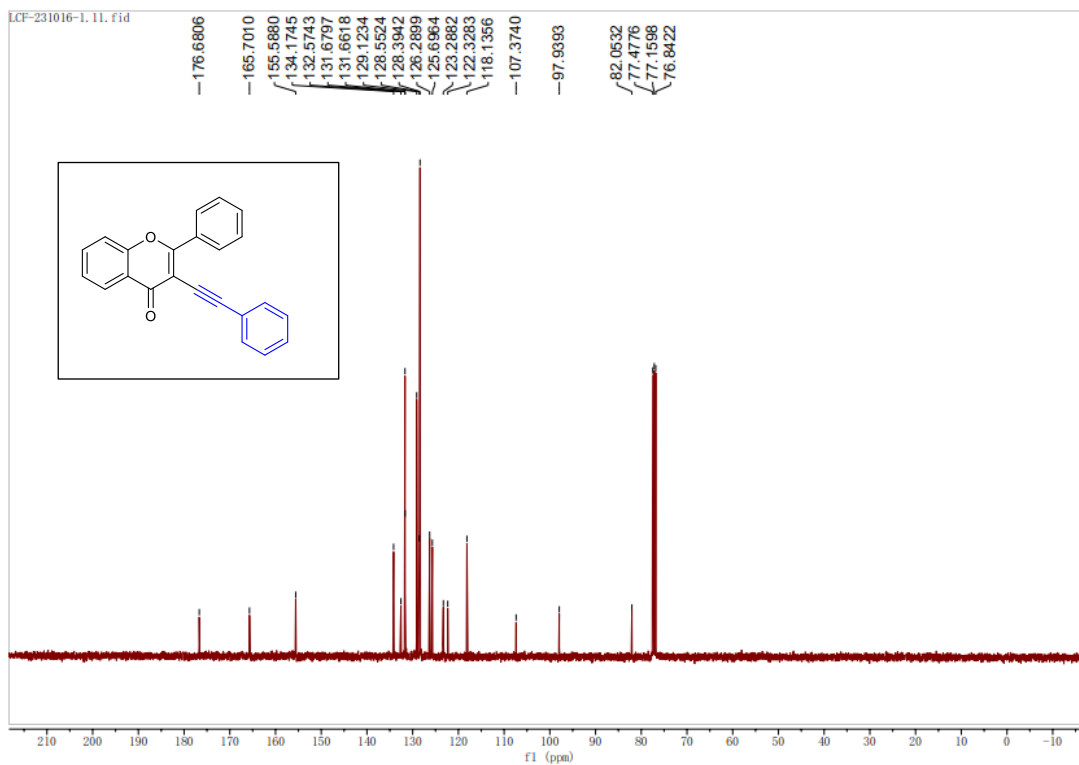

<sup>13</sup>C NMR Spectra of compound **5c** in CDCl<sub>3</sub> (101 MHz)
